# Supplementary material for: Transcriptome Analysis Reveals Crosstalk of Responsive Genes to Multiple Abiotic Stresses in Cotton (Gossypium hirsutum L.)
Source: PLoS One. 2013 Nov 5;8(11):e80218. doi: 10.1371/journal.pone.0080218 (PMC3818253; doi:10.1371/journal.pone.0080218)
Supplement: Tables S1 — Cotton microarray annotation data. (XLSX) [file pone.0080218.s001.xlsx]

## Sheet: ABA
Supplemental Table S1-1 A list of up-regulated genes in cotton seedlings under ABA treatment (fold change≥2, q-value≤0.05)
Probe Set ID	Representative Public ID	UniGene ID	Fold Change	q-value(%)	Target Description
Ghi.7915.4.S1_x_at	DT462458	Ghi.7915	79.8238	0	gb:DT462458 /DB_XREF=gi:73859719 /DB_XREF=GH_CHX12B22.r /CLONE=GH_CHX12B22 /TID=Ghi.7915.4 /CNT=2 /FEA=EST /TIER=ConsEnd /STK=1 /UG=Ghi.7915 /UG_TITLE=Transcribed locus, moderately similar to NP_565460.1 ceramide glucosyltransferase (Arabidopsis thaliana) /REP_ORG=G. hirsutum
Ghi.7915.3.S1_x_at	DN759701	Ghi.18254	71.3176	0	gb:DN759701 /DB_XREF=gi:84145459 /DB_XREF=G.hir-stem 2205 /TID=Ghi.7915.3 /CNT=1 /FEA=EST /TIER=ConsEnd /STK=0 /UG=Ghi.7915 /UG_TITLE=Transcribed locus, moderately similar to NP_565460.1 ceramide glucosyltransferase (Arabidopsis thaliana) /REP_ORG=G. hirsutum
Ghi.388.1.S1_x_at	DR460786	Ghi.388	52.2239	0	gb:DR460786 /DB_XREF=gi:84172138 /DB_XREF=CM090E06 /TID=Ghi.388.1 /CNT=3 /FEA=EST /TIER=ConsEnd /STK=0 /UG=Ghi.388 /UG_TITLE=Transcribed locus /REP_ORG=G. hirsutum
Ghi.10692.1.S1_s_at	DV850121	Ghi.10692	50.671	0	gb:DV850121 /DB_XREF=gi:82756559 /DB_XREF=GH_LSL28C08.f /CLONE=GH_LSL28C08 /TID=Ghi.10692.1 /CNT=2 /FEA=EST /TIER=ConsEnd /STK=0 /UG=Ghi.10692 /UG_TITLE=Transcribed locus, weakly similar to NP_189308.1 unknown protein (Arabidopsis thaliana) /REP_ORG=G. hirsutum
Ghi.3084.1.S1_s_at	DT527319	Ghi.3084	47.8518	0	gb:DT527319 /DB_XREF=gi:73944011 /DB_XREF=GH_OCF07C11.f /CLONE=GH_OCF07C11 /TID=Ghi.3084.1 /CNT=3 /FEA=EST /TIER=ConsEnd /STK=0 /UG=Ghi.3084 /UG_TITLE=Transcribed locus /REP_ORG=G. hirsutum
GarAffx.17438.1.S1_s_at	BE053864	---	42.8443	0	gb:BE053864 /DB_XREF=gi:13246512 /DB_XREF=GA__Ea0034G06f /CLONE=GA__Ea0034G06f /TID=GarAffx.17438.1 /CNT=3 /FEA=EST /TIER=ConsEnd /STK=2 /NOTE=sequence(s) not in UniGene /REP_ORG=G. arboreum
Ghi.3903.1.A1_at	DT460492	Ghi.3903	38.0045	0	gb:DT460492 /DB_XREF=gi:73851472 /DB_XREF=GH_ON39G06.r /CLONE=GH_ON39G06 /TID=Ghi.3903.1 /CNT=5 /FEA=EST /TIER=ConsEnd /STK=2 /UG=Ghi.3903 /UG_TITLE=Transcribed locus /REP_ORG=G. hirsutum
Ghi.3154.2.S1_s_at	DT464602	Ghi.3154	36.3382	0	gb:DT464602 /DB_XREF=gi:73861863 /DB_XREF=GH_CHX15P06.r /CLONE=GH_CHX15P06 /TID=Ghi.3154.2 /CNT=2 /FEA=EST /TIER=ConsEnd /STK=0 /UG=Ghi.3154 /UG_TITLE=Transcribed locus /REP_ORG=G. hirsutum
GhiAffx.25508.1.S1_at	DW496030.1	Ghi.12856	33.0891	0	gb:DW496030.1 dbest_id:35100458 /TID=GhiAffx.25508.1 /CNT=4 /FEA=EST /TIER=ConsEnd /STK=1 /NOTE=sequence(s) not in UniGene /REP_ORG=
Gra.39.1.A1_a_at	CO099146	Gra.39	32.8344	0	gb:CO099146 /DB_XREF=gi:48797832 /DB_XREF=GR__Ea23N19.f /CLONE=GR__Ea23N19 /TID=Gra.39.1 /CNT=3 /FEA=EST /TIER=ConsEnd /STK=1 /UG=Gra.39 /UG_TITLE=Transcribed locus, weakly similar to NP_912350.1 unknown protein (Oryza sativa (japonica cultivar-group)) /REP_ORG=G. raimondii
Ghi.388.2.S1_x_at	DR460075	Ghi.3114	27.306	0	gb:DR460075 /DB_XREF=gi:84171427 /DB_XREF=CM083A04 /TID=Ghi.388.2 /CNT=1 /FEA=EST /TIER=ConsEnd /STK=0 /UG=Ghi.388 /UG_TITLE=Transcribed locus /REP_ORG=G. hirsutum
Ghi.3540.1.A1_at	DT463979	Ghi.17877	26.5155	0	gb:DT463979 /DB_XREF=gi:73861240 /DB_XREF=GH_CHX14L05.r /CLONE=GH_CHX14L05 /TID=Ghi.3540.1 /CNT=2 /FEA=EST /TIER=ConsEnd /STK=1 /UG=Ghi.3540 /UG_TITLE=Transcribed locus, moderately similar to NP_174527.2 EMB2733; ATP binding ATP-dependent RNA helicase ATP-dependent helicase helicase nucleic acid binding (Arabidopsis thaliana) /REP_ORG=G. hirsutum
Ghi.3084.1.A1_at	DT468756	Ghi.3084	26.4132	0	gb:DT468756 /DB_XREF=gi:73866018 /DB_XREF=GH_CHX22G11.r /CLONE=GH_CHX22G11 /TID=Ghi.3084.1 /CNT=3 /FEA=EST /TIER=ConsEnd /STK=1 /UG=Ghi.3084 /UG_TITLE=Transcribed locus /REP_ORG=G. hirsutum
Ghi.9276.2.A1_at	DT458584	Ghi.9276	25.8837	0	gb:DT458584 /DB_XREF=gi:73849564 /DB_XREF=GH_ON36G01.r /CLONE=GH_ON36G01 /TID=Ghi.9276.2 /CNT=2 /FEA=EST /TIER=ConsEnd /STK=0 /UG=Ghi.9276 /UG_TITLE=Transcribed locus, weakly similar to XP_471437.1 OSJNBb0012A12.12 (Oryza sativa (japonica cultivar-group)) /REP_ORG=G. hirsutum
Gra.70.1.S1_s_at	CO076413	Gra.1108	25.8206	0	gb:CO076413 /DB_XREF=gi:48745894 /DB_XREF=GR__Ea37L20.r /CLONE=GR__Ea37L20 /TID=Gra.70.1 /CNT=188 /FEA=EST /TIER=ConsEnd /STK=0 /UG=Gra.70 /UG_TITLE=Transcribed locus, strongly similar to NP_200288.1 thiazole biosynthetic enzyme, chloroplast (ARA6) (THI1) (THI4) (Arabidopsis thaliana) /REP_ORG=G. raimondii
GraAffx.3175.1.S1_at	CO117464	---	25.2435	0	gb:CO117464 /DB_XREF=gi:48816151 /DB_XREF=GR__Eb01E10.r /CLONE=GR__Eb01E10 /TID=GraAffx.3175.1 /CNT=2 /FEA=EST /TIER=ConsEnd /STK=1 /NOTE=sequence(s) not in UniGene /REP_ORG=G. raimondii
Ghi.10424.1.S1_s_at	CA993457	Ghi.10424	24.2014	0	gb:CA993457 /DB_XREF=gi:31073178 /DB_XREF=pAR07H08 /TID=Ghi.10424.1 /CNT=7 /FEA=EST /TIER=ConsEnd /STK=0 /UG=Ghi.10424 /UG_TITLE=Transcribed locus, moderately similar to XP_478512.1 putative thiamine biosynthesis protein (Oryza sativa (japonica cultivar-group)) /REP_ORG=G. hirsutum
Ghi.9402.2.A1_at	DT457120	Ghi.9402	23.9057	0	gb:DT457120 /DB_XREF=gi:73848100 /DB_XREF=GH_ON34B07.r /CLONE=GH_ON34B07 /TID=Ghi.9402.2 /CNT=7 /FEA=EST /TIER=ConsEnd /STK=0 /UG=Ghi.9402 /UG_TITLE=Transcribed locus /REP_ORG=G. hirsutum
Ghi.3154.2.A1_at	DT468960	Ghi.3154	23.7475	0	gb:DT468960 /DB_XREF=gi:73866222 /DB_XREF=GH_CHX22L18.r /CLONE=GH_CHX22L18 /TID=Ghi.3154.2 /CNT=2 /FEA=EST /TIER=ConsEnd /STK=1 /UG=Ghi.3154 /UG_TITLE=Transcribed locus /REP_ORG=G. hirsutum
GhiAffx.7960.1.A1_at	DT047675	Ghi.19232	23.7306	0	gb:DT047675 /DB_XREF=gi:72270481 /DB_XREF=COT_CQ_H06 /TID=GhiAffx.7960.1 /CNT=2 /FEA=EST /TIER=ConsEnd /STK=1 /NOTE=sequence(s) not in UniGene /REP_ORG=G. hirsutum
Gra.610.2.A1_at	CO095621	Gra.610	23.1244	0	gb:CO095621 /DB_XREF=gi:48794307 /DB_XREF=GR__Ea18F12.r /CLONE=GR__Ea18F12 /TID=Gra.610.2 /CNT=3 /FEA=EST /TIER=ConsEnd /STK=2 /UG=Gra.610 /UG_TITLE=Transcribed locus, moderately similar to XP_479153.1 elongation factor 1 beta (Oryza sativa (japonica cultivar-group)) /REP_ORG=G. raimondii
Ghi.1441.1.S1_s_at	DR456691	Ghi.1441	22.1855	0	gb:DR456691 /DB_XREF=gi:84168043 /DB_XREF=CM047D10 /TID=Ghi.1441.1 /CNT=3 /FEA=EST /TIER=ConsEnd /STK=0 /UG=Ghi.1441 /UG_TITLE=Transcribed locus, moderately similar to NP_563877.1 SEX1 (STARCH EXCESS 1) (Arabidopsis thaliana) /REP_ORG=G. hirsutum
Ghi.3442.2.S1_at	DT456437	Ghi.16317	21.9593	0	gb:DT456437 /DB_XREF=gi:73847417 /DB_XREF=GH_ON15G11.f /CLONE=GH_ON15G11 /TID=Ghi.3442.2 /CNT=6 /FEA=EST /TIER=ConsEnd /STK=0 /UG=Ghi.3442 /UG_TITLE=Transcribed locus, moderately similar to NP_563728.1 unknown protein (Arabidopsis thaliana) /REP_ORG=G. hirsutum
Ghi.7968.1.A1_x_at	AI055006	Ghi.7968	21.7364	0	gb:AI055006 /DB_XREF=gi:3326120 /DB_XREF=coau0002M09 /CLONE=coau0002M09 /TID=Ghi.7968.1 /CNT=2 /FEA=EST /TIER=ConsEnd /STK=0 /UG=Ghi.7968 /UG_TITLE=Transcribed locus /REP_ORG=G. hirsutum
Ghi.3808.1.S1_at	DT461567	Ghi.3808	21.4469	0	gb:DT461567 /DB_XREF=gi:73858828 /DB_XREF=GH_CHX01H09.x /CLONE=GH_CHX01H09 /TID=Ghi.3808.1 /CNT=1 /FEA=EST /TIER=ConsEnd /STK=0 /UG=Ghi.3808 /UG_TITLE=Transcribed locus /REP_ORG=G. hirsutum
GhiAffx.46892.1.S1_at	DR454365	Ghi.17765	21.4348	0	gb:DR454365 /DB_XREF=gi:84165717 /DB_XREF=CM023A06 /TID=GhiAffx.46892.1 /CNT=2 /FEA=EST /TIER=ConsEnd /STK=0 /NOTE=sequence(s) not in UniGene /REP_ORG=G. hirsutum
Ghi.5426.1.A1_at	DT047789	Ghi.5426	21.3953	0	gb:DT047789 /DB_XREF=gi:72270709 /DB_XREF=COT_CS_D04 /TID=Ghi.5426.1 /CNT=1 /FEA=EST /TIER=ConsEnd /STK=1 /UG=Ghi.5426 /UG_TITLE=Transcribed locus /REP_ORG=G. hirsutum
GhiAffx.31245.2.S1_at	DT464169	---	20.7497	0	gb:DT464169 /DB_XREF=gi:73861430 /DB_XREF=GH_CHX15C13.f /CLONE=GH_CHX15C13 /TID=GhiAffx.31245.2 /CNT=3 /FEA=EST /TIER=ConsEnd /STK=0 /NOTE=sequence(s) not in UniGene /REP_ORG=G. hirsutum
Ghi.7915.4.A1_s_at	DT462458	Ghi.7915	20.3951	0	gb:DT462458 /DB_XREF=gi:73859719 /DB_XREF=GH_CHX12B22.r /CLONE=GH_CHX12B22 /TID=Ghi.7915.4 /CNT=2 /FEA=EST /TIER=ConsEnd /STK=0 /UG=Ghi.7915 /UG_TITLE=Transcribed locus, moderately similar to NP_565460.1 ceramide glucosyltransferase (Arabidopsis thaliana) /REP_ORG=G. hirsutum
Ghi.10577.1.S1_at	DN760777	Ghi.10577	20.0354	0	gb:DN760777 /DB_XREF=gi:84146535 /DB_XREF=G.hir-stem 3284 /TID=Ghi.10577.1 /CNT=4 /FEA=EST /TIER=ConsEnd /STK=0 /UG=Ghi.10577 /UG_TITLE=Transcribed locus /REP_ORG=G. hirsutum
GhiAffx.45595.1.S1_at	DW231139.1	Ghi.9336	19.2503	0	gb:DW231139.1 dbest_id:34835311 /TID=GhiAffx.45595.1 /CNT=2 /FEA=EST /TIER=ConsEnd /STK=1 /NOTE=sequence(s) not in UniGene /REP_ORG=
Ghi.5120.1.A1_at	DT049001	Ghi.9336	19.1037	0	gb:DT049001 /DB_XREF=gi:72273134 /DB_XREF=COT_DH_F01 /TID=Ghi.5120.1 /CNT=2 /FEA=EST /TIER=ConsEnd /STK=1 /UG=Ghi.5120 /UG_TITLE=Transcribed locus /REP_ORG=G. hirsutum
Gra.1742.1.A1_s_at	CO121872	Gra.2119	18.1441	0	gb:CO121872 /DB_XREF=gi:48820559 /DB_XREF=GR__Eb03D24.r /CLONE=GR__Eb03D24 /TID=Gra.1742.1 /CNT=3 /FEA=EST /TIER=ConsEnd /STK=1 /UG=Gra.1742 /UG_TITLE=Transcribed locus, weakly similar to NP_563877.1 starch excess protein (SEX1) (Arabidopsis thaliana) /REP_ORG=G. raimondii
GraAffx.27548.2.S1_at	CO123205	---	18.037	0	gb:CO123205 /DB_XREF=gi:48821892 /DB_XREF=GR__Eb05D16.r /CLONE=GR__Eb05D16 /TID=GraAffx.27548.2 /CNT=2 /FEA=EST /TIER=ConsEnd /STK=1 /NOTE=sequence(s) not in UniGene /REP_ORG=G. raimondii
Ghi.1617.1.S1_at	DN759663	Ghi.1617	17.72	0	gb:DN759663 /DB_XREF=gi:84145421 /DB_XREF=G.hir-stem 2167 /TID=Ghi.1617.1 /CNT=2 /FEA=EST /TIER=ConsEnd /STK=0 /UG=Ghi.1617 /UG_TITLE=Transcribed locus /REP_ORG=G. hirsutum
Ghi.3781.2.S1_at	DT050044	Ghi.17615	17.5027	0	gb:DT050044 /DB_XREF=gi:72275254 /DB_XREF=COT_DU_D04 /TID=Ghi.3781.2 /CNT=2 /FEA=EST /TIER=ConsEnd /STK=1 /UG=Ghi.3781 /UG_TITLE=Transcribed locus /REP_ORG=G. hirsutum
Ghi.1707.1.S1_x_at	DN759792	Ghi.1707	17.1926	0	gb:DN759792 /DB_XREF=gi:84145550 /DB_XREF=G.hir-stem 2296 /TID=Ghi.1707.1 /CNT=2 /FEA=EST /TIER=ConsEnd /STK=0 /UG=Ghi.1707 /UG_TITLE=Transcribed locus /REP_ORG=G. hirsutum
Ghi.241.1.S1_at	DR461542	Ghi.9793	17.1918	0	gb:DR461542 /DB_XREF=gi:84172894 /DB_XREF=CM098E05 /TID=Ghi.241.1 /CNT=1 /FEA=EST /TIER=ConsEnd /STK=1 /UG=Ghi.241 /UG_TITLE=Transcribed locus /REP_ORG=G. hirsutum
Ghi.3992.1.A1_at	DT459290	Ghi.3992	17.1765	0	gb:DT459290 /DB_XREF=gi:73850270 /DB_XREF=GH_ON37H08.r /CLONE=GH_ON37H08 /TID=Ghi.3992.1 /CNT=1 /FEA=EST /TIER=ConsEnd /STK=1 /UG=Ghi.3992 /UG_TITLE=Transcribed locus /REP_ORG=G. hirsutum
Ghi.4727.1.A1_at	DT051170	Ghi.4727	16.8368	0	gb:DT051170 /DB_XREF=gi:72277510 /DB_XREF=COT_EI_G03 /TID=Ghi.4727.1 /CNT=3 /FEA=EST /TIER=ConsEnd /STK=3 /UG=Ghi.4727 /UG_TITLE=Transcribed locus /REP_ORG=G. hirsutum
Ghi.9276.1.S1_at	DT468770	Ghi.9276	16.5669	0	gb:DT468770 /DB_XREF=gi:73866032 /DB_XREF=GH_CHX22G18.r /CLONE=GH_CHX22G18 /TID=Ghi.9276.1 /CNT=3 /FEA=EST /TIER=ConsEnd /STK=1 /UG=Ghi.9276 /UG_TITLE=Transcribed locus, weakly similar to XP_471437.1 OSJNBb0012A12.12 (Oryza sativa (japonica cultivar-group)) /REP_ORG=G. hirsutum
Ghi.3873.1.S1_at	DR460975	Ghi.3873	16.4061	0	gb:DR460975 /DB_XREF=gi:84172327 /DB_XREF=CM092E06 /TID=Ghi.3873.1 /CNT=4 /FEA=EST /TIER=ConsEnd /STK=0 /UG=Ghi.3873 /UG_TITLE=Transcribed locus /REP_ORG=G. hirsutum
Ghi.3411.2.A1_x_at	DT051535	---	16.3699	0	gb:DT051535 /DB_XREF=gi:72278426 /DB_XREF=COT_EN_C08 /TID=Ghi.3411.2 /CNT=1 /FEA=EST /TIER=ConsEnd /STK=1 /UG=Ghi.3411 /UG_TITLE=Transcribed locus, weakly similar to NP_179895.2 ubiquitin-protein ligase (Arabidopsis thaliana) /REP_ORG=G. hirsutum
Ghi.3781.2.A1_s_at	DN817927	Ghi.17615	16.2678	0	gb:DN817927 /DB_XREF=gi:84156701 /DB_XREF=G.hir-seedling 1127 /TID=Ghi.3781.2 /CNT=2 /FEA=EST /TIER=ConsEnd /STK=0 /UG=Ghi.3781 /UG_TITLE=Transcribed locus /REP_ORG=G. hirsutum
Ghi.2643.1.S1_at	AI728629	Ghi.17761	16.2337	0	gb:AI728629 /DB_XREF=gi:5047481 /DB_XREF=BNLGHi11270 /TID=Ghi.2643.1 /CNT=3 /FEA=EST /TIER=ConsEnd /STK=0 /UG=Ghi.2643 /UG_TITLE=Transcribed locus, moderately similar to NP_568490.2 LON_ARA_ARA; ATP binding ATP-dependent peptidase nucleoside-triphosphatase nucleotide binding serine-type endopeptidase serine-type peptidase (Arabidopsis thaliana) /REP_ORG=G. hirsutum
Ghi.5425.1.A1_at	DT047790	Ghi.5425	16.1525	0	gb:DT047790 /DB_XREF=gi:72270711 /DB_XREF=COT_CS_D05 /TID=Ghi.5425.1 /CNT=2 /FEA=EST /TIER=ConsEnd /STK=0 /UG=Ghi.5425 /UG_TITLE=Transcribed locus /REP_ORG=G. hirsutum
GhiAffx.830.1.S1_at	DW513501.1	Ghi.12843	15.924	0	gb:DW513501.1 dbest_id:35119284 /TID=GhiAffx.830.1 /CNT=3 /FEA=EST /TIER=ConsEnd /STK=1 /NOTE=sequence(s) not in UniGene /REP_ORG=
GhiAffx.21769.1.A1_at	DW497097.1	Ghi.13644	15.8026	0	gb:DW497097.1 dbest_id:35101525 /TID=GhiAffx.21769.1 /CNT=3 /FEA=EST /TIER=ConsEnd /STK=0 /NOTE=sequence(s) not in UniGene /REP_ORG=
Ghi.3995.1.A1_s_at	DT462064	Ghi.3995	15.7632	0	gb:DT462064 /DB_XREF=gi:73859325 /DB_XREF=GH_CHX08B07.x /CLONE=GH_CHX08B07 /TID=Ghi.3995.1 /CNT=3 /FEA=EST /TIER=ConsEnd /STK=0 /UG=Ghi.3995 /UG_TITLE=Transcribed locus, weakly similar to XP_537919.2 PREDICTED: hypothetical protein XP_537919 (Canis familiaris) /REP_ORG=G. hirsutum
Ghi.4687.1.A1_s_at	DT051409	Ghi.4687	15.3134	0	gb:DT051409 /DB_XREF=gi:72278163 /DB_XREF=COT_EL_G08 /TID=Ghi.4687.1 /CNT=1 /FEA=EST /TIER=ConsEnd /STK=1 /UG=Ghi.4687 /UG_TITLE=Transcribed locus /REP_ORG=G. hirsutum
GraAffx.9604.1.S1_s_at	CO087680	---	15.2039	0	gb:CO087680 /DB_XREF=gi:48778314 /DB_XREF=GR__Ea06E05.r /CLONE=GR__Ea06E05 /TID=GraAffx.9604.1 /CNT=8 /FEA=EST /TIER=ConsEnd /STK=3 /NOTE=sequence(s) not in UniGene /REP_ORG=G. raimondii
GhiAffx.44148.1.S1_at	DW511365.1	Ghi.15809	15.1719	0.0333442	gb:DW511365.1 dbest_id:35117148 /TID=GhiAffx.44148.1 /CNT=6 /FEA=EST /TIER=ConsEnd /STK=1 /NOTE=sequence(s) not in UniGene /REP_ORG=
Ghi.3411.1.A1_a_at	DT049647	Ghi.8846	15.15	0	gb:DT049647 /DB_XREF=gi:72274419 /DB_XREF=COT_DP_E06 /TID=Ghi.3411.1 /CNT=1 /FEA=EST /TIER=ConsEnd /STK=1 /UG=Ghi.3411 /UG_TITLE=Transcribed locus, weakly similar to NP_179895.2 ubiquitin-protein ligase (Arabidopsis thaliana) /REP_ORG=G. hirsutum
Gra.2101.1.A1_s_at	CO111981	Gra.2101	15.0409	0	gb:CO111981 /DB_XREF=gi:48810668 /DB_XREF=GR__Eb0048F21.r /CLONE=GR__Eb0048F21 /TID=Gra.2101.1 /CNT=4 /FEA=EST /TIER=ConsEnd /STK=1 /UG=Gra.2101 /UG_TITLE=Transcribed locus, moderately similar to NP_197938.2 zinc finger (C3HC4-type RING finger) family protein (Arabidopsis thaliana) /REP_ORG=G. raimondii
GraAffx.20389.1.S1_at	CO126813	---	14.8857	0	gb:CO126813 /DB_XREF=gi:48828423 /DB_XREF=GR__Eb11A19.r /CLONE=GR__Eb11A19 /TID=GraAffx.20389.1 /CNT=2 /FEA=EST /TIER=ConsEnd /STK=1 /NOTE=sequence(s) not in UniGene /REP_ORG=G. raimondii
Ghi.3995.3.S1_at	DV849182	Ghi.3995	14.6064	0	gb:DV849182 /DB_XREF=gi:82755620 /DB_XREF=GH_LSL07H08.f /CLONE=GH_LSL07H08 /TID=Ghi.3995.3 /CNT=1 /FEA=EST /TIER=ConsEnd /STK=0 /UG=Ghi.3995 /UG_TITLE=Transcribed locus, weakly similar to XP_537919.2 PREDICTED: hypothetical protein XP_537919 (Canis familiaris) /REP_ORG=G. hirsutum
GhiAffx.13234.2.S1_x_at	DW504839.1	Ghi.13700	14.5369	0	gb:DW504839.1 dbest_id:35110622 /TID=GhiAffx.13234.2 /CNT=3 /FEA=EST /TIER=ConsEnd /STK=0 /NOTE=sequence(s) not in UniGene /REP_ORG=
Ghi.744.3.S1_x_at	DT047031	Ghi.17528	14.3945	0	gb:DT047031 /DB_XREF=gi:72269188 /DB_XREF=COT_CJ_B06 /TID=Ghi.744.3 /CNT=2 /FEA=EST /TIER=ConsEnd /STK=2 /UG=Ghi.744 /UG_TITLE=Transcribed locus, moderately similar to NP_565026.1 unknown protein (Arabidopsis thaliana) /REP_ORG=G. hirsutum
Ghi.5662.1.A1_at	DT046903	Ghi.5662	14.2952	0	gb:DT046903 /DB_XREF=gi:72268834 /DB_XREF=COT_CE_D01 /TID=Ghi.5662.1 /CNT=1 /FEA=EST /TIER=ConsEnd /STK=1 /UG=Ghi.5662 /UG_TITLE=Transcribed locus /REP_ORG=G. hirsutum
GhiAffx.19697.1.A1_s_at	DW227913.1	Ghi.10366	13.7852	0.0366566	gb:DW227913.1 dbest_id:34832085 /TID=GhiAffx.19697.1 /CNT=3 /FEA=EST /TIER=ConsEnd /STK=1 /NOTE=sequence(s) not in UniGene /REP_ORG=
Ghi.382.1.S1_at	DT456172	Ghi.382	13.7436	0	gb:DT456172 /DB_XREF=gi:73847152 /DB_XREF=GH_ON12E06.f /CLONE=GH_ON12E06 /TID=Ghi.382.1 /CNT=3 /FEA=EST /TIER=ConsEnd /STK=0 /UG=Ghi.382 /UG_TITLE=Transcribed locus, weakly similar to NP_914949.1 serinethreonine protein kinase-like protein (Oryza sativa (japonica cultivar-group)) /REP_ORG=G. hirsutum
Ghi.311.2.A1_x_at	DT457716	Ghi.16317	13.7055	0	gb:DT457716 /DB_XREF=gi:73848696 /DB_XREF=GH_ON34P14.r /CLONE=GH_ON34P14 /TID=Ghi.311.2 /CNT=5 /FEA=EST /TIER=ConsEnd /STK=1 /UG=Ghi.311 /UG_TITLE=Transcribed locus, weakly similar to NP_187323.2 unknown protein (Arabidopsis thaliana) /REP_ORG=G. hirsutum
Ghi.382.1.A1_s_at	DT456762	Ghi.382	13.491	0	gb:DT456762 /DB_XREF=gi:73847742 /DB_XREF=GH_ON33G11.r /CLONE=GH_ON33G11 /TID=Ghi.382.1 /CNT=3 /FEA=EST /TIER=ConsEnd /STK=0 /UG=Ghi.382 /UG_TITLE=Transcribed locus, weakly similar to NP_914949.1 serinethreonine protein kinase-like protein (Oryza sativa (japonica cultivar-group)) /REP_ORG=G. hirsutum
GhiAffx.2250.1.A1_at	DW237394.1	---	13.4391	0	gb:DW237394.1 dbest_id:34841560 /TID=GhiAffx.2250.1 /CNT=2 /FEA=EST /TIER=ConsEnd /STK=2 /NOTE=sequence(s) not in UniGene /REP_ORG=
Ghi.3092.1.S1_at	DN759893	Ghi.3092	13.4088	0	gb:DN759893 /DB_XREF=gi:84145651 /DB_XREF=G.hir-stem 2400 /TID=Ghi.3092.1 /CNT=3 /FEA=EST /TIER=ConsEnd /STK=0 /UG=Ghi.3092 /UG_TITLE=Transcribed locus, weakly similar to NP_176883.3 ATP binding nucleoside-triphosphatase nucleotide binding (Arabidopsis thaliana) /REP_ORG=G. hirsutum
GhiAffx.50107.1.S1_at	DW236250.1	Ghi.19509	13.344	0	gb:DW236250.1 dbest_id:34840416 /TID=GhiAffx.50107.1 /CNT=2 /FEA=EST /TIER=ConsEnd /STK=0 /NOTE=sequence(s) not in UniGene /REP_ORG=
Ghi.19.1.S1_at	DR463675	Ghi.19	13.1969	0	gb:DR463675 /DB_XREF=gi:84175027 /DB_XREF=CM120H12 /TID=Ghi.19.1 /CNT=1 /FEA=EST /TIER=ConsEnd /STK=0 /UG=Ghi.19 /UG_TITLE=Transcribed locus /REP_ORG=G. hirsutum
GhiAffx.48901.1.S1_at	DW518199.1	---	13.0864	0	gb:DW518199.1 dbest_id:35123982 /TID=GhiAffx.48901.1 /CNT=3 /FEA=EST /TIER=ConsEnd /STK=1 /NOTE=sequence(s) not in UniGene /REP_ORG=
Gra.610.1.S1_x_at	CO091707	Gra.610	13.0776	0	gb:CO091707 /DB_XREF=gi:48790393 /DB_XREF=GR__Ea12F13.f /CLONE=GR__Ea12F13 /TID=Gra.610.1 /CNT=6 /FEA=EST /TIER=ConsEnd /STK=3 /UG=Gra.610 /UG_TITLE=Transcribed locus, moderately similar to XP_479153.1 elongation factor 1 beta (Oryza sativa (japonica cultivar-group)) /REP_ORG=G. raimondii
Ghi.3997.1.A1_at	DT457438	Ghi.3997	12.9391	0	gb:DT457438 /DB_XREF=gi:73848418 /DB_XREF=GH_ON34I23.r /CLONE=GH_ON34I23 /TID=Ghi.3997.1 /CNT=2 /FEA=EST /TIER=ConsEnd /STK=1 /UG=Ghi.3997 /UG_TITLE=Transcribed locus /REP_ORG=G. hirsutum
Ghi.8862.1.S1_at	DT456334	Ghi.8862	12.9182	0	gb:DT456334 /DB_XREF=gi:73847314 /DB_XREF=GH_ON14F01.f /CLONE=GH_ON14F01 /TID=Ghi.8862.1 /CNT=3 /FEA=EST /TIER=ConsEnd /STK=0 /UG=Ghi.8862 /UG_TITLE=Transcribed locus /REP_ORG=G. hirsutum
Ghi.3961.2.S1_at	DT459717	Ghi.19453	12.8975	0	gb:DT459717 /DB_XREF=gi:73850697 /DB_XREF=GH_ON38C04.r /CLONE=GH_ON38C04 /TID=Ghi.3961.2 /CNT=2 /FEA=EST /TIER=ConsEnd /STK=0 /UG=Ghi.3961 /UG_TITLE=Transcribed locus /REP_ORG=G. hirsutum
Gra.1939.3.A1_s_at	CO086149	Gra.1939	12.7752	0	gb:CO086149 /DB_XREF=gi:48776783 /DB_XREF=GR__Ea03O21.r /CLONE=GR__Ea03O21 /TID=Gra.1939.3 /CNT=5 /FEA=EST /TIER=ConsEnd /STK=0 /UG=Gra.1939 /UG_TITLE=Transcribed locus /REP_ORG=G. raimondii
Ghi.5125.1.A1_s_at	DR461163	Ghi.5125	12.6901	0	gb:DR461163 /DB_XREF=gi:84172515 /DB_XREF=CM094E03 /TID=Ghi.5125.1 /CNT=3 /FEA=EST /TIER=ConsEnd /STK=2 /UG=Ghi.5125 /UG_TITLE=Transcribed locus /REP_ORG=G. hirsutum
Ghi.5148.1.S1_x_at	DT048872	Ghi.5148	12.6772	0	gb:DT048872 /DB_XREF=gi:72272878 /DB_XREF=COT_DG_A06 /TID=Ghi.5148.1 /CNT=5 /FEA=EST /TIER=ConsEnd /STK=0 /UG=Ghi.5148 /UG_TITLE=Transcribed locus, strongly similar to NP_190281.1 ATPHS2; phosphorylase transferase, transferring glycosyl groups (Arabidopsis thaliana) /REP_ORG=G. hirsutum
GhiAffx.6505.1.S1_s_at	DW501305.1	Ghi.17754	12.327	0	gb:DW501305.1 dbest_id:35105733 /TID=GhiAffx.6505.1 /CNT=3 /FEA=EST /TIER=ConsEnd /STK=0 /NOTE=sequence(s) not in UniGene /REP_ORG=
Ghi.9297.1.S1_at	DT527050	Ghi.9297	12.1709	0	gb:DT527050 /DB_XREF=gi:73943742 /DB_XREF=GH_OCF04B12.f /CLONE=GH_OCF04B12 /TID=Ghi.9297.1 /CNT=3 /FEA=EST /TIER=ConsEnd /STK=0 /UG=Ghi.9297 /UG_TITLE=Transcribed locus /REP_ORG=G. hirsutum
Ghi.6903.1.A1_at	CA992674	Ghi.6903	12.0943	0.0238141	gb:CA992674 /DB_XREF=gi:31072395 /DB_XREF=pAR0040 /TID=Ghi.6903.1 /CNT=1 /FEA=EST /TIER=ConsEnd /STK=0 /UG=Ghi.6903 /UG_TITLE=Transcribed locus /REP_ORG=G. hirsutum
GhiAffx.35253.1.S1_at	DW229023.1	Ghi.11001	12.0538	0	gb:DW229023.1 dbest_id:34833195 /TID=GhiAffx.35253.1 /CNT=3 /FEA=EST /TIER=ConsEnd /STK=1 /NOTE=sequence(s) not in UniGene /REP_ORG=
Ghi.5731.1.A1_at	DT046465	Ghi.5731	12.0069	0	gb:DT046465 /DB_XREF=gi:72267838 /DB_XREF=COT_AB_B10 /TID=Ghi.5731.1 /CNT=3 /FEA=EST /TIER=ConsEnd /STK=0 /UG=Ghi.5731 /UG_TITLE=Transcribed locus /REP_ORG=G. hirsutum
Ghi.4235.1.S1_at	DT456120	Ghi.4235	12.0036	0	gb:DT456120 /DB_XREF=gi:73847100 /DB_XREF=GH_ON11H12.f /CLONE=GH_ON11H12 /TID=Ghi.4235.1 /CNT=2 /FEA=EST /TIER=ConsEnd /STK=0 /UG=Ghi.4235 /UG_TITLE=Transcribed locus /REP_ORG=G. hirsutum
Ghi.5341.1.A1_at	DT047991	Ghi.5341	11.9414	0	gb:DT047991 /DB_XREF=gi:72271109 /DB_XREF=COT_CU_H12 /TID=Ghi.5341.1 /CNT=2 /FEA=EST /TIER=ConsEnd /STK=2 /UG=Ghi.5341 /UG_TITLE=Transcribed locus /REP_ORG=G. hirsutum
Ghi.3411.4.S1_s_at	DT573951	Ghi.6814	11.9214	0	gb:DT573951 /DB_XREF=gi:78353677 /DB_XREF=EST1084591 /TID=Ghi.3411.4 /CNT=3 /FEA=EST /TIER=ConsEnd /STK=0 /UG=Ghi.3411 /UG_TITLE=Transcribed locus, weakly similar to NP_179895.2 ubiquitin-protein ligase (Arabidopsis thaliana) /REP_ORG=G. hirsutum
Ghi.4190.1.S1_at	DT456272	Ghi.4190	11.8867	0	gb:DT456272 /DB_XREF=gi:73847252 /DB_XREF=GH_ON13G07.f /CLONE=GH_ON13G07 /TID=Ghi.4190.1 /CNT=3 /FEA=EST /TIER=ConsEnd /STK=0 /UG=Ghi.4190 /UG_TITLE=Transcribed locus /REP_ORG=G. hirsutum
Ghi.3808.1.A1_at	DT461567	Ghi.3808	11.8332	0	gb:DT461567 /DB_XREF=gi:73858828 /DB_XREF=GH_CHX01H09.x /CLONE=GH_CHX01H09 /TID=Ghi.3808.1 /CNT=1 /FEA=EST /TIER=ConsEnd /STK=0 /UG=Ghi.3808 /UG_TITLE=Transcribed locus /REP_ORG=G. hirsutum
Ghi.2230.3.A1_at	DT462452	Ghi.4918	11.7405	0	gb:DT462452 /DB_XREF=gi:73859713 /DB_XREF=GH_CHX12B19.r /CLONE=GH_CHX12B19 /TID=Ghi.2230.3 /CNT=1 /FEA=EST /TIER=ConsEnd /STK=1 /UG=Ghi.2230 /UG_TITLE=Transcribed locus, weakly similar to NP_199927.1 RNA binding pseudouridine synthase pseudouridylate synthase (Arabidopsis thaliana) /REP_ORG=G. hirsutum
Ghi.2017.2.A1_s_at	DT463271	Ghi.17856	11.7018	0	gb:DT463271 /DB_XREF=gi:73860532 /DB_XREF=GH_CHX13F03.r /CLONE=GH_CHX13F03 /TID=Ghi.2017.2 /CNT=1 /FEA=EST /TIER=ConsEnd /STK=1 /UG=Ghi.2017 /UG_TITLE=Transcribed locus, moderately similar to NP_190918.3 RSZ32; nucleic acid binding (Arabidopsis thaliana) /REP_ORG=G. hirsutum
Ghi.1078.1.S1_x_at	DN818044	Ghi.1302	11.6025	0	gb:DN818044 /DB_XREF=gi:84156818 /DB_XREF=G.hir-seedling 1244 /TID=Ghi.1078.1 /CNT=1 /FEA=EST /TIER=ConsEnd /STK=0 /UG=Ghi.1078 /UG_TITLE=Transcribed locus /REP_ORG=G. hirsutum
Ghi.744.2.S1_x_at	DT465771	Ghi.17528	11.4022	0	gb:DT465771 /DB_XREF=gi:73863032 /DB_XREF=GH_CHX17O14.r /CLONE=GH_CHX17O14 /TID=Ghi.744.2 /CNT=3 /FEA=EST /TIER=ConsEnd /STK=1 /UG=Ghi.744 /UG_TITLE=Transcribed locus, moderately similar to NP_565026.1 unknown protein (Arabidopsis thaliana) /REP_ORG=G. hirsutum
Ghi.9130.1.A1_s_at	DT462367	Ghi.9130	11.3746	0	gb:DT462367 /DB_XREF=gi:73859628 /DB_XREF=GH_CHX11H03.x /CLONE=GH_CHX11H03 /TID=Ghi.9130.1 /CNT=4 /FEA=EST /TIER=ConsEnd /STK=0 /UG=Ghi.9130 /UG_TITLE=Transcribed locus /REP_ORG=G. hirsutum
Ghi.279.1.S1_at	DR461178	Ghi.279	11.3456	0	gb:DR461178 /DB_XREF=gi:84172530 /DB_XREF=CM094F06 /TID=Ghi.279.1 /CNT=1 /FEA=EST /TIER=ConsEnd /STK=1 /UG=Ghi.279 /UG_TITLE=Transcribed locus /REP_ORG=G. hirsutum
Gra.2961.2.A1_x_at	CO080037	Gra.2961	11.3217	0	gb:CO080037 /DB_XREF=gi:48749518 /DB_XREF=GR__Ea43D21.r /CLONE=GR__Ea43D21 /TID=Gra.2961.2 /CNT=3 /FEA=EST /TIER=ConsEnd /STK=1 /UG=Gra.2961 /UG_TITLE=Transcribed locus, moderately similar to NP_171994.1 1-aminocyclopropane-1-carboxylate oxidase ACC oxidase ethylene-forming enzyme (ACO) (EAT1) (Arabidopsis thaliana) /REP_ORG=G. raimondii
Ghi.9408.1.S1_at	DT463176	Ghi.9408	11.286	0.333638	gb:DT463176 /DB_XREF=gi:73860437 /DB_XREF=GH_CHX13C22.r /CLONE=GH_CHX13C22 /TID=Ghi.9408.1 /CNT=8 /FEA=EST /TIER=ConsEnd /STK=1 /UG=Ghi.9408 /UG_TITLE=Transcribed locus, weakly similar to NP_915570.1 putative cytochrome P450 (Oryza sativa (japonica cultivar-group)) /REP_ORG=G. hirsutum
GraAffx.10408.1.A1_s_at	CO080703	---	11.2548	0	gb:CO080703 /DB_XREF=gi:48750184 /DB_XREF=GR__Ea44F10.r /CLONE=GR__Ea44F10 /TID=GraAffx.10408.1 /CNT=1 /FEA=EST /TIER=ConsEnd /STK=1 /NOTE=sequence(s) not in UniGene /REP_ORG=G. raimondii
GhiAffx.40297.1.A1_at	DW510087.1	Ghi.11489	11.1964	0	gb:DW510087.1 dbest_id:35115870 /TID=GhiAffx.40297.1 /CNT=4 /FEA=EST /TIER=ConsEnd /STK=1 /NOTE=sequence(s) not in UniGene /REP_ORG=
Ghi.3076.1.S1_at	DT455740	Ghi.3588	11.1482	0	gb:DT455740 /DB_XREF=gi:73846720 /DB_XREF=GH_ON02H09.f /CLONE=GH_ON02H09 /TID=Ghi.3076.1 /CNT=3 /FEA=EST /TIER=ConsEnd /STK=0 /UG=Ghi.3076 /UG_TITLE=Transcribed locus /REP_ORG=G. hirsutum
Ghi.9402.2.S1_at	DR454339	Ghi.9402	11.1002	0	gb:DR454339 /DB_XREF=gi:84165691 /DB_XREF=CM022G03 /TID=Ghi.9402.2 /CNT=7 /FEA=EST /TIER=ConsEnd /STK=0 /UG=Ghi.9402 /UG_TITLE=Transcribed locus /REP_ORG=G. hirsutum
GhiAffx.1589.5.S1_at	DW508620.1	---	11.0454	0	gb:DW508620.1 dbest_id:35114403 /TID=GhiAffx.1589.5 /CNT=3 /FEA=EST /TIER=ConsEnd /STK=1 /NOTE=sequence(s) not in UniGene /REP_ORG=
GraAffx.29146.1.S1_s_at	CO084431	---	11.0167	0	gb:CO084431 /DB_XREF=gi:48775065 /DB_XREF=GR__Ea01A22.r /CLONE=GR__Ea01A22 /TID=GraAffx.29146.1 /CNT=2 /FEA=EST /TIER=ConsEnd /STK=1 /NOTE=sequence(s) not in UniGene /REP_ORG=G. raimondii
Ghi.5201.1.A1_at	DT048660	Ghi.5201	10.9622	0	gb:DT048660 /DB_XREF=gi:72272456 /DB_XREF=COT_DD_B11 /TID=Ghi.5201.1 /CNT=1 /FEA=EST /TIER=ConsEnd /STK=1 /UG=Ghi.5201 /UG_TITLE=Transcribed locus, weakly similar to NP_190441.1 transferase (Arabidopsis thaliana) /REP_ORG=G. hirsutum
Ghi.502.1.S1_at	DR458828	Ghi.502	10.889	0	gb:DR458828 /DB_XREF=gi:84170180 /DB_XREF=CM069H05 /TID=Ghi.502.1 /CNT=1 /FEA=EST /TIER=ConsEnd /STK=0 /UG=Ghi.502 /UG_TITLE=Transcribed locus /REP_ORG=G. hirsutum
Ghi.5556.1.A1_at	DT047337	Ghi.5556	10.6966	0	gb:DT047337 /DB_XREF=gi:72269802 /DB_XREF=COT_CM_H09 /TID=Ghi.5556.1 /CNT=1 /FEA=EST /TIER=ConsEnd /STK=1 /UG=Ghi.5556 /UG_TITLE=Transcribed locus /REP_ORG=G. hirsutum
GhiAffx.60321.1.S1_x_at	DW503718.1	---	10.6934	0	gb:DW503718.1 dbest_id:35108146 /TID=GhiAffx.60321.1 /CNT=2 /FEA=EST /TIER=ConsEnd /STK=1 /NOTE=sequence(s) not in UniGene /REP_ORG=
Ghi.6539.2.A1_at	DR461642	Ghi.9213	10.5612	0	gb:DR461642 /DB_XREF=gi:84172994 /DB_XREF=CM099E11 /TID=Ghi.6539.2 /CNT=2 /FEA=EST /TIER=ConsEnd /STK=0 /UG=Ghi.6539 /UG_TITLE=Transcribed locus, weakly similar to NP_181529.1 unknown protein (Arabidopsis thaliana) /REP_ORG=G. hirsutum
Ghi.3690.1.A1_x_at	DT462273	Ghi.3690	10.4875	0	gb:DT462273 /DB_XREF=gi:73859534 /DB_XREF=GH_CHX10G08.x /CLONE=GH_CHX10G08 /TID=Ghi.3690.1 /CNT=3 /FEA=EST /TIER=ConsEnd /STK=0 /UG=Ghi.3690 /UG_TITLE=Transcribed locus /REP_ORG=G. hirsutum
Ghi.1389.1.S1_s_at	DR463500	Ghi.1389	10.4493	0	gb:DR463500 /DB_XREF=gi:84174852 /DB_XREF=CM119B03 /TID=Ghi.1389.1 /CNT=2 /FEA=EST /TIER=ConsEnd /STK=0 /UG=Ghi.1389 /UG_TITLE=Transcribed locus /REP_ORG=G. hirsutum
GhiAffx.9693.1.A1_at	DR455361	Ghi.12717	10.3705	0	gb:DR455361 /DB_XREF=gi:84166713 /DB_XREF=CM033D11 /TID=GhiAffx.9693.1 /CNT=4 /FEA=EST /TIER=ConsEnd /STK=0 /NOTE=sequence(s) not in UniGene /REP_ORG=G. hirsutum
Ghi.10782.1.S1_s_at	DN816834	Ghi.10782	10.2724	0	gb:DN816834 /DB_XREF=gi:84155608 /DB_XREF=G.hir-seedling 34 /TID=Ghi.10782.1 /CNT=5 /FEA=EST /TIER=ConsEnd /STK=0 /UG=Ghi.10782 /UG_TITLE=Transcribed locus, moderately similar to NP_197938.2 protein binding ubiquitin-protein ligase zinc ion binding (Arabidopsis thaliana) /REP_ORG=G. hirsutum
Ghi.10491.1.S1_at	DN758293	Ghi.10491	10.2392	0	gb:DN758293 /DB_XREF=gi:84144051 /DB_XREF=G.hir-stem 797 /TID=Ghi.10491.1 /CNT=5 /FEA=EST /TIER=ConsEnd /STK=0 /UG=Ghi.10491 /UG_TITLE=Transcribed locus /REP_ORG=G. hirsutum
Ghi.8983.2.S1_at	DT554125	Ghi.8983	10.1788	0	gb:DT554125 /DB_XREF=gi:78333851 /DB_XREF=EST1064765 /TID=Ghi.8983.2 /CNT=6 /FEA=EST /TIER=ConsEnd /STK=0 /UG=Ghi.8983 /UG_TITLE=Transcribed locus, weakly similar to NP_191681.1 oxidoreductase (Arabidopsis thaliana) /REP_ORG=G. hirsutum
GraAffx.18318.1.A1_x_at	CO124588	---	10.1679	0	gb:CO124588 /DB_XREF=gi:48823275 /DB_XREF=GR__Eb07J10.r /CLONE=GR__Eb07J10 /TID=GraAffx.18318.1 /CNT=6 /FEA=EST /TIER=ConsEnd /STK=1 /NOTE=sequence(s) not in UniGene /REP_ORG=G. raimondii
GhiAffx.13234.1.A1_a_at	DW236946.1	Ghi.13700	10.1413	0	gb:DW236946.1 dbest_id:34841112 /TID=GhiAffx.13234.1 /CNT=2 /FEA=EST /TIER=ConsEnd /STK=1 /NOTE=sequence(s) not in UniGene /REP_ORG=
GhiAffx.26774.1.A1_s_at	DW243662.1	---	10.0702	0	gb:DW243662.1 dbest_id:34847828 /TID=GhiAffx.26774.1 /CNT=2 /FEA=EST /TIER=ConsEnd /STK=1 /NOTE=sequence(s) not in UniGene /REP_ORG=
GhiAffx.7786.1.S1_at	DW515953.1	Ghi.11257	10.0605	0	gb:DW515953.1 dbest_id:35121736 /TID=GhiAffx.7786.1 /CNT=4 /FEA=EST /TIER=ConsEnd /STK=0 /NOTE=sequence(s) not in UniGene /REP_ORG=
Ghi.4492.1.A1_at	DT052629	Ghi.4492	10.0595	0	gb:DT052629 /DB_XREF=gi:72280708 /DB_XREF=COT_FE_G02 /TID=Ghi.4492.1 /CNT=2 /FEA=EST /TIER=ConsEnd /STK=2 /UG=Ghi.4492 /UG_TITLE=Transcribed locus /REP_ORG=G. hirsutum
Gra.689.1.S1_a_at	CO077837	Gra.689	10.0526	0	gb:CO077837 /DB_XREF=gi:48747318 /DB_XREF=GR__Ea39M23.r /CLONE=GR__Ea39M23 /TID=Gra.689.1 /CNT=12 /FEA=EST /TIER=ConsEnd /STK=1 /UG=Gra.689 /UG_TITLE=Transcribed locus, weakly similar to NP_172134.1 31.2 kDa small heat shock family protein hsp20 family protein (Arabidopsis thaliana) /REP_ORG=G. raimondii
Ghi.729.1.A1_at	DR455493	Ghi.729	10.043	0	gb:DR455493 /DB_XREF=gi:84166845 /DB_XREF=CM034G12 /TID=Ghi.729.1 /CNT=1 /FEA=EST /TIER=ConsEnd /STK=0 /UG=Ghi.729 /UG_TITLE=Transcribed locus /REP_ORG=G. hirsutum
Ghi.3729.1.A1_s_at	DT462226	Ghi.3729	9.9908	0	gb:DT462226 /DB_XREF=gi:73859487 /DB_XREF=GH_CHX10B12.x /CLONE=GH_CHX10B12 /TID=Ghi.3729.1 /CNT=1 /FEA=EST /TIER=ConsEnd /STK=0 /UG=Ghi.3729 /UG_TITLE=Transcribed locus /REP_ORG=G. hirsutum
GhiAffx.1589.46.S1_s_at	DW235449.1	Ghi.17807	9.93239	0.0333442	gb:DW235449.1 dbest_id:34839615 /TID=GhiAffx.1589.46 /CNT=5 /FEA=EST /TIER=ConsEnd /STK=2 /NOTE=sequence(s) not in UniGene /REP_ORG=
GhiAffx.28265.1.S1_at	DT463800	---	9.91421	0	gb:DT463800 /DB_XREF=gi:73861061 /DB_XREF=GH_CHX14C21.r /CLONE=GH_CHX14C21 /TID=GhiAffx.28265.1 /CNT=2 /FEA=EST /TIER=ConsEnd /STK=1 /NOTE=sequence(s) not in UniGene /REP_ORG=G. hirsutum
GhiAffx.63874.1.S1_at	DW241013.1	Ghi.13355	9.89917	0	gb:DW241013.1 dbest_id:34845179 /TID=GhiAffx.63874.1 /CNT=4 /FEA=EST /TIER=ConsEnd /STK=0 /NOTE=sequence(s) not in UniGene /REP_ORG=
Ghi.3703.1.A1_at	DR458062	Ghi.2844	9.88341	0	gb:DR458062 /DB_XREF=gi:84169414 /DB_XREF=CM061G09 /TID=Ghi.3703.1 /CNT=3 /FEA=EST /TIER=ConsEnd /STK=0 /UG=Ghi.3703 /UG_TITLE=Transcribed locus, moderately similar to XP_469644.1 cyclin H-1 (Oryza sativa (japonica cultivar-group)) /REP_ORG=G. hirsutum
GhiAffx.25338.1.A1_at	DW515811.1	---	9.80937	0	gb:DW515811.1 dbest_id:35121594 /TID=GhiAffx.25338.1 /CNT=2 /FEA=EST /TIER=ConsEnd /STK=1 /NOTE=sequence(s) not in UniGene /REP_ORG=
GhiAffx.31457.1.S1_at	DT461202	---	9.80903	0	gb:DT461202 /DB_XREF=gi:73852182 /DB_XREF=GH_ON40I11.r /CLONE=GH_ON40I11 /TID=GhiAffx.31457.1 /CNT=2 /FEA=EST /TIER=ConsEnd /STK=1 /NOTE=sequence(s) not in UniGene /REP_ORG=G. hirsutum
Ghi.4010.2.S1_at	DR457107	Ghi.4010	9.76181	0	gb:DR457107 /DB_XREF=gi:84168459 /DB_XREF=CM051G07 /TID=Ghi.4010.2 /CNT=1 /FEA=EST /TIER=ConsEnd /STK=0 /UG=Ghi.4010 /UG_TITLE=Transcribed locus, moderately similar to NP_172558.1 unknown protein (Arabidopsis thaliana) /REP_ORG=G. hirsutum
GraAffx.22780.1.S1_s_at	CO105886	---	9.74309	0	gb:CO105886 /DB_XREF=gi:48804572 /DB_XREF=GR__Eb0036E15.r /CLONE=GR__Eb0036E15 /TID=GraAffx.22780.1 /CNT=4 /FEA=EST /TIER=ConsEnd /STK=2 /NOTE=sequence(s) not in UniGene /REP_ORG=G. raimondii
Ghi.2998.1.A1_x_at	DT052325	Ghi.2998	9.69494	0.0480414	gb:DT052325 /DB_XREF=gi:72280020 /DB_XREF=COT_FB_A02 /TID=Ghi.2998.1 /CNT=5 /FEA=EST /TIER=ConsEnd /STK=2 /UG=Ghi.2998 /UG_TITLE=Transcribed locus, weakly similar to NP_566777.1 AOC2 (ALLENE OXIDE CYCLASE 2) (Arabidopsis thaliana) /REP_ORG=G. hirsutum
GraAffx.21652.1.A1_x_at	CO106284	---	9.64638	0	gb:CO106284 /DB_XREF=gi:48804970 /DB_XREF=GR__Eb0036N15.r /CLONE=GR__Eb0036N15 /TID=GraAffx.21652.1 /CNT=4 /FEA=EST /TIER=ConsEnd /STK=1 /NOTE=sequence(s) not in UniGene /REP_ORG=G. raimondii
Ghi.5204.1.A1_at	DT048652	Ghi.5204	9.60366	0	gb:DT048652 /DB_XREF=gi:72272440 /DB_XREF=COT_DD_B03 /TID=Ghi.5204.1 /CNT=2 /FEA=EST /TIER=ConsEnd /STK=2 /UG=Ghi.5204 /UG_TITLE=Transcribed locus, weakly similar to NP_198442.2 AMP binding catalytic (Arabidopsis thaliana) /REP_ORG=G. hirsutum
Ghi.4444.1.A1_at	DT052928	Ghi.6707	9.55301	0	gb:DT052928 /DB_XREF=gi:72281346 /DB_XREF=COT_FI_H08 /TID=Ghi.4444.1 /CNT=1 /FEA=EST /TIER=ConsEnd /STK=1 /UG=Ghi.4444 /UG_TITLE=Transcribed locus /REP_ORG=G. hirsutum
GhiAffx.43699.1.A1_at	DW240034.1	---	9.54631	0	gb:DW240034.1 dbest_id:34844200 /TID=GhiAffx.43699.1 /CNT=3 /FEA=EST /TIER=ConsEnd /STK=2 /NOTE=sequence(s) not in UniGene /REP_ORG=
GhiAffx.47990.1.S1_at	DW236910.1	Ghi.13040	9.47622	0	gb:DW236910.1 dbest_id:34841076 /TID=GhiAffx.47990.1 /CNT=3 /FEA=EST /TIER=ConsEnd /STK=1 /NOTE=sequence(s) not in UniGene /REP_ORG=
Gra.1164.1.S1_s_at	CO083245	Gra.2629	9.46442	0	gb:CO083245 /DB_XREF=gi:48752726 /DB_XREF=GR__Ea48D19.r /CLONE=GR__Ea48D19 /TID=Gra.1164.1 /CNT=4 /FEA=EST /TIER=ConsEnd /STK=1 /UG=Gra.1164 /UG_TITLE=Transcribed locus, moderately similar to NP_564180.1 gigantea protein (GI) (Arabidopsis thaliana) /REP_ORG=G. raimondii
GhiAffx.62164.1.S1_at	DW513395.1	Ghi.11360	9.40973	0	gb:DW513395.1 dbest_id:35119178 /TID=GhiAffx.62164.1 /CNT=3 /FEA=EST /TIER=ConsEnd /STK=1 /NOTE=sequence(s) not in UniGene /REP_ORG=
GhiAffx.13643.1.S1_at	DT051358	Ghi.1292	9.39271	0	gb:DT051358 /DB_XREF=gi:72278022 /DB_XREF=COT_EL_C02 /TID=GhiAffx.13643.1 /CNT=5 /FEA=EST /TIER=ConsEnd /STK=1 /NOTE=sequence(s) not in UniGene /REP_ORG=G. hirsutum
Ghi.5261.1.A1_at	DT048437	---	9.38222	0	gb:DT048437 /DB_XREF=gi:72271994 /DB_XREF=COT_DA_E08 /TID=Ghi.5261.1 /CNT=2 /FEA=EST /TIER=ConsEnd /STK=2 /UG=Ghi.5261 /UG_TITLE=Transcribed locus, weakly similar to NP_191728.2 nucleic acid binding (Arabidopsis thaliana) /REP_ORG=G. hirsutum
GhiAffx.60801.1.S1_at	DW497096.1	Ghi.11876	9.38092	0	gb:DW497096.1 dbest_id:35101524 /TID=GhiAffx.60801.1 /CNT=3 /FEA=EST /TIER=ConsEnd /STK=1 /NOTE=sequence(s) not in UniGene /REP_ORG=
Ghi.5456.1.A1_s_at	DT047687	Ghi.5456	9.37406	0	gb:DT047687 /DB_XREF=gi:72270506 /DB_XREF=COT_CR_A07 /TID=Ghi.5456.1 /CNT=1 /FEA=EST /TIER=ConsEnd /STK=1 /UG=Ghi.5456 /UG_TITLE=Transcribed locus /REP_ORG=G. hirsutum
GraAffx.32174.1.S1_s_at	CO075778	---	9.36034	0	gb:CO075778 /DB_XREF=gi:48745259 /DB_XREF=GR__Ea36L22.f /CLONE=GR__Ea36L22 /TID=GraAffx.32174.1 /CNT=2 /FEA=EST /TIER=ConsEnd /STK=0 /NOTE=sequence(s) not in UniGene /REP_ORG=G. raimondii
GhiAffx.2316.1.A1_at	DT051996	---	9.35233	0	gb:DT051996 /DB_XREF=gi:72279365 /DB_XREF=COT_ES_G12 /TID=GhiAffx.2316.1 /CNT=2 /FEA=EST /TIER=ConsEnd /STK=1 /NOTE=sequence(s) not in UniGene /REP_ORG=G. hirsutum
Ghi.7603.1.A1_at	AI729024	Ghi.7603	9.32294	0	gb:AI729024 /DB_XREF=gi:5047876 /DB_XREF=BNLGHi12394 /TID=Ghi.7603.1 /CNT=1 /FEA=EST /TIER=ConsEnd /STK=1 /UG=Ghi.7603 /UG_TITLE=Transcribed locus /REP_ORG=G. hirsutum
Ghi.3071.1.S1_s_at	DT527414	Ghi.3071	9.30599	0	gb:DT527414 /DB_XREF=gi:73944106 /DB_XREF=GH_OCF08D12.f /CLONE=GH_OCF08D12 /TID=Ghi.3071.1 /CNT=2 /FEA=EST /TIER=ConsEnd /STK=0 /UG=Ghi.3071 /UG_TITLE=Transcribed locus /REP_ORG=G. hirsutum
Ghi.4108.2.A1_s_at	DT458784	Ghi.4108	9.24106	0	gb:DT458784 /DB_XREF=gi:73849764 /DB_XREF=GH_ON36K15.r /CLONE=GH_ON36K15 /TID=Ghi.4108.2 /CNT=3 /FEA=EST /TIER=ConsEnd /STK=1 /UG=Ghi.4108 /UG_TITLE=Transcribed locus, weakly similar to NP_192835.1 unknown protein (Arabidopsis thaliana) /REP_ORG=G. hirsutum
GhiAffx.12918.1.S1_x_at	DT463521	Ghi.13617	9.2185	0	gb:DT463521 /DB_XREF=gi:73860782 /DB_XREF=GH_CHX13K21.r /CLONE=GH_CHX13K21 /TID=GhiAffx.12918.1 /CNT=2 /FEA=EST /TIER=ConsEnd /STK=1 /NOTE=sequence(s) not in UniGene /REP_ORG=G. hirsutum
Ghi.8544.1.S1_at	CA992872	Ghi.8544	9.18542	0	gb:CA992872 /DB_XREF=gi:31072593 /DB_XREF=pAR0318 /TID=Ghi.8544.1 /CNT=13 /FEA=EST /TIER=ConsEnd /STK=0 /UG=Ghi.8544 /UG_TITLE=Transcribed locus, moderately similar to NP_181474.2 catalytic hydrolase (Arabidopsis thaliana) /REP_ORG=G. hirsutum
GhiAffx.4043.12.A1_s_at	DW233918.1	Ghi.1394	9.07986	0	gb:DW233918.1 dbest_id:34838084 /TID=GhiAffx.4043.12 /CNT=4 /FEA=EST /TIER=ConsEnd /STK=1 /NOTE=sequence(s) not in UniGene /REP_ORG=
Ghi.2045.2.S1_x_at	DT459030	Ghi.2045	8.89099	0	gb:DT459030 /DB_XREF=gi:73850010 /DB_XREF=GH_ON37A16.r /CLONE=GH_ON37A16 /TID=Ghi.2045.2 /CNT=2 /FEA=EST /TIER=ConsEnd /STK=0 /UG=Ghi.2045 /UG_TITLE=Transcribed locus /REP_ORG=G. hirsutum
Ghi.5064.1.A1_x_at	DR460296	Ghi.19267	8.87311	0	gb:DR460296 /DB_XREF=gi:84171648 /DB_XREF=CM085D03 /TID=Ghi.5064.1 /CNT=2 /FEA=EST /TIER=ConsEnd /STK=0 /UG=Ghi.5064 /UG_TITLE=Transcribed locus, moderately similar to NP_198118.1 protein binding serine-type endopeptidase serine-type peptidase trypsin (Arabidopsis thaliana) /REP_ORG=G. hirsutum
GhiAffx.27778.1.S1_s_at	DW510329.1	Ghi.12637	8.85309	0	gb:DW510329.1 dbest_id:35116112 /TID=GhiAffx.27778.1 /CNT=3 /FEA=EST /TIER=ConsEnd /STK=1 /NOTE=sequence(s) not in UniGene /REP_ORG=
GhiAffx.7015.1.A1_s_at	DW236940.1	Ghi.2962	8.83865	0	gb:DW236940.1 dbest_id:34841106 /TID=GhiAffx.7015.1 /CNT=1 /FEA=EST /TIER=ConsEnd /STK=1 /NOTE=sequence(s) not in UniGene /REP_ORG=
Ghi.8756.1.A1_at	DT053578	Ghi.8756	8.72112	0	gb:DT053578 /DB_XREF=gi:72282636 /DB_XREF=COT_FS_A09 /TID=Ghi.8756.1 /CNT=2 /FEA=EST /TIER=ConsEnd /STK=2 /UG=Ghi.8756 /UG_TITLE=Transcribed locus /REP_ORG=G. hirsutum
GhiAffx.16630.2.S1_at	DW230292.1	Ghi.13706	8.67888	0	gb:DW230292.1 dbest_id:34834464 /TID=GhiAffx.16630.2 /CNT=3 /FEA=EST /TIER=ConsEnd /STK=0 /NOTE=sequence(s) not in UniGene /REP_ORG=
GraAffx.17279.1.A1_at	CO119436	---	8.64565	0	gb:CO119436 /DB_XREF=gi:48818123 /DB_XREF=GR__Eb022F17.f /CLONE=GR__Eb022F17 /TID=GraAffx.17279.1 /CNT=2 /FEA=EST /TIER=ConsEnd /STK=0 /NOTE=sequence(s) not in UniGene /REP_ORG=G. raimondii
GhiAffx.2217.1.S1_at	DW239431.1	Ghi.13735	8.64364	0	gb:DW239431.1 dbest_id:34843597 /TID=GhiAffx.2217.1 /CNT=3 /FEA=EST /TIER=ConsEnd /STK=0 /NOTE=sequence(s) not in UniGene /REP_ORG=
GraAffx.28260.1.A1_s_at	CO087055	---	8.64336	0	gb:CO087055 /DB_XREF=gi:48777689 /DB_XREF=GR__Ea05F13.r /CLONE=GR__Ea05F13 /TID=GraAffx.28260.1 /CNT=2 /FEA=EST /TIER=ConsEnd /STK=1 /NOTE=sequence(s) not in UniGene /REP_ORG=G. raimondii
Ghi.4540.1.A1_at	DT050584	Ghi.4540	8.59182	0	gb:DT050584 /DB_XREF=gi:72276336 /DB_XREF=COT_EB_D04 /TID=Ghi.4540.1 /CNT=4 /FEA=EST /TIER=ConsEnd /STK=3 /UG=Ghi.4540 /UG_TITLE=Transcribed locus /REP_ORG=G. hirsutum
Ghi.3442.3.S1_x_at	DN801695	Ghi.16317	8.58717	0	gb:DN801695 /DB_XREF=gi:84152340 /DB_XREF=G.hir-15-20 DAA bolls drought stressed 850 /TID=Ghi.3442.3 /CNT=2 /FEA=EST /TIER=ConsEnd /STK=0 /UG=Ghi.3442 /UG_TITLE=Transcribed locus, moderately similar to NP_563728.1 unknown protein (Arabidopsis thaliana) /REP_ORG=G. hirsutum
GhiAffx.2299.1.A1_at	DY985192	Ghi.13776	8.58151	0	gb:DY985192 /DB_XREF=gi:90523334 /DB_XREF=COT_FP_B11 /TID=GhiAffx.2299.1 /CNT=4 /FEA=EST /TIER=ConsEnd /STK=3 /NOTE=sequence(s) not in UniGene /REP_ORG=G. hirsutum
GhiAffx.44758.1.S1_at	DW520183.1	Ghi.11051	8.57477	0	gb:DW520183.1 dbest_id:35125966 /TID=GhiAffx.44758.1 /CNT=2 /FEA=EST /TIER=ConsEnd /STK=1 /NOTE=sequence(s) not in UniGene /REP_ORG=
Ghi.9568.1.S1_at	DT467159	Ghi.9568	8.57373	0	gb:DT467159 /DB_XREF=gi:73864420 /DB_XREF=GH_CHX19P11.r /CLONE=GH_CHX19P11 /TID=Ghi.9568.1 /CNT=5 /FEA=EST /TIER=ConsEnd /STK=1 /UG=Ghi.9568 /UG_TITLE=Transcribed locus, weakly similar to NP_178199.1 WRKY40; transcription factor (Arabidopsis thaliana) /REP_ORG=G. hirsutum
GhiAffx.19500.1.S1_at	DW243523.1	Ghi.13202	8.56912	0.403009	gb:DW243523.1 dbest_id:34847689 /TID=GhiAffx.19500.1 /CNT=4 /FEA=EST /TIER=ConsEnd /STK=0 /NOTE=sequence(s) not in UniGene /REP_ORG=
Ghi.3270.2.S1_at	DT461945	Ghi.3270	8.56535	0	gb:DT461945 /DB_XREF=gi:73859206 /DB_XREF=GH_CHX06F10.x /CLONE=GH_CHX06F10 /TID=Ghi.3270.2 /CNT=4 /FEA=EST /TIER=ConsEnd /STK=0 /UG=Ghi.3270 /UG_TITLE=Transcribed locus /REP_ORG=G. hirsutum
Ghi.9137.1.S1_at	DT463000	Ghi.9137	8.39526	0	gb:DT463000 /DB_XREF=gi:73860261 /DB_XREF=GH_CHX12O15.r /CLONE=GH_CHX12O15 /TID=Ghi.9137.1 /CNT=2 /FEA=EST /TIER=ConsEnd /STK=1 /UG=Ghi.9137 /UG_TITLE=Transcribed locus /REP_ORG=G. hirsutum
GhiAffx.41632.1.S1_at	DW504037.1	Ghi.1575	8.39272	0	gb:DW504037.1 dbest_id:35108465 /TID=GhiAffx.41632.1 /CNT=2 /FEA=EST /TIER=ConsEnd /STK=1 /NOTE=sequence(s) not in UniGene /REP_ORG=
Ghi.2079.1.A1_at	DN758452	Ghi.2079	8.384	0	gb:DN758452 /DB_XREF=gi:84144210 /DB_XREF=G.hir-stem 956 /TID=Ghi.2079.1 /CNT=2 /FEA=EST /TIER=ConsEnd /STK=0 /UG=Ghi.2079 /UG_TITLE=Transcribed locus /REP_ORG=G. hirsutum
Ghi.281.2.A1_at	DT457219	Ghi.15320	8.37302	0	gb:DT457219 /DB_XREF=gi:73848199 /DB_XREF=GH_ON34D14.r /CLONE=GH_ON34D14 /TID=Ghi.281.2 /CNT=1 /FEA=EST /TIER=ConsEnd /STK=1 /UG=Ghi.281 /UG_TITLE=Transcribed locus, moderately similar to NP_191771.1 ATP binding proline-tRNA ligase tRNA ligase (Arabidopsis thaliana) /REP_ORG=G. hirsutum
GhiAffx.13191.1.A1_at	DT459858	---	8.36291	0	gb:DT459858 /DB_XREF=gi:73850838 /DB_XREF=GH_ON38F24.r /CLONE=GH_ON38F24 /TID=GhiAffx.13191.1 /CNT=2 /FEA=EST /TIER=ConsEnd /STK=1 /NOTE=sequence(s) not in UniGene /REP_ORG=G. hirsutum
GhiAffx.24595.1.S1_at	DW511924.1	---	8.33328	0	gb:DW511924.1 dbest_id:35117707 /TID=GhiAffx.24595.1 /CNT=2 /FEA=EST /TIER=ConsEnd /STK=1 /NOTE=sequence(s) not in UniGene /REP_ORG=
Gra.1358.1.A1_at	CO126276	Gra.1358	8.29686	0	gb:CO126276 /DB_XREF=gi:48827886 /DB_XREF=GR__Eb10D10.r /CLONE=GR__Eb10D10 /TID=Gra.1358.1 /CNT=2 /FEA=EST /TIER=ConsEnd /STK=1 /UG=Gra.1358 /UG_TITLE=Transcribed locus, weakly similar to XP_478905.1 chitin-inducible gibberellin-responsive protein (Oryza sativa (japonica cultivar-group)) /REP_ORG=G. raimondii
Ghi.3162.1.A1_at	DT468909	Ghi.16586	8.29193	0	gb:DT468909 /DB_XREF=gi:73866171 /DB_XREF=GH_CHX22K09.r /CLONE=GH_CHX22K09 /TID=Ghi.3162.1 /CNT=1 /FEA=EST /TIER=ConsEnd /STK=1 /UG=Ghi.3162 /UG_TITLE=Transcribed locus, moderately similar to NP_188507.1 unknown protein (Arabidopsis thaliana) /REP_ORG=G. hirsutum
Ghi.764.1.S1_at	DR455070	Ghi.764	8.28287	0	gb:DR455070 /DB_XREF=gi:84166422 /DB_XREF=CM030D07 /TID=Ghi.764.1 /CNT=1 /FEA=EST /TIER=ConsEnd /STK=0 /UG=Ghi.764 /UG_TITLE=Transcribed locus, weakly similar to NP_190638.1 protein binding (Arabidopsis thaliana) /REP_ORG=G. hirsutum
GhiAffx.22093.1.S1_at	DW498854.1	---	8.26332	0	gb:DW498854.1 dbest_id:35103282 /TID=GhiAffx.22093.1 /CNT=2 /FEA=EST /TIER=ConsEnd /STK=1 /NOTE=sequence(s) not in UniGene /REP_ORG=
Ghi.7106.1.A1_at	AW186775	Ghi.17655	8.2607	0	gb:AW186775 /DB_XREF=gi:6481255 /DB_XREF=BNLGHi5020 /TID=Ghi.7106.1 /CNT=2 /FEA=EST /TIER=ConsEnd /STK=0 /UG=Ghi.7106 /UG_TITLE=Transcribed locus, weakly similar to NP_172300.2 unknown protein (Arabidopsis thaliana) /REP_ORG=G. hirsutum
GhiAffx.60651.1.S1_at	DW505405.1	Ghi.13681	8.26022	0	gb:DW505405.1 dbest_id:35111188 /TID=GhiAffx.60651.1 /CNT=3 /FEA=EST /TIER=ConsEnd /STK=1 /NOTE=sequence(s) not in UniGene /REP_ORG=
GhiAffx.53815.2.A1_at	DT458096	Ghi.11010	8.20558	0	gb:DT458096 /DB_XREF=gi:73849076 /DB_XREF=GH_ON35J08.r /CLONE=GH_ON35J08 /TID=GhiAffx.53815.2 /CNT=2 /FEA=EST /TIER=ConsEnd /STK=1 /NOTE=sequence(s) not in UniGene /REP_ORG=G. hirsutum
Ghi.5486.1.A1_s_at	DT047567	Ghi.5486	8.15	0	gb:DT047567 /DB_XREF=gi:72270262 /DB_XREF=COT_CP_E11 /TID=Ghi.5486.1 /CNT=2 /FEA=EST /TIER=ConsEnd /STK=1 /UG=Ghi.5486 /UG_TITLE=Transcribed locus /REP_ORG=G. hirsutum
Ghi.644.1.S1_at	DR456576	Ghi.644	8.05956	0	gb:DR456576 /DB_XREF=gi:84167928 /DB_XREF=CM046C01 /TID=Ghi.644.1 /CNT=1 /FEA=EST /TIER=ConsEnd /STK=0 /UG=Ghi.644 /UG_TITLE=Transcribed locus, weakly similar to NP_200440.1 PEX5; peroxisome targeting signal-1 binding (Arabidopsis thaliana) /REP_ORG=G. hirsutum
Ghi.5677.1.A1_at	DT046807	Ghi.5677	8.05302	0	gb:DT046807 /DB_XREF=gi:72268562 /DB_XREF=COT_CC_H09 /TID=Ghi.5677.1 /CNT=1 /FEA=EST /TIER=ConsEnd /STK=1 /UG=Ghi.5677 /UG_TITLE=Transcribed locus /REP_ORG=G. hirsutum
GhiAffx.6505.1.A1_at	DT459238	Ghi.17754	7.94553	0	gb:DT459238 /DB_XREF=gi:73850218 /DB_XREF=GH_ON37F21.r /CLONE=GH_ON37F21 /TID=GhiAffx.6505.1 /CNT=3 /FEA=EST /TIER=ConsEnd /STK=1 /NOTE=sequence(s) not in UniGene /REP_ORG=G. hirsutum
GhiAffx.46689.1.S1_at	DN779370	---	7.92511	0	gb:DN779370 /DB_XREF=gi:62296046 /DB_XREF=CFUS8.3D06 /CLONE=CFUS8.3D06 /TID=GhiAffx.46689.1 /CNT=2 /FEA=EST /TIER=ConsEnd /STK=0 /NOTE=sequence(s) not in UniGene /REP_ORG=G. hirsutum
Ghi.2230.2.S1_at	DT543228	Ghi.17986	7.92296	0	gb:DT543228 /DB_XREF=gi:78322954 /DB_XREF=EST1053868 /TID=Ghi.2230.2 /CNT=5 /FEA=EST /TIER=ConsEnd /STK=0 /UG=Ghi.2230 /UG_TITLE=Transcribed locus, weakly similar to NP_199927.1 RNA binding pseudouridine synthase pseudouridylate synthase (Arabidopsis thaliana) /REP_ORG=G. hirsutum
Ghi.3615.2.A1_x_at	DT461611	Ghi.3615	7.86086	0	gb:DT461611 /DB_XREF=gi:73858872 /DB_XREF=GH_CHX02D07.x /CLONE=GH_CHX02D07 /TID=Ghi.3615.2 /CNT=1 /FEA=EST /TIER=ConsEnd /STK=0 /UG=Ghi.3615 /UG_TITLE=Transcribed locus, weakly similar to NP_180484.2 unknown protein (Arabidopsis thaliana) /REP_ORG=G. hirsutum
GhiAffx.8694.1.S1_a_at	DW499451.1	---	7.82872	0	gb:DW499451.1 dbest_id:35103879 /TID=GhiAffx.8694.1 /CNT=2 /FEA=EST /TIER=ConsEnd /STK=1 /NOTE=sequence(s) not in UniGene /REP_ORG=
Ghi.2133.1.S1_s_at	AI731478	Ghi.3260	7.81948	0	gb:AI731478 /DB_XREF=gi:5050330 /DB_XREF=BNLGHi9875 /TID=Ghi.2133.1 /CNT=4 /FEA=EST /TIER=ConsEnd /STK=0 /UG=Ghi.2133 /UG_TITLE=Transcribed locus, weakly similar to NP_568107.1 APRR7 (PSEUDO-RESPONSE REGULATOR 7); transcription regulator (Arabidopsis thaliana) /REP_ORG=G. hirsutum
Ghi.8862.1.A1_at	DT457015	Ghi.8862	7.81406	0	gb:DT457015 /DB_XREF=gi:73847995 /DB_XREF=GH_ON33N23.r /CLONE=GH_ON33N23 /TID=Ghi.8862.1 /CNT=3 /FEA=EST /TIER=ConsEnd /STK=1 /UG=Ghi.8862 /UG_TITLE=Transcribed locus /REP_ORG=G. hirsutum
GhiAffx.63445.1.S1_at	DW520148.1	Ghi.19713	7.7968	0	gb:DW520148.1 dbest_id:35125931 /TID=GhiAffx.63445.1 /CNT=2 /FEA=EST /TIER=ConsEnd /STK=0 /NOTE=sequence(s) not in UniGene /REP_ORG=
Gra.2043.1.S1_at	CO125514	Gra.2043	7.72176	0	gb:CO125514 /DB_XREF=gi:48827124 /DB_XREF=GR__Eb09A20.r /CLONE=GR__Eb09A20 /TID=Gra.2043.1 /CNT=2 /FEA=EST /TIER=ConsEnd /STK=1 /UG=Gra.2043 /UG_TITLE=Transcribed locus, weakly similar to NP_671763.1 zinc finger (C3HC4-type RING finger) family protein (Arabidopsis thaliana) /REP_ORG=G. raimondii
GhiAffx.41917.1.S1_at	DW232754.1	Ghi.14112	7.6817	0	gb:DW232754.1 dbest_id:34836920 /TID=GhiAffx.41917.1 /CNT=3 /FEA=EST /TIER=ConsEnd /STK=0 /NOTE=sequence(s) not in UniGene /REP_ORG=
GhiAffx.13234.2.A1_at	DT459365	Ghi.13700	7.66351	0	gb:DT459365 /DB_XREF=gi:73850345 /DB_XREF=GH_ON37J02.r /CLONE=GH_ON37J02 /TID=GhiAffx.13234.2 /CNT=3 /FEA=EST /TIER=ConsEnd /STK=0 /NOTE=sequence(s) not in UniGene /REP_ORG=G. hirsutum
GarAffx.6150.1.S1_at	U27535.1	---	7.64744	0	gb:U27535.1 /DB_XREF=gi:1002522 /TID=GarAffx.6150.1 /CNT=2 /FEA=FLmRNA /TIER=FL /STK=1 /NOTE=sequence(s) not in UniGene /DEF=Gossypium arboreum (+)-delta-cadinene synthase isozyme A mRNA, complete cds. /PROD=(+)-delta-cadinene synthase isozyme A /FL=gb:U27535.1 /REP_ORG=G. arboreum
Ghi.3442.2.A1_x_at	DR460019	Ghi.16317	7.64141	0	gb:DR460019 /DB_XREF=gi:84171371 /DB_XREF=CM082D07 /TID=Ghi.3442.2 /CNT=6 /FEA=EST /TIER=ConsEnd /STK=0 /UG=Ghi.3442 /UG_TITLE=Transcribed locus, moderately similar to NP_563728.1 unknown protein (Arabidopsis thaliana) /REP_ORG=G. hirsutum
Ghi.6477.1.S1_at	DT050240	Ghi.6477	7.62252	0	gb:DT050240 /DB_XREF=gi:72275652 /DB_XREF=COT_DX_A08 /TID=Ghi.6477.1 /CNT=2 /FEA=EST /TIER=ConsEnd /STK=1 /UG=Ghi.6477 /UG_TITLE=Transcribed locus /REP_ORG=G. hirsutum
GhiAffx.29393.1.S1_s_at	DN760625	---	7.57147	0.0480414	gb:DN760625 /DB_XREF=gi:84146383 /DB_XREF=G.hir-stem 3132 /TID=GhiAffx.29393.1 /CNT=2 /FEA=EST /TIER=ConsEnd /STK=0 /NOTE=sequence(s) not in UniGene /REP_ORG=G. hirsutum
GhiAffx.35687.1.A1_s_at	DW477993.1	Ghi.21174	7.52415	0	gb:DW477993.1 dbest_id:35082421 /TID=GhiAffx.35687.1 /CNT=2 /FEA=EST /TIER=ConsEnd /STK=0 /NOTE=sequence(s) not in UniGene /REP_ORG=
Ghi.8314.1.S1_at	DT455655	Ghi.2045	7.50283	0	gb:DT455655 /DB_XREF=gi:73846635 /DB_XREF=GH_ON01H05.f /CLONE=GH_ON01H05 /TID=Ghi.8314.1 /CNT=4 /FEA=EST /TIER=ConsEnd /STK=0 /UG=Ghi.8314 /UG_TITLE=Transcribed locus, moderately similar to XP_471941.1 OSJNBa0008A08.9 (Oryza sativa (japonica cultivar-group)) /REP_ORG=G. hirsutum
Ghi.5971.1.S1_at	CO497706	Ghi.5971	7.45577	0	gb:CO497706 /DB_XREF=gi:54122197 /DB_XREF=G.h.fbr-sw07096 /TID=Ghi.5971.1 /CNT=1 /FEA=EST /TIER=ConsEnd /STK=0 /UG=Ghi.5971 /UG_TITLE=Transcribed locus /REP_ORG=G. hirsutum
Ghi.8820.1.S1_at	DT456298	Ghi.8820	7.45138	0	gb:DT456298 /DB_XREF=gi:73847278 /DB_XREF=GH_ON14B02.f /CLONE=GH_ON14B02 /TID=Ghi.8820.1 /CNT=2 /FEA=EST /TIER=ConsEnd /STK=0 /UG=Ghi.8820 /UG_TITLE=Transcribed locus /REP_ORG=G. hirsutum
GhiAffx.7229.1.S1_at	DW511231.1	Ghi.4122	7.42356	0	gb:DW511231.1 dbest_id:35117014 /TID=GhiAffx.7229.1 /CNT=3 /FEA=EST /TIER=ConsEnd /STK=0 /NOTE=sequence(s) not in UniGene /REP_ORG=
Ghi.8771.1.A1_at	DT054130	Ghi.8771	7.42315	0	gb:DT054130 /DB_XREF=gi:72283724 /DB_XREF=COT_FZ_B12 /TID=Ghi.8771.1 /CNT=11 /FEA=EST /TIER=Stack /STK=10 /UG=Ghi.8771 /UG_TITLE=Transcribed locus /REP_ORG=G. hirsutum
GhiAffx.26539.1.A1_x_at	DW504732.1	Ghi.22252	7.39313	0	gb:DW504732.1 dbest_id:35110515 /TID=GhiAffx.26539.1 /CNT=3 /FEA=EST /TIER=ConsEnd /STK=1 /NOTE=sequence(s) not in UniGene /REP_ORG=
Ghi.5817.1.S1_at	DV850218	Ghi.5817	7.34215	0	gb:DV850218 /DB_XREF=gi:82756656 /DB_XREF=GH_LSL29D02.f /CLONE=GH_LSL29D02 /TID=Ghi.5817.1 /CNT=2 /FEA=EST /TIER=ConsEnd /STK=0 /UG=Ghi.5817 /UG_TITLE=Transcribed locus, weakly similar to NP_176759.1 amine oxidase oxidoreductase (Arabidopsis thaliana) /REP_ORG=G. hirsutum
GraAffx.1384.1.S1_at	CO125935	---	7.34203	0	gb:CO125935 /DB_XREF=gi:48827545 /DB_XREF=GR__Eb09L01.r /CLONE=GR__Eb09L01 /TID=GraAffx.1384.1 /CNT=2 /FEA=EST /TIER=ConsEnd /STK=1 /NOTE=sequence(s) not in UniGene /REP_ORG=G. raimondii
GhiAffx.13869.1.S1_s_at	DW238077.1	Ghi.6518	7.31765	0	gb:DW238077.1 dbest_id:34842243 /TID=GhiAffx.13869.1 /CNT=2 /FEA=EST /TIER=ConsEnd /STK=1 /NOTE=sequence(s) not in UniGene /REP_ORG=
GhiAffx.15969.1.S1_at	DW226271.1	---	7.31285	0	gb:DW226271.1 dbest_id:34830443 /TID=GhiAffx.15969.1 /CNT=2 /FEA=EST /TIER=ConsEnd /STK=0 /NOTE=sequence(s) not in UniGene /REP_ORG=
Ghi.8929.1.A1_at	CO492012	Ghi.8929	7.30602	0	gb:CO492012 /DB_XREF=gi:54116503 /DB_XREF=G.h.fbr-sw01402 /TID=Ghi.8929.1 /CNT=3 /FEA=EST /TIER=ConsEnd /STK=1 /UG=Ghi.8929 /UG_TITLE=Transcribed locus /REP_ORG=G. hirsutum
Ghi.983.1.S1_at	DR452484	Ghi.983	7.30169	0	gb:DR452484 /DB_XREF=gi:84163836 /DB_XREF=CM003B05 /TID=Ghi.983.1 /CNT=1 /FEA=EST /TIER=ConsEnd /STK=0 /UG=Ghi.983 /UG_TITLE=Transcribed locus /REP_ORG=G. hirsutum
Ghi.4151.1.S1_at	DN759707	Ghi.4151	7.28902	0	gb:DN759707 /DB_XREF=gi:84145465 /DB_XREF=G.hir-stem 2211 /TID=Ghi.4151.1 /CNT=3 /FEA=EST /TIER=ConsEnd /STK=0 /UG=Ghi.4151 /UG_TITLE=Transcribed locus, weakly similar to NP_497893.1 R07E5.1 (Caenorhabditis elegans) /REP_ORG=G. hirsutum
Ghi.1338.1.S1_at	DN801403	Ghi.1338	7.26694	0	gb:DN801403 /DB_XREF=gi:84152048 /DB_XREF=G.hir-15-20 DAA bolls drought stressed 558 /TID=Ghi.1338.1 /CNT=3 /FEA=EST /TIER=ConsEnd /STK=1 /UG=Ghi.1338 /UG_TITLE=Transcribed locus /REP_ORG=G. hirsutum
GraAffx.33295.1.S1_s_at	CO130422	---	7.25226	0	gb:CO130422 /DB_XREF=gi:48879400 /DB_XREF=GR__Eb33C17.r /CLONE=GR__Eb33C17 /TID=GraAffx.33295.1 /CNT=12 /FEA=EST /TIER=ConsEnd /STK=1 /NOTE=sequence(s) not in UniGene /REP_ORG=G. raimondii
GhiAffx.60416.1.S1_at	DW504269.1	Ghi.6309	7.21146	0	gb:DW504269.1 dbest_id:35108697 /TID=GhiAffx.60416.1 /CNT=2 /FEA=EST /TIER=ConsEnd /STK=0 /NOTE=sequence(s) not in UniGene /REP_ORG=
Gra.3009.3.A1_s_at	CO121792	Gra.3009	7.1721	0	gb:CO121792 /DB_XREF=gi:48820479 /DB_XREF=GR__Eb03C05.r /CLONE=GR__Eb03C05 /TID=Gra.3009.3 /CNT=4 /FEA=EST /TIER=ConsEnd /STK=3 /UG=Gra.3009 /UG_TITLE=Transcribed locus, weakly similar to NP_564305.1 dormancy-associated protein, putative (DRM1) (Arabidopsis thaliana) /REP_ORG=G. raimondii
Ghi.9249.4.A1_at	DT461850	Ghi.9249	7.15429	0	gb:DT461850 /DB_XREF=gi:73859111 /DB_XREF=GH_CHX05D04.x /CLONE=GH_CHX05D04 /TID=Ghi.9249.4 /CNT=4 /FEA=EST /TIER=ConsEnd /STK=0 /UG=Ghi.9249 /UG_TITLE=Transcribed locus, moderately similar to NP_179101.1 GH3.1 (Arabidopsis thaliana) /REP_ORG=G. hirsutum
GhiAffx.23426.1.S1_at	DW236043.1	Ghi.16201	7.13334	0	gb:DW236043.1 dbest_id:34840209 /TID=GhiAffx.23426.1 /CNT=5 /FEA=EST /TIER=ConsEnd /STK=1 /NOTE=sequence(s) not in UniGene /REP_ORG=
GhiAffx.27955.1.S1_s_at	DW517210.1	Ghi.21086	7.10637	0	gb:DW517210.1 dbest_id:35122993 /TID=GhiAffx.27955.1 /CNT=7 /FEA=EST /TIER=ConsEnd /STK=1 /NOTE=sequence(s) not in UniGene /REP_ORG=
Ghi.8844.2.A1_at	DT456831	Ghi.8844	7.1031	0	gb:DT456831 /DB_XREF=gi:73847811 /DB_XREF=GH_ON33I12.r /CLONE=GH_ON33I12 /TID=Ghi.8844.2 /CNT=7 /FEA=EST /TIER=ConsEnd /STK=0 /UG=Ghi.8844 /UG_TITLE=Transcribed locus, weakly similar to NP_921028.1 putative reverse transcriptase (Oryza sativa (japonica cultivar-group)) /REP_ORG=G. hirsutum
Ghi.3938.2.S1_s_at	DT571293	Ghi.3938	7.10221	0	gb:DT571293 /DB_XREF=gi:78351019 /DB_XREF=EST1081933 /TID=Ghi.3938.2 /CNT=5 /FEA=EST /TIER=ConsEnd /STK=0 /UG=Ghi.3938 /UG_TITLE=Transcribed locus /REP_ORG=G. hirsutum
Ghi.8977.1.S1_at	DT459415	Ghi.8977	7.08572	0	gb:DT459415 /DB_XREF=gi:73850395 /DB_XREF=GH_ON37K11.r /CLONE=GH_ON37K11 /TID=Ghi.8977.1 /CNT=3 /FEA=EST /TIER=ConsEnd /STK=1 /UG=Ghi.8977 /UG_TITLE=Transcribed locus /REP_ORG=G. hirsutum
GhiAffx.879.1.S1_at	DN816995	Ghi.20471	7.08275	0	gb:DN816995 /DB_XREF=gi:84155769 /DB_XREF=G.hir-seedling 195 /TID=GhiAffx.879.1 /CNT=1 /FEA=EST /TIER=ConsEnd /STK=0 /NOTE=sequence(s) not in UniGene /REP_ORG=G. hirsutum
Ghi.680.1.S1_s_at	AF044205.1	Ghi.680	7.07997	0	gb:AF044205.1 /DB_XREF=gi:2829205 /GEN=PRP /TID=Ghi.680.1 /CNT=31 /FEA=FLmRNA /TIER=FL /STK=1 /UG=Ghi.680 /DEF=Gossypium hirsutum cultivar Siokra 1-2 proline-rich protein precursor (PRP) mRNA, complete cds. /PROD=proline-rich protein precursor /FL=gb:AF044205.1 /REP_ORG=G. hirsutum
GhiAffx.1938.1.S1_s_at	DT465616	---	7.0712	0	gb:DT465616 /DB_XREF=gi:73862877 /DB_XREF=GH_CHX17K15.r /CLONE=GH_CHX17K15 /TID=GhiAffx.1938.1 /CNT=2 /FEA=EST /TIER=ConsEnd /STK=1 /NOTE=sequence(s) not in UniGene /REP_ORG=G. hirsutum
Ghi.3468.1.A1_at	DT465471	Ghi.3468	7.06294	0	gb:DT465471 /DB_XREF=gi:73862732 /DB_XREF=GH_CHX17G17.r /CLONE=GH_CHX17G17 /TID=Ghi.3468.1 /CNT=1 /FEA=EST /TIER=ConsEnd /STK=1 /UG=Ghi.3468 /UG_TITLE=Transcribed locus, weakly similar to NP_568896.1 peptidase subtilase (Arabidopsis thaliana) /REP_ORG=G. hirsutum
Ghi.5035.1.A1_at	DT049333	Ghi.5035	7.04606	0	gb:DT049333 /DB_XREF=gi:72273793 /DB_XREF=COT_DL_E10 /TID=Ghi.5035.1 /CNT=2 /FEA=EST /TIER=ConsEnd /STK=1 /UG=Ghi.5035 /UG_TITLE=Transcribed locus, weakly similar to NP_850218.1 ubiquitin conjugating enzyme (Arabidopsis thaliana) /REP_ORG=G. hirsutum
Ghi.5197.1.A1_at	DT048671	Ghi.5197	7.04445	0	gb:DT048671 /DB_XREF=gi:72272478 /DB_XREF=COT_DD_C12 /TID=Ghi.5197.1 /CNT=2 /FEA=EST /TIER=ConsEnd /STK=1 /UG=Ghi.5197 /UG_TITLE=Transcribed locus /REP_ORG=G. hirsutum
Ghi.752.2.S1_s_at	DT544457	Ghi.752	7.02691	0	gb:DT544457 /DB_XREF=gi:78324183 /DB_XREF=EST1055097 /TID=Ghi.752.2 /CNT=18 /FEA=EST /TIER=ConsEnd /STK=0 /UG=Ghi.752 /UG_TITLE=Transcribed locus, moderately similar to NP_850933.1 SR1; RNA binding nucleic acid binding (Arabidopsis thaliana) /REP_ORG=G. hirsutum
GhiAffx.7683.2.A1_at	DW514519.1	Ghi.18547	7.01162	0	gb:DW514519.1 dbest_id:35120302 /TID=GhiAffx.7683.2 /CNT=2 /FEA=EST /TIER=ConsEnd /STK=1 /NOTE=sequence(s) not in UniGene /REP_ORG=
Ghi.3751.1.A1_s_at	DT462024	---	6.99237	0	gb:DT462024 /DB_XREF=gi:73859285 /DB_XREF=GH_CHX07F09.x /CLONE=GH_CHX07F09 /TID=Ghi.3751.1 /CNT=1 /FEA=EST /TIER=ConsEnd /STK=0 /UG=Ghi.3751 /UG_TITLE=Transcribed locus /REP_ORG=G. hirsutum
Ghi.4537.1.A1_at	DT050601	Ghi.4537	6.98711	0	gb:DT050601 /DB_XREF=gi:72276370 /DB_XREF=COT_EB_E10 /TID=Ghi.4537.1 /CNT=2 /FEA=EST /TIER=ConsEnd /STK=1 /UG=Ghi.4537 /UG_TITLE=Transcribed locus /REP_ORG=G. hirsutum
GhiAffx.24586.1.S1_at	DW511858.1	Ghi.16513	6.97963	0	gb:DW511858.1 dbest_id:35117641 /TID=GhiAffx.24586.1 /CNT=3 /FEA=EST /TIER=ConsEnd /STK=0 /NOTE=sequence(s) not in UniGene /REP_ORG=
Ghi.3894.1.A1_at	DT458603	Ghi.7944	6.97432	0	gb:DT458603 /DB_XREF=gi:73849583 /DB_XREF=GH_ON36G11.r /CLONE=GH_ON36G11 /TID=Ghi.3894.1 /CNT=3 /FEA=EST /TIER=ConsEnd /STK=1 /UG=Ghi.3894 /UG_TITLE=Transcribed locus, moderately similar to NP_192009.1 unknown protein (Arabidopsis thaliana) /REP_ORG=G. hirsutum
GhiAffx.22905.1.A1_s_at	DW243200.1	Ghi.10742	6.95211	0	gb:DW243200.1 dbest_id:34847366 /TID=GhiAffx.22905.1 /CNT=2 /FEA=EST /TIER=ConsEnd /STK=1 /NOTE=sequence(s) not in UniGene /REP_ORG=
Ghi.1690.1.S1_x_at	DN759952	Ghi.1690	6.94652	0	gb:DN759952 /DB_XREF=gi:84145710 /DB_XREF=G.hir-stem 2459 /TID=Ghi.1690.1 /CNT=1 /FEA=EST /TIER=ConsEnd /STK=0 /UG=Ghi.1690 /UG_TITLE=Transcribed locus /REP_ORG=G. hirsutum
GhiAffx.47722.1.S1_at	DT459113	---	6.90721	0	gb:DT459113 /DB_XREF=gi:73850093 /DB_XREF=GH_ON37C20.r /CLONE=GH_ON37C20 /TID=GhiAffx.47722.1 /CNT=2 /FEA=EST /TIER=ConsEnd /STK=0 /NOTE=sequence(s) not in UniGene /REP_ORG=G. hirsutum
Ghi.110.1.S1_at	DR462789	Ghi.1173	6.90035	0	gb:DR462789 /DB_XREF=gi:84174141 /DB_XREF=CM111F03 /TID=Ghi.110.1 /CNT=1 /FEA=EST /TIER=ConsEnd /STK=0 /UG=Ghi.110 /UG_TITLE=Transcribed locus /REP_ORG=G. hirsutum
Ghi.8787.1.S1_s_at	DT455800	Ghi.8787	6.89876	0	gb:DT455800 /DB_XREF=gi:73846780 /DB_XREF=GH_ON03G05.f /CLONE=GH_ON03G05 /TID=Ghi.8787.1 /CNT=4 /FEA=EST /TIER=ConsEnd /STK=0 /UG=Ghi.8787 /UG_TITLE=Transcribed locus, moderately similar to NP_187594.1 ATP binding kinase protein kinase protein serinethreonine kinase protein-tyrosine kinase (Arabidopsis thaliana) /REP_ORG=G. hirsutum
Ghi.5866.1.A1_x_at	DT466168	Ghi.5866	6.89781	0	gb:DT466168 /DB_XREF=gi:73863429 /DB_XREF=GH_CHX18H22.r /CLONE=GH_CHX18H22 /TID=Ghi.5866.1 /CNT=6 /FEA=EST /TIER=ConsEnd /STK=1 /UG=Ghi.5866 /UG_TITLE=Transcribed locus, moderately similar to NP_180988.3 O-acetyltransferase (Arabidopsis thaliana) /REP_ORG=G. hirsutum
Ghi.3297.1.A1_at	DT468804	Ghi.3297	6.88133	0	gb:DT468804 /DB_XREF=gi:73866066 /DB_XREF=GH_CHX22H15.r /CLONE=GH_CHX22H15 /TID=Ghi.3297.1 /CNT=2 /FEA=EST /TIER=ConsEnd /STK=1 /UG=Ghi.3297 /UG_TITLE=Transcribed locus, moderately similar to NP_849567.2 KAK (KAKTUS) (Arabidopsis thaliana) /REP_ORG=G. hirsutum
Ghi.9297.1.A1_at	DT461121	Ghi.9297	6.879	0	gb:DT461121 /DB_XREF=gi:73852101 /DB_XREF=GH_ON40G06.r /CLONE=GH_ON40G06 /TID=Ghi.9297.1 /CNT=3 /FEA=EST /TIER=ConsEnd /STK=1 /UG=Ghi.9297 /UG_TITLE=Transcribed locus /REP_ORG=G. hirsutum
Ghi.4242.1.S1_at	DT456065	Ghi.4242	6.87579	0	gb:DT456065 /DB_XREF=gi:73847045 /DB_XREF=GH_ON11C08.f /CLONE=GH_ON11C08 /TID=Ghi.4242.1 /CNT=4 /FEA=EST /TIER=ConsEnd /STK=0 /UG=Ghi.4242 /UG_TITLE=Transcribed locus /REP_ORG=G. hirsutum
GhiAffx.25605.1.S1_at	DW517222.1	---	6.86776	0	gb:DW517222.1 dbest_id:35123005 /TID=GhiAffx.25605.1 /CNT=2 /FEA=EST /TIER=ConsEnd /STK=1 /NOTE=sequence(s) not in UniGene /REP_ORG=
GraAffx.14886.1.A1_s_at	CO126409	---	6.85	0	gb:CO126409 /DB_XREF=gi:48828019 /DB_XREF=GR__Eb10G18.r /CLONE=GR__Eb10G18 /TID=GraAffx.14886.1 /CNT=1 /FEA=EST /TIER=ConsEnd /STK=1 /NOTE=sequence(s) not in UniGene /REP_ORG=G. raimondii
GhiAffx.1589.94.S1_at	DW239613.1	Ghi.10906	6.84755	0	gb:DW239613.1 dbest_id:34843779 /TID=GhiAffx.1589.94 /CNT=5 /FEA=EST /TIER=ConsEnd /STK=0 /NOTE=sequence(s) not in UniGene /REP_ORG=
GhiAffx.22869.1.S1_at	DW503013.1	---	6.83856	0	gb:DW503013.1 dbest_id:35107441 /TID=GhiAffx.22869.1 /CNT=2 /FEA=EST /TIER=ConsEnd /STK=1 /NOTE=sequence(s) not in UniGene /REP_ORG=
GhiAffx.7786.1.A1_s_at	DW515721.1	Ghi.11257	6.83061	0	gb:DW515721.1 dbest_id:35121504 /TID=GhiAffx.7786.1 /CNT=4 /FEA=EST /TIER=ConsEnd /STK=1 /NOTE=sequence(s) not in UniGene /REP_ORG=
Ghi.1683.1.S1_x_at	DN758638	Ghi.1683	6.82932	0	gb:DN758638 /DB_XREF=gi:84144396 /DB_XREF=G.hir-stem 1142 /TID=Ghi.1683.1 /CNT=2 /FEA=EST /TIER=ConsEnd /STK=0 /UG=Ghi.1683 /UG_TITLE=Transcribed locus, weakly similar to NP_175113.2 protein binding (Arabidopsis thaliana) /REP_ORG=G. hirsutum
Ghi.3317.2.A1_at	DT467341	Ghi.3317	6.81279	0	gb:DT467341 /DB_XREF=gi:73864602 /DB_XREF=GH_CHX20E04.r /CLONE=GH_CHX20E04 /TID=Ghi.3317.2 /CNT=3 /FEA=EST /TIER=ConsEnd /STK=0 /UG=Ghi.3317 /UG_TITLE=Transcribed locus, moderately similar to NP_197227.1 transferase (Arabidopsis thaliana) /REP_ORG=G. hirsutum
GraAffx.33887.1.A1_a_at	CO116307	---	6.78261	0	gb:CO116307 /DB_XREF=gi:48814994 /DB_XREF=GR__Eb018I04.r /CLONE=GR__Eb018I04 /TID=GraAffx.33887.1 /CNT=2 /FEA=EST /TIER=ConsEnd /STK=1 /NOTE=sequence(s) not in UniGene /REP_ORG=G. raimondii
Ghi.275.1.A1_at	DR461257	Ghi.14025	6.7612	0	gb:DR461257 /DB_XREF=gi:84172609 /DB_XREF=CM095E02 /TID=Ghi.275.1 /CNT=1 /FEA=EST /TIER=ConsEnd /STK=0 /UG=Ghi.275 /UG_TITLE=Transcribed locus /REP_ORG=G. hirsutum
Ghi.3449.1.A1_at	DT465719	Ghi.3449	6.7584	0	gb:DT465719 /DB_XREF=gi:73862980 /DB_XREF=GH_CHX17N06.r /CLONE=GH_CHX17N06 /TID=Ghi.3449.1 /CNT=1 /FEA=EST /TIER=ConsEnd /STK=1 /UG=Ghi.3449 /UG_TITLE=Transcribed locus /REP_ORG=G. hirsutum
Ghi.3814.1.A1_at	DT461514	Ghi.3814	6.75416	0	gb:DT461514 /DB_XREF=gi:73858775 /DB_XREF=GH_CHX01C09.x /CLONE=GH_CHX01C09 /TID=Ghi.3814.1 /CNT=1 /FEA=EST /TIER=ConsEnd /STK=0 /UG=Ghi.3814 /UG_TITLE=Transcribed locus /REP_ORG=G. hirsutum
Ghi.5601.1.A1_at	DT047203	Ghi.5601	6.74254	0	gb:DT047203 /DB_XREF=gi:72269533 /DB_XREF=COT_CL_C07 /TID=Ghi.5601.1 /CNT=2 /FEA=EST /TIER=ConsEnd /STK=2 /UG=Ghi.5601 /UG_TITLE=Transcribed locus /REP_ORG=G. hirsutum
GhiAffx.49937.1.A1_at	DT464373	---	6.74146	0	gb:DT464373 /DB_XREF=gi:73861634 /DB_XREF=GH_CHX15I15.r /CLONE=GH_CHX15I15 /TID=GhiAffx.49937.1 /CNT=5 /FEA=EST /TIER=ConsEnd /STK=0 /NOTE=sequence(s) not in UniGene /REP_ORG=G. hirsutum
Ghi.3391.2.S1_at	DT456403	Ghi.3391	6.71005	0	gb:DT456403 /DB_XREF=gi:73847383 /DB_XREF=GH_ON15D05.f /CLONE=GH_ON15D05 /TID=Ghi.3391.2 /CNT=2 /FEA=EST /TIER=ConsEnd /STK=0 /UG=Ghi.3391 /UG_TITLE=Transcribed locus, weakly similar to NP_192939.2 WRKY19; transcription factor (Arabidopsis thaliana) /REP_ORG=G. hirsutum
GhiAffx.21819.1.S1_at	DT047024	Ghi.14634	6.70842	0	gb:DT047024 /DB_XREF=gi:72269173 /DB_XREF=COT_CJ_A10 /TID=GhiAffx.21819.1 /CNT=3 /FEA=EST /TIER=ConsEnd /STK=1 /NOTE=sequence(s) not in UniGene /REP_ORG=G. hirsutum
Ghi.3312.4.A1_at	DT467399	Ghi.3312	6.70494	0	gb:DT467399 /DB_XREF=gi:73864660 /DB_XREF=GH_CHX20F17.r /CLONE=GH_CHX20F17 /TID=Ghi.3312.4 /CNT=3 /FEA=EST /TIER=ConsEnd /STK=1 /UG=Ghi.3312 /UG_TITLE=Transcribed locus, moderately similar to NP_568220.1 RNA binding nucleic acid binding (Arabidopsis thaliana) /REP_ORG=G. hirsutum
Ghi.8874.1.S1_at	DT456410	Ghi.8874	6.70351	0	gb:DT456410 /DB_XREF=gi:73847390 /DB_XREF=GH_ON15D12.f /CLONE=GH_ON15D12 /TID=Ghi.8874.1 /CNT=3 /FEA=EST /TIER=ConsEnd /STK=0 /UG=Ghi.8874 /UG_TITLE=Transcribed locus, moderately similar to NP_196886.1 TBP1 (TELOMERIC DNA BINDING PROTEIN 1); DNA binding (Arabidopsis thaliana) /REP_ORG=G. hirsutum
Ghi.7389.2.A1_x_at	DT467704	Ghi.7389	6.67754	0	gb:DT467704 /DB_XREF=gi:73864965 /DB_XREF=GH_CHX20N03.r /CLONE=GH_CHX20N03 /TID=Ghi.7389.2 /CNT=1 /FEA=EST /TIER=ConsEnd /STK=1 /UG=Ghi.7389 /UG_TITLE=Transcribed locus, weakly similar to NP_182150.1 GBF3 (G-BOX BINDING FACTOR 3); transcription factor (Arabidopsis thaliana) /REP_ORG=G. hirsutum
Ghi.7232.1.S1_s_at	AW186965	Ghi.7232	6.66785	0	gb:AW186965 /DB_XREF=gi:6461401 /DB_XREF=BNLGHi7923 /TID=Ghi.7232.1 /CNT=1 /FEA=EST /TIER=ConsEnd /STK=0 /UG=Ghi.7232 /UG_TITLE=Transcribed locus /REP_ORG=G. hirsutum
Ghi.8846.1.S1_x_at	DT456233	Ghi.17715	6.65694	0	gb:DT456233 /DB_XREF=gi:73847213 /DB_XREF=GH_ON13C07.f /CLONE=GH_ON13C07 /TID=Ghi.8846.1 /CNT=3 /FEA=EST /TIER=ConsEnd /STK=0 /UG=Ghi.8846 /UG_TITLE=Transcribed locus, moderately similar to NP_197208.1 GTP binding (Arabidopsis thaliana) /REP_ORG=G. hirsutum
GhiAffx.31656.1.S1_at	DT458913	Ghi.48	6.65477	0	gb:DT458913 /DB_XREF=gi:73849893 /DB_XREF=GH_ON36N18.r /CLONE=GH_ON36N18 /TID=GhiAffx.31656.1 /CNT=2 /FEA=EST /TIER=ConsEnd /STK=1 /NOTE=sequence(s) not in UniGene /REP_ORG=G. hirsutum
GraAffx.33470.1.S1_s_at	CO091188	---	6.63494	0	gb:CO091188 /DB_XREF=gi:48789874 /DB_XREF=GR__Ea11I20.r /CLONE=GR__Ea11I20 /TID=GraAffx.33470.1 /CNT=5 /FEA=EST /TIER=ConsEnd /STK=1 /NOTE=sequence(s) not in UniGene /REP_ORG=G. raimondii
Ghi.1739.2.S1_s_at	DN759923	Ghi.17807	6.6291	0.0366566	gb:DN759923 /DB_XREF=gi:84145681 /DB_XREF=G.hir-stem 2430 /TID=Ghi.1739.2 /CNT=5 /FEA=EST /TIER=ConsEnd /STK=0 /UG=Ghi.1739 /UG_TITLE=Transcribed locus, moderately similar to NP_177396.1 iron ion binding lipoxygenase (Arabidopsis thaliana) /REP_ORG=G. hirsutum
Ghi.4748.1.A1_at	DN818131	Ghi.4748	6.62084	0	gb:DN818131 /DB_XREF=gi:84156905 /DB_XREF=G.hir-seedling 1331 /TID=Ghi.4748.1 /CNT=4 /FEA=EST /TIER=ConsEnd /STK=0 /UG=Ghi.4748 /UG_TITLE=Transcribed locus, moderately similar to NP_194529.1 ATP binding ATPase nucleoside-triphosphatase nucleotide binding (Arabidopsis thaliana) /REP_ORG=G. hirsutum
Ghi.6433.1.S1_at	CF932068	Ghi.17307	6.6076	0.0627412	gb:CF932068 /DB_XREF=gi:45438649 /DB_XREF=SP11-H8(P23-G2) /CLONE=SP11-H8(P23-G2) /TID=Ghi.6433.1 /CNT=124 /FEA=EST /TIER=ConsEnd /STK=0 /UG=Ghi.6433 /UG_TITLE=Transcribed locus, moderately similar to NP_179068.1 PR1 (PATHOGENESIS-RELATED GENE 1) (Arabidopsis thaliana) /REP_ORG=G. hirsutum
Ghi.1597.1.S1_at	DN761764	Ghi.1597	6.58036	0	gb:DN761764 /DB_XREF=gi:84147522 /DB_XREF=G.hir-stem 4271 /TID=Ghi.1597.1 /CNT=2 /FEA=EST /TIER=ConsEnd /STK=0 /UG=Ghi.1597 /UG_TITLE=Transcribed locus /REP_ORG=G. hirsutum
Ghi.73.1.S1_at	DR463146	Ghi.73	6.57951	0	gb:DR463146 /DB_XREF=gi:84174498 /DB_XREF=CM115D02 /TID=Ghi.73.1 /CNT=1 /FEA=EST /TIER=ConsEnd /STK=0 /UG=Ghi.73 /UG_TITLE=Transcribed locus /REP_ORG=G. hirsutum
Ghi.7844.1.A1_at	AI725657	Ghi.7844	6.54688	0	gb:AI725657 /DB_XREF=gi:5044509 /DB_XREF=BNLGHi12564 /TID=Ghi.7844.1 /CNT=2 /FEA=EST /TIER=ConsEnd /STK=0 /UG=Ghi.7844 /UG_TITLE=Transcribed locus, weakly similar to XP_477574.1 RRM-containing RNA-binding protein-like (Oryza sativa (japonica cultivar-group)) /REP_ORG=G. hirsutum
GhiAffx.40824.1.A1_at	DW499731.1	---	6.54232	0	gb:DW499731.1 dbest_id:35104159 /TID=GhiAffx.40824.1 /CNT=2 /FEA=EST /TIER=ConsEnd /STK=0 /NOTE=sequence(s) not in UniGene /REP_ORG=
Ghi.1936.1.S1_s_at	DV848985	Ghi.2086	6.53395	0	gb:DV848985 /DB_XREF=gi:82755423 /DB_XREF=GH_LSL05E02.f /CLONE=GH_LSL05E02 /TID=Ghi.1936.1 /CNT=1 /FEA=EST /TIER=ConsEnd /STK=1 /UG=Ghi.1936 /UG_TITLE=Transcribed locus /REP_ORG=G. hirsutum
Ghi.8924.2.A1_s_at	DT047531	Ghi.8924	6.53084	0	gb:DT047531 /DB_XREF=gi:72270190 /DB_XREF=COT_CP_B07 /TID=Ghi.8924.2 /CNT=1 /FEA=EST /TIER=ConsEnd /STK=1 /UG=Ghi.8924 /UG_TITLE=Transcribed locus, moderately similar to NP_914660.1 putative response regulator (Oryza sativa (japonica cultivar-group)) /REP_ORG=G. hirsutum
Ghi.1739.3.S1_s_at	DT462617	Ghi.1739	6.52305	0.0366566	gb:DT462617 /DB_XREF=gi:73859878 /DB_XREF=GH_CHX12F17.r /CLONE=GH_CHX12F17 /TID=Ghi.1739.3 /CNT=3 /FEA=EST /TIER=ConsEnd /STK=1 /UG=Ghi.1739 /UG_TITLE=Transcribed locus, moderately similar to NP_177396.1 iron ion binding lipoxygenase (Arabidopsis thaliana) /REP_ORG=G. hirsutum
Ghi.4572.1.A1_at	DT052182	Ghi.5549	6.50462	0	gb:DT052182 /DB_XREF=gi:72279736 /DB_XREF=COT_EU_H07 /TID=Ghi.4572.1 /CNT=2 /FEA=EST /TIER=ConsEnd /STK=2 /UG=Ghi.4572 /UG_TITLE=Transcribed locus /REP_ORG=G. hirsutum
Ghi.802.1.S1_at	DR454679	Ghi.802	6.50103	0	gb:DR454679 /DB_XREF=gi:84166031 /DB_XREF=CM026C10 /TID=Ghi.802.1 /CNT=1 /FEA=EST /TIER=ConsEnd /STK=0 /UG=Ghi.802 /UG_TITLE=Transcribed locus /REP_ORG=G. hirsutum
Ghi.7844.1.S1_at	AI725657	Ghi.7844	6.46745	0	gb:AI725657 /DB_XREF=gi:5044509 /DB_XREF=BNLGHi12564 /TID=Ghi.7844.1 /CNT=2 /FEA=EST /TIER=ConsEnd /STK=0 /UG=Ghi.7844 /UG_TITLE=Transcribed locus, weakly similar to XP_477574.1 RRM-containing RNA-binding protein-like (Oryza sativa (japonica cultivar-group)) /REP_ORG=G. hirsutum
Gra.2073.1.A1_s_at	CO117571	Gra.2073	6.45883	0	gb:CO117571 /DB_XREF=gi:48816258 /DB_XREF=GR__Eb01H06.r /CLONE=GR__Eb01H06 /TID=Gra.2073.1 /CNT=3 /FEA=EST /TIER=ConsEnd /STK=1 /UG=Gra.2073 /UG_TITLE=Transcribed locus, weakly similar to NP_564820.1 D111G-patch domain-containing protein (Arabidopsis thaliana) /REP_ORG=G. raimondii
Ghi.4295.1.S1_x_at	DT455725	Ghi.4295	6.45611	0	gb:DT455725 /DB_XREF=gi:73846705 /DB_XREF=GH_ON02G05.f /CLONE=GH_ON02G05 /TID=Ghi.4295.1 /CNT=1 /FEA=EST /TIER=ConsEnd /STK=0 /UG=Ghi.4295 /UG_TITLE=Transcribed locus /REP_ORG=G. hirsutum
Ghi.8967.1.S1_at	DT458982	Ghi.8967	6.41834	0	gb:DT458982 /DB_XREF=gi:73849962 /DB_XREF=GH_ON36P09.r /CLONE=GH_ON36P09 /TID=Ghi.8967.1 /CNT=4 /FEA=EST /TIER=ConsEnd /STK=2 /UG=Ghi.8967 /UG_TITLE=Transcribed locus /REP_ORG=G. hirsutum
Ghi.3276.1.A1_at	DT467775	Ghi.3276	6.41678	0	gb:DT467775 /DB_XREF=gi:73865036 /DB_XREF=GH_CHX20O17.r /CLONE=GH_CHX20O17 /TID=Ghi.3276.1 /CNT=1 /FEA=EST /TIER=ConsEnd /STK=1 /UG=Ghi.3276 /UG_TITLE=Transcribed locus /REP_ORG=G. hirsutum
GhiAffx.25449.1.A1_at	DW516358.1	---	6.4049	0	gb:DW516358.1 dbest_id:35122141 /TID=GhiAffx.25449.1 /CNT=2 /FEA=EST /TIER=ConsEnd /STK=1 /NOTE=sequence(s) not in UniGene /REP_ORG=
GhiAffx.2814.1.S1_at	AJ513452	Ghi.19017	6.39728	0	gb:AJ513452 /DB_XREF=gi:24976935 /DB_XREF=AJ513452 /CLONE=suo22d03r3 /TID=GhiAffx.2814.1 /CNT=2 /FEA=EST /TIER=ConsEnd /STK=0 /NOTE=sequence(s) not in UniGene /REP_ORG=G. hirsutum
GhiAffx.13350.1.S1_at	DT458177	---	6.38532	0	gb:DT458177 /DB_XREF=gi:73849157 /DB_XREF=GH_ON35L17.r /CLONE=GH_ON35L17 /TID=GhiAffx.13350.1 /CNT=2 /FEA=EST /TIER=ConsEnd /STK=1 /NOTE=sequence(s) not in UniGene /REP_ORG=G. hirsutum
Ghi.6905.1.S1_x_at	CA992665	Ghi.6905	6.38308	0	gb:CA992665 /DB_XREF=gi:31072386 /DB_XREF=pAR0022 /TID=Ghi.6905.1 /CNT=1 /FEA=EST /TIER=ConsEnd /STK=0 /UG=Ghi.6905 /UG_TITLE=Transcribed locus /REP_ORG=G. hirsutum
Ghi.4841.1.A1_at	DT050241	Ghi.4841	6.36956	0	gb:DT050241 /DB_XREF=gi:72275654 /DB_XREF=COT_DX_A09 /TID=Ghi.4841.1 /CNT=1 /FEA=EST /TIER=ConsEnd /STK=1 /UG=Ghi.4841 /UG_TITLE=Transcribed locus /REP_ORG=G. hirsutum
Ghi.7674.1.S1_s_at	AI725578	Ghi.7674	6.35975	0	gb:AI725578 /DB_XREF=gi:5044430 /DB_XREF=BNLGHi12364 /TID=Ghi.7674.1 /CNT=3 /FEA=EST /TIER=ConsEnd /STK=0 /UG=Ghi.7674 /UG_TITLE=Transcribed locus, moderately similar to XP_467691.1 putative helicase (Oryza sativa (japonica cultivar-group)) /REP_ORG=G. hirsutum
GhiAffx.52015.1.S1_at	DW494068.1	Ghi.15430	6.34454	0	gb:DW494068.1 dbest_id:35098496 /TID=GhiAffx.52015.1 /CNT=2 /FEA=EST /TIER=ConsEnd /STK=0 /NOTE=sequence(s) not in UniGene /REP_ORG=
GhiAffx.24798.1.S1_at	DW512973.1	---	6.32351	0	gb:DW512973.1 dbest_id:35118756 /TID=GhiAffx.24798.1 /CNT=2 /FEA=EST /TIER=ConsEnd /STK=0 /NOTE=sequence(s) not in UniGene /REP_ORG=
Ghi.8834.1.S1_x_at	DT456089	Ghi.8834	6.31185	0	gb:DT456089 /DB_XREF=gi:73847069 /DB_XREF=GH_ON11F01.f /CLONE=GH_ON11F01 /TID=Ghi.8834.1 /CNT=2 /FEA=EST /TIER=ConsEnd /STK=0 /UG=Ghi.8834 /UG_TITLE=Transcribed locus, weakly similar to NP_201474.1 nucleic acid binding transcription factor zinc ion binding (Arabidopsis thaliana) /REP_ORG=G. hirsutum
Ghi.7538.1.A1_at	DT466636	---	6.30064	0	gb:DT466636 /DB_XREF=gi:73863897 /DB_XREF=GH_CHX19C17.r /CLONE=GH_CHX19C17 /TID=Ghi.7538.1 /CNT=1 /FEA=EST /TIER=ConsEnd /STK=1 /UG=Ghi.7538 /UG_TITLE=Transcribed locus, weakly similar to XP_477572.1 peptidase family-like protein (Oryza sativa (japonica cultivar-group)) /REP_ORG=G. hirsutum
Ghi.3597.1.S1_at	DT459826	Ghi.3597	6.297	0	gb:DT459826 /DB_XREF=gi:73850806 /DB_XREF=GH_ON38F04.f /CLONE=GH_ON38F04 /TID=Ghi.3597.1 /CNT=2 /FEA=EST /TIER=ConsEnd /STK=0 /UG=Ghi.3597 /UG_TITLE=Transcribed locus, weakly similar to NP_922349.1 putative reverse transcriptase (Oryza sativa (japonica cultivar-group)) /REP_ORG=G. hirsutum
Gra.873.1.A1_at	CO080692	Gra.873	6.29529	0	gb:CO080692 /DB_XREF=gi:48750173 /DB_XREF=GR__Ea44F02.r /CLONE=GR__Ea44F02 /TID=Gra.873.1 /CNT=2 /FEA=EST /TIER=ConsEnd /STK=1 /UG=Gra.873 /UG_TITLE=Transcribed locus, weakly similar to NP_193898.2 double-stranded RNA-binding domain (DsRBD)-containing protein (Arabidopsis thaliana) /REP_ORG=G. raimondii
GhiAffx.24068.2.S1_a_at	DW509331.1	---	6.28671	0	gb:DW509331.1 dbest_id:35115114 /TID=GhiAffx.24068.2 /CNT=2 /FEA=EST /TIER=ConsEnd /STK=1 /NOTE=sequence(s) not in UniGene /REP_ORG=
GhiAffx.7457.1.S1_at	DW511971.1	Ghi.11408	6.28465	0	gb:DW511971.1 dbest_id:35117754 /TID=GhiAffx.7457.1 /CNT=4 /FEA=EST /TIER=ConsEnd /STK=1 /NOTE=sequence(s) not in UniGene /REP_ORG=
Ghi.861.1.S1_at	DR453891	Ghi.861	6.26961	0	gb:DR453891 /DB_XREF=gi:84165243 /DB_XREF=CM018A08 /TID=Ghi.861.1 /CNT=1 /FEA=EST /TIER=ConsEnd /STK=0 /UG=Ghi.861 /UG_TITLE=Transcribed locus /REP_ORG=G. hirsutum
Ghi.4133.1.A1_at	DT457497	Ghi.4133	6.26686	0	gb:DT457497 /DB_XREF=gi:73848477 /DB_XREF=GH_ON34K11.f /CLONE=GH_ON34K11 /TID=Ghi.4133.1 /CNT=3 /FEA=EST /TIER=ConsEnd /STK=0 /UG=Ghi.4133 /UG_TITLE=Transcribed locus /REP_ORG=G. hirsutum
Ghi.403.1.S1_at	DR459872	Ghi.403	6.25822	0	gb:DR459872 /DB_XREF=gi:84171224 /DB_XREF=CM080H03 /TID=Ghi.403.1 /CNT=1 /FEA=EST /TIER=ConsEnd /STK=0 /UG=Ghi.403 /UG_TITLE=Transcribed locus /REP_ORG=G. hirsutum
GhiAffx.984.1.A1_s_at	DW230737.1	Ghi.20371	6.24414	0	gb:DW230737.1 dbest_id:34834909 /TID=GhiAffx.984.1 /CNT=2 /FEA=EST /TIER=ConsEnd /STK=1 /NOTE=sequence(s) not in UniGene /REP_ORG=
Ghi.8919.1.A1_x_at	DT553606	Ghi.8919	6.21865	0	gb:DT553606 /DB_XREF=gi:78333332 /DB_XREF=EST1064246 /TID=Ghi.8919.1 /CNT=6 /FEA=EST /TIER=ConsEnd /STK=0 /UG=Ghi.8919 /UG_TITLE=Transcribed locus /REP_ORG=G. hirsutum
Ghi.8865.1.S1_at	DT456438	Ghi.8865	6.21372	0	gb:DT456438 /DB_XREF=gi:73847418 /DB_XREF=GH_ON15G12.f /CLONE=GH_ON15G12 /TID=Ghi.8865.1 /CNT=3 /FEA=EST /TIER=ConsEnd /STK=1 /UG=Ghi.8865 /UG_TITLE=Transcribed locus, moderately similar to NP_200901.2 ATP binding microtubule motor (Arabidopsis thaliana) /REP_ORG=G. hirsutum
GhiAffx.30957.1.A1_at	DT464225	Ghi.19575	6.20217	0	gb:DT464225 /DB_XREF=gi:73861486 /DB_XREF=GH_CHX15E10.r /CLONE=GH_CHX15E10 /TID=GhiAffx.30957.1 /CNT=2 /FEA=EST /TIER=ConsEnd /STK=1 /NOTE=sequence(s) not in UniGene /REP_ORG=G. hirsutum
Gra.1939.3.S1_a_at	CO081012	Gra.1939	6.19072	0	gb:CO081012 /DB_XREF=gi:48750493 /DB_XREF=GR__Ea44M24.f /CLONE=GR__Ea44M24 /TID=Gra.1939.3 /CNT=5 /FEA=EST /TIER=ConsEnd /STK=0 /UG=Gra.1939 /UG_TITLE=Transcribed locus /REP_ORG=G. raimondii
Ghi.62.1.S1_at	DR463249	Ghi.62	6.16852	0	gb:DR463249 /DB_XREF=gi:84174601 /DB_XREF=CM116D09 /TID=Ghi.62.1 /CNT=1 /FEA=EST /TIER=ConsEnd /STK=0 /UG=Ghi.62 /UG_TITLE=Transcribed locus, weakly similar to XP_463151.1 putative NPH3 family protein (with alternative splicing) (Oryza sativa (japonica cultivar-group)) /REP_ORG=G. hirsutum
GhiAffx.4036.1.S1_a_at	DW511980.1	Ghi.19737	6.15112	0	gb:DW511980.1 dbest_id:35117763 /TID=GhiAffx.4036.1 /CNT=3 /FEA=EST /TIER=ConsEnd /STK=0 /NOTE=sequence(s) not in UniGene /REP_ORG=
Ghi.2962.2.S1_at	DT466098	Ghi.2962	6.14774	0	gb:DT466098 /DB_XREF=gi:73863359 /DB_XREF=GH_CHX18G07.f /CLONE=GH_CHX18G07 /TID=Ghi.2962.2 /CNT=2 /FEA=EST /TIER=ConsEnd /STK=0 /UG=Ghi.2962 /UG_TITLE=Transcribed locus, moderately similar to NP_171753.1 ATPase, coupled to transmembrane movement of substances (Arabidopsis thaliana) /REP_ORG=G. hirsutum
GhiAffx.46794.1.S1_at	DW511353.1	Ghi.15328	6.14597	0	gb:DW511353.1 dbest_id:35117136 /TID=GhiAffx.46794.1 /CNT=10 /FEA=EST /TIER=ConsEnd /STK=0 /NOTE=sequence(s) not in UniGene /REP_ORG=
GhiAffx.1589.39.S1_at	DW489624.1	Ghi.10942	6.10365	0	gb:DW489624.1 dbest_id:35094052 /TID=GhiAffx.1589.39 /CNT=5 /FEA=EST /TIER=ConsEnd /STK=0 /NOTE=sequence(s) not in UniGene /REP_ORG=
Ghi.3588.2.S1_at	DT460560	Ghi.3588	6.09916	0	gb:DT460560 /DB_XREF=gi:73851540 /DB_XREF=GH_ON39H22.r /CLONE=GH_ON39H22 /TID=Ghi.3588.2 /CNT=2 /FEA=EST /TIER=ConsEnd /STK=0 /UG=Ghi.3588 /UG_TITLE=Transcribed locus /REP_ORG=G. hirsutum
Ghi.9090.1.S1_at	DT456083	Ghi.9090	6.09524	0	gb:DT456083 /DB_XREF=gi:73847063 /DB_XREF=GH_ON11E05.f /CLONE=GH_ON11E05 /TID=Ghi.9090.1 /CNT=6 /FEA=EST /TIER=ConsEnd /STK=0 /UG=Ghi.9090 /UG_TITLE=Transcribed locus /REP_ORG=G. hirsutum
GhiAffx.49861.2.A1_s_at	DW488878.1	Ghi.13542	6.08915	0	gb:DW488878.1 dbest_id:35093306 /TID=GhiAffx.49861.2 /CNT=2 /FEA=EST /TIER=ConsEnd /STK=0 /NOTE=sequence(s) not in UniGene /REP_ORG=
GhiAffx.46892.1.A1_at	DT459815	Ghi.17765	6.07167	0	gb:DT459815 /DB_XREF=gi:73850795 /DB_XREF=GH_ON38E19.r /CLONE=GH_ON38E19 /TID=GhiAffx.46892.1 /CNT=2 /FEA=EST /TIER=ConsEnd /STK=0 /NOTE=sequence(s) not in UniGene /REP_ORG=G. hirsutum
Ghi.3767.1.A1_at	DT555325	Ghi.3767	6.06163	0	gb:DT555325 /DB_XREF=gi:78335051 /DB_XREF=EST1065965 /TID=Ghi.3767.1 /CNT=6 /FEA=EST /TIER=ConsEnd /STK=1 /UG=Ghi.3767 /UG_TITLE=Transcribed locus, moderately similar to NP_565214.1 unknown protein (Arabidopsis thaliana) /REP_ORG=G. hirsutum
Ghi.3743.1.S1_at	DT462103	Ghi.3743	6.05955	0.0366566	gb:DT462103 /DB_XREF=gi:73859364 /DB_XREF=GH_CHX08G03.x /CLONE=GH_CHX08G03 /TID=Ghi.3743.1 /CNT=1 /FEA=EST /TIER=ConsEnd /STK=0 /UG=Ghi.3743 /UG_TITLE=Transcribed locus, weakly similar to NP_178199.1 WRKY40; transcription factor (Arabidopsis thaliana) /REP_ORG=G. hirsutum
Ghi.3234.2.A1_at	DT468165	Ghi.3354	6.04402	0	gb:DT468165 /DB_XREF=gi:73865427 /DB_XREF=GH_CHX21H19.r /CLONE=GH_CHX21H19 /TID=Ghi.3234.2 /CNT=3 /FEA=EST /TIER=ConsEnd /STK=0 /UG=Ghi.3234 /UG_TITLE=Transcribed locus, strongly similar to NP_188744.3 NADK1; NAD+ kinase (Arabidopsis thaliana) /REP_ORG=G. hirsutum
Ghi.7946.1.A1_at	AI055148	Ghi.17043	6.0393	0	gb:AI055148 /DB_XREF=gi:3326262 /DB_XREF=coau0003C20 /CLONE=coau0003C20 /TID=Ghi.7946.1 /CNT=2 /FEA=EST /TIER=ConsEnd /STK=0 /UG=Ghi.7946 /UG_TITLE=Transcribed locus /REP_ORG=G. hirsutum
Ghi.688.1.S1_at	DR456188	Ghi.688	6.03255	0	gb:DR456188 /DB_XREF=gi:84167540 /DB_XREF=CM042B05 /TID=Ghi.688.1 /CNT=1 /FEA=EST /TIER=ConsEnd /STK=0 /UG=Ghi.688 /UG_TITLE=Transcribed locus /REP_ORG=G. hirsutum
Ghi.3080.1.S1_at	DT527374	Ghi.3080	6.02083	0	gb:DT527374 /DB_XREF=gi:73944066 /DB_XREF=GH_OCF07H09.f /CLONE=GH_OCF07H09 /TID=Ghi.3080.1 /CNT=1 /FEA=EST /TIER=ConsEnd /STK=0 /UG=Ghi.3080 /UG_TITLE=Transcribed locus /REP_ORG=G. hirsutum
Ghi.6621.1.A1_s_at	CA993084	Ghi.6621	6.00617	0	gb:CA993084 /DB_XREF=gi:31072805 /DB_XREF=pAR04E09 /TID=Ghi.6621.1 /CNT=2 /FEA=EST /TIER=ConsEnd /STK=0 /UG=Ghi.6621 /UG_TITLE=Transcribed locus /REP_ORG=G. hirsutum
GraAffx.23160.1.S1_s_at	CO123237	---	6.00457	0	gb:CO123237 /DB_XREF=gi:48821924 /DB_XREF=GR__Eb05E11.f /CLONE=GR__Eb05E11 /TID=GraAffx.23160.1 /CNT=2 /FEA=EST /TIER=ConsEnd /STK=0 /NOTE=sequence(s) not in UniGene /REP_ORG=G. raimondii
Ghi.1581.1.S1_at	DN762414	Ghi.1581	6.00295	0	gb:DN762414 /DB_XREF=gi:84148172 /DB_XREF=G.hir-stem 2309 /TID=Ghi.1581.1 /CNT=1 /FEA=EST /TIER=ConsEnd /STK=0 /UG=Ghi.1581 /UG_TITLE=Transcribed locus, weakly similar to NP_198138.2 unknown protein (Arabidopsis thaliana) /REP_ORG=G. hirsutum
GraAffx.9185.1.S1_s_at	CO086828	---	6.00046	0	gb:CO086828 /DB_XREF=gi:48777462 /DB_XREF=GR__Ea05A04.r /CLONE=GR__Ea05A04 /TID=GraAffx.9185.1 /CNT=2 /FEA=EST /TIER=ConsEnd /STK=1 /NOTE=sequence(s) not in UniGene /REP_ORG=G. raimondii
GraAffx.9655.1.S1_s_at	CO084627	---	5.98729	0	gb:CO084627 /DB_XREF=gi:48775261 /DB_XREF=GR__Ea01F13.r /CLONE=GR__Ea01F13 /TID=GraAffx.9655.1 /CNT=2 /FEA=EST /TIER=ConsEnd /STK=1 /NOTE=sequence(s) not in UniGene /REP_ORG=G. raimondii
Ghi.3284.1.S1_s_at	DT466688	Ghi.3284	5.97888	1.84408	gb:DT466688 /DB_XREF=gi:73863949 /DB_XREF=GH_CHX19D23.r /CLONE=GH_CHX19D23 /TID=Ghi.3284.1 /CNT=56 /FEA=EST /TIER=Stack /STK=14 /UG=Ghi.3284 /UG_TITLE=Transcribed locus, moderately similar to XP_463361.1 B1097D05.23 (Oryza sativa (japonica cultivar-group)) /REP_ORG=G. hirsutum
GhiAffx.12599.1.A1_at	DT468341	Ghi.17957	5.9756	0	gb:DT468341 /DB_XREF=gi:73865603 /DB_XREF=GH_CHX21L18.r /CLONE=GH_CHX21L18 /TID=GhiAffx.12599.1 /CNT=2 /FEA=EST /TIER=ConsEnd /STK=1 /NOTE=sequence(s) not in UniGene /REP_ORG=G. hirsutum
GhiAffx.24810.1.S1_at	DW513058.1	Ghi.611	5.97428	0	gb:DW513058.1 dbest_id:35118841 /TID=GhiAffx.24810.1 /CNT=2 /FEA=EST /TIER=ConsEnd /STK=1 /NOTE=sequence(s) not in UniGene /REP_ORG=
Ghi.7946.1.S1_at	AI055148	Ghi.17043	5.96698	0	gb:AI055148 /DB_XREF=gi:3326262 /DB_XREF=coau0003C20 /CLONE=coau0003C20 /TID=Ghi.7946.1 /CNT=2 /FEA=EST /TIER=ConsEnd /STK=0 /UG=Ghi.7946 /UG_TITLE=Transcribed locus /REP_ORG=G. hirsutum
Ghi.2294.2.A1_at	DT464190	---	5.9556	0	gb:DT464190 /DB_XREF=gi:73861451 /DB_XREF=GH_CHX15D04.r /CLONE=GH_CHX15D04 /TID=Ghi.2294.2 /CNT=1 /FEA=EST /TIER=ConsEnd /STK=1 /UG=Ghi.2294 /UG_TITLE=Transcribed locus, strongly similar to NP_176768.1 isocitrate dehydrogenase (NADP+) oxidoreductase (Arabidopsis thaliana) /REP_ORG=G. hirsutum
Ghi.4156.1.S1_s_at	DT457230	Ghi.4156	5.95247	0	gb:DT457230 /DB_XREF=gi:73848210 /DB_XREF=GH_ON34D20.r /CLONE=GH_ON34D20 /TID=Ghi.4156.1 /CNT=3 /FEA=EST /TIER=ConsEnd /STK=1 /UG=Ghi.4156 /UG_TITLE=Transcribed locus /REP_ORG=G. hirsutum
Ghi.4118.1.A1_x_at	DT457752	Ghi.4118	5.95215	0	gb:DT457752 /DB_XREF=gi:73848732 /DB_XREF=GH_ON35A08.r /CLONE=GH_ON35A08 /TID=Ghi.4118.1 /CNT=2 /FEA=EST /TIER=ConsEnd /STK=1 /UG=Ghi.4118 /UG_TITLE=Transcribed locus /REP_ORG=G. hirsutum
Ghi.9150.1.S1_at	DT463688	Ghi.9150	5.94582	0	gb:DT463688 /DB_XREF=gi:73860949 /DB_XREF=GH_CHX13O22.r /CLONE=GH_CHX13O22 /TID=Ghi.9150.1 /CNT=2 /FEA=EST /TIER=ConsEnd /STK=1 /UG=Ghi.9150 /UG_TITLE=Transcribed locus /REP_ORG=G. hirsutum
Ghi.5825.1.A1_s_at	CO499506	Ghi.5825	5.92769	0	gb:CO499506 /DB_XREF=gi:54123997 /DB_XREF=G.h.fbr-sw08896 /TID=Ghi.5825.1 /CNT=4 /FEA=EST /TIER=ConsEnd /STK=0 /UG=Ghi.5825 /UG_TITLE=Transcribed locus, moderately similar to XP_473296.1 OSJNBb0039L24.13 (Oryza sativa (japonica cultivar-group)) /REP_ORG=G. hirsutum
Ghi.8837.2.S1_s_at	DT456134	Ghi.8837	5.9275	0	gb:DT456134 /DB_XREF=gi:73847114 /DB_XREF=GH_ON12B03.f /CLONE=GH_ON12B03 /TID=Ghi.8837.2 /CNT=2 /FEA=EST /TIER=ConsEnd /STK=0 /UG=Ghi.8837 /UG_TITLE=Transcribed locus /REP_ORG=G. hirsutum
GhiAffx.2217.1.A1_at	DT457924	Ghi.13735	5.92708	0	gb:DT457924 /DB_XREF=gi:73848904 /DB_XREF=GH_ON35E20.r /CLONE=GH_ON35E20 /TID=GhiAffx.2217.1 /CNT=3 /FEA=EST /TIER=ConsEnd /STK=1 /NOTE=sequence(s) not in UniGene /REP_ORG=G. hirsutum
GraAffx.5073.1.S1_at	CO121179	---	5.92554	0	gb:CO121179 /DB_XREF=gi:48819866 /DB_XREF=GR__Eb02E01.f /CLONE=GR__Eb02E01 /TID=GraAffx.5073.1 /CNT=3 /FEA=EST /TIER=ConsEnd /STK=0 /NOTE=sequence(s) not in UniGene /REP_ORG=G. raimondii
Ghi.5057.1.S1_s_at	DT049270	---	5.90637	0	gb:DT049270 /DB_XREF=gi:72273667 /DB_XREF=COT_DK_G10 /TID=Ghi.5057.1 /CNT=1 /FEA=EST /TIER=ConsEnd /STK=1 /UG=Ghi.5057 /UG_TITLE=Transcribed locus, weakly similar to NP_171721.3 catalytic (Arabidopsis thaliana) /REP_ORG=G. hirsutum
GhiAffx.50664.1.A1_at	DT052475	Ghi.19335	5.90267	0	gb:DT052475 /DB_XREF=gi:72280315 /DB_XREF=COT_FC_H03 /TID=GhiAffx.50664.1 /CNT=2 /FEA=EST /TIER=ConsEnd /STK=1 /NOTE=sequence(s) not in UniGene /REP_ORG=G. hirsutum
Ghi.10329.1.S1_at	DT466921	Ghi.10329	5.89935	0.0627412	gb:DT466921 /DB_XREF=gi:73864182 /DB_XREF=GH_CHX19J21.r /CLONE=GH_CHX19J21 /TID=Ghi.10329.1 /CNT=16 /FEA=EST /TIER=ConsEnd /STK=1 /UG=Ghi.10329 /UG_TITLE=Transcribed locus, moderately similar to XP_478905.1 chitin-inducible gibberellin-responsive protein (Oryza sativa (japonica cultivar-group)) /REP_ORG=G. hirsutum
GhiAffx.10266.1.S1_at	DT463428	---	5.88855	0	gb:DT463428 /DB_XREF=gi:73860689 /DB_XREF=GH_CHX13I17.r /CLONE=GH_CHX13I17 /TID=GhiAffx.10266.1 /CNT=2 /FEA=EST /TIER=ConsEnd /STK=1 /NOTE=sequence(s) not in UniGene /REP_ORG=G. hirsutum
Ghi.1739.4.S1_x_at	DT464580	Ghi.17807	5.87653	0.0366566	gb:DT464580 /DB_XREF=gi:73861841 /DB_XREF=GH_CHX15O14.r /CLONE=GH_CHX15O14 /TID=Ghi.1739.4 /CNT=1 /FEA=EST /TIER=ConsEnd /STK=1 /UG=Ghi.1739 /UG_TITLE=Transcribed locus, moderately similar to NP_177396.1 iron ion binding lipoxygenase (Arabidopsis thaliana) /REP_ORG=G. hirsutum
GhiAffx.18371.1.S1_a_at	DW234191.1	Ghi.15580	5.87597	0	gb:DW234191.1 dbest_id:34838357 /TID=GhiAffx.18371.1 /CNT=8 /FEA=EST /TIER=ConsEnd /STK=1 /NOTE=sequence(s) not in UniGene /REP_ORG=
Ghi.9779.2.S1_at	DT467498	Ghi.17311	5.87299	0	gb:DT467498 /DB_XREF=gi:73864759 /DB_XREF=GH_CHX20I05.r /CLONE=GH_CHX20I05 /TID=Ghi.9779.2 /CNT=1 /FEA=EST /TIER=ConsEnd /STK=1 /UG=Ghi.9779 /UG_TITLE=Transcribed locus, strongly similar to NP_180863.1 hydrogen-transporting ATP synthase, rotational mechanism hydrogen-transporting ATPase, rotational mechanism (Arabidopsis thaliana) /REP_ORG=G. hirsutum
Ghi.8924.1.S1_s_at	DT458174	Ghi.8924	5.86908	0	gb:DT458174 /DB_XREF=gi:73849154 /DB_XREF=GH_ON35L15.r /CLONE=GH_ON35L15 /TID=Ghi.8924.1 /CNT=3 /FEA=EST /TIER=ConsEnd /STK=1 /UG=Ghi.8924 /UG_TITLE=Transcribed locus, moderately similar to NP_914660.1 putative response regulator (Oryza sativa (japonica cultivar-group)) /REP_ORG=G. hirsutum
Ghi.3142.1.A1_s_at	DT469041	Ghi.13506	5.86477	0	gb:DT469041 /DB_XREF=gi:73866303 /DB_XREF=GH_CHX22N19.r /CLONE=GH_CHX22N19 /TID=Ghi.3142.1 /CNT=3 /FEA=EST /TIER=ConsEnd /STK=1 /UG=Ghi.3142 /UG_TITLE=Transcribed locus /REP_ORG=G. hirsutum
Ghi.6812.1.S1_at	CA993049	Ghi.6812	5.86085	0	gb:CA993049 /DB_XREF=gi:31072770 /DB_XREF=pAR04A06 /TID=Ghi.6812.1 /CNT=1 /FEA=EST /TIER=ConsEnd /STK=0 /UG=Ghi.6812 /UG_TITLE=Transcribed locus, moderately similar to NP_683398.1 unknown protein (Arabidopsis thaliana) /REP_ORG=G. hirsutum
GhiAffx.5993.1.S1_at	DN760116	Ghi.1602	5.85951	0	gb:DN760116 /DB_XREF=gi:84145874 /DB_XREF=G.hir-stem 2623 /TID=GhiAffx.5993.1 /CNT=3 /FEA=EST /TIER=ConsEnd /STK=0 /NOTE=sequence(s) not in UniGene /REP_ORG=G. hirsutum
Ghi.3381.1.S1_x_at	DT466623	Ghi.16487	5.85682	0	gb:DT466623 /DB_XREF=gi:73863884 /DB_XREF=GH_CHX19C10.r /CLONE=GH_CHX19C10 /TID=Ghi.3381.1 /CNT=7 /FEA=EST /TIER=ConsEnd /STK=1 /UG=Ghi.3381 /UG_TITLE=Transcribed locus, moderately similar to NP_850311.1 ATP binding kinase protein kinase protein serinethreonine kinase protein-tyrosine kinase (Arabidopsis thaliana) /REP_ORG=G. hirsutum
GhiAffx.4078.1.S1_s_at	DW487004.1	Ghi.5252	5.85384	0	gb:DW487004.1 dbest_id:35091432 /TID=GhiAffx.4078.1 /CNT=5 /FEA=EST /TIER=ConsEnd /STK=0 /NOTE=sequence(s) not in UniGene /REP_ORG=
Ghi.6539.2.S1_at	DT467086	Ghi.9213	5.80793	0	gb:DT467086 /DB_XREF=gi:73864347 /DB_XREF=GH_CHX19N17.r /CLONE=GH_CHX19N17 /TID=Ghi.6539.2 /CNT=2 /FEA=EST /TIER=ConsEnd /STK=1 /UG=Ghi.6539 /UG_TITLE=Transcribed locus, weakly similar to NP_181529.1 unknown protein (Arabidopsis thaliana) /REP_ORG=G. hirsutum
GhiAffx.4691.1.A1_at	DW517948.1	Ghi.15255	5.80357	0	gb:DW517948.1 dbest_id:35123731 /TID=GhiAffx.4691.1 /CNT=7 /FEA=EST /TIER=ConsEnd /STK=2 /NOTE=sequence(s) not in UniGene /REP_ORG=
Ghi.2240.1.S1_s_at	DR457472	Ghi.2240	5.79503	0	gb:DR457472 /DB_XREF=gi:84168824 /DB_XREF=CM055F03 /TID=Ghi.2240.1 /CNT=1 /FEA=EST /TIER=ConsEnd /STK=0 /UG=Ghi.2240 /UG_TITLE=Transcribed locus /REP_ORG=G. hirsutum
GhiAffx.2752.1.S1_at	CA993163	Ghi.14054	5.78677	0	gb:CA993163 /DB_XREF=gi:31072884 /DB_XREF=pAR05A08 /TID=GhiAffx.2752.1 /CNT=3 /FEA=EST /TIER=ConsEnd /STK=0 /NOTE=sequence(s) not in UniGene /REP_ORG=G. hirsutum
Ghi.992.1.S1_s_at	DR452424	Ghi.992	5.78622	0	gb:DR452424 /DB_XREF=gi:84163776 /DB_XREF=CM002E03 /TID=Ghi.992.1 /CNT=1 /FEA=EST /TIER=ConsEnd /STK=0 /UG=Ghi.992 /UG_TITLE=Transcribed locus /REP_ORG=G. hirsutum
Ghi.8939.1.A1_at	DT458638	Ghi.16271	5.77997	0	gb:DT458638 /DB_XREF=gi:73849618 /DB_XREF=GH_ON36H07.r /CLONE=GH_ON36H07 /TID=Ghi.8939.1 /CNT=3 /FEA=EST /TIER=ConsEnd /STK=1 /UG=Ghi.8939 /UG_TITLE=Transcribed locus /REP_ORG=G. hirsutum
GhiAffx.7363.1.S1_at	DW511008.1	Ghi.15745	5.77504	0	gb:DW511008.1 dbest_id:35116791 /TID=GhiAffx.7363.1 /CNT=5 /FEA=EST /TIER=ConsEnd /STK=0 /NOTE=sequence(s) not in UniGene /REP_ORG=
Ghi.6752.1.S1_at	CA993331	Ghi.10331	5.76412	0	gb:CA993331 /DB_XREF=gi:31073052 /DB_XREF=pAR06H10 /TID=Ghi.6752.1 /CNT=7 /FEA=EST /TIER=ConsEnd /STK=0 /UG=Ghi.6752 /UG_TITLE=Transcribed locus /REP_ORG=G. hirsutum
Ghi.729.1.S1_at	DR455493	Ghi.729	5.74512	0	gb:DR455493 /DB_XREF=gi:84166845 /DB_XREF=CM034G12 /TID=Ghi.729.1 /CNT=1 /FEA=EST /TIER=ConsEnd /STK=0 /UG=Ghi.729 /UG_TITLE=Transcribed locus /REP_ORG=G. hirsutum
Ghi.872.1.S1_at	DR453802	Ghi.872	5.74268	0	gb:DR453802 /DB_XREF=gi:84165154 /DB_XREF=CM017B02 /TID=Ghi.872.1 /CNT=1 /FEA=EST /TIER=ConsEnd /STK=0 /UG=Ghi.872 /UG_TITLE=Transcribed locus, moderately similar to NP_565811.2 MOR1 (MICROTUBULE ORGANIZATION 1) (Arabidopsis thaliana) /REP_ORG=G. hirsutum
Ghi.5183.2.A1_x_at	DT527400	Ghi.16590	5.74194	0	gb:DT527400 /DB_XREF=gi:73944092 /DB_XREF=GH_OCF08C08.f /CLONE=GH_OCF08C08 /TID=Ghi.5183.2 /CNT=1 /FEA=EST /TIER=ConsEnd /STK=0 /UG=Ghi.5183 /UG_TITLE=Transcribed locus /REP_ORG=G. hirsutum
Ghi.3615.2.S1_s_at	DT461611	Ghi.3615	5.73169	0	gb:DT461611 /DB_XREF=gi:73858872 /DB_XREF=GH_CHX02D07.x /CLONE=GH_CHX02D07 /TID=Ghi.3615.2 /CNT=1 /FEA=EST /TIER=ConsEnd /STK=0 /UG=Ghi.3615 /UG_TITLE=Transcribed locus, weakly similar to NP_180484.2 unknown protein (Arabidopsis thaliana) /REP_ORG=G. hirsutum
Ghi.3282.1.A1_x_at	DT467689	Ghi.3282	5.72369	0.00854976	gb:DT467689 /DB_XREF=gi:73864950 /DB_XREF=GH_CHX20M19.r /CLONE=GH_CHX20M19 /TID=Ghi.3282.1 /CNT=1 /FEA=EST /TIER=ConsEnd /STK=1 /UG=Ghi.3282 /UG_TITLE=Transcribed locus, weakly similar to NP_564075.1 unknown protein (Arabidopsis thaliana) /REP_ORG=G. hirsutum
GhiAffx.48556.1.S1_at	DW509522.1	Ghi.21833	5.72364	0	gb:DW509522.1 dbest_id:35115305 /TID=GhiAffx.48556.1 /CNT=2 /FEA=EST /TIER=ConsEnd /STK=1 /NOTE=sequence(s) not in UniGene /REP_ORG=
Ghi.4051.1.A1_at	DT458605	Ghi.4051	5.69986	0	gb:DT458605 /DB_XREF=gi:73849585 /DB_XREF=GH_ON36G12.r /CLONE=GH_ON36G12 /TID=Ghi.4051.1 /CNT=4 /FEA=EST /TIER=ConsEnd /STK=0 /UG=Ghi.4051 /UG_TITLE=Transcribed locus /REP_ORG=G. hirsutum
GhiAffx.40637.2.S1_at	DW225598.1	Ghi.11831	5.69986	0	gb:DW225598.1 dbest_id:34829770 /TID=GhiAffx.40637.2 /CNT=6 /FEA=EST /TIER=ConsEnd /STK=0 /NOTE=sequence(s) not in UniGene /REP_ORG=
Ghi.7881.1.S1_at	DR459980	Ghi.7881	5.69764	0	gb:DR459980 /DB_XREF=gi:84171332 /DB_XREF=CM082A03 /TID=Ghi.7881.1 /CNT=1 /FEA=EST /TIER=ConsEnd /STK=0 /UG=Ghi.7881 /UG_TITLE=Transcribed locus /REP_ORG=G. hirsutum
Ghi.3368.1.S1_at	DN799970	Ghi.3368	5.69099	0	gb:DN799970 /DB_XREF=gi:84150615 /DB_XREF=G.hir-cold stressed seedling 156 /TID=Ghi.3368.1 /CNT=3 /FEA=EST /TIER=ConsEnd /STK=0 /UG=Ghi.3368 /UG_TITLE=Transcribed locus /REP_ORG=G. hirsutum
GhiAffx.31314.1.S1_s_at	DT463222	Ghi.15636	5.68752	0	gb:DT463222 /DB_XREF=gi:73860483 /DB_XREF=GH_CHX13D24.r /CLONE=GH_CHX13D24 /TID=GhiAffx.31314.1 /CNT=4 /FEA=EST /TIER=ConsEnd /STK=1 /NOTE=sequence(s) not in UniGene /REP_ORG=G. hirsutum
Ghi.721.1.A1_s_at	DR455675	Ghi.721	5.67836	0	gb:DR455675 /DB_XREF=gi:84167027 /DB_XREF=CM036G04 /TID=Ghi.721.1 /CNT=1 /FEA=EST /TIER=ConsEnd /STK=0 /UG=Ghi.721 /UG_TITLE=Transcribed locus /REP_ORG=G. hirsutum
Ghi.8750.1.A1_at	DT469095	Ghi.5130	5.67346	0.114153	gb:DT469095 /DB_XREF=gi:73866357 /DB_XREF=GH_CHX22P07.r /CLONE=GH_CHX22P07 /TID=Ghi.8750.1 /CNT=2 /FEA=EST /TIER=ConsEnd /STK=2 /UG=Ghi.8750 /UG_TITLE=Transcribed locus, moderately similar to NP_198748.1 UDP-glucose 6-dehydrogenase (Arabidopsis thaliana) /REP_ORG=G. hirsutum
Ghi.7077.1.S1_s_at	AI054553	Ghi.7077	5.67189	0	gb:AI054553 /DB_XREF=gi:3325667 /DB_XREF=coau0001F20 /CLONE=coau0001F20 /TID=Ghi.7077.1 /CNT=10 /FEA=EST /TIER=ConsEnd /STK=0 /UG=Ghi.7077 /UG_TITLE=Transcribed locus, moderately similar to NP_197849.1 unknown protein (Arabidopsis thaliana) /REP_ORG=G. hirsutum
GhiAffx.16582.1.A1_at	DW491068.1	Ghi.15316	5.66451	0	gb:DW491068.1 dbest_id:35095496 /TID=GhiAffx.16582.1 /CNT=4 /FEA=EST /TIER=ConsEnd /STK=0 /NOTE=sequence(s) not in UniGene /REP_ORG=
Ghi.3442.3.A1_at	DT459595	Ghi.16317	5.65825	0	gb:DT459595 /DB_XREF=gi:73850575 /DB_XREF=GH_ON37O15.r /CLONE=GH_ON37O15 /TID=Ghi.3442.3 /CNT=2 /FEA=EST /TIER=ConsEnd /STK=0 /UG=Ghi.3442 /UG_TITLE=Transcribed locus, moderately similar to NP_563728.1 unknown protein (Arabidopsis thaliana) /REP_ORG=G. hirsutum
Ghi.6680.1.A1_at	CA993710	Ghi.6680	5.64632	0	gb:CA993710 /DB_XREF=gi:31073431 /DB_XREF=pAR09G06 /TID=Ghi.6680.1 /CNT=1 /FEA=EST /TIER=ConsEnd /STK=0 /UG=Ghi.6680 /UG_TITLE=Transcribed locus /REP_ORG=G. hirsutum
Ghi.3615.1.S1_s_at	DT463750	Ghi.3615	5.63173	0	gb:DT463750 /DB_XREF=gi:73861011 /DB_XREF=GH_CHX14A16.r /CLONE=GH_CHX14A16 /TID=Ghi.3615.1 /CNT=2 /FEA=EST /TIER=ConsEnd /STK=0 /UG=Ghi.3615 /UG_TITLE=Transcribed locus, weakly similar to NP_180484.2 unknown protein (Arabidopsis thaliana) /REP_ORG=G. hirsutum
GraAffx.25057.1.A1_at	CO099254	---	5.62878	0	gb:CO099254 /DB_XREF=gi:48797940 /DB_XREF=GR__Ea24A13.r /CLONE=GR__Ea24A13 /TID=GraAffx.25057.1 /CNT=5 /FEA=EST /TIER=ConsEnd /STK=1 /NOTE=sequence(s) not in UniGene /REP_ORG=G. raimondii
GraAffx.31246.1.S1_at	CO101627	---	5.6239	0	gb:CO101627 /DB_XREF=gi:48800313 /DB_XREF=GR__Eb0028D10.f /CLONE=GR__Eb0028D10 /TID=GraAffx.31246.1 /CNT=3 /FEA=EST /TIER=ConsEnd /STK=0 /NOTE=sequence(s) not in UniGene /REP_ORG=G. raimondii
Ghi.9336.3.S1_at	DT464617	Ghi.9336	5.62268	0	gb:DT464617 /DB_XREF=gi:73861878 /DB_XREF=GH_CHX15P18.r /CLONE=GH_CHX15P18 /TID=Ghi.9336.3 /CNT=2 /FEA=EST /TIER=ConsEnd /STK=1 /UG=Ghi.9336 /UG_TITLE=Transcribed locus, weakly similar to XP_475971.1 putative calcium-dependent protein kinase (Oryza sativa (japonica cultivar-group)) /REP_ORG=G. hirsutum
Ghi.8294.2.S1_at	AI731982	Ghi.8294	5.6191	0	gb:AI731982 /DB_XREF=gi:5050834 /DB_XREF=BNLGHi10385 /TID=Ghi.8294.2 /CNT=4 /FEA=EST /TIER=ConsEnd /STK=0 /UG=Ghi.8294 /UG_TITLE=Transcribed locus, moderately similar to NP_177315.1 ATCK1 (CHOLINE KINASE) (Arabidopsis thaliana) /REP_ORG=G. hirsutum
GhiAffx.25530.1.A1_at	DW516811.1	---	5.61303	0	gb:DW516811.1 dbest_id:35122594 /TID=GhiAffx.25530.1 /CNT=2 /FEA=EST /TIER=ConsEnd /STK=1 /NOTE=sequence(s) not in UniGene /REP_ORG=
Ghi.2356.1.S1_at	DN758102	Ghi.2356	5.60954	0	gb:DN758102 /DB_XREF=gi:84143860 /DB_XREF=G.hir-stem 606 /TID=Ghi.2356.1 /CNT=2 /FEA=EST /TIER=ConsEnd /STK=0 /UG=Ghi.2356 /UG_TITLE=Transcribed locus, weakly similar to NP_192945.2 DNA binding (Arabidopsis thaliana) /REP_ORG=G. hirsutum
GhiAffx.14560.1.A1_s_at	DW233922.1	Ghi.15709	5.59293	0	gb:DW233922.1 dbest_id:34838088 /TID=GhiAffx.14560.1 /CNT=5 /FEA=EST /TIER=ConsEnd /STK=0 /NOTE=sequence(s) not in UniGene /REP_ORG=
GhiAffx.6667.1.A1_s_at	DW503015.1	---	5.59205	0	gb:DW503015.1 dbest_id:35107443 /TID=GhiAffx.6667.1 /CNT=1 /FEA=EST /TIER=ConsEnd /STK=1 /NOTE=sequence(s) not in UniGene /REP_ORG=
GhiAffx.24842.2.A1_a_at	DW515880.1	Ghi.16857	5.58653	0	gb:DW515880.1 dbest_id:35121663 /TID=GhiAffx.24842.2 /CNT=1 /FEA=EST /TIER=ConsEnd /STK=1 /NOTE=sequence(s) not in UniGene /REP_ORG=
Ghi.8688.1.A1_at	DT049790	Ghi.13328	5.5802	0	gb:DT049790 /DB_XREF=gi:72274702 /DB_XREF=COT_DR_C12 /TID=Ghi.8688.1 /CNT=3 /FEA=EST /TIER=ConsEnd /STK=1 /UG=Ghi.8688 /UG_TITLE=Transcribed locus /REP_ORG=G. hirsutum
GraAffx.26779.1.S1_at	CO091212	---	5.57806	0	gb:CO091212 /DB_XREF=gi:48789898 /DB_XREF=GR__Ea11J09.r /CLONE=GR__Ea11J09 /TID=GraAffx.26779.1 /CNT=3 /FEA=EST /TIER=ConsEnd /STK=1 /NOTE=sequence(s) not in UniGene /REP_ORG=G. raimondii
Ghi.342.1.S1_at	DT459322	Ghi.342	5.56673	0	gb:DT459322 /DB_XREF=gi:73850302 /DB_XREF=GH_ON37I01.r /CLONE=GH_ON37I01 /TID=Ghi.342.1 /CNT=3 /FEA=EST /TIER=ConsEnd /STK=1 /UG=Ghi.342 /UG_TITLE=Transcribed locus, weakly similar to NP_566981.1 unknown protein (Arabidopsis thaliana) /REP_ORG=G. hirsutum
GhiAffx.7011.1.S1_a_at	DW512137.1	Ghi.12112	5.55018	0	gb:DW512137.1 dbest_id:35117920 /TID=GhiAffx.7011.1 /CNT=2 /FEA=EST /TIER=ConsEnd /STK=1 /NOTE=sequence(s) not in UniGene /REP_ORG=
GhiAffx.7290.1.S1_at	DW510236.1	Ghi.17101	5.54771	0	gb:DW510236.1 dbest_id:35116019 /TID=GhiAffx.7290.1 /CNT=2 /FEA=EST /TIER=ConsEnd /STK=1 /NOTE=sequence(s) not in UniGene /REP_ORG=
Ghi.2105.2.S1_at	DT468831	Ghi.2105	5.53868	0	gb:DT468831 /DB_XREF=gi:73866093 /DB_XREF=GH_CHX22I08.r /CLONE=GH_CHX22I08 /TID=Ghi.2105.2 /CNT=3 /FEA=EST /TIER=ConsEnd /STK=0 /UG=Ghi.2105 /UG_TITLE=Transcribed locus /REP_ORG=G. hirsutum
GhiAffx.6393.1.S1_at	DW500009.1	Ghi.11178	5.534	0	gb:DW500009.1 dbest_id:35104437 /TID=GhiAffx.6393.1 /CNT=3 /FEA=EST /TIER=ConsEnd /STK=0 /NOTE=sequence(s) not in UniGene /REP_ORG=
GhiAffx.33672.1.S1_at	DW508660.1	Ghi.18699	5.53261	0	gb:DW508660.1 dbest_id:35114443 /TID=GhiAffx.33672.1 /CNT=2 /FEA=EST /TIER=ConsEnd /STK=0 /NOTE=sequence(s) not in UniGene /REP_ORG=
Ghi.6108.1.A1_s_at	DT464542	Ghi.8483	5.53005	0	gb:DT464542 /DB_XREF=gi:73861803 /DB_XREF=GH_CHX15N06.r /CLONE=GH_CHX15N06 /TID=Ghi.6108.1 /CNT=3 /FEA=EST /TIER=ConsEnd /STK=0 /UG=Ghi.6108 /UG_TITLE=Transcribed locus, weakly similar to NP_180627.1 unknown protein (Arabidopsis thaliana) /REP_ORG=G. hirsutum
Ghi.3605.1.A1_at	DN759972	Ghi.3605	5.52307	0	gb:DN759972 /DB_XREF=gi:84145730 /DB_XREF=G.hir-stem 2479 /TID=Ghi.3605.1 /CNT=3 /FEA=EST /TIER=ConsEnd /STK=0 /UG=Ghi.3605 /UG_TITLE=Transcribed locus, weakly similar to NP_180233.1 AKT1 (ARABIDOPSIS K TRANSPORTER 1); cyclic nucleotide binding inward rectifier potassium channel (Arabidopsis thaliana) /REP_ORG=G. hirsutum
GraAffx.31660.1.A1_at	CO130420	---	5.516	0	gb:CO130420 /DB_XREF=gi:48879398 /DB_XREF=GR__Eb33C16.r /CLONE=GR__Eb33C16 /TID=GraAffx.31660.1 /CNT=7 /FEA=EST /TIER=ConsEnd /STK=1 /NOTE=sequence(s) not in UniGene /REP_ORG=G. raimondii
GhiAffx.13280.1.S1_x_at	DT458873	---	5.51264	0	gb:DT458873 /DB_XREF=gi:73849853 /DB_XREF=GH_ON36M20.r /CLONE=GH_ON36M20 /TID=GhiAffx.13280.1 /CNT=2 /FEA=EST /TIER=ConsEnd /STK=1 /NOTE=sequence(s) not in UniGene /REP_ORG=G. hirsutum
Ghi.2847.1.S1_s_at	DT465458	Ghi.2847	5.50706	0	gb:DT465458 /DB_XREF=gi:73862719 /DB_XREF=GH_CHX17G08.r /CLONE=GH_CHX17G08 /TID=Ghi.2847.1 /CNT=3 /FEA=EST /TIER=ConsEnd /STK=1 /UG=Ghi.2847 /UG_TITLE=Transcribed locus, moderately similar to NP_191010.1 ATEP3; chitinase (Arabidopsis thaliana) /REP_ORG=G. hirsutum
Gra.2938.2.A1_at	CO085472	Gra.1108	5.49845	0	gb:CO085472 /DB_XREF=gi:48776106 /DB_XREF=GR__Ea02K12.r /CLONE=GR__Ea02K12 /TID=Gra.2938.2 /CNT=3 /FEA=EST /TIER=ConsEnd /STK=1 /UG=Gra.2938 /UG_TITLE=Transcribed locus, moderately similar to XP_478512.1 putative thiamine biosynthesis protein (Oryza sativa (japonica cultivar-group)) /REP_ORG=G. raimondii
GraAffx.24476.1.A1_at	CO090811	---	5.49144	0	gb:CO090811 /DB_XREF=gi:48789497 /DB_XREF=GR__Ea10P16.r /CLONE=GR__Ea10P16 /TID=GraAffx.24476.1 /CNT=2 /FEA=EST /TIER=ConsEnd /STK=2 /NOTE=sequence(s) not in UniGene /REP_ORG=G. raimondii
Ghi.4678.1.A1_at	DT050523	Ghi.4678	5.49081	0	gb:DT050523 /DB_XREF=gi:72276214 /DB_XREF=COT_EA_E01 /TID=Ghi.4678.1 /CNT=5 /FEA=EST /TIER=ConsEnd /STK=5 /UG=Ghi.4678 /UG_TITLE=Transcribed locus /REP_ORG=G. hirsutum
GhiAffx.25088.1.A1_s_at	DW516683.1	Ghi.18545	5.49032	0	gb:DW516683.1 dbest_id:35122466 /TID=GhiAffx.25088.1 /CNT=2 /FEA=EST /TIER=ConsEnd /STK=1 /NOTE=sequence(s) not in UniGene /REP_ORG=
Ghi.8741.1.A1_at	DT052515	Ghi.8741	5.48766	0	gb:DT052515 /DB_XREF=gi:72280393 /DB_XREF=COT_FD_C11 /TID=Ghi.8741.1 /CNT=4 /FEA=EST /TIER=ConsEnd /STK=0 /UG=Ghi.8741 /UG_TITLE=Transcribed locus /REP_ORG=G. hirsutum
Ghi.6836.1.S1_s_at	CA992928	Ghi.2086	5.47213	0	gb:CA992928 /DB_XREF=gi:31072649 /DB_XREF=pAR03C09 /TID=Ghi.6836.1 /CNT=3 /FEA=EST /TIER=ConsEnd /STK=0 /UG=Ghi.6836 /UG_TITLE=Transcribed locus, strongly similar to NP_180524.1 catalytic (Arabidopsis thaliana) /REP_ORG=G. hirsutum
GhiAffx.40204.1.A1_at	DW497592.1	Ghi.21454	5.46838	0	gb:DW497592.1 dbest_id:35102020 /TID=GhiAffx.40204.1 /CNT=2 /FEA=EST /TIER=ConsEnd /STK=1 /NOTE=sequence(s) not in UniGene /REP_ORG=
GhiAffx.64021.1.S1_at	DW488255.1	Ghi.14113	5.46312	0	gb:DW488255.1 dbest_id:35092683 /TID=GhiAffx.64021.1 /CNT=4 /FEA=EST /TIER=ConsEnd /STK=0 /NOTE=sequence(s) not in UniGene /REP_ORG=
Ghi.3459.1.A1_at	DT465574	Ghi.3459	5.4578	0	gb:DT465574 /DB_XREF=gi:73862835 /DB_XREF=GH_CHX17J10.r /CLONE=GH_CHX17J10 /TID=Ghi.3459.1 /CNT=1 /FEA=EST /TIER=ConsEnd /STK=1 /UG=Ghi.3459 /UG_TITLE=Transcribed locus, moderately similar to NP_173005.1 PDR12; ATPase, coupled to transmembrane movement of substances (Arabidopsis thaliana) /REP_ORG=G. hirsutum
Ghi.311.2.S1_at	DT466214	Ghi.16317	5.45681	0	gb:DT466214 /DB_XREF=gi:73863475 /DB_XREF=GH_CHX18J01.f /CLONE=GH_CHX18J01 /TID=Ghi.311.2 /CNT=5 /FEA=EST /TIER=ConsEnd /STK=0 /UG=Ghi.311 /UG_TITLE=Transcribed locus, weakly similar to NP_187323.2 unknown protein (Arabidopsis thaliana) /REP_ORG=G. hirsutum
GhiAffx.24664.1.A1_at	DW512276.1	Ghi.21899	5.44724	0	gb:DW512276.1 dbest_id:35118059 /TID=GhiAffx.24664.1 /CNT=2 /FEA=EST /TIER=ConsEnd /STK=1 /NOTE=sequence(s) not in UniGene /REP_ORG=
Gra.1081.1.A1_s_at	CO077415	Gra.1081	5.44258	0	gb:CO077415 /DB_XREF=gi:48746896 /DB_XREF=GR__Ea39C22.r /CLONE=GR__Ea39C22 /TID=Gra.1081.1 /CNT=2 /FEA=EST /TIER=ConsEnd /STK=2 /UG=Gra.1081 /UG_TITLE=Transcribed locus, weakly similar to NP_565759.1 expressed protein (Arabidopsis thaliana) /REP_ORG=G. raimondii
GraAffx.16886.1.S1_at	CO077026	---	5.44013	0	gb:CO077026 /DB_XREF=gi:48746507 /DB_XREF=GR__Ea38K01.f /CLONE=GR__Ea38K01 /TID=GraAffx.16886.1 /CNT=2 /FEA=EST /TIER=ConsEnd /STK=0 /NOTE=sequence(s) not in UniGene /REP_ORG=G. raimondii
Ghi.8093.1.S1_at	AY138249.1	Ghi.8093	5.43588	0	gb:AY138249.1 /DB_XREF=gi:22795057 /TID=Ghi.8093.1 /CNT=1 /FEA=FLmRNA /TIER=FL /STK=1 /UG=Ghi.8093 /DEF=Gossypium hirsutum phospholipase D beta 1 isoform 1a mRNA, complete cds. /PROD=phospholipase D beta 1 isoform 1a /FL=gb:AY138249.1 /REP_ORG=G. hirsutum
GraAffx.15487.1.S1_s_at	CO124605	---	5.43179	0	gb:CO124605 /DB_XREF=gi:48823292 /DB_XREF=GR__Eb07J20.r /CLONE=GR__Eb07J20 /TID=GraAffx.15487.1 /CNT=2 /FEA=EST /TIER=ConsEnd /STK=1 /NOTE=sequence(s) not in UniGene /REP_ORG=G. raimondii
GhiAffx.34485.1.S1_at	DW496983.1	---	5.41405	0.0238141	gb:DW496983.1 dbest_id:35101411 /TID=GhiAffx.34485.1 /CNT=2 /FEA=EST /TIER=ConsEnd /STK=1 /NOTE=sequence(s) not in UniGene /REP_ORG=
GhiAffx.33220.1.S1_s_at	AW187407	Ghi.11259	5.40966	0	gb:AW187407 /DB_XREF=gi:6461843 /DB_XREF=BNLGHi13875 /TID=GhiAffx.33220.1 /CNT=3 /FEA=EST /TIER=ConsEnd /STK=0 /NOTE=sequence(s) not in UniGene /REP_ORG=G. hirsutum
Ghi.7073.1.S1_at	AW187437	Ghi.7073	5.40964	0	gb:AW187437 /DB_XREF=gi:6481339 /DB_XREF=BNLGHi5264 /TID=Ghi.7073.1 /CNT=1 /FEA=EST /TIER=ConsEnd /STK=0 /UG=Ghi.7073 /UG_TITLE=Transcribed locus, weakly similar to NP_564308.1 unknown protein (Arabidopsis thaliana) /REP_ORG=G. hirsutum
Ghi.5866.1.S1_s_at	DT466167	Ghi.5866	5.40587	0	gb:DT466167 /DB_XREF=gi:73863428 /DB_XREF=GH_CHX18H22.f /CLONE=GH_CHX18H22 /TID=Ghi.5866.1 /CNT=6 /FEA=EST /TIER=ConsEnd /STK=0 /UG=Ghi.5866 /UG_TITLE=Transcribed locus, moderately similar to NP_180988.3 O-acetyltransferase (Arabidopsis thaliana) /REP_ORG=G. hirsutum
Ghi.5971.1.A1_at	CO497706	Ghi.5971	5.39371	0	gb:CO497706 /DB_XREF=gi:54122197 /DB_XREF=G.h.fbr-sw07096 /TID=Ghi.5971.1 /CNT=1 /FEA=EST /TIER=ConsEnd /STK=0 /UG=Ghi.5971 /UG_TITLE=Transcribed locus /REP_ORG=G. hirsutum
Ghi.1261.1.S1_a_at	CO496100	Ghi.1261	5.38398	0	gb:CO496100 /DB_XREF=gi:54120591 /DB_XREF=G.h.fbr-sw05490 /TID=Ghi.1261.1 /CNT=11 /FEA=EST /TIER=ConsEnd /STK=0 /UG=Ghi.1261 /UG_TITLE=Transcribed locus, moderately similar to XP_473143.1 OSJNBa0004N05.7 (Oryza sativa (japonica cultivar-group)) /REP_ORG=G. hirsutum
Ghi.6433.1.A1_at	CK988080	Ghi.17307	5.37905	0.114153	gb:CK988080 /DB_XREF=gi:45595231 /DB_XREF=SP2-E8(P6-B2) /CLONE=SP2-E8(P6-B2) /TID=Ghi.6433.1 /CNT=124 /FEA=EST /TIER=ConsEnd /STK=0 /UG=Ghi.6433 /UG_TITLE=Transcribed locus, moderately similar to NP_179068.1 PR1 (PATHOGENESIS-RELATED GENE 1) (Arabidopsis thaliana) /REP_ORG=G. hirsutum
Ghi.8798.1.S1_at	DT456078	Ghi.8798	5.376	0.0333442	gb:DT456078 /DB_XREF=gi:73847058 /DB_XREF=GH_ON11D11.f /CLONE=GH_ON11D11 /TID=Ghi.8798.1 /CNT=2 /FEA=EST /TIER=ConsEnd /STK=1 /UG=Ghi.8798 /UG_TITLE=Transcribed locus /REP_ORG=G. hirsutum
Ghi.285.1.S1_x_at	DR461134	Ghi.3564	5.36676	0	gb:DR461134 /DB_XREF=gi:84172486 /DB_XREF=CM094B10 /TID=Ghi.285.1 /CNT=1 /FEA=EST /TIER=ConsEnd /STK=0 /UG=Ghi.285 /UG_TITLE=Transcribed locus /REP_ORG=G. hirsutum
GhiAffx.31145.1.S1_at	DT463995	Ghi.17878	5.36313	0	gb:DT463995 /DB_XREF=gi:73861256 /DB_XREF=GH_CHX14L23.r /CLONE=GH_CHX14L23 /TID=GhiAffx.31145.1 /CNT=2 /FEA=EST /TIER=ConsEnd /STK=1 /NOTE=sequence(s) not in UniGene /REP_ORG=G. hirsutum
Ghi.10466.2.S1_at	DN758171	Ghi.10466	5.35911	0	gb:DN758171 /DB_XREF=gi:84143929 /DB_XREF=G.hir-stem 675 /TID=Ghi.10466.2 /CNT=3 /FEA=EST /TIER=ConsEnd /STK=0 /UG=Ghi.10466 /UG_TITLE=Transcribed locus, moderately similar to NP_198545.1 unknown protein (Arabidopsis thaliana) /REP_ORG=G. hirsutum
Ghi.8983.1.S1_at	DT459532	Ghi.17760	5.35882	0	gb:DT459532 /DB_XREF=gi:73850512 /DB_XREF=GH_ON37N03.r /CLONE=GH_ON37N03 /TID=Ghi.8983.1 /CNT=3 /FEA=EST /TIER=ConsEnd /STK=1 /UG=Ghi.8983 /UG_TITLE=Transcribed locus, weakly similar to NP_191681.1 oxidoreductase (Arabidopsis thaliana) /REP_ORG=G. hirsutum
Ghi.5128.1.A1_at	DT048961	Ghi.5128	5.34868	0	gb:DT048961 /DB_XREF=gi:72273054 /DB_XREF=COT_DH_B02 /TID=Ghi.5128.1 /CNT=1 /FEA=EST /TIER=ConsEnd /STK=1 /UG=Ghi.5128 /UG_TITLE=Transcribed locus /REP_ORG=G. hirsutum
Ghi.1699.1.S1_at	DN759866	Ghi.1699	5.3455	0	gb:DN759866 /DB_XREF=gi:84145624 /DB_XREF=G.hir-stem 2373 /TID=Ghi.1699.1 /CNT=1 /FEA=EST /TIER=ConsEnd /STK=0 /UG=Ghi.1699 /UG_TITLE=Transcribed locus /REP_ORG=G. hirsutum
Ghi.6982.1.A1_x_at	AJ513446	Ghi.6982	5.33082	0	gb:AJ513446 /DB_XREF=gi:24976929 /DB_XREF=AJ513446 /CLONE=suo22c08r3 /TID=Ghi.6982.1 /CNT=3 /FEA=EST /TIER=ConsEnd /STK=0 /UG=Ghi.6982 /UG_TITLE=Transcribed locus /REP_ORG=G. hirsutum
GhiAffx.37268.1.S1_s_at	DR453664	Ghi.16411	5.31251	0	gb:DR453664 /DB_XREF=gi:84165016 /DB_XREF=CM015F06 /TID=GhiAffx.37268.1 /CNT=2 /FEA=EST /TIER=ConsEnd /STK=0 /NOTE=sequence(s) not in UniGene /REP_ORG=G. hirsutum
GhiAffx.24708.1.A1_s_at	DW512507.1	Ghi.3103	5.31246	0	gb:DW512507.1 dbest_id:35118290 /TID=GhiAffx.24708.1 /CNT=2 /FEA=EST /TIER=ConsEnd /STK=1 /NOTE=sequence(s) not in UniGene /REP_ORG=
Ghi.597.1.S1_at	DR457132	Ghi.597	5.30388	0	gb:DR457132 /DB_XREF=gi:84168484 /DB_XREF=CM052A08 /TID=Ghi.597.1 /CNT=1 /FEA=EST /TIER=ConsEnd /STK=0 /UG=Ghi.597 /UG_TITLE=Transcribed locus /REP_ORG=G. hirsutum
Ghi.713.1.S1_s_at	DR455773	Ghi.713	5.29541	0	gb:DR455773 /DB_XREF=gi:84167125 /DB_XREF=CM037G07 /TID=Ghi.713.1 /CNT=1 /FEA=EST /TIER=ConsEnd /STK=0 /UG=Ghi.713 /UG_TITLE=Transcribed locus /REP_ORG=G. hirsutum
GhiAffx.61873.1.S1_at	DW511760.1	Ghi.14083	5.29492	0	gb:DW511760.1 dbest_id:35117543 /TID=GhiAffx.61873.1 /CNT=3 /FEA=EST /TIER=ConsEnd /STK=0 /NOTE=sequence(s) not in UniGene /REP_ORG=
GhiAffx.12704.1.A1_s_at	DW239603.1	Ghi.9793	5.2924	0	gb:DW239603.1 dbest_id:34843769 /TID=GhiAffx.12704.1 /CNT=2 /FEA=EST /TIER=ConsEnd /STK=1 /NOTE=sequence(s) not in UniGene /REP_ORG=
Ghi.7891.1.S1_s_at	DT462224	Ghi.7891	5.29206	0	gb:DT462224 /DB_XREF=gi:73859485 /DB_XREF=GH_CHX10B08.x /CLONE=GH_CHX10B08 /TID=Ghi.7891.1 /CNT=5 /FEA=EST /TIER=ConsEnd /STK=0 /UG=Ghi.7891 /UG_TITLE=Transcribed locus, weakly similar to NP_171821.1 unknown protein (Arabidopsis thaliana) /REP_ORG=G. hirsutum
Ghi.8863.1.S1_s_at	DT456307	Ghi.8863	5.28627	0	gb:DT456307 /DB_XREF=gi:73847287 /DB_XREF=GH_ON14B12.f /CLONE=GH_ON14B12 /TID=Ghi.8863.1 /CNT=3 /FEA=EST /TIER=ConsEnd /STK=0 /UG=Ghi.8863 /UG_TITLE=Transcribed locus /REP_ORG=G. hirsutum
GhiAffx.7880.1.S1_at	DW498669.1	Ghi.15995	5.27975	0	gb:DW498669.1 dbest_id:35103097 /TID=GhiAffx.7880.1 /CNT=5 /FEA=EST /TIER=ConsEnd /STK=2 /NOTE=sequence(s) not in UniGene /REP_ORG=
GhiAffx.43407.1.S1_at	CA993283	Ghi.14052	5.27211	0.521504	gb:CA993283 /DB_XREF=gi:31073004 /DB_XREF=pAR06D06 /TID=GhiAffx.43407.1 /CNT=6 /FEA=EST /TIER=ConsEnd /STK=0 /NOTE=sequence(s) not in UniGene /REP_ORG=G. hirsutum
GhiAffx.63620.1.S1_at	DW505500.1	Ghi.15977	5.26641	0.257021	gb:DW505500.1 dbest_id:35111283 /TID=GhiAffx.63620.1 /CNT=9 /FEA=EST /TIER=ConsEnd /STK=0 /NOTE=sequence(s) not in UniGene /REP_ORG=
GhiAffx.13341.1.S1_at	DT458212	---	5.25838	0	gb:DT458212 /DB_XREF=gi:73849192 /DB_XREF=GH_ON35M16.f /CLONE=GH_ON35M16 /TID=GhiAffx.13341.1 /CNT=2 /FEA=EST /TIER=ConsEnd /STK=1 /NOTE=sequence(s) not in UniGene /REP_ORG=G. hirsutum
Ghi.3342.1.A1_s_at	DT462329	Ghi.3342	5.24023	0	gb:DT462329 /DB_XREF=gi:73859590 /DB_XREF=GH_CHX11D11.x /CLONE=GH_CHX11D11 /TID=Ghi.3342.1 /CNT=2 /FEA=EST /TIER=ConsEnd /STK=0 /UG=Ghi.3342 /UG_TITLE=Transcribed locus, weakly similar to NP_850278.1 protein binding ubiquitin-protein ligase zinc ion binding (Arabidopsis thaliana) /REP_ORG=G. hirsutum
GhiAffx.12569.1.A1_at	DT468739	---	5.23626	0	gb:DT468739 /DB_XREF=gi:73866001 /DB_XREF=GH_CHX22G01.r /CLONE=GH_CHX22G01 /TID=GhiAffx.12569.1 /CNT=2 /FEA=EST /TIER=ConsEnd /STK=1 /NOTE=sequence(s) not in UniGene /REP_ORG=G. hirsutum
Ghi.2847.2.S1_s_at	DN827265	Ghi.2847	5.23478	0	gb:DN827265 /DB_XREF=gi:84158218 /DB_XREF=G.hir-20, 30 hrs post inoculation 575 /TID=Ghi.2847.2 /CNT=9 /FEA=EST /TIER=ConsEnd /STK=0 /UG=Ghi.2847 /UG_TITLE=Transcribed locus, moderately similar to NP_191010.1 ATEP3; chitinase (Arabidopsis thaliana) /REP_ORG=G. hirsutum
Ghi.1348.1.S1_at	DN801279	Ghi.1348	5.22535	0	gb:DN801279 /DB_XREF=gi:84151924 /DB_XREF=G.hir-15-20 DAA bolls drought stressed 434 /TID=Ghi.1348.1 /CNT=1 /FEA=EST /TIER=ConsEnd /STK=0 /UG=Ghi.1348 /UG_TITLE=Transcribed locus /REP_ORG=G. hirsutum
GraAffx.27650.1.A1_s_at	CO102499	---	5.2244	0	gb:CO102499 /DB_XREF=gi:48801185 /DB_XREF=GR__Eb0029P17.r /CLONE=GR__Eb0029P17 /TID=GraAffx.27650.1 /CNT=7 /FEA=EST /TIER=ConsEnd /STK=2 /NOTE=sequence(s) not in UniGene /REP_ORG=G. raimondii
Ghi.10194.2.A1_at	DT460094	Ghi.10194	5.22396	0	gb:DT460094 /DB_XREF=gi:73851074 /DB_XREF=GH_ON38M04.r /CLONE=GH_ON38M04 /TID=Ghi.10194.2 /CNT=1 /FEA=EST /TIER=ConsEnd /STK=1 /UG=Ghi.10194 /UG_TITLE=Transcribed locus /REP_ORG=G. hirsutum
Ghi.9336.1.A1_at	DT459216	Ghi.9336	5.22159	0	gb:DT459216 /DB_XREF=gi:73850196 /DB_XREF=GH_ON37F09.r /CLONE=GH_ON37F09 /TID=Ghi.9336.1 /CNT=4 /FEA=EST /TIER=ConsEnd /STK=1 /UG=Ghi.9336 /UG_TITLE=Transcribed locus, weakly similar to XP_475971.1 putative calcium-dependent protein kinase (Oryza sativa (japonica cultivar-group)) /REP_ORG=G. hirsutum
GraAffx.13357.1.A1_at	CO130985	---	5.21625	0	gb:CO130985 /DB_XREF=gi:48879963 /DB_XREF=GR__Eb43A14.r /CLONE=GR__Eb43A14 /TID=GraAffx.13357.1 /CNT=9 /FEA=EST /TIER=ConsEnd /STK=1 /NOTE=sequence(s) not in UniGene /REP_ORG=G. raimondii
GhiAffx.62728.1.A1_at	DW516249.1	Ghi.5828	5.21055	0	gb:DW516249.1 dbest_id:35122032 /TID=GhiAffx.62728.1 /CNT=2 /FEA=EST /TIER=ConsEnd /STK=1 /NOTE=sequence(s) not in UniGene /REP_ORG=
GhiAffx.9683.1.A1_s_at	DR455407	Ghi.14632	5.20691	0	gb:DR455407 /DB_XREF=gi:84166759 /DB_XREF=CM033H10 /TID=GhiAffx.9683.1 /CNT=4 /FEA=EST /TIER=ConsEnd /STK=0 /NOTE=sequence(s) not in UniGene /REP_ORG=G. hirsutum
GhiAffx.5786.1.A1_s_at	DW234545.1	---	5.20206	0	gb:DW234545.1 dbest_id:34838711 /TID=GhiAffx.5786.1 /CNT=2 /FEA=EST /TIER=ConsEnd /STK=1 /NOTE=sequence(s) not in UniGene /REP_ORG=
Ghi.7863.1.S1_at	AI725494	Ghi.7863	5.19518	0	gb:AI725494 /DB_XREF=gi:5044277 /DB_XREF=BNLGHi11856 /TID=Ghi.7863.1 /CNT=1 /FEA=EST /TIER=ConsEnd /STK=0 /UG=Ghi.7863 /UG_TITLE=Transcribed locus, moderately similar to NP_568220.1 RNA binding nucleic acid binding (Arabidopsis thaliana) /REP_ORG=G. hirsutum
GhiAffx.39722.1.A1_at	DW230913.1	Ghi.22160	5.19458	0	gb:DW230913.1 dbest_id:34835085 /TID=GhiAffx.39722.1 /CNT=2 /FEA=EST /TIER=ConsEnd /STK=2 /NOTE=sequence(s) not in UniGene /REP_ORG=
Ghi.964.1.S1_s_at	DR452699	Ghi.964	5.17849	0	gb:DR452699 /DB_XREF=gi:84164051 /DB_XREF=CM005D10 /TID=Ghi.964.1 /CNT=1 /FEA=EST /TIER=ConsEnd /STK=0 /UG=Ghi.964 /UG_TITLE=Transcribed locus, moderately similar to NP_190479.1 RNA binding signal recognition particle binding (Arabidopsis thaliana) /REP_ORG=G. hirsutum
Ghi.3969.1.A1_at	DT459606	Ghi.3969	5.16363	0	gb:DT459606 /DB_XREF=gi:73850586 /DB_XREF=GH_ON37O22.r /CLONE=GH_ON37O22 /TID=Ghi.3969.1 /CNT=3 /FEA=EST /TIER=ConsEnd /STK=1 /UG=Ghi.3969 /UG_TITLE=Transcribed locus /REP_ORG=G. hirsutum
GhiAffx.30957.1.S1_s_at	DT468531	Ghi.19575	5.16227	0	gb:DT468531 /DB_XREF=gi:73865793 /DB_XREF=GH_CHX22A05.f /CLONE=GH_CHX22A05 /TID=GhiAffx.30957.1 /CNT=2 /FEA=EST /TIER=ConsEnd /STK=0 /NOTE=sequence(s) not in UniGene /REP_ORG=G. hirsutum
Ghi.744.1.S1_x_at	DT457324	Ghi.17528	5.15805	0	gb:DT457324 /DB_XREF=gi:73848304 /DB_XREF=GH_ON34G05.r /CLONE=GH_ON34G05 /TID=Ghi.744.1 /CNT=6 /FEA=EST /TIER=ConsEnd /STK=1 /UG=Ghi.744 /UG_TITLE=Transcribed locus, moderately similar to NP_565026.1 unknown protein (Arabidopsis thaliana) /REP_ORG=G. hirsutum
GhiAffx.59844.1.S1_at	DW237295.1	Ghi.16191	5.15451	0	gb:DW237295.1 dbest_id:34841461 /TID=GhiAffx.59844.1 /CNT=3 /FEA=EST /TIER=ConsEnd /STK=0 /NOTE=sequence(s) not in UniGene /REP_ORG=
Ghi.4248.1.A1_s_at	DT456550	Ghi.4248	5.14306	0	gb:DT456550 /DB_XREF=gi:73847530 /DB_XREF=GH_ON33A11.r /CLONE=GH_ON33A11 /TID=Ghi.4248.1 /CNT=3 /FEA=EST /TIER=ConsEnd /STK=1 /UG=Ghi.4248 /UG_TITLE=Transcribed locus, moderately similar to NP_198009.3 PWD (PHOSPHOGLUCAN WATER DIKINASE); catalytic (Arabidopsis thaliana) /REP_ORG=G. hirsutum
Ghi.3810.1.A1_at	DT461557	Ghi.3810	5.14047	0	gb:DT461557 /DB_XREF=gi:73858818 /DB_XREF=GH_CHX01G08.x /CLONE=GH_CHX01G08 /TID=Ghi.3810.1 /CNT=1 /FEA=EST /TIER=ConsEnd /STK=0 /UG=Ghi.3810 /UG_TITLE=Transcribed locus /REP_ORG=G. hirsutum
Ghi.9192.1.S1_s_at	DT468825	Ghi.9192	5.13856	0.0480414	gb:DT468825 /DB_XREF=gi:73866087 /DB_XREF=GH_CHX22I04.r /CLONE=GH_CHX22I04 /TID=Ghi.9192.1 /CNT=17 /FEA=EST /TIER=Stack /STK=6 /UG=Ghi.9192 /UG_TITLE=Transcribed locus, moderately similar to NP_178199.1 WRKY40; transcription factor (Arabidopsis thaliana) /REP_ORG=G. hirsutum
GbaAffx.179.1.S1_at	AY375343.1	---	5.1371	0	gb:AY375343.1 /DB_XREF=gi:35187465 /TID=GbaAffx.179.1 /CNT=1 /FEA=FLmRNA /TIER=FL /STK=1 /NOTE=sequence(s) not in UniGene /DEF=Gossypium barbadense fiber protein Fb32 mRNA, complete cds. /PROD=fiber protein Fb32 /FL=gb:AY375343.1 /REP_ORG=G. barbadense
Gra.1841.1.S1_s_at	CO100281	---	5.13051	0	gb:CO100281 /DB_XREF=gi:48798967 /DB_XREF=GR__Ea25J08.r /CLONE=GR__Ea25J08 /TID=Gra.1841.1 /CNT=3 /FEA=EST /TIER=ConsEnd /STK=1 /UG=Gra.1841 /UG_TITLE=Transcribed locus, weakly similar to NP_175749.1 leucine-rich repeat family protein protein kinase family protein (Arabidopsis thaliana) /REP_ORG=G. raimondii
Ghi.4635.1.A1_x_at	DT051785	Ghi.4635	5.12933	0	gb:DT051785 /DB_XREF=gi:72278944 /DB_XREF=COT_EQ_B10 /TID=Ghi.4635.1 /CNT=2 /FEA=EST /TIER=ConsEnd /STK=2 /UG=Ghi.4635 /UG_TITLE=Transcribed locus, moderately similar to NP_176109.2 unknown protein (Arabidopsis thaliana) /REP_ORG=G. hirsutum
Ghi.5129.1.S1_at	DT048960	Ghi.5129	5.10039	0	gb:DT048960 /DB_XREF=gi:72273052 /DB_XREF=COT_DH_A12 /TID=Ghi.5129.1 /CNT=2 /FEA=EST /TIER=ConsEnd /STK=1 /UG=Ghi.5129 /UG_TITLE=Transcribed locus /REP_ORG=G. hirsutum
Ghi.5418.1.A1_at	DT047820	Ghi.5418	5.09955	0	gb:DT047820 /DB_XREF=gi:72270770 /DB_XREF=COT_CS_G03 /TID=Ghi.5418.1 /CNT=1 /FEA=EST /TIER=ConsEnd /STK=1 /UG=Ghi.5418 /UG_TITLE=Transcribed locus /REP_ORG=G. hirsutum
GhiAffx.42090.1.S1_at	DW506388.1	---	5.09793	0	gb:DW506388.1 dbest_id:35112171 /TID=GhiAffx.42090.1 /CNT=1 /FEA=EST /TIER=ConsEnd /STK=0 /NOTE=sequence(s) not in UniGene /REP_ORG=
Ghi.3103.1.S1_s_at	DT527159	Ghi.3103	5.09485	0	gb:DT527159 /DB_XREF=gi:73943851 /DB_XREF=GH_OCF05E01.f /CLONE=GH_OCF05E01 /TID=Ghi.3103.1 /CNT=1 /FEA=EST /TIER=ConsEnd /STK=0 /UG=Ghi.3103 /UG_TITLE=Transcribed locus /REP_ORG=G. hirsutum
Ghi.1671.1.S1_at	DN760070	Ghi.1671	5.09354	0	gb:DN760070 /DB_XREF=gi:84145828 /DB_XREF=G.hir-stem 2577 /TID=Ghi.1671.1 /CNT=1 /FEA=EST /TIER=ConsEnd /STK=0 /UG=Ghi.1671 /UG_TITLE=Transcribed locus, moderately similar to XP_472679.1 OSJNBa0086B14.21 (Oryza sativa (japonica cultivar-group)) /REP_ORG=G. hirsutum
Ghi.8745.1.A1_at	CA993566	Ghi.8745	5.07526	0	gb:CA993566 /DB_XREF=gi:31073287 /DB_XREF=pAR08G07 /TID=Ghi.8745.1 /CNT=3 /FEA=EST /TIER=ConsEnd /STK=0 /UG=Ghi.8745 /UG_TITLE=Transcribed locus, moderately similar to NP_566139.1 protein tyrosineserinethreonine phosphatase (Arabidopsis thaliana) /REP_ORG=G. hirsutum
GhiAffx.39985.1.A1_at	DW502884.1	Ghi.18513	5.07502	0	gb:DW502884.1 dbest_id:35107312 /TID=GhiAffx.39985.1 /CNT=2 /FEA=EST /TIER=ConsEnd /STK=1 /NOTE=sequence(s) not in UniGene /REP_ORG=
Ghi.9871.1.S1_at	DT046884	Ghi.9871	5.05897	0	gb:DT046884 /DB_XREF=gi:72268761 /DB_XREF=COT_CE_A02 /TID=Ghi.9871.1 /CNT=9 /FEA=EST /TIER=ConsEnd /STK=1 /UG=Ghi.9871 /UG_TITLE=Transcribed locus, weakly similar to NP_565096.1 unknown protein (Arabidopsis thaliana) /REP_ORG=G. hirsutum
Ghi.4248.1.S1_s_at	DT456043	Ghi.4248	5.05725	0	gb:DT456043 /DB_XREF=gi:73847023 /DB_XREF=GH_ON11A06.f /CLONE=GH_ON11A06 /TID=Ghi.4248.1 /CNT=3 /FEA=EST /TIER=ConsEnd /STK=0 /UG=Ghi.4248 /UG_TITLE=Transcribed locus, moderately similar to NP_198009.3 PWD (PHOSPHOGLUCAN WATER DIKINASE); catalytic (Arabidopsis thaliana) /REP_ORG=G. hirsutum
Ghi.7063.1.S1_x_at	AW187273	Ghi.7063	5.05267	0	gb:AW187273 /DB_XREF=gi:6481320 /DB_XREF=BNLGHi12320 /TID=Ghi.7063.1 /CNT=3 /FEA=EST /TIER=ConsEnd /STK=2 /UG=Ghi.7063 /UG_TITLE=Transcribed locus, moderately similar to NP_567078.1 TXR1 (THAXTOMIN A RESISTANT 1) (Arabidopsis thaliana) /REP_ORG=G. hirsutum
Ghi.130.1.S1_at	DR462619	Ghi.130	5.04105	0	gb:DR462619 /DB_XREF=gi:84173971 /DB_XREF=CM109H01 /TID=Ghi.130.1 /CNT=1 /FEA=EST /TIER=ConsEnd /STK=0 /UG=Ghi.130 /UG_TITLE=Transcribed locus, moderately similar to NP_176917.2 ATREV3; DNA binding (Arabidopsis thaliana) /REP_ORG=G. hirsutum
Ghi.9788.1.S1_at	DN760011	Ghi.5020	5.03757	0	gb:DN760011 /DB_XREF=gi:84145769 /DB_XREF=G.hir-stem 2518 /TID=Ghi.9788.1 /CNT=6 /FEA=EST /TIER=ConsEnd /STK=0 /UG=Ghi.9788 /UG_TITLE=Transcribed locus, moderately similar to NP_180450.2 protein binding (Arabidopsis thaliana) /REP_ORG=G. hirsutum
Ghi.717.1.S1_at	DR455724	Ghi.717	5.02395	0	gb:DR455724 /DB_XREF=gi:84167076 /DB_XREF=CM037C05 /TID=Ghi.717.1 /CNT=1 /FEA=EST /TIER=ConsEnd /STK=0 /UG=Ghi.717 /UG_TITLE=Transcribed locus, moderately similar to NP_196446.1 YLS8; catalytic electron transporter (Arabidopsis thaliana) /REP_ORG=G. hirsutum
Ghi.9143.1.A1_at	DT463160	Ghi.17817	5.01514	0	gb:DT463160 /DB_XREF=gi:73860421 /DB_XREF=GH_CHX13C14.r /CLONE=GH_CHX13C14 /TID=Ghi.9143.1 /CNT=3 /FEA=EST /TIER=ConsEnd /STK=1 /UG=Ghi.9143 /UG_TITLE=Transcribed locus, weakly similar to NP_566335.1 nucleotide binding (Arabidopsis thaliana) /REP_ORG=G. hirsutum
Ghi.7105.1.S1_at	DT050308	Ghi.7105	5.00671	0	gb:DT050308 /DB_XREF=gi:72275788 /DB_XREF=COT_DX_G09 /TID=Ghi.7105.1 /CNT=5 /FEA=EST /TIER=ConsEnd /STK=1 /UG=Ghi.7105 /UG_TITLE=Transcribed locus, weakly similar to NP_198861.1 unknown protein (Arabidopsis thaliana) /REP_ORG=G. hirsutum
GraAffx.27688.1.A1_s_at	CO088690	---	5.0067	0	gb:CO088690 /DB_XREF=gi:48779324 /DB_XREF=GR__Ea07M16.r /CLONE=GR__Ea07M16 /TID=GraAffx.27688.1 /CNT=2 /FEA=EST /TIER=ConsEnd /STK=1 /NOTE=sequence(s) not in UniGene /REP_ORG=G. raimondii
Ghi.7411.1.S1_at	AI730975	Ghi.7411	5.00546	0	gb:AI730975 /DB_XREF=gi:5049827 /DB_XREF=BNLGHi8265 /TID=Ghi.7411.1 /CNT=4 /FEA=EST /TIER=ConsEnd /STK=0 /UG=Ghi.7411 /UG_TITLE=Transcribed locus, moderately similar to NP_914367.1 putative adaptor protein adaptin-like (Oryza sativa (japonica cultivar-group)) /REP_ORG=G. hirsutum
Ghi.3310.1.A1_s_at	DT467453	Ghi.3310	5.0042	0	gb:DT467453 /DB_XREF=gi:73864714 /DB_XREF=GH_CHX20H02.r /CLONE=GH_CHX20H02 /TID=Ghi.3310.1 /CNT=1 /FEA=EST /TIER=ConsEnd /STK=1 /UG=Ghi.3310 /UG_TITLE=Transcribed locus, moderately similar to NP_850234.1 dimethylallyltranstransferase (Arabidopsis thaliana) /REP_ORG=G. hirsutum
GhiAffx.14560.1.S1_at	DT462811	Ghi.15709	5	0	gb:DT462811 /DB_XREF=gi:73860072 /DB_XREF=GH_CHX12K06.f /CLONE=GH_CHX12K06 /TID=GhiAffx.14560.1 /CNT=5 /FEA=EST /TIER=ConsEnd /STK=0 /NOTE=sequence(s) not in UniGene /REP_ORG=G. hirsutum
Ghi.3465.1.A1_at	DT465508	Ghi.3465	4.99728	0	gb:DT465508 /DB_XREF=gi:73862769 /DB_XREF=GH_CHX17H18.r /CLONE=GH_CHX17H18 /TID=Ghi.3465.1 /CNT=3 /FEA=EST /TIER=ConsEnd /STK=1 /UG=Ghi.3465 /UG_TITLE=Transcribed locus, weakly similar to NP_569040.1 MAPKKK5; ATP binding kinase protein kinase protein serinethreonine kinase protein-tyrosine kinase (Arabidopsis thaliana) /REP_ORG=G. hirsutum
GhiAffx.32048.1.S1_at	DT050538	---	4.99635	0	gb:DT050538 /DB_XREF=gi:72276244 /DB_XREF=COT_EA_F12 /TID=GhiAffx.32048.1 /CNT=2 /FEA=EST /TIER=ConsEnd /STK=1 /NOTE=sequence(s) not in UniGene /REP_ORG=G. hirsutum
Ghi.3751.1.S1_s_at	DT462024	Ghi.3751	4.99312	0	gb:DT462024 /DB_XREF=gi:73859285 /DB_XREF=GH_CHX07F09.x /CLONE=GH_CHX07F09 /TID=Ghi.3751.1 /CNT=1 /FEA=EST /TIER=ConsEnd /STK=0 /UG=Ghi.3751 /UG_TITLE=Transcribed locus /REP_ORG=G. hirsutum
GhiAffx.39469.1.A1_at	DT050185	Ghi.19298	4.993	0	gb:DT050185 /DB_XREF=gi:72275543 /DB_XREF=COT_DW_D02 /TID=GhiAffx.39469.1 /CNT=2 /FEA=EST /TIER=ConsEnd /STK=1 /NOTE=sequence(s) not in UniGene /REP_ORG=G. hirsutum
GhiAffx.50595.1.A1_at	DW513538.1	---	4.99246	0	gb:DW513538.1 dbest_id:35119321 /TID=GhiAffx.50595.1 /CNT=2 /FEA=EST /TIER=ConsEnd /STK=0 /NOTE=sequence(s) not in UniGene /REP_ORG=
GhiAffx.34441.1.A1_at	DW502880.1	Ghi.8834	4.97986	0	gb:DW502880.1 dbest_id:35107308 /TID=GhiAffx.34441.1 /CNT=4 /FEA=EST /TIER=ConsEnd /STK=1 /NOTE=sequence(s) not in UniGene /REP_ORG=
GhiAffx.47045.1.S1_s_at	DW502321.1	Ghi.11747	4.97408	0	gb:DW502321.1 dbest_id:35106749 /TID=GhiAffx.47045.1 /CNT=5 /FEA=EST /TIER=ConsEnd /STK=0 /NOTE=sequence(s) not in UniGene /REP_ORG=
GraAffx.29836.1.A1_at	CO082453	---	4.97402	0	gb:CO082453 /DB_XREF=gi:48751934 /DB_XREF=GR__Ea47B04.r /CLONE=GR__Ea47B04 /TID=GraAffx.29836.1 /CNT=2 /FEA=EST /TIER=ConsEnd /STK=2 /NOTE=sequence(s) not in UniGene /REP_ORG=G. raimondii
Ghi.5108.2.A1_s_at	DT047246	Ghi.17593	4.97089	0	gb:DT047246 /DB_XREF=gi:72269619 /DB_XREF=COT_CL_G06 /TID=Ghi.5108.2 /CNT=2 /FEA=EST /TIER=ConsEnd /STK=1 /UG=Ghi.5108 /UG_TITLE=Transcribed locus, moderately similar to NP_195678.1 DNA binding (Arabidopsis thaliana) /REP_ORG=G. hirsutum
GhiAffx.12354.1.S1_at	DW515458.1	Ghi.15931	4.9669	0	gb:DW515458.1 dbest_id:35121241 /TID=GhiAffx.12354.1 /CNT=2 /FEA=EST /TIER=ConsEnd /STK=1 /NOTE=sequence(s) not in UniGene /REP_ORG=
Ghi.9280.3.A1_at	DT462248	Ghi.9280	4.96599	0	gb:DT462248 /DB_XREF=gi:73859509 /DB_XREF=GH_CHX10D12.x /CLONE=GH_CHX10D12 /TID=Ghi.9280.3 /CNT=4 /FEA=EST /TIER=ConsEnd /STK=0 /UG=Ghi.9280 /UG_TITLE=Transcribed locus, moderately similar to XP_473226.1 OSJNBa0019D11.23 (Oryza sativa (japonica cultivar-group)) /REP_ORG=G. hirsutum
Ghi.342.2.A1_at	DT051668	Ghi.342	4.95699	0	gb:DT051668 /DB_XREF=gi:72278709 /DB_XREF=COT_EO_F11 /TID=Ghi.342.2 /CNT=1 /FEA=EST /TIER=ConsEnd /STK=1 /UG=Ghi.342 /UG_TITLE=Transcribed locus, weakly similar to NP_566981.1 unknown protein (Arabidopsis thaliana) /REP_ORG=G. hirsutum
Ghi.549.1.S1_at	DR457954	Ghi.651	4.95649	0	gb:DR457954 /DB_XREF=gi:84169306 /DB_XREF=CM060F08 /TID=Ghi.549.1 /CNT=1 /FEA=EST /TIER=ConsEnd /STK=0 /UG=Ghi.549 /UG_TITLE=Transcribed locus, weakly similar to NP_564265.1 unknown protein (Arabidopsis thaliana) /REP_ORG=G. hirsutum
GhiAffx.24955.1.S1_at	DW513776.1	Ghi.11345	4.94975	0	gb:DW513776.1 dbest_id:35119559 /TID=GhiAffx.24955.1 /CNT=5 /FEA=EST /TIER=ConsEnd /STK=0 /NOTE=sequence(s) not in UniGene /REP_ORG=
GhiAffx.12693.1.S1_at	DT466766	Ghi.10748	4.94502	0	gb:DT466766 /DB_XREF=gi:73864027 /DB_XREF=GH_CHX19G02.r /CLONE=GH_CHX19G02 /TID=GhiAffx.12693.1 /CNT=2 /FEA=EST /TIER=ConsEnd /STK=0 /NOTE=sequence(s) not in UniGene /REP_ORG=G. hirsutum
GhiAffx.23296.1.S1_s_at	DW505153.1	---	4.94304	0	gb:DW505153.1 dbest_id:35110936 /TID=GhiAffx.23296.1 /CNT=2 /FEA=EST /TIER=ConsEnd /STK=1 /NOTE=sequence(s) not in UniGene /REP_ORG=
Ghi.5534.1.A1_at	DT047032	Ghi.5534	4.94297	0	gb:DT047032 /DB_XREF=gi:72269190 /DB_XREF=COT_CJ_B07 /TID=Ghi.5534.1 /CNT=2 /FEA=EST /TIER=ConsEnd /STK=2 /UG=Ghi.5534 /UG_TITLE=Transcribed locus /REP_ORG=G. hirsutum
Ghi.9325.1.A1_at	DT049119	Ghi.9325	4.92972	0	gb:DT049119 /DB_XREF=gi:72273368 /DB_XREF=COT_DJ_A05 /TID=Ghi.9325.1 /CNT=4 /FEA=EST /TIER=ConsEnd /STK=2 /UG=Ghi.9325 /UG_TITLE=Transcribed locus, strongly similar to NP_174479.1 ATP binding ATP-dependent helicase helicase nucleic acid binding (Arabidopsis thaliana) /REP_ORG=G. hirsutum
GraAffx.31947.1.A1_at	CO127212	Gra.3281	4.92489	0	gb:CO127212 /DB_XREF=gi:48828822 /DB_XREF=GR__Eb11K14.r /CLONE=GR__Eb11K14 /TID=GraAffx.31947.1 /CNT=3 /FEA=EST /TIER=ConsEnd /STK=1 /NOTE=sequence(s) not in UniGene /REP_ORG=G. raimondii
GraAffx.34269.1.A1_s_at	CO069453	---	4.91721	0	gb:CO069453 /DB_XREF=gi:48738934 /DB_XREF=GR__Ea26A16.r /CLONE=GR__Ea26A16 /TID=GraAffx.34269.1 /CNT=2 /FEA=EST /TIER=ConsEnd /STK=1 /NOTE=sequence(s) not in UniGene /REP_ORG=G. raimondii
Ghi.4298.1.A1_at	DT460744	Ghi.4298	4.91543	0	gb:DT460744 /DB_XREF=gi:73851724 /DB_XREF=GH_ON39M12.r /CLONE=GH_ON39M12 /TID=Ghi.4298.1 /CNT=1 /FEA=EST /TIER=ConsEnd /STK=1 /UG=Ghi.4298 /UG_TITLE=Transcribed locus /REP_ORG=G. hirsutum
Ghi.4695.1.A1_at	DT050582	Ghi.4695	4.90566	0	gb:DT050582 /DB_XREF=gi:72276332 /DB_XREF=COT_EB_C11 /TID=Ghi.4695.1 /CNT=6 /FEA=EST /TIER=ConsEnd /STK=5 /UG=Ghi.4695 /UG_TITLE=Transcribed locus /REP_ORG=G. hirsutum
Ghi.6905.1.A1_x_at	CA992665	Ghi.6905	4.9045	0	gb:CA992665 /DB_XREF=gi:31072386 /DB_XREF=pAR0022 /TID=Ghi.6905.1 /CNT=1 /FEA=EST /TIER=ConsEnd /STK=0 /UG=Ghi.6905 /UG_TITLE=Transcribed locus /REP_ORG=G. hirsutum
Ghi.4519.1.A1_x_at	DT052497	Ghi.4519	4.90292	0	gb:DT052497 /DB_XREF=gi:72280357 /DB_XREF=COT_FD_B02 /TID=Ghi.4519.1 /CNT=4 /FEA=EST /TIER=ConsEnd /STK=4 /UG=Ghi.4519 /UG_TITLE=Transcribed locus /REP_ORG=G. hirsutum
GhiAffx.22035.1.A1_at	DW498527.1	Ghi.3880	4.9023	0	gb:DW498527.1 dbest_id:35102955 /TID=GhiAffx.22035.1 /CNT=2 /FEA=EST /TIER=ConsEnd /STK=1 /NOTE=sequence(s) not in UniGene /REP_ORG=
GhiAffx.27528.2.S1_at	DW510873.1	Ghi.14478	4.89523	0	gb:DW510873.1 dbest_id:35116656 /TID=GhiAffx.27528.2 /CNT=2 /FEA=EST /TIER=ConsEnd /STK=1 /NOTE=sequence(s) not in UniGene /REP_ORG=
Ghi.4274.1.S1_at	DT455945	Ghi.4274	4.8897	0	gb:DT455945 /DB_XREF=gi:73846925 /DB_XREF=GH_ON05F10.f /CLONE=GH_ON05F10 /TID=Ghi.4274.1 /CNT=1 /FEA=EST /TIER=ConsEnd /STK=0 /UG=Ghi.4274 /UG_TITLE=Transcribed locus /REP_ORG=G. hirsutum
Ghi.3770.1.A1_at	DT461906	Ghi.3770	4.88959	0	gb:DT461906 /DB_XREF=gi:73859167 /DB_XREF=GH_CHX06B09.x /CLONE=GH_CHX06B09 /TID=Ghi.3770.1 /CNT=1 /FEA=EST /TIER=ConsEnd /STK=0 /UG=Ghi.3770 /UG_TITLE=Transcribed locus, weakly similar to NP_177852.2 ATP binding kinase protein kinase protein serinethreonine kinase protein-tyrosine kinase (Arabidopsis thaliana) /REP_ORG=G. hirsutum
Ghi.4650.1.A1_x_at	DR461773	Ghi.4650	4.88102	0	gb:DR461773 /DB_XREF=gi:84173125 /DB_XREF=CM100H12 /TID=Ghi.4650.1 /CNT=2 /FEA=EST /TIER=ConsEnd /STK=0 /UG=Ghi.4650 /UG_TITLE=Transcribed locus /REP_ORG=G. hirsutum
GhiAffx.3890.1.A1_at	DR457150	Ghi.10377	4.86693	0	gb:DR457150 /DB_XREF=gi:84168502 /DB_XREF=CM052C02 /TID=GhiAffx.3890.1 /CNT=3 /FEA=EST /TIER=ConsEnd /STK=0 /NOTE=sequence(s) not in UniGene /REP_ORG=G. hirsutum
Ghi.9344.1.S1_s_at	DT463193	Ghi.3028	4.86366	0	gb:DT463193 /DB_XREF=gi:73860454 /DB_XREF=GH_CHX13D07.r /CLONE=GH_CHX13D07 /TID=Ghi.9344.1 /CNT=3 /FEA=EST /TIER=ConsEnd /STK=1 /UG=Ghi.9344 /UG_TITLE=Transcribed locus, weakly similar to NP_563965.1 unknown protein (Arabidopsis thaliana) /REP_ORG=G. hirsutum
GhiAffx.12908.1.S1_at	DT463690	---	4.86347	0	gb:DT463690 /DB_XREF=gi:73860951 /DB_XREF=GH_CHX13O23.r /CLONE=GH_CHX13O23 /TID=GhiAffx.12908.1 /CNT=2 /FEA=EST /TIER=ConsEnd /STK=1 /NOTE=sequence(s) not in UniGene /REP_ORG=G. hirsutum
Ghi.3263.1.A1_at	DT467895	Ghi.3263	4.86146	0	gb:DT467895 /DB_XREF=gi:73865156 /DB_XREF=GH_CHX21B15.r /CLONE=GH_CHX21B15 /TID=Ghi.3263.1 /CNT=2 /FEA=EST /TIER=ConsEnd /STK=1 /UG=Ghi.3263 /UG_TITLE=Transcribed locus /REP_ORG=G. hirsutum
GhiAffx.16586.1.A1_at	DW237148.1	---	4.85983	0	gb:DW237148.1 dbest_id:34841314 /TID=GhiAffx.16586.1 /CNT=2 /FEA=EST /TIER=ConsEnd /STK=1 /NOTE=sequence(s) not in UniGene /REP_ORG=
Ghi.8963.1.A1_at	DT459169	Ghi.8963	4.859	0	gb:DT459169 /DB_XREF=gi:73850149 /DB_XREF=GH_ON37E04.r /CLONE=GH_ON37E04 /TID=Ghi.8963.1 /CNT=4 /FEA=EST /TIER=ConsEnd /STK=1 /UG=Ghi.8963 /UG_TITLE=Transcribed locus /REP_ORG=G. hirsutum
Ghi.4872.1.A1_at	DT050105	Ghi.4872	4.85735	0	gb:DT050105 /DB_XREF=gi:72275384 /DB_XREF=COT_DV_C08 /TID=Ghi.4872.1 /CNT=1 /FEA=EST /TIER=ConsEnd /STK=1 /UG=Ghi.4872 /UG_TITLE=Transcribed locus, moderately similar to NP_175130.1 kinase (Arabidopsis thaliana) /REP_ORG=G. hirsutum
Ghi.7084.1.S1_at	AW187099	Ghi.7084	4.8522	0	gb:AW187099 /DB_XREF=gi:6481314 /DB_XREF=BNLGHi9948 /TID=Ghi.7084.1 /CNT=1 /FEA=EST /TIER=ConsEnd /STK=1 /UG=Ghi.7084 /UG_TITLE=Transcribed locus /REP_ORG=G. hirsutum
GhiAffx.49705.1.A1_s_at	DT467419	Ghi.19649	4.84423	0	gb:DT467419 /DB_XREF=gi:73864680 /DB_XREF=GH_CHX20G04.r /CLONE=GH_CHX20G04 /TID=GhiAffx.49705.1 /CNT=1 /FEA=EST /TIER=ConsEnd /STK=1 /NOTE=sequence(s) not in UniGene /REP_ORG=G. hirsutum
Ghi.8071.1.S1_at	AF305067.1	Ghi.16410	4.8374	0	gb:AF305067.1 /DB_XREF=gi:10505375 /TID=Ghi.8071.1 /CNT=2 /FEA=FLmRNA /TIER=FL /STK=1 /UG=Ghi.8071 /DEF=Gossypium hirsutum clone PCPR10-16 PR protein class 10 mRNA, complete cds. /PROD=PR protein class 10 /FL=gb:AF305067.1 /REP_ORG=G. hirsutum
Ghi.1708.1.S1_at	DN759808	Ghi.15450	4.83732	0	gb:DN759808 /DB_XREF=gi:84145566 /DB_XREF=G.hir-stem 2315 /TID=Ghi.1708.1 /CNT=1 /FEA=EST /TIER=ConsEnd /STK=0 /UG=Ghi.1708 /UG_TITLE=Transcribed locus, weakly similar to NP_190681.2 nucleic acid binding protein binding zinc ion binding (Arabidopsis thaliana) /REP_ORG=G. hirsutum
Ghi.748.1.S1_s_at	DR455232	Ghi.748	4.8368	0	gb:DR455232 /DB_XREF=gi:84166584 /DB_XREF=CM032B02 /TID=Ghi.748.1 /CNT=1 /FEA=EST /TIER=ConsEnd /STK=0 /UG=Ghi.748 /UG_TITLE=Transcribed locus /REP_ORG=G. hirsutum
Ghi.7941.1.A1_at	AI055173	Ghi.7941	4.83679	0	gb:AI055173 /DB_XREF=gi:3326287 /DB_XREF=coau0003D23 /CLONE=coau0003D23 /TID=Ghi.7941.1 /CNT=1 /FEA=EST /TIER=ConsEnd /STK=0 /UG=Ghi.7941 /UG_TITLE=Transcribed locus /REP_ORG=G. hirsutum
GhiAffx.60205.1.S1_at	DW506672.1	Ghi.12663	4.83052	0	gb:DW506672.1 dbest_id:35112455 /TID=GhiAffx.60205.1 /CNT=3 /FEA=EST /TIER=ConsEnd /STK=0 /NOTE=sequence(s) not in UniGene /REP_ORG=
Gra.1569.1.A1_at	CO122539	---	4.82867	0	gb:CO122539 /DB_XREF=gi:48821226 /DB_XREF=GR__Eb04D14.f /CLONE=GR__Eb04D14 /TID=Gra.1569.1 /CNT=3 /FEA=EST /TIER=ConsEnd /STK=0 /UG=Gra.1569 /UG_TITLE=Transcribed locus, moderately similar to NP_915902.1 putative transcription factor HBP-1b (Oryza sativa (japonica cultivar-group)) /REP_ORG=G. raimondii
GhiAffx.21556.1.A1_at	DW479650.1	Ghi.15229	4.82759	0	gb:DW479650.1 dbest_id:35084078 /TID=GhiAffx.21556.1 /CNT=5 /FEA=EST /TIER=ConsEnd /STK=0 /NOTE=sequence(s) not in UniGene /REP_ORG=
Ghi.9262.1.A1_at	DT465454	Ghi.18982	4.82101	0	gb:DT465454 /DB_XREF=gi:73862715 /DB_XREF=GH_CHX17G06.r /CLONE=GH_CHX17G06 /TID=Ghi.9262.1 /CNT=4 /FEA=EST /TIER=ConsEnd /STK=1 /UG=Ghi.9262 /UG_TITLE=Transcribed locus, strongly similar to NP_568230.2 unknown protein (Arabidopsis thaliana) /REP_ORG=G. hirsutum
Ghi.352.1.S1_s_at	DR460506	Ghi.352	4.81894	0	gb:DR460506 /DB_XREF=gi:84171858 /DB_XREF=CM087E11 /TID=Ghi.352.1 /CNT=1 /FEA=EST /TIER=ConsEnd /STK=0 /UG=Ghi.352 /UG_TITLE=Transcribed locus /REP_ORG=G. hirsutum
GhiAffx.40815.1.S1_at	DW499662.1	---	4.81857	0	gb:DW499662.1 dbest_id:35104090 /TID=GhiAffx.40815.1 /CNT=2 /FEA=EST /TIER=ConsEnd /STK=1 /NOTE=sequence(s) not in UniGene /REP_ORG=
GhiAffx.40721.1.S1_at	DW499128.1	Ghi.11827	4.8055	0	gb:DW499128.1 dbest_id:35103556 /TID=GhiAffx.40721.1 /CNT=3 /FEA=EST /TIER=ConsEnd /STK=0 /NOTE=sequence(s) not in UniGene /REP_ORG=
Ghi.9282.1.S1_s_at	DT465999	Ghi.9282	4.80457	0	gb:DT465999 /DB_XREF=gi:73863260 /DB_XREF=GH_CHX18E03.f /CLONE=GH_CHX18E03 /TID=Ghi.9282.1 /CNT=7 /FEA=EST /TIER=ConsEnd /STK=0 /UG=Ghi.9282 /UG_TITLE=Transcribed locus, moderately similar to XP_483255.1 putative transcription factor RAU1 (Oryza sativa (japonica cultivar-group)) /REP_ORG=G. hirsutum
Ghi.1157.1.S1_s_at	DN759846	Ghi.1157	4.79946	0	gb:DN759846 /DB_XREF=gi:84145604 /DB_XREF=G.hir-stem 2353 /TID=Ghi.1157.1 /CNT=6 /FEA=EST /TIER=ConsEnd /STK=0 /UG=Ghi.1157 /UG_TITLE=Transcribed locus, weakly similar to NP_194393.3 unknown protein (Arabidopsis thaliana) /REP_ORG=G. hirsutum
GhiAffx.6933.1.A1_at	DW506328.1	---	4.79771	0	gb:DW506328.1 dbest_id:35112111 /TID=GhiAffx.6933.1 /CNT=2 /FEA=EST /TIER=ConsEnd /STK=1 /NOTE=sequence(s) not in UniGene /REP_ORG=
Ghi.4474.1.A1_at	DT052723	Ghi.4474	4.79462	0	gb:DT052723 /DB_XREF=gi:72280911 /DB_XREF=COT_FF_H05 /TID=Ghi.4474.1 /CNT=4 /FEA=EST /TIER=ConsEnd /STK=4 /UG=Ghi.4474 /UG_TITLE=Transcribed locus, moderately similar to NP_564963.1 unknown protein (Arabidopsis thaliana) /REP_ORG=G. hirsutum
GhiAffx.29423.1.S1_s_at	DW496670.1	Ghi.20994	4.79276	0	gb:DW496670.1 dbest_id:35101098 /TID=GhiAffx.29423.1 /CNT=3 /FEA=EST /TIER=ConsEnd /STK=0 /NOTE=sequence(s) not in UniGene /REP_ORG=
GhiAffx.28091.1.S1_at	DR455698	Ghi.12709	4.79195	0	gb:DR455698 /DB_XREF=gi:84167050 /DB_XREF=CM037A03 /TID=GhiAffx.28091.1 /CNT=5 /FEA=EST /TIER=ConsEnd /STK=0 /NOTE=sequence(s) not in UniGene /REP_ORG=G. hirsutum
Ghi.4438.1.A1_at	DT053009	Ghi.4438	4.78163	0	gb:DT053009 /DB_XREF=gi:72281503 /DB_XREF=COT_FJ_H05 /TID=Ghi.4438.1 /CNT=3 /FEA=EST /TIER=ConsEnd /STK=3 /UG=Ghi.4438 /UG_TITLE=Transcribed locus, weakly similar to NP_564376.1 3(2),5-bisphosphate nucleotidase inositol or phosphatidylinositol phosphatase (Arabidopsis thaliana) /REP_ORG=G. hirsutum
Ghi.10159.1.A1_s_at	DT049826	Ghi.10159	4.77823	0	gb:DT049826 /DB_XREF=gi:72274775 /DB_XREF=COT_DR_G03 /TID=Ghi.10159.1 /CNT=2 /FEA=EST /TIER=ConsEnd /STK=2 /UG=Ghi.10159 /UG_TITLE=Transcribed locus, weakly similar to XP_479803.1 putative AT-hook protein 1 (Oryza sativa (japonica cultivar-group)) /REP_ORG=G. hirsutum
Ghi.7603.1.S1_at	AI729024	Ghi.7603	4.7757	0	gb:AI729024 /DB_XREF=gi:5047876 /DB_XREF=BNLGHi12394 /TID=Ghi.7603.1 /CNT=1 /FEA=EST /TIER=ConsEnd /STK=0 /UG=Ghi.7603 /UG_TITLE=Transcribed locus /REP_ORG=G. hirsutum
Ghi.8698.1.A1_at	DT051273	Ghi.8698	4.76885	0	gb:DT051273 /DB_XREF=gi:72277831 /DB_XREF=COT_EK_A10 /TID=Ghi.8698.1 /CNT=3 /FEA=EST /TIER=ConsEnd /STK=0 /UG=Ghi.8698 /UG_TITLE=Transcribed locus, strongly similar to NP_180198.1 GPA1 (G PROTEIN ALPHA SUBUNIT 1); signal transducer (Arabidopsis thaliana) /REP_ORG=G. hirsutum
Ghi.2022.1.A1_at	DT049644	Ghi.2022	4.7645	0	gb:DT049644 /DB_XREF=gi:72274413 /DB_XREF=COT_DP_E03 /TID=Ghi.2022.1 /CNT=2 /FEA=EST /TIER=ConsEnd /STK=2 /UG=Ghi.2022 /UG_TITLE=Transcribed locus /REP_ORG=G. hirsutum
Ghi.350.1.S1_at	DR460543	Ghi.350	4.76366	0	gb:DR460543 /DB_XREF=gi:84171895 /DB_XREF=CM088A01 /TID=Ghi.350.1 /CNT=1 /FEA=EST /TIER=ConsEnd /STK=0 /UG=Ghi.350 /UG_TITLE=Transcribed locus /REP_ORG=G. hirsutum
GhiAffx.52839.1.A1_x_at	DW224339.1	Ghi.19295	4.75569	0	gb:DW224339.1 dbest_id:34828511 /TID=GhiAffx.52839.1 /CNT=2 /FEA=EST /TIER=ConsEnd /STK=1 /NOTE=sequence(s) not in UniGene /REP_ORG=
GhiAffx.37564.1.S1_at	DW487283.1	Ghi.13478	4.74839	0	gb:DW487283.1 dbest_id:35091711 /TID=GhiAffx.37564.1 /CNT=3 /FEA=EST /TIER=ConsEnd /STK=0 /NOTE=sequence(s) not in UniGene /REP_ORG=
Ghi.3234.2.S1_s_at	DT466967	Ghi.3354	4.73757	0	gb:DT466967 /DB_XREF=gi:73864228 /DB_XREF=GH_CHX19K23.f /CLONE=GH_CHX19K23 /TID=Ghi.3234.2 /CNT=3 /FEA=EST /TIER=ConsEnd /STK=0 /UG=Ghi.3234 /UG_TITLE=Transcribed locus, strongly similar to NP_188744.3 NADK1; NAD+ kinase (Arabidopsis thaliana) /REP_ORG=G. hirsutum
Ghi.7728.1.S1_at	AI727487	Ghi.7728	4.73316	0	gb:AI727487 /DB_XREF=gi:5046339 /DB_XREF=BNLGHi8280 /TID=Ghi.7728.1 /CNT=3 /FEA=EST /TIER=ConsEnd /STK=0 /UG=Ghi.7728 /UG_TITLE=Transcribed locus, moderately similar to NP_564717.1 heat shock protein binding unfolded protein binding (Arabidopsis thaliana) /REP_ORG=G. hirsutum
Ghi.3213.1.A1_at	DT468363	Ghi.3213	4.7331	0	gb:DT468363 /DB_XREF=gi:73865625 /DB_XREF=GH_CHX21M05.r /CLONE=GH_CHX21M05 /TID=Ghi.3213.1 /CNT=1 /FEA=EST /TIER=ConsEnd /STK=1 /UG=Ghi.3213 /UG_TITLE=Transcribed locus /REP_ORG=G. hirsutum
GraAffx.17922.1.A1_s_at	CO091668	---	4.73136	0	gb:CO091668 /DB_XREF=gi:48790354 /DB_XREF=GR__Ea12E13.r /CLONE=GR__Ea12E13 /TID=GraAffx.17922.1 /CNT=4 /FEA=EST /TIER=ConsEnd /STK=2 /NOTE=sequence(s) not in UniGene /REP_ORG=G. raimondii
Ghi.3533.3.A1_at	DT047857	Ghi.3533	4.73015	0	gb:DT047857 /DB_XREF=gi:72270843 /DB_XREF=COT_CT_B12 /TID=Ghi.3533.3 /CNT=3 /FEA=EST /TIER=ConsEnd /STK=0 /UG=Ghi.3533 /UG_TITLE=Transcribed locus /REP_ORG=G. hirsutum
GhiAffx.12552.1.S1_at	DT468965	Ghi.16071	4.7266	0	gb:DT468965 /DB_XREF=gi:73866227 /DB_XREF=GH_CHX22L22.r /CLONE=GH_CHX22L22 /TID=GhiAffx.12552.1 /CNT=4 /FEA=EST /TIER=ConsEnd /STK=1 /NOTE=sequence(s) not in UniGene /REP_ORG=G. hirsutum
GhiAffx.33980.1.A1_at	DW514762.1	---	4.72575	0	gb:DW514762.1 dbest_id:35120545 /TID=GhiAffx.33980.1 /CNT=2 /FEA=EST /TIER=ConsEnd /STK=1 /NOTE=sequence(s) not in UniGene /REP_ORG=
Ghi.515.1.A1_s_at	DR458615	Ghi.4364	4.71264	0	gb:DR458615 /DB_XREF=gi:84169967 /DB_XREF=CM067F03 /TID=Ghi.515.1 /CNT=3 /FEA=EST /TIER=ConsEnd /STK=0 /UG=Ghi.515 /UG_TITLE=Transcribed locus, moderately similar to NP_564717.1 heat shock protein binding unfolded protein binding (Arabidopsis thaliana) /REP_ORG=G. hirsutum
Ghi.455.1.S1_at	DR459416	Ghi.455	4.70584	0	gb:DR459416 /DB_XREF=gi:84170768 /DB_XREF=CM076A11 /TID=Ghi.455.1 /CNT=1 /FEA=EST /TIER=ConsEnd /STK=0 /UG=Ghi.455 /UG_TITLE=Transcribed locus /REP_ORG=G. hirsutum
GraAffx.27710.1.S1_s_at	CO106932	---	4.70503	0	gb:CO106932 /DB_XREF=gi:48805618 /DB_XREF=GR__Eb0037N04.f /CLONE=GR__Eb0037N04 /TID=GraAffx.27710.1 /CNT=3 /FEA=EST /TIER=ConsEnd /STK=0 /NOTE=sequence(s) not in UniGene /REP_ORG=G. raimondii
Ghi.1108.1.S1_at	DN817519	Ghi.1108	4.70396	0	gb:DN817519 /DB_XREF=gi:84156293 /DB_XREF=G.hir-seedling 719 /TID=Ghi.1108.1 /CNT=1 /FEA=EST /TIER=ConsEnd /STK=0 /UG=Ghi.1108 /UG_TITLE=Transcribed locus /REP_ORG=G. hirsutum
GhiAffx.47887.1.A1_at	DT458662	Ghi.19430	4.70048	0	gb:DT458662 /DB_XREF=gi:73849642 /DB_XREF=GH_ON36H21.r /CLONE=GH_ON36H21 /TID=GhiAffx.47887.1 /CNT=2 /FEA=EST /TIER=ConsEnd /STK=1 /NOTE=sequence(s) not in UniGene /REP_ORG=G. hirsutum
GraAffx.27997.1.S1_s_at	CO087794	---	4.69752	0	gb:CO087794 /DB_XREF=gi:48778428 /DB_XREF=GR__Ea06G18.r /CLONE=GR__Ea06G18 /TID=GraAffx.27997.1 /CNT=4 /FEA=EST /TIER=ConsEnd /STK=1 /NOTE=sequence(s) not in UniGene /REP_ORG=G. raimondii
GhiAffx.43114.1.S1_s_at	DW511523.1	Ghi.6952	4.69633	0	gb:DW511523.1 dbest_id:35117306 /TID=GhiAffx.43114.1 /CNT=5 /FEA=EST /TIER=ConsEnd /STK=0 /NOTE=sequence(s) not in UniGene /REP_ORG=
GhiAffx.41021.1.S1_s_at	DN799888	Ghi.15581	4.69567	0	gb:DN799888 /DB_XREF=gi:84150533 /DB_XREF=G.hir-cold stressed seedling 74 /TID=GhiAffx.41021.1 /CNT=3 /FEA=EST /TIER=ConsEnd /STK=0 /NOTE=sequence(s) not in UniGene /REP_ORG=G. hirsutum
GhiAffx.27572.1.S1_s_at	DT468539	Ghi.19682	4.69279	0	gb:DT468539 /DB_XREF=gi:73865801 /DB_XREF=GH_CHX22A11.r /CLONE=GH_CHX22A11 /TID=GhiAffx.27572.1 /CNT=2 /FEA=EST /TIER=ConsEnd /STK=0 /NOTE=sequence(s) not in UniGene /REP_ORG=G. hirsutum
GhiAffx.16292.1.S1_at	DW229918.1	Ghi.6956	4.67584	0	gb:DW229918.1 dbest_id:34834090 /TID=GhiAffx.16292.1 /CNT=2 /FEA=EST /TIER=ConsEnd /STK=1 /NOTE=sequence(s) not in UniGene /REP_ORG=
Ghi.4975.2.S1_x_at	AI725550	Ghi.4975	4.6714	0	gb:AI725550 /DB_XREF=gi:5044333 /DB_XREF=BNLGHi12074 /TID=Ghi.4975.2 /CNT=1 /FEA=EST /TIER=ConsEnd /STK=0 /UG=Ghi.4975 /UG_TITLE=Transcribed locus, strongly similar to NP_177894.1 unknown protein (Arabidopsis thaliana) /REP_ORG=G. hirsutum
Ghi.434.1.S1_at	DT046913	Ghi.434	4.66528	0	gb:DT046913 /DB_XREF=gi:72268866 /DB_XREF=COT_CE_E01 /TID=Ghi.434.1 /CNT=5 /FEA=EST /TIER=ConsEnd /STK=1 /UG=Ghi.434 /UG_TITLE=Transcribed locus, weakly similar to NP_974912.1 unknown protein (Arabidopsis thaliana) /REP_ORG=G. hirsutum
Ghi.6693.1.A1_at	CA993655	Ghi.6693	4.66039	0	gb:CA993655 /DB_XREF=gi:31073376 /DB_XREF=pAR09B09 /TID=Ghi.6693.1 /CNT=1 /FEA=EST /TIER=ConsEnd /STK=0 /UG=Ghi.6693 /UG_TITLE=Transcribed locus /REP_ORG=G. hirsutum
Ghi.3257.1.A1_at	DT463788	Ghi.3257	4.66023	0	gb:DT463788 /DB_XREF=gi:73861049 /DB_XREF=GH_CHX14C07.r /CLONE=GH_CHX14C07 /TID=Ghi.3257.1 /CNT=3 /FEA=EST /TIER=ConsEnd /STK=1 /UG=Ghi.3257 /UG_TITLE=Transcribed locus, moderately similar to NP_182022.2 protein binding ubiquitin-protein ligase zinc ion binding (Arabidopsis thaliana) /REP_ORG=G. hirsutum
GraAffx.2599.1.A1_at	CO120255	---	4.65996	0	gb:CO120255 /DB_XREF=gi:48818942 /DB_XREF=GR__Eb023K11.r /CLONE=GR__Eb023K11 /TID=GraAffx.2599.1 /CNT=2 /FEA=EST /TIER=ConsEnd /STK=1 /NOTE=sequence(s) not in UniGene /REP_ORG=G. raimondii
GhiAffx.8242.1.S1_s_at	DW234222.1	Ghi.9194	4.65616	0	gb:DW234222.1 dbest_id:34838388 /TID=GhiAffx.8242.1 /CNT=3 /FEA=EST /TIER=ConsEnd /STK=1 /NOTE=sequence(s) not in UniGene /REP_ORG=
Gra.309.1.S1_at	CO104303	Gra.309	4.65164	0	gb:CO104303 /DB_XREF=gi:48802989 /DB_XREF=GR__Eb0033L14.f /CLONE=GR__Eb0033L14 /TID=Gra.309.1 /CNT=5 /FEA=EST /TIER=ConsEnd /STK=0 /UG=Gra.309 /UG_TITLE=Transcribed locus /REP_ORG=G. raimondii
GhiAffx.592.1.S1_at	DT051055	Ghi.12728	4.64872	0	gb:DT051055 /DB_XREF=gi:72277274 /DB_XREF=COT_EH_C12 /TID=GhiAffx.592.1 /CNT=3 /FEA=EST /TIER=ConsEnd /STK=2 /NOTE=sequence(s) not in UniGene /REP_ORG=G. hirsutum
Ghi.10488.1.S1_s_at	DN758435	Ghi.10488	4.64834	0	gb:DN758435 /DB_XREF=gi:84144193 /DB_XREF=G.hir-stem 939 /TID=Ghi.10488.1 /CNT=5 /FEA=EST /TIER=ConsEnd /STK=0 /UG=Ghi.10488 /UG_TITLE=Transcribed locus, weakly similar to NP_194141.2 ATP binding kinase protein kinase protein serinethreonine kinase protein-tyrosine kinase (Arabidopsis thaliana) /REP_ORG=G. hirsutum
Ghi.3958.1.A1_at	DT459754	Ghi.3958	4.64663	0	gb:DT459754 /DB_XREF=gi:73850734 /DB_XREF=GH_ON38D05.r /CLONE=GH_ON38D05 /TID=Ghi.3958.1 /CNT=5 /FEA=EST /TIER=ConsEnd /STK=2 /UG=Ghi.3958 /UG_TITLE=Transcribed locus /REP_ORG=G. hirsutum
Ghi.5233.1.A1_a_at	DT463414	Ghi.5233	4.635	0	gb:DT463414 /DB_XREF=gi:73860675 /DB_XREF=GH_CHX13I09.r /CLONE=GH_CHX13I09 /TID=Ghi.5233.1 /CNT=1 /FEA=EST /TIER=ConsEnd /STK=1 /UG=Ghi.5233 /UG_TITLE=Transcribed locus, moderately similar to NP_565017.1 PFI (PFIFFERLING) (Arabidopsis thaliana) /REP_ORG=G. hirsutum
Ghi.7958.3.S1_at	AI055063	Ghi.18077	4.63465	0	gb:AI055063 /DB_XREF=gi:3326177 /DB_XREF=coau0002O22 /CLONE=coau0002O22 /TID=Ghi.7958.3 /CNT=9 /FEA=EST /TIER=ConsEnd /STK=0 /UG=Ghi.7958 /UG_TITLE=Transcribed locus, moderately similar to NP_171912.2 XIB (Arabidopsis thaliana) /REP_ORG=G. hirsutum
GraAffx.16697.1.S1_at	CO121166	---	4.62868	0	gb:CO121166 /DB_XREF=gi:48819853 /DB_XREF=GR__Eb02D17.f /CLONE=GR__Eb02D17 /TID=GraAffx.16697.1 /CNT=1 /FEA=EST /TIER=ConsEnd /STK=0 /NOTE=sequence(s) not in UniGene /REP_ORG=G. raimondii
GhiAffx.1868.2.A1_at	DW510018.1	Ghi.13526	4.62623	0	gb:DW510018.1 dbest_id:35115801 /TID=GhiAffx.1868.2 /CNT=3 /FEA=EST /TIER=ConsEnd /STK=0 /NOTE=sequence(s) not in UniGene /REP_ORG=
GhiAffx.7507.1.A1_at	DW512437.1	Ghi.21905	4.62021	0	gb:DW512437.1 dbest_id:35118220 /TID=GhiAffx.7507.1 /CNT=2 /FEA=EST /TIER=ConsEnd /STK=1 /NOTE=sequence(s) not in UniGene /REP_ORG=
Ghi.9228.1.A1_at	DT462097	Ghi.9228	4.61347	0.0627412	gb:DT462097 /DB_XREF=gi:73859358 /DB_XREF=GH_CHX08F07.x /CLONE=GH_CHX08F07 /TID=Ghi.9228.1 /CNT=4 /FEA=EST /TIER=ConsEnd /STK=0 /UG=Ghi.9228 /UG_TITLE=Transcribed locus, weakly similar to NP_174654.1 ATPP2-A4 (Arabidopsis thaliana) /REP_ORG=G. hirsutum
Ghi.1054.1.S1_at	DN826761	Ghi.18343	4.60943	0.333638	gb:DN826761 /DB_XREF=gi:84157714 /DB_XREF=G.hir-20, 30 hrs post inoculation 71 /TID=Ghi.1054.1 /CNT=4 /FEA=EST /TIER=ConsEnd /STK=0 /UG=Ghi.1054 /UG_TITLE=Transcribed locus, weakly similar to NP_200316.1 carboxylic ester hydrolase hydrolase, acting on ester bonds lipase (Arabidopsis thaliana) /REP_ORG=G. hirsutum
Ghi.598.1.S1_x_at	DR462734	Ghi.598	4.60418	0	gb:DR462734 /DB_XREF=gi:84174086 /DB_XREF=CM111A08 /TID=Ghi.598.1 /CNT=1 /FEA=EST /TIER=ConsEnd /STK=0 /UG=Ghi.598 /UG_TITLE=Transcribed locus /REP_ORG=G. hirsutum
GhiAffx.7298.1.S1_at	DW510324.1	---	4.60295	0	gb:DW510324.1 dbest_id:35116107 /TID=GhiAffx.7298.1 /CNT=2 /FEA=EST /TIER=ConsEnd /STK=1 /NOTE=sequence(s) not in UniGene /REP_ORG=
Ghi.3626.1.A1_at	DT463564	Ghi.3626	4.59911	0	gb:DT463564 /DB_XREF=gi:73860825 /DB_XREF=GH_CHX13L22.r /CLONE=GH_CHX13L22 /TID=Ghi.3626.1 /CNT=1 /FEA=EST /TIER=ConsEnd /STK=1 /UG=Ghi.3626 /UG_TITLE=Transcribed locus /REP_ORG=G. hirsutum
GhiAffx.7807.1.S1_s_at	DW231871.1	Ghi.13395	4.59618	0	gb:DW231871.1 dbest_id:34836037 /TID=GhiAffx.7807.1 /CNT=4 /FEA=EST /TIER=ConsEnd /STK=0 /NOTE=sequence(s) not in UniGene /REP_ORG=
Ghi.29.1.S1_at	DR463516	Ghi.29	4.59581	0	gb:DR463516 /DB_XREF=gi:84174868 /DB_XREF=CM119C07 /TID=Ghi.29.1 /CNT=1 /FEA=EST /TIER=ConsEnd /STK=0 /UG=Ghi.29 /UG_TITLE=Transcribed locus, weakly similar to NP_974373.1 unknown protein (Arabidopsis thaliana) /REP_ORG=G. hirsutum
Ghi.1182.1.S1_s_at	AY083173.1	Ghi.16588	4.58833	0	gb:AY083173.1 /DB_XREF=gi:19743773 /GEN=MADS-3 /TID=Ghi.1182.1 /CNT=4 /FEA=FLmRNA /TIER=FL /STK=1 /UG=Ghi.1182 /DEF=Gossypium hirsutum AG-like protein (MADS-3) mRNA, complete cds. /PROD=AG-like protein /FL=gb:AY083173.1 /REP_ORG=G. hirsutum
Ghi.157.2.S1_at	DR462332	Ghi.157	4.58679	0	gb:DR462332 /DB_XREF=gi:84173684 /DB_XREF=CM106G12 /TID=Ghi.157.2 /CNT=2 /FEA=EST /TIER=ConsEnd /STK=0 /UG=Ghi.157 /UG_TITLE=Transcribed locus /REP_ORG=G. hirsutum
Ghi.8743.1.A1_at	DT052634	Ghi.8743	4.58202	0	gb:DT052634 /DB_XREF=gi:72280717 /DB_XREF=COT_FE_G10 /TID=Ghi.8743.1 /CNT=4 /FEA=EST /TIER=ConsEnd /STK=4 /UG=Ghi.8743 /UG_TITLE=Transcribed locus /REP_ORG=G. hirsutum
GraAffx.8143.1.A1_at	CO092324	---	4.58167	0	gb:CO092324 /DB_XREF=gi:48791010 /DB_XREF=GR__Ea13E14.r /CLONE=GR__Ea13E14 /TID=GraAffx.8143.1 /CNT=2 /FEA=EST /TIER=ConsEnd /STK=1 /NOTE=sequence(s) not in UniGene /REP_ORG=G. raimondii
Ghi.9163.2.S1_at	DT464308	Ghi.9163	4.57043	0	gb:DT464308 /DB_XREF=gi:73861569 /DB_XREF=GH_CHX15G17.f /CLONE=GH_CHX15G17 /TID=Ghi.9163.2 /CNT=3 /FEA=EST /TIER=ConsEnd /STK=0 /UG=Ghi.9163 /UG_TITLE=Transcribed locus, moderately similar to NP_567533.1 CBL1 (CALCINEURIN B-LIKE PROTEIN 1); calcium ion binding (Arabidopsis thaliana) /REP_ORG=G. hirsutum
Ghi.2979.2.S1_at	DT048475	Ghi.17577	4.56323	0	gb:DT048475 /DB_XREF=gi:72272068 /DB_XREF=COT_DB_A03 /TID=Ghi.2979.2 /CNT=5 /FEA=EST /TIER=ConsEnd /STK=1 /UG=Ghi.2979 /UG_TITLE=Transcribed locus, moderately similar to NP_179802.2 protein binding ubiquitin-protein ligase zinc ion binding (Arabidopsis thaliana) /REP_ORG=G. hirsutum
Ghi.348.1.S1_at	DR460564	Ghi.348	4.56278	0	gb:DR460564 /DB_XREF=gi:84171916 /DB_XREF=CM088B10 /TID=Ghi.348.1 /CNT=1 /FEA=EST /TIER=ConsEnd /STK=0 /UG=Ghi.348 /UG_TITLE=Transcribed locus /REP_ORG=G. hirsutum
Ghi.4017.1.A1_at	DT458820	Ghi.4017	4.56192	0	gb:DT458820 /DB_XREF=gi:73849800 /DB_XREF=GH_ON36L12.r /CLONE=GH_ON36L12 /TID=Ghi.4017.1 /CNT=2 /FEA=EST /TIER=ConsEnd /STK=1 /UG=Ghi.4017 /UG_TITLE=Transcribed locus /REP_ORG=G. hirsutum
Ghi.3008.1.S1_at	DT467062	Ghi.3008	4.5567	0	gb:DT467062 /DB_XREF=gi:73864323 /DB_XREF=GH_CHX19N05.r /CLONE=GH_CHX19N05 /TID=Ghi.3008.1 /CNT=2 /FEA=EST /TIER=ConsEnd /STK=1 /UG=Ghi.3008 /UG_TITLE=Transcribed locus, weakly similar to NP_194338.1 ABI1 (ABA INSENSITIVE 1); calcium ion binding protein phosphatase type 2C (Arabidopsis thaliana) /REP_ORG=G. hirsutum
GhiAffx.44038.1.S1_at	DW516609.1	Ghi.11240	4.55497	0	gb:DW516609.1 dbest_id:35122392 /TID=GhiAffx.44038.1 /CNT=3 /FEA=EST /TIER=ConsEnd /STK=1 /NOTE=sequence(s) not in UniGene /REP_ORG=
Ghi.4285.1.S1_x_at	DT455868	Ghi.2415	4.55164	0.00854976	gb:DT455868 /DB_XREF=gi:73846848 /DB_XREF=GH_ON04F11.f /CLONE=GH_ON04F11 /TID=Ghi.4285.1 /CNT=1 /FEA=EST /TIER=ConsEnd /STK=0 /UG=Ghi.4285 /UG_TITLE=Transcribed locus /REP_ORG=G. hirsutum
Ghi.179.1.S1_at	DR462025	Ghi.179	4.5476	0	gb:DR462025 /DB_XREF=gi:84173377 /DB_XREF=CM103F05 /TID=Ghi.179.1 /CNT=1 /FEA=EST /TIER=ConsEnd /STK=0 /UG=Ghi.179 /UG_TITLE=Transcribed locus /REP_ORG=G. hirsutum
Ghi.9015.1.S1_s_at	DV849320	Ghi.9015	4.54714	0	gb:DV849320 /DB_XREF=gi:82755758 /DB_XREF=GH_LSL09F10.f /CLONE=GH_LSL09F10 /TID=Ghi.9015.1 /CNT=3 /FEA=EST /TIER=ConsEnd /STK=0 /UG=Ghi.9015 /UG_TITLE=Transcribed locus /REP_ORG=G. hirsutum
Gra.108.2.A1_x_at	CO123963	Gra.108	4.53838	0	gb:CO123963 /DB_XREF=gi:48822650 /DB_XREF=GR__Eb06I10.r /CLONE=GR__Eb06I10 /TID=Gra.108.2 /CNT=2 /FEA=EST /TIER=ConsEnd /STK=0 /UG=Gra.108 /UG_TITLE=Transcribed locus, weakly similar to NP_177671.1 wound-responsive protein-related (Arabidopsis thaliana) /REP_ORG=G. raimondii
Ghi.4810.1.A1_at	DT052287	Ghi.4810	4.5383	0	gb:DT052287 /DB_XREF=gi:72279944 /DB_XREF=COT_FA_C06 /TID=Ghi.4810.1 /CNT=14 /FEA=EST /TIER=Stack /STK=12 /UG=Ghi.4810 /UG_TITLE=Transcribed locus, moderately similar to NP_201025.1 PRH75; ATP-dependent helicase (Arabidopsis thaliana) /REP_ORG=G. hirsutum
Ghi.6348.1.A1_x_at	CO491721	Ghi.6348	4.5344	0	gb:CO491721 /DB_XREF=gi:54116212 /DB_XREF=G.h.fbr-sw01111 /TID=Ghi.6348.1 /CNT=1 /FEA=EST /TIER=ConsEnd /STK=0 /UG=Ghi.6348 /UG_TITLE=Transcribed locus /REP_ORG=G. hirsutum
GhiAffx.26171.1.A1_at	DW520402.1	Ghi.16866	4.53384	0	gb:DW520402.1 dbest_id:35126185 /TID=GhiAffx.26171.1 /CNT=2 /FEA=EST /TIER=ConsEnd /STK=1 /NOTE=sequence(s) not in UniGene /REP_ORG=
Ghi.4301.1.S1_s_at	DT455687	Ghi.4301	4.53047	0	gb:DT455687 /DB_XREF=gi:73846667 /DB_XREF=GH_ON02C04.f /CLONE=GH_ON02C04 /TID=Ghi.4301.1 /CNT=1 /FEA=EST /TIER=ConsEnd /STK=0 /UG=Ghi.4301 /UG_TITLE=Transcribed locus, weakly similar to NP_194111.1 transcription factor (Arabidopsis thaliana) /REP_ORG=G. hirsutum
Ghi.3215.1.S1_s_at	AY619718.1	Ghi.16274	4.52759	0	gb:AY619718.1 /DB_XREF=gi:47934118 /GEN=DBP2 /TID=Ghi.3215.1 /CNT=7 /FEA=FLmRNA /TIER=FL /STK=1 /UG=Ghi.3215 /DEF=Gossypium hirsutum transcription factor DRE-binding factor 2 (DBP2) mRNA, complete cds. /PROD=transcription factor DRE-binding factor 2 /FL=gb:AY619718.1 /REP_ORG=G. hirsutum
Ghi.7976.1.S1_at	AI054914	Ghi.7976	4.52222	0	gb:AI054914 /DB_XREF=gi:3326028 /DB_XREF=coau0002I04 /CLONE=coau0002I04 /TID=Ghi.7976.1 /CNT=1 /FEA=EST /TIER=ConsEnd /STK=0 /UG=Ghi.7976 /UG_TITLE=Transcribed locus, weakly similar to NP_181466.2 unknown protein (Arabidopsis thaliana) /REP_ORG=G. hirsutum
Ghi.154.1.S1_s_at	DR462270	Ghi.154	4.51959	0	gb:DR462270 /DB_XREF=gi:84173622 /DB_XREF=CM106B10 /TID=Ghi.154.1 /CNT=1 /FEA=EST /TIER=ConsEnd /STK=0 /UG=Ghi.154 /UG_TITLE=Transcribed locus, weakly similar to NP_200829.2 unknown protein (Arabidopsis thaliana) /REP_ORG=G. hirsutum
Gra.1239.1.S1_at	CO132701	Gra.1239	4.51312	0	gb:CO132701 /DB_XREF=gi:48881679 /DB_XREF=GR__Eb45L08.r /CLONE=GR__Eb45L08 /TID=Gra.1239.1 /CNT=3 /FEA=EST /TIER=ConsEnd /STK=1 /UG=Gra.1239 /UG_TITLE=Transcribed locus, moderately similar to NP_181466.2 SAC3GANP family protein (Arabidopsis thaliana) /REP_ORG=G. raimondii
Ghi.6522.1.S1_at	CD486134	Ghi.6522	4.50883	0	gb:CD486134 /DB_XREF=gi:31407099 /DB_XREF=CFUS6.3B02 /CLONE=CFUS6.3B02 /TID=Ghi.6522.1 /CNT=4 /FEA=EST /TIER=ConsEnd /STK=0 /UG=Ghi.6522 /UG_TITLE=Transcribed locus, weakly similar to NP_186796.1 ATHB-1; transcription factor (Arabidopsis thaliana) /REP_ORG=G. hirsutum
Ghi.299.1.S1_s_at	DR461070	Ghi.299	4.50519	0	gb:DR461070 /DB_XREF=gi:84172422 /DB_XREF=CM093E06 /TID=Ghi.299.1 /CNT=1 /FEA=EST /TIER=ConsEnd /STK=0 /UG=Ghi.299 /UG_TITLE=Transcribed locus /REP_ORG=G. hirsutum
Ghi.7319.2.S1_at	DT046472	Ghi.17503	4.50271	0	gb:DT046472 /DB_XREF=gi:72267852 /DB_XREF=COT_AB_C06 /TID=Ghi.7319.2 /CNT=2 /FEA=EST /TIER=ConsEnd /STK=1 /UG=Ghi.7319 /UG_TITLE=Transcribed locus, weakly similar to XP_483309.1 putative aminoacylase (Oryza sativa (japonica cultivar-group)) /REP_ORG=G. hirsutum
Ghi.3873.1.A1_at	DT460930	Ghi.3873	4.50111	0	gb:DT460930 /DB_XREF=gi:73851910 /DB_XREF=GH_ON40B11.r /CLONE=GH_ON40B11 /TID=Ghi.3873.1 /CNT=4 /FEA=EST /TIER=ConsEnd /STK=1 /UG=Ghi.3873 /UG_TITLE=Transcribed locus /REP_ORG=G. hirsutum
Ghi.4252.1.S1_x_at	DT456520	Ghi.4252	4.49873	0	gb:DT456520 /DB_XREF=gi:73847500 /DB_XREF=GH_ON16H01.f /CLONE=GH_ON16H01 /TID=Ghi.4252.1 /CNT=1 /FEA=EST /TIER=ConsEnd /STK=0 /UG=Ghi.4252 /UG_TITLE=Transcribed locus /REP_ORG=G. hirsutum
Ghi.5190.1.S1_s_at	DT048690	Ghi.5190	4.49587	0	gb:DT048690 /DB_XREF=gi:72272516 /DB_XREF=COT_DD_E10 /TID=Ghi.5190.1 /CNT=5 /FEA=EST /TIER=ConsEnd /STK=1 /UG=Ghi.5190 /UG_TITLE=Transcribed locus, moderately similar to NP_175113.2 protein binding (Arabidopsis thaliana) /REP_ORG=G. hirsutum
Ghi.8845.1.A1_s_at	DT456859	Ghi.8845	4.49469	0	gb:DT456859 /DB_XREF=gi:73847839 /DB_XREF=GH_ON33J05.r /CLONE=GH_ON33J05 /TID=Ghi.8845.1 /CNT=3 /FEA=EST /TIER=ConsEnd /STK=1 /UG=Ghi.8845 /UG_TITLE=Transcribed locus, weakly similar to NP_196080.1 RNA binding nucleic acid binding (Arabidopsis thaliana) /REP_ORG=G. hirsutum
Ghi.4240.1.S1_at	DT456081	Ghi.4240	4.49117	0	gb:DT456081 /DB_XREF=gi:73847061 /DB_XREF=GH_ON11E03.f /CLONE=GH_ON11E03 /TID=Ghi.4240.1 /CNT=2 /FEA=EST /TIER=ConsEnd /STK=0 /UG=Ghi.4240 /UG_TITLE=Transcribed locus /REP_ORG=G. hirsutum
GhiAffx.45058.1.A1_s_at	DW239984.1	---	4.49061	0	gb:DW239984.1 dbest_id:34844150 /TID=GhiAffx.45058.1 /CNT=1 /FEA=EST /TIER=ConsEnd /STK=1 /NOTE=sequence(s) not in UniGene /REP_ORG=
GhiAffx.24389.1.S1_at	DW510921.1	Ghi.19831	4.47731	0	gb:DW510921.1 dbest_id:35116704 /TID=GhiAffx.24389.1 /CNT=2 /FEA=EST /TIER=ConsEnd /STK=1 /NOTE=sequence(s) not in UniGene /REP_ORG=
Ghi.4193.1.S1_at	DT456257	Ghi.4193	4.47699	0	gb:DT456257 /DB_XREF=gi:73847237 /DB_XREF=GH_ON13E11.f /CLONE=GH_ON13E11 /TID=Ghi.4193.1 /CNT=3 /FEA=EST /TIER=ConsEnd /STK=0 /UG=Ghi.4193 /UG_TITLE=Transcribed locus /REP_ORG=G. hirsutum
GhiAffx.1589.43.S1_x_at	DW232992.1	Ghi.17986	4.47672	0	gb:DW232992.1 dbest_id:34837158 /TID=GhiAffx.1589.43 /CNT=3 /FEA=EST /TIER=ConsEnd /STK=0 /NOTE=sequence(s) not in UniGene /REP_ORG=
Ghi.3502.1.A1_at	DT464589	Ghi.3502	4.4739	0	gb:DT464589 /DB_XREF=gi:73861850 /DB_XREF=GH_CHX15O20.r /CLONE=GH_CHX15O20 /TID=Ghi.3502.1 /CNT=5 /FEA=EST /TIER=ConsEnd /STK=4 /UG=Ghi.3502 /UG_TITLE=Transcribed locus, weakly similar to NP_175058.1 ATP binding ATPase nucleoside-triphosphatase nucleotide binding (Arabidopsis thaliana) /REP_ORG=G. hirsutum
Gra.1008.2.A1_s_at	CO089149	Gra.1008	4.4718	0	gb:CO089149 /DB_XREF=gi:48779783 /DB_XREF=GR__Ea08I02.r /CLONE=GR__Ea08I02 /TID=Gra.1008.2 /CNT=3 /FEA=EST /TIER=ConsEnd /STK=1 /UG=Gra.1008 /UG_TITLE=Transcribed locus, moderately similar to NP_190281.1 starch phosphorylase, putative (Arabidopsis thaliana) /REP_ORG=G. raimondii
GhiAffx.9171.1.S1_s_at	DW515206.1	Ghi.13865	4.46907	0	gb:DW515206.1 dbest_id:35120989 /TID=GhiAffx.9171.1 /CNT=3 /FEA=EST /TIER=ConsEnd /STK=0 /NOTE=sequence(s) not in UniGene /REP_ORG=
Ghi.9069.1.S1_s_at	DT456387	Ghi.9069	4.4649	0	gb:DT456387 /DB_XREF=gi:73847367 /DB_XREF=GH_ON15C01.f /CLONE=GH_ON15C01 /TID=Ghi.9069.1 /CNT=7 /FEA=EST /TIER=ConsEnd /STK=1 /UG=Ghi.9069 /UG_TITLE=Transcribed locus, moderately similar to NP_189578.1 phosphorylase transferase, transferring glycosyl groups (Arabidopsis thaliana) /REP_ORG=G. hirsutum
Ghi.4598.1.A1_at	DT052085	Ghi.17103	4.45818	0.0292223	gb:DT052085 /DB_XREF=gi:72279542 /DB_XREF=COT_ET_G10 /TID=Ghi.4598.1 /CNT=6 /FEA=EST /TIER=ConsEnd /STK=0 /UG=Ghi.4598 /UG_TITLE=Transcribed locus, strongly similar to XP_479089.1 putative reversibly glycosylated polypeptide (Oryza sativa (japonica cultivar-group)) /REP_ORG=G. hirsutum
GraAffx.33830.2.S1_s_at	CO088891	---	4.45215	0	gb:CO088891 /DB_XREF=gi:48779525 /DB_XREF=GR__Ea08B16.f /CLONE=GR__Ea08B16 /TID=GraAffx.33830.2 /CNT=2 /FEA=EST /TIER=ConsEnd /STK=0 /NOTE=sequence(s) not in UniGene /REP_ORG=G. raimondii
GhiAffx.4169.2.A1_at	DW225967.1	Ghi.12326	4.45145	0	gb:DW225967.1 dbest_id:34830139 /TID=GhiAffx.4169.2 /CNT=2 /FEA=EST /TIER=ConsEnd /STK=0 /NOTE=sequence(s) not in UniGene /REP_ORG=
Gra.1108.2.S1_s_at	CO099195	Gra.1108	4.44951	0	gb:CO099195 /DB_XREF=gi:48797881 /DB_XREF=GR__Ea23O24.f /CLONE=GR__Ea23O24 /TID=Gra.1108.2 /CNT=6 /FEA=EST /TIER=ConsEnd /STK=0 /UG=Gra.1108 /UG_TITLE=Transcribed locus, moderately similar to XP_478512.1 putative thiamine biosynthesis protein (Oryza sativa (japonica cultivar-group)) /REP_ORG=G. raimondii
Ghi.10686.1.A1_at	DT053150	Ghi.10686	4.43924	0	gb:DT053150 /DB_XREF=gi:72281783 /DB_XREF=COT_FL_F07 /TID=Ghi.10686.1 /CNT=1 /FEA=EST /TIER=ConsEnd /STK=1 /UG=Ghi.10686 /UG_TITLE=Transcribed locus, moderately similar to NP_172223.1 catalytic protein phosphatase type 2C (Arabidopsis thaliana) /REP_ORG=G. hirsutum
GhiAffx.63433.1.S1_s_at	DW520083.1	Ghi.13980	4.42758	0	gb:DW520083.1 dbest_id:35125866 /TID=GhiAffx.63433.1 /CNT=4 /FEA=EST /TIER=ConsEnd /STK=1 /NOTE=sequence(s) not in UniGene /REP_ORG=
GraAffx.16008.1.S1_s_at	CO123129	---	4.42485	0	gb:CO123129 /DB_XREF=gi:48821816 /DB_XREF=GR__Eb05B22.r /CLONE=GR__Eb05B22 /TID=GraAffx.16008.1 /CNT=2 /FEA=EST /TIER=ConsEnd /STK=1 /NOTE=sequence(s) not in UniGene /REP_ORG=G. raimondii
Ghi.6734.1.S1_x_at	CA993424	Ghi.6734	4.41911	0	gb:CA993424 /DB_XREF=gi:31073145 /DB_XREF=pAR07E10 /TID=Ghi.6734.1 /CNT=2 /FEA=EST /TIER=ConsEnd /STK=0 /UG=Ghi.6734 /UG_TITLE=Transcribed locus /REP_ORG=G. hirsutum
GhiAffx.6855.1.A1_at	DW505413.1	---	4.41394	0	gb:DW505413.1 dbest_id:35111196 /TID=GhiAffx.6855.1 /CNT=2 /FEA=EST /TIER=ConsEnd /STK=1 /NOTE=sequence(s) not in UniGene /REP_ORG=
Gra.108.2.S1_s_at	CO096459	Gra.108	4.37654	0	gb:CO096459 /DB_XREF=gi:48795145 /DB_XREF=GR__Ea19L17.f /CLONE=GR__Ea19L17 /TID=Gra.108.2 /CNT=2 /FEA=EST /TIER=ConsEnd /STK=0 /UG=Gra.108 /UG_TITLE=Transcribed locus, weakly similar to NP_177671.1 wound-responsive protein-related (Arabidopsis thaliana) /REP_ORG=G. raimondii
GhiAffx.51048.1.A1_s_at	DR455003	Ghi.10286	4.37496	0	gb:DR455003 /DB_XREF=gi:84166355 /DB_XREF=CM029F11 /TID=GhiAffx.51048.1 /CNT=4 /FEA=EST /TIER=ConsEnd /STK=0 /NOTE=sequence(s) not in UniGene /REP_ORG=G. hirsutum
GhiAffx.25700.1.A1_at	DW517728.1	---	4.37474	0	gb:DW517728.1 dbest_id:35123511 /TID=GhiAffx.25700.1 /CNT=2 /FEA=EST /TIER=ConsEnd /STK=1 /NOTE=sequence(s) not in UniGene /REP_ORG=
Ghi.3913.1.A1_x_at	DT460360	Ghi.3913	4.37274	0	gb:DT460360 /DB_XREF=gi:73851340 /DB_XREF=GH_ON39C21.r /CLONE=GH_ON39C21 /TID=Ghi.3913.1 /CNT=3 /FEA=EST /TIER=ConsEnd /STK=1 /UG=Ghi.3913 /UG_TITLE=Transcribed locus, weakly similar to NP_177931.1 RAP2.4; DNA binding transcription factor (Arabidopsis thaliana) /REP_ORG=G. hirsutum
GhiAffx.15571.1.S1_a_at	DW505599.1	---	4.37267	0	gb:DW505599.1 dbest_id:35111382 /TID=GhiAffx.15571.1 /CNT=2 /FEA=EST /TIER=ConsEnd /STK=0 /NOTE=sequence(s) not in UniGene /REP_ORG=
Ghi.9271.5.A1_at	DT463804	Ghi.9271	4.3685	0	gb:DT463804 /DB_XREF=gi:73861065 /DB_XREF=GH_CHX14D01.r /CLONE=GH_CHX14D01 /TID=Ghi.9271.5 /CNT=3 /FEA=EST /TIER=ConsEnd /STK=2 /UG=Ghi.9271 /UG_TITLE=Transcribed locus, moderately similar to NP_176960.1 unknown protein (Arabidopsis thaliana) /REP_ORG=G. hirsutum
Ghi.3211.1.A1_at	DT466097	Ghi.3211	4.36166	0.00854976	gb:DT466097 /DB_XREF=gi:73863358 /DB_XREF=GH_CHX18G06.r /CLONE=GH_CHX18G06 /TID=Ghi.3211.1 /CNT=3 /FEA=EST /TIER=ConsEnd /STK=1 /UG=Ghi.3211 /UG_TITLE=Transcribed locus, weakly similar to XP_450940.1 putative glutathione S-transferase (Oryza sativa (japonica cultivar-group)) /REP_ORG=G. hirsutum
Ghi.4795.1.A1_s_at	DT050576	Ghi.4795	4.36145	0	gb:DT050576 /DB_XREF=gi:72276320 /DB_XREF=COT_EB_C05 /TID=Ghi.4795.1 /CNT=1 /FEA=EST /TIER=ConsEnd /STK=1 /UG=Ghi.4795 /UG_TITLE=Transcribed locus, weakly similar to NP_174134.1 GH3.17 (Arabidopsis thaliana) /REP_ORG=G. hirsutum
Ghi.3432.1.A1_at	DT460686	Ghi.3432	4.35769	0	gb:DT460686 /DB_XREF=gi:73851666 /DB_XREF=GH_ON39K24.r /CLONE=GH_ON39K24 /TID=Ghi.3432.1 /CNT=3 /FEA=EST /TIER=ConsEnd /STK=1 /UG=Ghi.3432 /UG_TITLE=Transcribed locus /REP_ORG=G. hirsutum
Ghi.4088.1.A1_x_at	DR463608	Ghi.4088	4.35547	0	gb:DR463608 /DB_XREF=gi:84174960 /DB_XREF=CM120C04 /TID=Ghi.4088.1 /CNT=2 /FEA=EST /TIER=ConsEnd /STK=0 /UG=Ghi.4088 /UG_TITLE=Transcribed locus, moderately similar to NP_564369.1 transcription factor (Arabidopsis thaliana) /REP_ORG=G. hirsutum
GhiAffx.6166.1.S1_at	DW495672.1	Ghi.11869	4.35369	0	gb:DW495672.1 dbest_id:35100100 /TID=GhiAffx.6166.1 /CNT=4 /FEA=EST /TIER=ConsEnd /STK=2 /NOTE=sequence(s) not in UniGene /REP_ORG=
Ghi.7389.1.S1_x_at	AI731169	Ghi.7389	4.34769	0	gb:AI731169 /DB_XREF=gi:5050021 /DB_XREF=BNLGHi8577 /TID=Ghi.7389.1 /CNT=7 /FEA=EST /TIER=ConsEnd /STK=0 /UG=Ghi.7389 /UG_TITLE=Transcribed locus, weakly similar to NP_182150.1 GBF3 (G-BOX BINDING FACTOR 3); transcription factor (Arabidopsis thaliana) /REP_ORG=G. hirsutum
Ghi.4651.1.A1_a_at	DT047056	Ghi.19222	4.3437	0	gb:DT047056 /DB_XREF=gi:72269240 /DB_XREF=COT_CJ_E07 /TID=Ghi.4651.1 /CNT=1 /FEA=EST /TIER=ConsEnd /STK=1 /UG=Ghi.4651 /UG_TITLE=Transcribed locus, strongly similar to NP_178157.2 EMB2753 (Arabidopsis thaliana) /REP_ORG=G. hirsutum
GhiAffx.25432.1.A1_s_at	DW228015.1	---	4.34244	0	gb:DW228015.1 dbest_id:34832187 /TID=GhiAffx.25432.1 /CNT=3 /FEA=EST /TIER=ConsEnd /STK=1 /NOTE=sequence(s) not in UniGene /REP_ORG=
Ghi.1372.1.S1_at	DN800855	Ghi.48	4.33877	0	gb:DN800855 /DB_XREF=gi:84151500 /DB_XREF=G.hir-15-20 DAA bolls drought stressed 10 /TID=Ghi.1372.1 /CNT=3 /FEA=EST /TIER=ConsEnd /STK=0 /UG=Ghi.1372 /UG_TITLE=Transcribed locus /REP_ORG=G. hirsutum
Ghi.8845.1.S1_at	DT456229	Ghi.8845	4.3345	0	gb:DT456229 /DB_XREF=gi:73847209 /DB_XREF=GH_ON13C03.f /CLONE=GH_ON13C03 /TID=Ghi.8845.1 /CNT=3 /FEA=EST /TIER=ConsEnd /STK=0 /UG=Ghi.8845 /UG_TITLE=Transcribed locus, weakly similar to NP_196080.1 RNA binding nucleic acid binding (Arabidopsis thaliana) /REP_ORG=G. hirsutum
Ghi.1460.1.S1_at	DN781448	Ghi.1460	4.33448	0	gb:DN781448 /DB_XREF=gi:84150148 /DB_XREF=G.hir-Cotyledon 1976 /TID=Ghi.1460.1 /CNT=1 /FEA=EST /TIER=ConsEnd /STK=0 /UG=Ghi.1460 /UG_TITLE=Transcribed locus, weakly similar to NP_563872.1 unknown protein (Arabidopsis thaliana) /REP_ORG=G. hirsutum
Ghi.572.1.S1_x_at	DR457557	Ghi.572	4.3292	0	gb:DR457557 /DB_XREF=gi:84168909 /DB_XREF=CM056E06 /TID=Ghi.572.1 /CNT=1 /FEA=EST /TIER=ConsEnd /STK=0 /UG=Ghi.572 /UG_TITLE=Transcribed locus /REP_ORG=G. hirsutum
Ghi.6776.1.S1_at	DT468430	Ghi.6776	4.32818	0.0366566	gb:DT468430 /DB_XREF=gi:73865692 /DB_XREF=GH_CHX21N19.r /CLONE=GH_CHX21N19 /TID=Ghi.6776.1 /CNT=2 /FEA=EST /TIER=ConsEnd /STK=1 /UG=Ghi.6776 /UG_TITLE=Transcribed locus, weakly similar to NP_916412.1 B1070A12.8 (Oryza sativa (japonica cultivar-group)) /REP_ORG=G. hirsutum
Ghi.4916.1.A1_x_at	DT459572	Ghi.4916	4.32638	0	gb:DT459572 /DB_XREF=gi:73850552 /DB_XREF=GH_ON37N24.r /CLONE=GH_ON37N24 /TID=Ghi.4916.1 /CNT=1 /FEA=EST /TIER=ConsEnd /STK=1 /UG=Ghi.4916 /UG_TITLE=Transcribed locus, weakly similar to XP_479904.1 putative bromodomain-containing protein (Oryza sativa (japonica cultivar-group)) /REP_ORG=G. hirsutum
GhiAffx.3083.3.S1_s_at	DW512822.1	Ghi.13172	4.31153	0	gb:DW512822.1 dbest_id:35118605 /TID=GhiAffx.3083.3 /CNT=3 /FEA=EST /TIER=ConsEnd /STK=1 /NOTE=sequence(s) not in UniGene /REP_ORG=
GraAffx.968.1.S1_at	CO127980	---	4.30981	0	gb:CO127980 /DB_XREF=gi:48829590 /DB_XREF=GR__Eb12N06.r /CLONE=GR__Eb12N06 /TID=GraAffx.968.1 /CNT=2 /FEA=EST /TIER=ConsEnd /STK=1 /NOTE=sequence(s) not in UniGene /REP_ORG=G. raimondii
GhiAffx.50377.2.S1_at	DW517649.1	---	4.29543	0	gb:DW517649.1 dbest_id:35123432 /TID=GhiAffx.50377.2 /CNT=2 /FEA=EST /TIER=ConsEnd /STK=0 /NOTE=sequence(s) not in UniGene /REP_ORG=
Ghi.9253.2.A1_a_at	DT466833	Ghi.9253	4.29533	0.00854976	gb:DT466833 /DB_XREF=gi:73864094 /DB_XREF=GH_CHX19H20.r /CLONE=GH_CHX19H20 /TID=Ghi.9253.2 /CNT=9 /FEA=EST /TIER=ConsEnd /STK=4 /UG=Ghi.9253 /UG_TITLE=Transcribed locus, moderately similar to NP_177743.1 SKS5; copper ion binding (Arabidopsis thaliana) /REP_ORG=G. hirsutum
Ghi.3737.1.A1_at	DT462163	Ghi.3737	4.2932	0	gb:DT462163 /DB_XREF=gi:73859424 /DB_XREF=GH_CHX09E01.x /CLONE=GH_CHX09E01 /TID=Ghi.3737.1 /CNT=1 /FEA=EST /TIER=ConsEnd /STK=0 /UG=Ghi.3737 /UG_TITLE=Transcribed locus /REP_ORG=G. hirsutum
Ghi.5088.1.A1_s_at	DT467181	Ghi.10135	4.288	0	gb:DT467181 /DB_XREF=gi:73864442 /DB_XREF=GH_CHX19P23.f /CLONE=GH_CHX19P23 /TID=Ghi.5088.1 /CNT=4 /FEA=EST /TIER=ConsEnd /STK=1 /UG=Ghi.5088 /UG_TITLE=Transcribed locus, moderately similar to NP_001031938.1 KNAT3 (KNOTTED1-LIKE HOMEOBOX GENE 3) (Arabidopsis thaliana) /REP_ORG=G. hirsutum
Ghi.6327.2.S1_at	DT463316	Ghi.6327	4.28642	0	gb:DT463316 /DB_XREF=gi:73860577 /DB_XREF=GH_CHX13G03.r /CLONE=GH_CHX13G03 /TID=Ghi.6327.2 /CNT=2 /FEA=EST /TIER=ConsEnd /STK=0 /UG=Ghi.6327 /UG_TITLE=Transcribed locus, weakly similar to NP_178407.2 unknown protein (Arabidopsis thaliana) /REP_ORG=G. hirsutum
GhiAffx.15164.1.A1_s_at	DW505592.1	Ghi.1100	4.28499	0	gb:DW505592.1 dbest_id:35111375 /TID=GhiAffx.15164.1 /CNT=4 /FEA=EST /TIER=ConsEnd /STK=1 /NOTE=sequence(s) not in UniGene /REP_ORG=
Ghi.4975.1.S1_x_at	DT048279	Ghi.4975	4.28449	0	gb:DT048279 /DB_XREF=gi:72271678 /DB_XREF=COT_CY_F10 /TID=Ghi.4975.1 /CNT=5 /FEA=EST /TIER=ConsEnd /STK=1 /UG=Ghi.4975 /UG_TITLE=Transcribed locus, strongly similar to NP_177894.1 unknown protein (Arabidopsis thaliana) /REP_ORG=G. hirsutum
Ghi.9208.1.S1_at	DT466677	Ghi.9208	4.2838	0	gb:DT466677 /DB_XREF=gi:73863938 /DB_XREF=GH_CHX19D17.r /CLONE=GH_CHX19D17 /TID=Ghi.9208.1 /CNT=3 /FEA=EST /TIER=ConsEnd /STK=1 /UG=Ghi.9208 /UG_TITLE=Transcribed locus, weakly similar to NP_200971.1 unknown protein (Arabidopsis thaliana) /REP_ORG=G. hirsutum
Ghi.3793.1.A1_at	DT461658	Ghi.3793	4.28219	0	gb:DT461658 /DB_XREF=gi:73858919 /DB_XREF=GH_CHX02H12.x /CLONE=GH_CHX02H12 /TID=Ghi.3793.1 /CNT=1 /FEA=EST /TIER=ConsEnd /STK=0 /UG=Ghi.3793 /UG_TITLE=Transcribed locus, weakly similar to NP_199549.2 unknown protein (Arabidopsis thaliana) /REP_ORG=G. hirsutum
GraAffx.11906.4.A1_a_at	CO088232	---	4.28013	0	gb:CO088232 /DB_XREF=gi:48778866 /DB_XREF=GR__Ea07B14.r /CLONE=GR__Ea07B14 /TID=GraAffx.11906.4 /CNT=1 /FEA=EST /TIER=ConsEnd /STK=1 /NOTE=sequence(s) not in UniGene /REP_ORG=G. raimondii
Ghi.3342.1.S1_at	DT467115	Ghi.3342	4.27606	0	gb:DT467115 /DB_XREF=gi:73864376 /DB_XREF=GH_CHX19O11.f /CLONE=GH_CHX19O11 /TID=Ghi.3342.1 /CNT=2 /FEA=EST /TIER=ConsEnd /STK=0 /UG=Ghi.3342 /UG_TITLE=Transcribed locus, weakly similar to NP_850278.1 protein binding ubiquitin-protein ligase zinc ion binding (Arabidopsis thaliana) /REP_ORG=G. hirsutum
GraAffx.8284.1.S1_s_at	CO091525	---	4.27094	0	gb:CO091525 /DB_XREF=gi:48790211 /DB_XREF=GR__Ea12A21.r /CLONE=GR__Ea12A21 /TID=GraAffx.8284.1 /CNT=2 /FEA=EST /TIER=ConsEnd /STK=1 /NOTE=sequence(s) not in UniGene /REP_ORG=G. raimondii
GhiAffx.1788.1.S1_at	AJ513173	Ghi.14448	4.26965	0	gb:AJ513173 /DB_XREF=gi:24976655 /DB_XREF=AJ513173 /CLONE=su187b11r3 /TID=GhiAffx.1788.1 /CNT=7 /FEA=EST /TIER=ConsEnd /STK=0 /NOTE=sequence(s) not in UniGene /REP_ORG=G. hirsutum
Ghi.7325.3.A1_s_at	DT460439	Ghi.7325	4.26962	0	gb:DT460439 /DB_XREF=gi:73851419 /DB_XREF=GH_ON39E23.r /CLONE=GH_ON39E23 /TID=Ghi.7325.3 /CNT=5 /FEA=EST /TIER=ConsEnd /STK=0 /UG=Ghi.7325 /UG_TITLE=Transcribed locus, moderately similar to NP_193448.2 catalytic (Arabidopsis thaliana) /REP_ORG=G. hirsutum
Ghi.912.3.A1_at	DT468062	Ghi.912	4.25737	0	gb:DT468062 /DB_XREF=gi:73865324 /DB_XREF=GH_CHX21F10.r /CLONE=GH_CHX21F10 /TID=Ghi.912.3 /CNT=4 /FEA=EST /TIER=ConsEnd /STK=1 /UG=Ghi.912 /UG_TITLE=Transcribed locus, weakly similar to XP_463083.1 putative polyprotein (Oryza sativa (japonica cultivar-group)) /REP_ORG=G. hirsutum
Ghi.3962.1.S1_at	DN802589	Ghi.3962	4.2567	0	gb:DN802589 /DB_XREF=gi:84153234 /DB_XREF=G.hir-15-20 DAA bolls irrigated 792 /TID=Ghi.3962.1 /CNT=4 /FEA=EST /TIER=ConsEnd /STK=0 /UG=Ghi.3962 /UG_TITLE=Transcribed locus, moderately similar to NP_200205.1 unknown protein (Arabidopsis thaliana) /REP_ORG=G. hirsutum
GhiAffx.34527.1.A1_at	DW227360.1	---	4.25241	0	gb:DW227360.1 dbest_id:34831532 /TID=GhiAffx.34527.1 /CNT=2 /FEA=EST /TIER=ConsEnd /STK=1 /NOTE=sequence(s) not in UniGene /REP_ORG=
Gra.1064.4.A1_at	CO127347	Gra.1064	4.25	0	gb:CO127347 /DB_XREF=gi:48828957 /DB_XREF=GR__Eb11N20.r /CLONE=GR__Eb11N20 /TID=Gra.1064.4 /CNT=2 /FEA=EST /TIER=ConsEnd /STK=1 /UG=Gra.1064 /UG_TITLE=Transcribed locus, strongly similar to NP_193170.1 casein kinase I (CKI1) (Arabidopsis thaliana) /REP_ORG=G. raimondii
Ghi.4247.1.A1_at	DT456552	Ghi.4247	4.24137	0	gb:DT456552 /DB_XREF=gi:73847532 /DB_XREF=GH_ON33A12.r /CLONE=GH_ON33A12 /TID=Ghi.4247.1 /CNT=3 /FEA=EST /TIER=ConsEnd /STK=1 /UG=Ghi.4247 /UG_TITLE=Transcribed locus /REP_ORG=G. hirsutum
GhiAffx.42302.1.S1_at	DW238149.1	Ghi.12654	4.23323	0	gb:DW238149.1 dbest_id:34842315 /TID=GhiAffx.42302.1 /CNT=4 /FEA=EST /TIER=ConsEnd /STK=0 /NOTE=sequence(s) not in UniGene /REP_ORG=
Ghi.8809.2.S1_at	DT456200	Ghi.8809	4.22196	0	gb:DT456200 /DB_XREF=gi:73847180 /DB_XREF=GH_ON12H03.f /CLONE=GH_ON12H03 /TID=Ghi.8809.2 /CNT=2 /FEA=EST /TIER=ConsEnd /STK=0 /UG=Ghi.8809 /UG_TITLE=Transcribed locus, moderately similar to NP_568580.1 catalytic (Arabidopsis thaliana) /REP_ORG=G. hirsutum
Ghi.3662.1.S1_at	DT463052	Ghi.3662	4.22088	0	gb:DT463052 /DB_XREF=gi:73860313 /DB_XREF=GH_CHX12P21.r /CLONE=GH_CHX12P21 /TID=Ghi.3662.1 /CNT=4 /FEA=EST /TIER=ConsEnd /STK=1 /UG=Ghi.3662 /UG_TITLE=Transcribed locus, weakly similar to NP_564814.1 transcription factor (Arabidopsis thaliana) /REP_ORG=G. hirsutum
Ghi.135.1.S1_at	DR462568	Ghi.135	4.20901	0	gb:DR462568 /DB_XREF=gi:84173920 /DB_XREF=CM109C10 /TID=Ghi.135.1 /CNT=1 /FEA=EST /TIER=ConsEnd /STK=0 /UG=Ghi.135 /UG_TITLE=Transcribed locus, weakly similar to XP_464221.1 putative auxin response transcription factor(ARF6) (Oryza sativa (japonica cultivar-group)) /REP_ORG=G. hirsutum
Gra.1508.1.A1_s_at	CO126262	Gra.1508	4.20872	0	gb:CO126262 /DB_XREF=gi:48827872 /DB_XREF=GR__Eb10D02.r /CLONE=GR__Eb10D02 /TID=Gra.1508.1 /CNT=1 /FEA=EST /TIER=ConsEnd /STK=1 /UG=Gra.1508 /UG_TITLE=Transcribed locus /REP_ORG=G. raimondii
Ghi.133.1.S1_s_at	DR462578	Ghi.133	4.20857	0	gb:DR462578 /DB_XREF=gi:84173930 /DB_XREF=CM109D08 /TID=Ghi.133.1 /CNT=1 /FEA=EST /TIER=ConsEnd /STK=1 /UG=Ghi.133 /UG_TITLE=Transcribed locus /REP_ORG=G. hirsutum
GhiAffx.12729.1.A1_at	DT466204	Ghi.13561	4.20625	0	gb:DT466204 /DB_XREF=gi:73863465 /DB_XREF=GH_CHX18I19.r /CLONE=GH_CHX18I19 /TID=GhiAffx.12729.1 /CNT=2 /FEA=EST /TIER=ConsEnd /STK=1 /NOTE=sequence(s) not in UniGene /REP_ORG=G. hirsutum
Ghi.3320.2.S1_at	DT467326	Ghi.3320	4.20137	0	gb:DT467326 /DB_XREF=gi:73864587 /DB_XREF=GH_CHX20D19.r /CLONE=GH_CHX20D19 /TID=Ghi.3320.2 /CNT=4 /FEA=EST /TIER=ConsEnd /STK=0 /UG=Ghi.3320 /UG_TITLE=Transcribed locus, moderately similar to NP_172544.1 unknown protein (Arabidopsis thaliana) /REP_ORG=G. hirsutum
Ghi.3418.1.A1_at	DT466071	Ghi.3418	4.19771	0	gb:DT466071 /DB_XREF=gi:73863332 /DB_XREF=GH_CHX18F17.r /CLONE=GH_CHX18F17 /TID=Ghi.3418.1 /CNT=1 /FEA=EST /TIER=ConsEnd /STK=1 /UG=Ghi.3418 /UG_TITLE=Transcribed locus, weakly similar to NP_850086.1 unknown protein (Arabidopsis thaliana) /REP_ORG=G. hirsutum
Ghi.3648.1.A1_at	DT463235	Ghi.3648	4.19739	0	gb:DT463235 /DB_XREF=gi:73860496 /DB_XREF=GH_CHX13E08.r /CLONE=GH_CHX13E08 /TID=Ghi.3648.1 /CNT=2 /FEA=EST /TIER=ConsEnd /STK=1 /UG=Ghi.3648 /UG_TITLE=Transcribed locus, moderately similar to NP_198870.1 ATP binding kinase protein kinase protein serinethreonine kinase protein-tyrosine kinase (Arabidopsis thaliana) /REP_ORG=G. hirsutum
GhiAffx.39736.1.S1_at	DT048297	Ghi.19246	4.19702	0	gb:DT048297 /DB_XREF=gi:72271714 /DB_XREF=COT_CY_H11 /TID=GhiAffx.39736.1 /CNT=2 /FEA=EST /TIER=ConsEnd /STK=1 /NOTE=sequence(s) not in UniGene /REP_ORG=G. hirsutum
Ghi.5109.1.A1_at	DT462403	Ghi.5109	4.19624	0	gb:DT462403 /DB_XREF=gi:73859664 /DB_XREF=GH_CHX12A15.r /CLONE=GH_CHX12A15 /TID=Ghi.5109.1 /CNT=2 /FEA=EST /TIER=ConsEnd /STK=2 /UG=Ghi.5109 /UG_TITLE=Transcribed locus, weakly similar to NP_568779.1 unknown protein (Arabidopsis thaliana) /REP_ORG=G. hirsutum
Gra.2105.1.A1_s_at	CO123877	Gra.2105	4.18941	0	gb:CO123877 /DB_XREF=gi:48822564 /DB_XREF=GR__Eb06F22.r /CLONE=GR__Eb06F22 /TID=Gra.2105.1 /CNT=3 /FEA=EST /TIER=ConsEnd /STK=1 /UG=Gra.2105 /UG_TITLE=Transcribed locus, weakly similar to NP_194154.1 acyl-CoA binding protein, putative ACBP, putative (Arabidopsis thaliana) /REP_ORG=G. raimondii
GhiAffx.2173.2.S1_at	DW235352.1	Ghi.19441	4.18925	0	gb:DW235352.1 dbest_id:34839518 /TID=GhiAffx.2173.2 /CNT=3 /FEA=EST /TIER=ConsEnd /STK=0 /NOTE=sequence(s) not in UniGene /REP_ORG=
Ghi.10074.2.S1_at	DT461698	Ghi.10074	4.18794	1.84408	gb:DT461698 /DB_XREF=gi:73858959 /DB_XREF=GH_CHX03D11.x /CLONE=GH_CHX03D11 /TID=Ghi.10074.2 /CNT=2 /FEA=EST /TIER=ConsEnd /STK=0 /UG=Ghi.10074 /UG_TITLE=Transcribed locus, moderately similar to NP_180563.1 catalytic protein phosphatase type 2C protein serinethreonine phosphatase (Arabidopsis thaliana) /REP_ORG=G. hirsutum
Gra.1630.2.S1_x_at	CO127361	Gra.1630	4.18788	0	gb:CO127361 /DB_XREF=gi:48828971 /DB_XREF=GR__Eb11O03.r /CLONE=GR__Eb11O03 /TID=Gra.1630.2 /CNT=4 /FEA=EST /TIER=ConsEnd /STK=2 /UG=Gra.1630 /UG_TITLE=Transcribed locus, weakly similar to NP_172147.2 2-oxoglutarate-dependent dioxygenase, putative (Arabidopsis thaliana) /REP_ORG=G. raimondii
Ghi.9206.2.A1_at	DT462450	Ghi.9206	4.18368	0	gb:DT462450 /DB_XREF=gi:73859711 /DB_XREF=GH_CHX12B18.r /CLONE=GH_CHX12B18 /TID=Ghi.9206.2 /CNT=1 /FEA=EST /TIER=ConsEnd /STK=1 /UG=Ghi.9206 /UG_TITLE=Transcribed locus, weakly similar to NP_194930.1 unknown protein (Arabidopsis thaliana) /REP_ORG=G. hirsutum
Ghi.10783.1.S1_at	DT457520	Ghi.10783	4.18213	0	gb:DT457520 /DB_XREF=gi:73848500 /DB_XREF=GH_ON34K22.r /CLONE=GH_ON34K22 /TID=Ghi.10783.1 /CNT=4 /FEA=EST /TIER=ConsEnd /STK=0 /UG=Ghi.10783 /UG_TITLE=Transcribed locus, weakly similar to NP_196140.1 unknown protein (Arabidopsis thaliana) /REP_ORG=G. hirsutum
Ghi.5893.1.S1_at	AI730342	Ghi.5893	4.18106	0	gb:AI730342 /DB_XREF=gi:5049194 /DB_XREF=BNLGHi6684 /TID=Ghi.5893.1 /CNT=4 /FEA=EST /TIER=ConsEnd /STK=0 /UG=Ghi.5893 /UG_TITLE=Transcribed locus, moderately similar to NP_192641.2 ATISA3ISA3; alpha-amylase hydrolase, hydrolyzing O-glycosyl compounds (Arabidopsis thaliana) /REP_ORG=G. hirsutum
GhiAffx.59945.1.S1_at	DW501921.1	Ghi.12882	4.17943	0	gb:DW501921.1 dbest_id:35106349 /TID=GhiAffx.59945.1 /CNT=4 /FEA=EST /TIER=ConsEnd /STK=0 /NOTE=sequence(s) not in UniGene /REP_ORG=
Ghi.6741.1.S1_at	CA993398	Ghi.6741	4.17152	0	gb:CA993398 /DB_XREF=gi:31073119 /DB_XREF=pAR07C06 /TID=Ghi.6741.1 /CNT=1 /FEA=EST /TIER=ConsEnd /STK=0 /UG=Ghi.6741 /UG_TITLE=Transcribed locus /REP_ORG=G. hirsutum
GhiAffx.7202.1.S1_at	DW509263.1	Ghi.21828	4.17134	0	gb:DW509263.1 dbest_id:35115046 /TID=GhiAffx.7202.1 /CNT=2 /FEA=EST /TIER=ConsEnd /STK=1 /NOTE=sequence(s) not in UniGene /REP_ORG=
Ghi.3858.2.A1_at	DV849835	Ghi.3858	4.16739	0	gb:DV849835 /DB_XREF=gi:82756273 /DB_XREF=GH_LSL25A11.f /CLONE=GH_LSL25A11 /TID=Ghi.3858.2 /CNT=1 /FEA=EST /TIER=ConsEnd /STK=0 /UG=Ghi.3858 /UG_TITLE=Transcribed locus, moderately similar to NP_565878.1 unknown protein (Arabidopsis thaliana) /REP_ORG=G. hirsutum
GhiAffx.7895.1.S1_x_at	DW516920.1	---	4.16236	0	gb:DW516920.1 dbest_id:35122703 /TID=GhiAffx.7895.1 /CNT=2 /FEA=EST /TIER=ConsEnd /STK=1 /NOTE=sequence(s) not in UniGene /REP_ORG=
Ghi.3583.4.A1_s_at	DT462041	Ghi.3583	4.16043	0	gb:DT462041 /DB_XREF=gi:73859302 /DB_XREF=GH_CHX07H08.x /CLONE=GH_CHX07H08 /TID=Ghi.3583.4 /CNT=5 /FEA=EST /TIER=ConsEnd /STK=0 /UG=Ghi.3583 /UG_TITLE=Transcribed locus, moderately similar to NP_198924.1 glycerophosphodiester phosphodiesterase (Arabidopsis thaliana) /REP_ORG=G. hirsutum
Ghi.2979.2.A1_at	DR455770	Ghi.17577	4.15567	0	gb:DR455770 /DB_XREF=gi:84167122 /DB_XREF=CM037G04 /TID=Ghi.2979.2 /CNT=5 /FEA=EST /TIER=ConsEnd /STK=0 /UG=Ghi.2979 /UG_TITLE=Transcribed locus, moderately similar to NP_179802.2 protein binding ubiquitin-protein ligase zinc ion binding (Arabidopsis thaliana) /REP_ORG=G. hirsutum
Ghi.1732.1.S1_at	DN758631	Ghi.10577	4.15217	0	gb:DN758631 /DB_XREF=gi:84144389 /DB_XREF=G.hir-stem 1135 /TID=Ghi.1732.1 /CNT=9 /FEA=EST /TIER=ConsEnd /STK=0 /UG=Ghi.1732 /UG_TITLE=Transcribed locus /REP_ORG=G. hirsutum
GhiAffx.13109.1.S1_at	DT460821	---	4.15138	0	gb:DT460821 /DB_XREF=gi:73851801 /DB_XREF=GH_ON39O11.r /CLONE=GH_ON39O11 /TID=GhiAffx.13109.1 /CNT=2 /FEA=EST /TIER=ConsEnd /STK=1 /NOTE=sequence(s) not in UniGene /REP_ORG=G. hirsutum
Ghi.9154.1.A1_at	DT464102	Ghi.9154	4.1459	0	gb:DT464102 /DB_XREF=gi:73861363 /DB_XREF=GH_CHX15A10.r /CLONE=GH_CHX15A10 /TID=Ghi.9154.1 /CNT=4 /FEA=EST /TIER=ConsEnd /STK=1 /UG=Ghi.9154 /UG_TITLE=Transcribed locus /REP_ORG=G. hirsutum
Ghi.1372.1.A1_at	DN800854	Ghi.48	4.14589	0	gb:DN800854 /DB_XREF=gi:84151499 /DB_XREF=G.hir-15-20 DAA bolls drought stressed 9 /TID=Ghi.1372.1 /CNT=3 /FEA=EST /TIER=ConsEnd /STK=0 /UG=Ghi.1372 /UG_TITLE=Transcribed locus /REP_ORG=G. hirsutum
Ghi.9263.1.A1_a_at	DT463505	Ghi.9263	4.14473	0	gb:DT463505 /DB_XREF=gi:73860766 /DB_XREF=GH_CHX13K12.r /CLONE=GH_CHX13K12 /TID=Ghi.9263.1 /CNT=1 /FEA=EST /TIER=ConsEnd /STK=1 /UG=Ghi.9263 /UG_TITLE=Transcribed locus, weakly similar to NP_189162.1 AGC2-1 (OXIDATIVE SIGNAL-INDUCIBLE1); kinase (Arabidopsis thaliana) /REP_ORG=G. hirsutum
Ghi.8064.2.S1_s_at	AF159139.1	Ghi.8064	4.13932	0	gb:AF159139.1 /DB_XREF=gi:5442427 /GEN=PLD /TID=Ghi.8064.2 /CNT=1 /FEA=FLmRNA /TIER=FL /STK=1 /UG=Ghi.8064 /DEF=Gossypium hirsutum phospholipase D (PLD) mRNA, complete cds. /PROD=phospholipase D /FL=gb:AF159139.1 /REP_ORG=G. hirsutum
GhiAffx.13394.2.S1_x_at	DW498413.1	Ghi.15546	4.1331	0	gb:DW498413.1 dbest_id:35102841 /TID=GhiAffx.13394.2 /CNT=2 /FEA=EST /TIER=ConsEnd /STK=1 /NOTE=sequence(s) not in UniGene /REP_ORG=
GhiAffx.10406.1.S1_at	DW519768.1	Ghi.12872	4.13285	0	gb:DW519768.1 dbest_id:35125551 /TID=GhiAffx.10406.1 /CNT=3 /FEA=EST /TIER=ConsEnd /STK=1 /NOTE=sequence(s) not in UniGene /REP_ORG=
GhiAffx.5990.1.A1_s_at	DW238165.1	Ghi.4882	4.13259	0	gb:DW238165.1 dbest_id:34842331 /TID=GhiAffx.5990.1 /CNT=1 /FEA=EST /TIER=ConsEnd /STK=1 /NOTE=sequence(s) not in UniGene /REP_ORG=
GhiAffx.21575.1.S1_at	DW495935.1	---	4.12114	0	gb:DW495935.1 dbest_id:35100363 /TID=GhiAffx.21575.1 /CNT=3 /FEA=EST /TIER=ConsEnd /STK=0 /NOTE=sequence(s) not in UniGene /REP_ORG=
Ghi.3533.3.S1_s_at	DT465055	Ghi.3533	4.12071	0	gb:DT465055 /DB_XREF=gi:73862316 /DB_XREF=GH_CHX16L12.f /CLONE=GH_CHX16L12 /TID=Ghi.3533.3 /CNT=3 /FEA=EST /TIER=ConsEnd /STK=0 /UG=Ghi.3533 /UG_TITLE=Transcribed locus /REP_ORG=G. hirsutum
Ghi.6443.2.A1_s_at	CF932178	Ghi.6443	4.12035	0.00854976	gb:CF932178 /DB_XREF=gi:45438759 /DB_XREF=SP11-C1(P22-C7) /CLONE=SP11-C1(P22-C7) /TID=Ghi.6443.2 /CNT=6 /FEA=EST /TIER=ConsEnd /STK=0 /UG=Ghi.6443 /UG_TITLE=Transcribed locus, moderately similar to NP_187123.1 PR4 (PATHOGENESIS-RELATED 4) (Arabidopsis thaliana) /REP_ORG=G. hirsutum
GhiAffx.40901.1.S1_at	DW500212.1	Ghi.18488	4.11898	0	gb:DW500212.1 dbest_id:35104640 /TID=GhiAffx.40901.1 /CNT=2 /FEA=EST /TIER=ConsEnd /STK=1 /NOTE=sequence(s) not in UniGene /REP_ORG=
GhiAffx.2003.1.S1_at	DT463880	Ghi.15633	4.11838	0	gb:DT463880 /DB_XREF=gi:73861141 /DB_XREF=GH_CHX14G15.r /CLONE=GH_CHX14G15 /TID=GhiAffx.2003.1 /CNT=6 /FEA=EST /TIER=ConsEnd /STK=1 /NOTE=sequence(s) not in UniGene /REP_ORG=G. hirsutum
GhiAffx.5627.1.S1_at	DW237103.1	Ghi.15450	4.11495	0.0366566	gb:DW237103.1 dbest_id:34841269 /TID=GhiAffx.5627.1 /CNT=3 /FEA=EST /TIER=ConsEnd /STK=0 /NOTE=sequence(s) not in UniGene /REP_ORG=
Ghi.7640.1.S1_at	DN760028	Ghi.7640	4.10963	0	gb:DN760028 /DB_XREF=gi:84145786 /DB_XREF=G.hir-stem 2535 /TID=Ghi.7640.1 /CNT=2 /FEA=EST /TIER=ConsEnd /STK=0 /UG=Ghi.7640 /UG_TITLE=Transcribed locus, moderately similar to NP_197764.1 DNA binding (Arabidopsis thaliana) /REP_ORG=G. hirsutum
Ghi.4370.1.A1_at	DT053785	Ghi.4370	4.10345	0	gb:DT053785 /DB_XREF=gi:72283051 /DB_XREF=COT_FU_G08 /TID=Ghi.4370.1 /CNT=1 /FEA=EST /TIER=ConsEnd /STK=1 /UG=Ghi.4370 /UG_TITLE=Transcribed locus, strongly similar to NP_196254.1 structural constituent of ribosome (Arabidopsis thaliana) /REP_ORG=G. hirsutum
Gra.660.1.A1_at	CO088543	Gra.660	4.10276	0	gb:CO088543 /DB_XREF=gi:48779177 /DB_XREF=GR__Ea07I24.r /CLONE=GR__Ea07I24 /TID=Gra.660.1 /CNT=1 /FEA=EST /TIER=ConsEnd /STK=1 /UG=Gra.660 /UG_TITLE=Transcribed locus /REP_ORG=G. raimondii
Ghi.3054.1.A1_s_at	DT468995	Ghi.10876	4.10186	0	gb:DT468995 /DB_XREF=gi:73866257 /DB_XREF=GH_CHX22M14.r /CLONE=GH_CHX22M14 /TID=Ghi.3054.1 /CNT=6 /FEA=EST /TIER=ConsEnd /STK=1 /UG=Ghi.3054 /UG_TITLE=Transcribed locus, moderately similar to NP_195415.3 unknown protein (Arabidopsis thaliana) /REP_ORG=G. hirsutum
GhiAffx.4738.1.S1_at	DW509881.1	Ghi.16783	4.09777	0	gb:DW509881.1 dbest_id:35115664 /TID=GhiAffx.4738.1 /CNT=2 /FEA=EST /TIER=ConsEnd /STK=1 /NOTE=sequence(s) not in UniGene /REP_ORG=
GhiAffx.47722.1.A1_at	DT459113	---	4.09181	0	gb:DT459113 /DB_XREF=gi:73850093 /DB_XREF=GH_ON37C20.r /CLONE=GH_ON37C20 /TID=GhiAffx.47722.1 /CNT=2 /FEA=EST /TIER=ConsEnd /STK=1 /NOTE=sequence(s) not in UniGene /REP_ORG=G. hirsutum
Ghi.7941.1.S1_at	AI055173	Ghi.7941	4.09167	0	gb:AI055173 /DB_XREF=gi:3326287 /DB_XREF=coau0003D23 /CLONE=coau0003D23 /TID=Ghi.7941.1 /CNT=1 /FEA=EST /TIER=ConsEnd /STK=0 /UG=Ghi.7941 /UG_TITLE=Transcribed locus /REP_ORG=G. hirsutum
GhiAffx.5304.1.S1_s_at	DW491676.1	Ghi.8975	4.08553	0	gb:DW491676.1 dbest_id:35096104 /TID=GhiAffx.5304.1 /CNT=3 /FEA=EST /TIER=ConsEnd /STK=0 /NOTE=sequence(s) not in UniGene /REP_ORG=
Ghi.8698.1.S1_x_at	DT467852	Ghi.8698	4.08285	0	gb:DT467852 /DB_XREF=gi:73865113 /DB_XREF=GH_CHX21A12.f /CLONE=GH_CHX21A12 /TID=Ghi.8698.1 /CNT=3 /FEA=EST /TIER=ConsEnd /STK=0 /UG=Ghi.8698 /UG_TITLE=Transcribed locus, strongly similar to NP_180198.1 GPA1 (G PROTEIN ALPHA SUBUNIT 1); signal transducer (Arabidopsis thaliana) /REP_ORG=G. hirsutum
Ghi.1133.1.S1_at	DR457798	Ghi.1133	4.08082	0	gb:DR457798 /DB_XREF=gi:84169150 /DB_XREF=CM059A08 /TID=Ghi.1133.1 /CNT=2 /FEA=EST /TIER=ConsEnd /STK=0 /UG=Ghi.1133 /UG_TITLE=Transcribed locus, strongly similar to XP_468271.1 putative 60S ribosomal protein L39 (Oryza sativa (japonica cultivar-group)) /REP_ORG=G. hirsutum
GhiAffx.37268.1.A1_at	DT459900	Ghi.16411	4.07956	0	gb:DT459900 /DB_XREF=gi:73850880 /DB_XREF=GH_ON38H05.r /CLONE=GH_ON38H05 /TID=GhiAffx.37268.1 /CNT=2 /FEA=EST /TIER=ConsEnd /STK=0 /NOTE=sequence(s) not in UniGene /REP_ORG=G. hirsutum
Ghi.9155.2.S1_s_at	DT464124	Ghi.9155	4.07641	0	gb:DT464124 /DB_XREF=gi:73861385 /DB_XREF=GH_CHX15B02.f /CLONE=GH_CHX15B02 /TID=Ghi.9155.2 /CNT=2 /FEA=EST /TIER=ConsEnd /STK=0 /UG=Ghi.9155 /UG_TITLE=Transcribed locus /REP_ORG=G. hirsutum
Ghi.6476.1.S1_at	CD486633	Ghi.6476	4.07315	0	gb:CD486633 /DB_XREF=gi:31407598 /DB_XREF=CRH5.1F03 /CLONE=CRH5.1F03 /TID=Ghi.6476.1 /CNT=2 /FEA=EST /TIER=ConsEnd /STK=0 /UG=Ghi.6476 /UG_TITLE=Transcribed locus, weakly similar to XP_475863.1 unknown protein (Oryza sativa (japonica cultivar-group)) /REP_ORG=G. hirsutum
Ghi.9153.1.S1_x_at	DT464094	Ghi.9153	4.07019	0.0333442	gb:DT464094 /DB_XREF=gi:73861355 /DB_XREF=GH_CHX15A04.r /CLONE=GH_CHX15A04 /TID=Ghi.9153.1 /CNT=2 /FEA=EST /TIER=ConsEnd /STK=1 /UG=Ghi.9153 /UG_TITLE=Transcribed locus, weakly similar to NP_171656.1 metal ion binding (Arabidopsis thaliana) /REP_ORG=G. hirsutum
Ghi.7192.1.S1_at	DT463668	Ghi.7192	4.06487	0	gb:DT463668 /DB_XREF=gi:73860929 /DB_XREF=GH_CHX13O07.r /CLONE=GH_CHX13O07 /TID=Ghi.7192.1 /CNT=3 /FEA=EST /TIER=ConsEnd /STK=1 /UG=Ghi.7192 /UG_TITLE=Transcribed locus /REP_ORG=G. hirsutum
Ghi.3440.1.A1_at	DT465801	Ghi.3440	4.06171	0.0292223	gb:DT465801 /DB_XREF=gi:73863062 /DB_XREF=GH_CHX17P08.r /CLONE=GH_CHX17P08 /TID=Ghi.3440.1 /CNT=2 /FEA=EST /TIER=ConsEnd /STK=1 /UG=Ghi.3440 /UG_TITLE=Transcribed locus, weakly similar to NP_568307.3 SAG101 (SENESCENCE-ASSOCIATED GENE 101); triacylglycerol lipase (Arabidopsis thaliana) /REP_ORG=G. hirsutum
Gra.1608.2.A1_s_at	CO119725	---	4.0612	0	gb:CO119725 /DB_XREF=gi:48818412 /DB_XREF=GR__Eb022M20.r /CLONE=GR__Eb022M20 /TID=Gra.1608.2 /CNT=1 /FEA=EST /TIER=ConsEnd /STK=1 /UG=Gra.1608 /UG_TITLE=Transcribed locus, weakly similar to NP_176261.1 DNA-directed RNA polymerase, putative (Arabidopsis thaliana) /REP_ORG=G. raimondii
Ghi.827.1.S1_s_at	DR454360	Ghi.827	4.05756	0	gb:DR454360 /DB_XREF=gi:84165712 /DB_XREF=CM023A01 /TID=Ghi.827.1 /CNT=1 /FEA=EST /TIER=ConsEnd /STK=0 /UG=Ghi.827 /UG_TITLE=Transcribed locus /REP_ORG=G. hirsutum
Ghi.847.1.A1_s_at	DR454059	Ghi.2787	4.05729	0	gb:DR454059 /DB_XREF=gi:84165411 /DB_XREF=CM019G09 /TID=Ghi.847.1 /CNT=1 /FEA=EST /TIER=ConsEnd /STK=0 /UG=Ghi.847 /UG_TITLE=Transcribed locus /REP_ORG=G. hirsutum
Ghi.2132.1.S1_s_at	DT545799	Ghi.2132	4.05558	0	gb:DT545799 /DB_XREF=gi:78325525 /DB_XREF=EST1056439 /TID=Ghi.2132.1 /CNT=4 /FEA=EST /TIER=ConsEnd /STK=0 /UG=Ghi.2132 /UG_TITLE=Transcribed locus, moderately similar to NP_192575.2 structural constituent of ribosome transcription factor transcriptional elongation regulator (Arabidopsis thaliana) /REP_ORG=G. hirsutum
Ghi.3143.1.S1_at	DN760117	Ghi.3143	4.05319	0	gb:DN760117 /DB_XREF=gi:84145875 /DB_XREF=G.hir-stem 2624 /TID=Ghi.3143.1 /CNT=4 /FEA=EST /TIER=ConsEnd /STK=0 /UG=Ghi.3143 /UG_TITLE=Transcribed locus /REP_ORG=G. hirsutum
Ghi.1915.1.S1_at	DV849191	Ghi.1915	4.0528	0	gb:DV849191 /DB_XREF=gi:82755629 /DB_XREF=GH_LSL08A07.f /CLONE=GH_LSL08A07 /TID=Ghi.1915.1 /CNT=1 /FEA=EST /TIER=ConsEnd /STK=0 /UG=Ghi.1915 /UG_TITLE=Transcribed locus /REP_ORG=G. hirsutum
Ghi.1677.1.S1_at	DN760023	Ghi.1677	4.04981	0	gb:DN760023 /DB_XREF=gi:84145781 /DB_XREF=G.hir-stem 2530 /TID=Ghi.1677.1 /CNT=1 /FEA=EST /TIER=ConsEnd /STK=0 /UG=Ghi.1677 /UG_TITLE=Transcribed locus, weakly similar to NP_188221.2 MFP1 (MAR BINDING FILAMENT-LIKE PROTEIN 1) (Arabidopsis thaliana) /REP_ORG=G. hirsutum
Ghi.4013.1.A1_at	CO492517	Ghi.4013	4.04942	0.0333442	gb:CO492517 /DB_XREF=gi:54117008 /DB_XREF=G.h.fbr-sw01907 /TID=Ghi.4013.1 /CNT=3 /FEA=EST /TIER=ConsEnd /STK=0 /UG=Ghi.4013 /UG_TITLE=Transcribed locus, moderately similar to NP_174411.2 ZIP10; cation transporter (Arabidopsis thaliana) /REP_ORG=G. hirsutum
Ghi.6601.1.S1_x_at	CB097377	Ghi.2450	4.04331	0	gb:CB097377 /DB_XREF=gi:27921560 /DB_XREF=ESTNAUCRI00015 /TID=Ghi.6601.1 /CNT=1 /FEA=EST /TIER=ConsEnd /STK=1 /UG=Ghi.6601 /UG_TITLE=Transcribed locus /REP_ORG=G. hirsutum
GraAffx.21341.1.A1_s_at	CO130254	---	4.04274	0	gb:CO130254 /DB_XREF=gi:48879232 /DB_XREF=GR__Eb31O12.r /CLONE=GR__Eb31O12 /TID=GraAffx.21341.1 /CNT=2 /FEA=EST /TIER=ConsEnd /STK=1 /NOTE=sequence(s) not in UniGene /REP_ORG=G. raimondii
GhiAffx.59727.1.S1_s_at	DW498408.1	Ghi.13717	4.03917	0	gb:DW498408.1 dbest_id:35102836 /TID=GhiAffx.59727.1 /CNT=5 /FEA=EST /TIER=ConsEnd /STK=0 /NOTE=sequence(s) not in UniGene /REP_ORG=
GhiAffx.16092.1.A1_s_at	DW501210.1	Ghi.8192	4.03279	0.983157	gb:DW501210.1 dbest_id:35105638 /TID=GhiAffx.16092.1 /CNT=2 /FEA=EST /TIER=ConsEnd /STK=0 /NOTE=sequence(s) not in UniGene /REP_ORG=
Ghi.1247.2.A1_x_at	DT052563	Ghi.1247	4.03248	0	gb:DT052563 /DB_XREF=gi:72280530 /DB_XREF=COT_FD_H03 /TID=Ghi.1247.2 /CNT=4 /FEA=EST /TIER=ConsEnd /STK=1 /UG=Ghi.1247 /UG_TITLE=Transcribed locus, weakly similar to NP_564752.1 unknown protein (Arabidopsis thaliana) /REP_ORG=G. hirsutum
Ghi.5693.2.S1_s_at	DT458685	Ghi.5693	4.03061	0	gb:DT458685 /DB_XREF=gi:73849665 /DB_XREF=GH_ON36I10.f /CLONE=GH_ON36I10 /TID=Ghi.5693.2 /CNT=2 /FEA=EST /TIER=ConsEnd /STK=0 /UG=Ghi.5693 /UG_TITLE=Transcribed locus, moderately similar to NP_568628.1 unknown protein (Arabidopsis thaliana) /REP_ORG=G. hirsutum
GhiAffx.12945.1.S1_at	DT463227	---	4.02686	0	gb:DT463227 /DB_XREF=gi:73860488 /DB_XREF=GH_CHX13E03.r /CLONE=GH_CHX13E03 /TID=GhiAffx.12945.1 /CNT=2 /FEA=EST /TIER=ConsEnd /STK=1 /NOTE=sequence(s) not in UniGene /REP_ORG=G. hirsutum
GhiAffx.43430.1.S1_at	DW513221.1	Ghi.2450	4.02045	0.0238141	gb:DW513221.1 dbest_id:35119004 /TID=GhiAffx.43430.1 /CNT=4 /FEA=EST /TIER=ConsEnd /STK=1 /NOTE=sequence(s) not in UniGene /REP_ORG=
GhiAffx.25192.1.A1_s_at	DW515109.1	Ghi.14963	4.01942	0	gb:DW515109.1 dbest_id:35120892 /TID=GhiAffx.25192.1 /CNT=3 /FEA=EST /TIER=ConsEnd /STK=1 /NOTE=sequence(s) not in UniGene /REP_ORG=
Ghi.5568.1.A1_at	DT468734	Ghi.5568	4.01877	0	gb:DT468734 /DB_XREF=gi:73865996 /DB_XREF=GH_CHX22F22.r /CLONE=GH_CHX22F22 /TID=Ghi.5568.1 /CNT=2 /FEA=EST /TIER=ConsEnd /STK=1 /UG=Ghi.5568 /UG_TITLE=Transcribed locus, weakly similar to NP_198644.1 PR5K; kinase transmembrane receptor protein serinethreonine kinase (Arabidopsis thaliana) /REP_ORG=G. hirsutum
GhiAffx.39637.1.S1_at	DT466912	Ghi.13548	4.01345	0	gb:DT466912 /DB_XREF=gi:73864173 /DB_XREF=GH_CHX19J17.f /CLONE=GH_CHX19J17 /TID=GhiAffx.39637.1 /CNT=2 /FEA=EST /TIER=ConsEnd /STK=0 /NOTE=sequence(s) not in UniGene /REP_ORG=G. hirsutum
Ghi.3718.1.A1_at	DT462306	Ghi.3718	4.01138	0	gb:DT462306 /DB_XREF=gi:73859567 /DB_XREF=GH_CHX11B10.x /CLONE=GH_CHX11B10 /TID=Ghi.3718.1 /CNT=1 /FEA=EST /TIER=ConsEnd /STK=0 /UG=Ghi.3718 /UG_TITLE=Transcribed locus /REP_ORG=G. hirsutum
GhiAffx.39637.1.A1_s_at	DW235828.1	Ghi.13548	4.00907	0	gb:DW235828.1 dbest_id:34839994 /TID=GhiAffx.39637.1 /CNT=2 /FEA=EST /TIER=ConsEnd /STK=0 /NOTE=sequence(s) not in UniGene /REP_ORG=
GhiAffx.197.1.S1_x_at	DW505707.1	Ghi.12519	4.00837	0	gb:DW505707.1 dbest_id:35111490 /TID=GhiAffx.197.1 /CNT=3 /FEA=EST /TIER=ConsEnd /STK=0 /NOTE=sequence(s) not in UniGene /REP_ORG=
Ghi.686.1.S1_at	DT466466	Ghi.19632	4.00602	0	gb:DT466466 /DB_XREF=gi:73863727 /DB_XREF=GH_CHX18O15.r /CLONE=GH_CHX18O15 /TID=Ghi.686.1 /CNT=2 /FEA=EST /TIER=ConsEnd /STK=1 /UG=Ghi.686 /UG_TITLE=Transcribed locus, weakly similar to XP_473717.1 OSJNBa0086O06.17 (Oryza sativa (japonica cultivar-group)) /REP_ORG=G. hirsutum
Ghi.3544.3.A1_a_at	DR462576	Ghi.3544	4.00378	0	gb:DR462576 /DB_XREF=gi:84173928 /DB_XREF=CM109D06 /TID=Ghi.3544.3 /CNT=2 /FEA=EST /TIER=ConsEnd /STK=0 /UG=Ghi.3544 /UG_TITLE=Transcribed locus, moderately similar to NP_851016.1 unknown protein (Arabidopsis thaliana) /REP_ORG=G. hirsutum
Ghi.9312.3.A1_x_at	DT051003	Ghi.9312	4.00055	0	gb:DT051003 /DB_XREF=gi:72277170 /DB_XREF=COT_EG_F05 /TID=Ghi.9312.3 /CNT=2 /FEA=EST /TIER=ConsEnd /STK=1 /UG=Ghi.9312 /UG_TITLE=Transcribed locus, moderately similar to NP_197201.1 oxidoreductase zinc ion binding (Arabidopsis thaliana) /REP_ORG=G. hirsutum
Ghi.6415.1.S1_s_at	DR453806	Ghi.6415	3.99257	0	gb:DR453806 /DB_XREF=gi:84165158 /DB_XREF=CM017B06 /TID=Ghi.6415.1 /CNT=2 /FEA=EST /TIER=ConsEnd /STK=0 /UG=Ghi.6415 /UG_TITLE=Transcribed locus, moderately similar to NP_190227.1 unknown protein (Arabidopsis thaliana) /REP_ORG=G. hirsutum
Ghi.1957.1.S1_at	DV848706	Ghi.1957	3.99105	0	gb:DV848706 /DB_XREF=gi:82755144 /DB_XREF=GH_LSL02B06.f /CLONE=GH_LSL02B06 /TID=Ghi.1957.1 /CNT=1 /FEA=EST /TIER=ConsEnd /STK=0 /UG=Ghi.1957 /UG_TITLE=Transcribed locus, weakly similar to NP_198554.1 heat shock protein binding unfolded protein binding (Arabidopsis thaliana) /REP_ORG=G. hirsutum
GhiAffx.19727.1.S1_at	DW490445.1	Ghi.12635	3.98753	0	gb:DW490445.1 dbest_id:35094873 /TID=GhiAffx.19727.1 /CNT=5 /FEA=EST /TIER=ConsEnd /STK=0 /NOTE=sequence(s) not in UniGene /REP_ORG=
Ghi.5947.1.S1_s_at	CA993661	Ghi.5947	3.98662	0.00854976	gb:CA993661 /DB_XREF=gi:31073382 /DB_XREF=pAR09C03 /TID=Ghi.5947.1 /CNT=5 /FEA=EST /TIER=ConsEnd /STK=0 /UG=Ghi.5947 /UG_TITLE=Transcribed locus, moderately similar to NP_200240.1 unknown protein (Arabidopsis thaliana) /REP_ORG=G. hirsutum
GhiAffx.50396.2.S1_s_at	DW508926.1	Ghi.15753	3.9846	0	gb:DW508926.1 dbest_id:35114709 /TID=GhiAffx.50396.2 /CNT=3 /FEA=EST /TIER=ConsEnd /STK=1 /NOTE=sequence(s) not in UniGene /REP_ORG=
Gra.2721.1.A1_at	CO090196	Gra.2721	3.98383	0	gb:CO090196 /DB_XREF=gi:48785639 /DB_XREF=GR__Ea10A17.r /CLONE=GR__Ea10A17 /TID=Gra.2721.1 /CNT=3 /FEA=EST /TIER=ConsEnd /STK=1 /UG=Gra.2721 /UG_TITLE=Transcribed locus, weakly similar to XP_480293.1 unknown protein (Oryza sativa (japonica cultivar-group)) /REP_ORG=G. raimondii
Ghi.1468.1.S1_s_at	DN781357	Ghi.11507	3.98293	0.0238141	gb:DN781357 /DB_XREF=gi:84150057 /DB_XREF=G.hir-Cotyledon 1885 /TID=Ghi.1468.1 /CNT=1 /FEA=EST /TIER=ConsEnd /STK=0 /UG=Ghi.1468 /UG_TITLE=Transcribed locus, weakly similar to NP_564416.1 unknown protein (Arabidopsis thaliana) /REP_ORG=G. hirsutum
GarAffx.37322.1.S1_s_at	AY626160.1	---	3.98169	0	gb:AY626160.1 /DB_XREF=gi:51872288 /TID=GarAffx.37322.1 /CNT=3 /FEA=FLmRNA /TIER=FL /STK=1 /NOTE=sequence(s) not in UniGene /DEF=Gossypium arboreum myb family transcription factor 2fiber factor 1 mRNA, complete cds. /PROD=myb family transcription factor 2fiber factor1 /FL=gb:AY626160.1 /REP_ORG=G. arboreum
Gra.2227.1.A1_at	CO109183	Gra.2227	3.98117	0	gb:CO109183 /DB_XREF=gi:48807869 /DB_XREF=GR__Eb0041G22.r /CLONE=GR__Eb0041G22 /TID=Gra.2227.1 /CNT=4 /FEA=EST /TIER=ConsEnd /STK=2 /UG=Gra.2227 /UG_TITLE=Transcribed locus, moderately similar to NP_850354.1 ABC transporter family protein (Arabidopsis thaliana) /REP_ORG=G. raimondii
Ghi.5186.1.A1_at	DT048710	Ghi.5186	3.98049	0	gb:DT048710 /DB_XREF=gi:72272555 /DB_XREF=COT_DD_G10 /TID=Ghi.5186.1 /CNT=1 /FEA=EST /TIER=ConsEnd /STK=1 /UG=Ghi.5186 /UG_TITLE=Transcribed locus, weakly similar to XP_474065.1 OSJNBb0079B02.7 (Oryza sativa (japonica cultivar-group)) /REP_ORG=G. hirsutum
GhiAffx.1860.1.S1_at	DT468280	Ghi.19677	3.97817	0	gb:DT468280 /DB_XREF=gi:73865542 /DB_XREF=GH_CHX21K10.r /CLONE=GH_CHX21K10 /TID=GhiAffx.1860.1 /CNT=2 /FEA=EST /TIER=ConsEnd /STK=1 /NOTE=sequence(s) not in UniGene /REP_ORG=G. hirsutum
Ghi.5518.1.A1_at	DT047443	Ghi.16317	3.97633	0	gb:DT047443 /DB_XREF=gi:72270015 /DB_XREF=COT_CO_B02 /TID=Ghi.5518.1 /CNT=3 /FEA=EST /TIER=ConsEnd /STK=0 /UG=Ghi.5518 /UG_TITLE=Transcribed locus /REP_ORG=G. hirsutum
GraAffx.9648.1.S1_s_at	CO084661	---	3.97383	0	gb:CO084661 /DB_XREF=gi:48775295 /DB_XREF=GR__Ea01G09.r /CLONE=GR__Ea01G09 /TID=GraAffx.9648.1 /CNT=2 /FEA=EST /TIER=ConsEnd /STK=1 /NOTE=sequence(s) not in UniGene /REP_ORG=G. raimondii
GhiAffx.36373.1.S1_at	DW481359.1	---	3.97008	0	gb:DW481359.1 dbest_id:35085787 /TID=GhiAffx.36373.1 /CNT=3 /FEA=EST /TIER=ConsEnd /STK=0 /NOTE=sequence(s) not in UniGene /REP_ORG=
Ghi.1553.1.S1_at	DT462666	Ghi.1553	3.96808	0	gb:DT462666 /DB_XREF=gi:73859927 /DB_XREF=GH_CHX12G20.r /CLONE=GH_CHX12G20 /TID=Ghi.1553.1 /CNT=8 /FEA=EST /TIER=ConsEnd /STK=1 /UG=Ghi.1553 /UG_TITLE=Transcribed locus, weakly similar to XP_467807.1 putative diphenol oxidase (Oryza sativa (japonica cultivar-group)) /REP_ORG=G. hirsutum
Ghi.1816.1.S1_at	DV850351	Ghi.1816	3.9664	0	gb:DV850351 /DB_XREF=gi:82756789 /DB_XREF=GH_LSL31A05.f /CLONE=GH_LSL31A05 /TID=Ghi.1816.1 /CNT=1 /FEA=EST /TIER=ConsEnd /STK=0 /UG=Ghi.1816 /UG_TITLE=Transcribed locus /REP_ORG=G. hirsutum
Gra.1509.1.A1_at	CO126251	Gra.1509	3.96265	0	gb:CO126251 /DB_XREF=gi:48827861 /DB_XREF=GR__Eb10C20.r /CLONE=GR__Eb10C20 /TID=Gra.1509.1 /CNT=1 /FEA=EST /TIER=ConsEnd /STK=1 /UG=Gra.1509 /UG_TITLE=Transcribed locus /REP_ORG=G. raimondii
Ghi.2903.1.A1_at	DT466150	Ghi.2903	3.96067	0	gb:DT466150 /DB_XREF=gi:73863411 /DB_XREF=GH_CHX18H13.r /CLONE=GH_CHX18H13 /TID=Ghi.2903.1 /CNT=1 /FEA=EST /TIER=ConsEnd /STK=1 /UG=Ghi.2903 /UG_TITLE=Transcribed locus, moderately similar to NP_186871.1 unknown protein (Arabidopsis thaliana) /REP_ORG=G. hirsutum
Ghi.4019.1.A1_at	DT458321	Ghi.8830	3.95689	0	gb:DT458321 /DB_XREF=gi:73849301 /DB_XREF=GH_ON35P12.r /CLONE=GH_ON35P12 /TID=Ghi.4019.1 /CNT=1 /FEA=EST /TIER=ConsEnd /STK=1 /UG=Ghi.4019 /UG_TITLE=Transcribed locus, weakly similar to NP_195308.1 RNA binding aconitate hydratase hydro-lyase iron ion binding lyase (Arabidopsis thaliana) /REP_ORG=G. hirsutum
GhiAffx.24403.1.S1_s_at	DW510967.1	---	3.95644	0	gb:DW510967.1 dbest_id:35116750 /TID=GhiAffx.24403.1 /CNT=2 /FEA=EST /TIER=ConsEnd /STK=1 /NOTE=sequence(s) not in UniGene /REP_ORG=
Ghi.3139.1.A1_at	DT469066	Ghi.3139	3.95613	0	gb:DT469066 /DB_XREF=gi:73866328 /DB_XREF=GH_CHX22O12.r /CLONE=GH_CHX22O12 /TID=Ghi.3139.1 /CNT=3 /FEA=EST /TIER=ConsEnd /STK=0 /UG=Ghi.3139 /UG_TITLE=Transcribed locus, weakly similar to NP_172849.1 WRKY4; transcription factor (Arabidopsis thaliana) /REP_ORG=G. hirsutum
GhiAffx.4043.10.S1_at	DN827319	---	3.9555	0	gb:DN827319 /DB_XREF=gi:84158272 /DB_XREF=G.hir-20, 30 hrs post inoculation 629 /TID=GhiAffx.4043.10 /CNT=3 /FEA=EST /TIER=ConsEnd /STK=0 /NOTE=sequence(s) not in UniGene /REP_ORG=G. hirsutum
Ghi.3729.1.A1_at	DT462226	Ghi.3729	3.95314	0	gb:DT462226 /DB_XREF=gi:73859487 /DB_XREF=GH_CHX10B12.x /CLONE=GH_CHX10B12 /TID=Ghi.3729.1 /CNT=1 /FEA=EST /TIER=ConsEnd /STK=0 /UG=Ghi.3729 /UG_TITLE=Transcribed locus /REP_ORG=G. hirsutum
Ghi.283.1.S1_s_at	DR461145	Ghi.283	3.95277	0	gb:DR461145 /DB_XREF=gi:84172497 /DB_XREF=CM094C09 /TID=Ghi.283.1 /CNT=1 /FEA=EST /TIER=ConsEnd /STK=0 /UG=Ghi.283 /UG_TITLE=Transcribed locus, weakly similar to NP_196056.2 alpha-amylase hydrolase, hydrolyzing O-glycosyl compounds (Arabidopsis thaliana) /REP_ORG=G. hirsutum
Ghi.9154.1.S1_at	DT462489	Ghi.9154	3.95113	0	gb:DT462489 /DB_XREF=gi:73859750 /DB_XREF=GH_CHX12C17.r /CLONE=GH_CHX12C17 /TID=Ghi.9154.1 /CNT=4 /FEA=EST /TIER=ConsEnd /STK=1 /UG=Ghi.9154 /UG_TITLE=Transcribed locus /REP_ORG=G. hirsutum
GhiAffx.63419.1.S1_at	DW505317.1	Ghi.1302	3.94865	0	gb:DW505317.1 dbest_id:35111100 /TID=GhiAffx.63419.1 /CNT=3 /FEA=EST /TIER=ConsEnd /STK=1 /NOTE=sequence(s) not in UniGene /REP_ORG=
Ghi.621.1.S1_at	CD485192	Ghi.621	3.94657	0	gb:CD485192 /DB_XREF=gi:31406460 /DB_XREF=EST03007 /TID=Ghi.621.1 /CNT=3 /FEA=EST /TIER=ConsEnd /STK=0 /UG=Ghi.621 /UG_TITLE=Transcribed locus, strongly similar to NP_187609.2 unknown protein (Arabidopsis thaliana) /REP_ORG=G. hirsutum
Ghi.3701.1.A1_at	DT462453	Ghi.3701	3.94629	0	gb:DT462453 /DB_XREF=gi:73859714 /DB_XREF=GH_CHX12B20.f /CLONE=GH_CHX12B20 /TID=Ghi.3701.1 /CNT=5 /FEA=EST /TIER=ConsEnd /STK=0 /UG=Ghi.3701 /UG_TITLE=Transcribed locus /REP_ORG=G. hirsutum
GhiAffx.6403.1.S1_s_at	DW500121.1	Ghi.5938	3.94515	0	gb:DW500121.1 dbest_id:35104549 /TID=GhiAffx.6403.1 /CNT=4 /FEA=EST /TIER=ConsEnd /STK=1 /NOTE=sequence(s) not in UniGene /REP_ORG=
Ghi.4039.1.A1_s_at	DR462360	Ghi.17747	3.94272	0	gb:DR462360 /DB_XREF=gi:84173712 /DB_XREF=CM107B04 /TID=Ghi.4039.1 /CNT=3 /FEA=EST /TIER=ConsEnd /STK=0 /UG=Ghi.4039 /UG_TITLE=Transcribed locus, moderately similar to NP_190894.1 PAL2; phenylalanine ammonia-lyase (Arabidopsis thaliana) /REP_ORG=G. hirsutum
GhiAffx.44139.1.S1_at	DW230734.1	Ghi.13378	3.9394	0	gb:DW230734.1 dbest_id:34834906 /TID=GhiAffx.44139.1 /CNT=3 /FEA=EST /TIER=ConsEnd /STK=0 /NOTE=sequence(s) not in UniGene /REP_ORG=
Ghi.5518.1.S1_x_at	DT047443	Ghi.16317	3.93814	0	gb:DT047443 /DB_XREF=gi:72270015 /DB_XREF=COT_CO_B02 /TID=Ghi.5518.1 /CNT=3 /FEA=EST /TIER=ConsEnd /STK=1 /UG=Ghi.5518 /UG_TITLE=Transcribed locus /REP_ORG=G. hirsutum
Ghi.4182.1.S1_at	DT456331	Ghi.4182	3.93765	0	gb:DT456331 /DB_XREF=gi:73847311 /DB_XREF=GH_ON14E08.f /CLONE=GH_ON14E08 /TID=Ghi.4182.1 /CNT=2 /FEA=EST /TIER=ConsEnd /STK=0 /UG=Ghi.4182 /UG_TITLE=Transcribed locus /REP_ORG=G. hirsutum
Ghi.5183.1.A1_at	DT048718	Ghi.5183	3.93655	0.0292223	gb:DT048718 /DB_XREF=gi:72272571 /DB_XREF=COT_DD_H06 /TID=Ghi.5183.1 /CNT=1 /FEA=EST /TIER=ConsEnd /STK=1 /UG=Ghi.5183 /UG_TITLE=Transcribed locus /REP_ORG=G. hirsutum
GhiAffx.13940.1.S1_at	DR458316	Ghi.19189	3.93539	0	gb:DR458316 /DB_XREF=gi:84169668 /DB_XREF=CM064E02 /TID=GhiAffx.13940.1 /CNT=2 /FEA=EST /TIER=ConsEnd /STK=0 /NOTE=sequence(s) not in UniGene /REP_ORG=G. hirsutum
GhiAffx.24618.1.S1_at	DW512016.1	---	3.93453	0	gb:DW512016.1 dbest_id:35117799 /TID=GhiAffx.24618.1 /CNT=2 /FEA=EST /TIER=ConsEnd /STK=1 /NOTE=sequence(s) not in UniGene /REP_ORG=
Ghi.4592.1.A1_x_at	DT049223	Ghi.7063	3.93316	0	gb:DT049223 /DB_XREF=gi:72273575 /DB_XREF=COT_DK_C07 /TID=Ghi.4592.1 /CNT=2 /FEA=EST /TIER=ConsEnd /STK=2 /UG=Ghi.4592 /UG_TITLE=Transcribed locus, moderately similar to NP_567078.1 TXR1 (THAXTOMIN A RESISTANT 1) (Arabidopsis thaliana) /REP_ORG=G. hirsutum
GraAffx.16191.1.S1_x_at	CO125023	---	3.92879	0	gb:CO125023 /DB_XREF=gi:48825294 /DB_XREF=GR__Eb08E16.r /CLONE=GR__Eb08E16 /TID=GraAffx.16191.1 /CNT=4 /FEA=EST /TIER=ConsEnd /STK=2 /NOTE=sequence(s) not in UniGene /REP_ORG=G. raimondii
GhiAffx.60468.1.S1_at	DW504503.1	Ghi.10041	3.92526	0	gb:DW504503.1 dbest_id:35108931 /TID=GhiAffx.60468.1 /CNT=3 /FEA=EST /TIER=ConsEnd /STK=1 /NOTE=sequence(s) not in UniGene /REP_ORG=
Ghi.3089.1.S1_at	DT465274	Ghi.3089	3.92177	0	gb:DT465274 /DB_XREF=gi:73862535 /DB_XREF=GH_CHX17B09.f /CLONE=GH_CHX17B09 /TID=Ghi.3089.1 /CNT=5 /FEA=EST /TIER=ConsEnd /STK=0 /UG=Ghi.3089 /UG_TITLE=Transcribed locus, weakly similar to NP_197831.3 ATP binding calcium ion binding calcium-dependent protein serinethreonine phosphatase kinase protein kinase protein serinethreonine kinase protein-tyrosine kinase (Arabidopsis thaliana) /REP_ORG=G. h…
GhiAffx.12897.2.S1_s_at	DW510695.1	Ghi.13705	3.9204	0	gb:DW510695.1 dbest_id:35116478 /TID=GhiAffx.12897.2 /CNT=6 /FEA=EST /TIER=ConsEnd /STK=1 /NOTE=sequence(s) not in UniGene /REP_ORG=
Ghi.2366.1.S1_at	DT465261	Ghi.2366	3.91995	0	gb:DT465261 /DB_XREF=gi:73862522 /DB_XREF=GH_CHX17A22.r /CLONE=GH_CHX17A22 /TID=Ghi.2366.1 /CNT=7 /FEA=EST /TIER=ConsEnd /STK=1 /UG=Ghi.2366 /UG_TITLE=Transcribed locus, weakly similar to NP_850399.1 calmodulin binding (Arabidopsis thaliana) /REP_ORG=G. hirsutum
Ghi.5892.3.S1_at	CO491599	Ghi.5892	3.91902	0	gb:CO491599 /DB_XREF=gi:54116090 /DB_XREF=G.h.fbr-sw00989 /TID=Ghi.5892.3 /CNT=1 /FEA=EST /TIER=ConsEnd /STK=0 /UG=Ghi.5892 /UG_TITLE=Transcribed locus, moderately similar to NP_196342.1 unknown protein (Arabidopsis thaliana) /REP_ORG=G. hirsutum
GhiAffx.63656.1.A1_at	DW239385.1	---	3.91602	0	gb:DW239385.1 dbest_id:34843551 /TID=GhiAffx.63656.1 /CNT=2 /FEA=EST /TIER=ConsEnd /STK=1 /NOTE=sequence(s) not in UniGene /REP_ORG=
GhiAffx.32507.1.S1_at	CO494420	Ghi.13961	3.91501	0	gb:CO494420 /DB_XREF=gi:54118911 /DB_XREF=G.h.fbr-sw03810 /TID=GhiAffx.32507.1 /CNT=7 /FEA=EST /TIER=ConsEnd /STK=0 /NOTE=sequence(s) not in UniGene /REP_ORG=G. hirsutum
GhiAffx.6771.1.A1_x_at	DW504469.1	---	3.91426	0	gb:DW504469.1 dbest_id:35108897 /TID=GhiAffx.6771.1 /CNT=2 /FEA=EST /TIER=ConsEnd /STK=1 /NOTE=sequence(s) not in UniGene /REP_ORG=
Ghi.10480.1.S1_at	DN758080	Ghi.10480	3.91351	0	gb:DN758080 /DB_XREF=gi:84143838 /DB_XREF=G.hir-stem 584 /TID=Ghi.10480.1 /CNT=7 /FEA=EST /TIER=ConsEnd /STK=0 /UG=Ghi.10480 /UG_TITLE=Transcribed locus, weakly similar to NP_189362.1 GTE8; DNA binding (Arabidopsis thaliana) /REP_ORG=G. hirsutum
GhiAffx.2120.1.A1_at	DT460318	---	3.91247	0	gb:DT460318 /DB_XREF=gi:73851298 /DB_XREF=GH_ON39B23.r /CLONE=GH_ON39B23 /TID=GhiAffx.2120.1 /CNT=2 /FEA=EST /TIER=ConsEnd /STK=1 /NOTE=sequence(s) not in UniGene /REP_ORG=G. hirsutum
Ghi.4495.1.A1_s_at	DT052116	Ghi.4495	3.91055	0	gb:DT052116 /DB_XREF=gi:72279604 /DB_XREF=COT_EU_B08 /TID=Ghi.4495.1 /CNT=3 /FEA=EST /TIER=ConsEnd /STK=1 /UG=Ghi.4495 /UG_TITLE=Transcribed locus, weakly similar to NP_192571.1 unknown protein (Arabidopsis thaliana) /REP_ORG=G. hirsutum
Ghi.3938.2.A1_at	DT463744	Ghi.3938	3.9098	0	gb:DT463744 /DB_XREF=gi:73861005 /DB_XREF=GH_CHX14A09.r /CLONE=GH_CHX14A09 /TID=Ghi.3938.2 /CNT=5 /FEA=EST /TIER=ConsEnd /STK=1 /UG=Ghi.3938 /UG_TITLE=Transcribed locus /REP_ORG=G. hirsutum
Gra.2917.1.S1_s_at	CO088370	Gra.2917	3.9086	0	gb:CO088370 /DB_XREF=gi:48779004 /DB_XREF=GR__Ea07E20.f /CLONE=GR__Ea07E20 /TID=Gra.2917.1 /CNT=5 /FEA=EST /TIER=ConsEnd /STK=0 /UG=Gra.2917 /UG_TITLE=Transcribed locus, moderately similar to NP_565218.1 MutTnudix family protein (Arabidopsis thaliana) /REP_ORG=G. raimondii
Ghi.4494.1.A1_at	DT052613	Ghi.4494	3.90182	0.0333442	gb:DT052613 /DB_XREF=gi:72280673 /DB_XREF=COT_FE_E04 /TID=Ghi.4494.1 /CNT=2 /FEA=EST /TIER=ConsEnd /STK=2 /UG=Ghi.4494 /UG_TITLE=Transcribed locus, weakly similar to XP_473482.1 OSJNBa0084K11.4 (Oryza sativa (japonica cultivar-group)) /REP_ORG=G. hirsutum
Ghi.6786.1.S1_at	CA993174	Ghi.6786	3.89829	0	gb:CA993174 /DB_XREF=gi:31072895 /DB_XREF=pAR05B12 /TID=Ghi.6786.1 /CNT=6 /FEA=EST /TIER=ConsEnd /STK=0 /UG=Ghi.6786 /UG_TITLE=Transcribed locus, moderately similar to NP_188102.1 ATP binding protein binding protein kinase protein serinethreonine kinase protein-tyrosine kinase (Arabidopsis thaliana) /REP_ORG=G. hirsutum
GhiAffx.27678.1.S1_at	DW503233.1	Ghi.14665	3.89704	0	gb:DW503233.1 dbest_id:35107661 /TID=GhiAffx.27678.1 /CNT=6 /FEA=EST /TIER=ConsEnd /STK=1 /NOTE=sequence(s) not in UniGene /REP_ORG=
GhiAffx.25581.1.S1_at	DW517059.1	Ghi.11195	3.89199	0	gb:DW517059.1 dbest_id:35122842 /TID=GhiAffx.25581.1 /CNT=3 /FEA=EST /TIER=ConsEnd /STK=1 /NOTE=sequence(s) not in UniGene /REP_ORG=
Ghi.3544.2.S1_at	DT464528	Ghi.18079	3.88898	0	gb:DT464528 /DB_XREF=gi:73861789 /DB_XREF=GH_CHX15M22.f /CLONE=GH_CHX15M22 /TID=Ghi.3544.2 /CNT=5 /FEA=EST /TIER=ConsEnd /STK=0 /UG=Ghi.3544 /UG_TITLE=Transcribed locus, moderately similar to NP_851016.1 unknown protein (Arabidopsis thaliana) /REP_ORG=G. hirsutum
GraAffx.32813.1.A1_s_at	CO090942	---	3.8867	0	gb:CO090942 /DB_XREF=gi:48789628 /DB_XREF=GR__Ea11C23.f /CLONE=GR__Ea11C23 /TID=GraAffx.32813.1 /CNT=3 /FEA=EST /TIER=ConsEnd /STK=1 /NOTE=sequence(s) not in UniGene /REP_ORG=G. raimondii
GhiAffx.23008.1.S1_at	DW503669.1	---	3.88551	0	gb:DW503669.1 dbest_id:35108097 /TID=GhiAffx.23008.1 /CNT=2 /FEA=EST /TIER=ConsEnd /STK=1 /NOTE=sequence(s) not in UniGene /REP_ORG=
Ghi.5703.1.A1_at	DT046682	Ghi.5703	3.88479	0	gb:DT046682 /DB_XREF=gi:72268274 /DB_XREF=COT_CB_B12 /TID=Ghi.5703.1 /CNT=1 /FEA=EST /TIER=ConsEnd /STK=1 /UG=Ghi.5703 /UG_TITLE=Transcribed locus, weakly similar to NP_181541.1 ATP binding kinase protein kinase protein serinethreonine kinase protein-tyrosine kinase (Arabidopsis thaliana) /REP_ORG=G. hirsutum
Ghi.4880.1.A1_at	DT050052	Ghi.4880	3.8834	0	gb:DT050052 /DB_XREF=gi:72275270 /DB_XREF=COT_DU_E03 /TID=Ghi.4880.1 /CNT=2 /FEA=EST /TIER=ConsEnd /STK=2 /UG=Ghi.4880 /UG_TITLE=Transcribed locus /REP_ORG=G. hirsutum
GhiAffx.32213.1.S1_s_at	DW520479.1	---	3.88129	0	gb:DW520479.1 dbest_id:35126262 /TID=GhiAffx.32213.1 /CNT=2 /FEA=EST /TIER=ConsEnd /STK=1 /NOTE=sequence(s) not in UniGene /REP_ORG=
Ghi.3173.1.S1_at	DT468807	Ghi.3173	3.88018	0	gb:DT468807 /DB_XREF=gi:73866069 /DB_XREF=GH_CHX22H17.r /CLONE=GH_CHX22H17 /TID=Ghi.3173.1 /CNT=6 /FEA=EST /TIER=ConsEnd /STK=1 /UG=Ghi.3173 /UG_TITLE=Transcribed locus, weakly similar to NP_974672.1 calmodulin binding (Arabidopsis thaliana) /REP_ORG=G. hirsutum
GhiAffx.42078.1.S1_at	DW506293.1	Ghi.1943	3.87966	0	gb:DW506293.1 dbest_id:35112076 /TID=GhiAffx.42078.1 /CNT=2 /FEA=EST /TIER=ConsEnd /STK=1 /NOTE=sequence(s) not in UniGene /REP_ORG=
GraAffx.10154.1.A1_at	CO094353	---	3.87829	0	gb:CO094353 /DB_XREF=gi:48793039 /DB_XREF=GR__Ea16G17.r /CLONE=GR__Ea16G17 /TID=GraAffx.10154.1 /CNT=5 /FEA=EST /TIER=ConsEnd /STK=1 /NOTE=sequence(s) not in UniGene /REP_ORG=G. raimondii
Ghi.7168.1.S1_s_at	AW187529	Ghi.7168	3.87811	0	gb:AW187529 /DB_XREF=gi:6461965 /DB_XREF=BNLGHi6939 /TID=Ghi.7168.1 /CNT=3 /FEA=EST /TIER=ConsEnd /STK=0 /UG=Ghi.7168 /UG_TITLE=Transcribed locus, weakly similar to NP_199593.2 FRA1 (FRAGILE FIBER 1); microtubule motor (Arabidopsis thaliana) /REP_ORG=G. hirsutum
GhiAffx.51984.1.S1_at	DW517154.1	Ghi.14130	3.87616	0	gb:DW517154.1 dbest_id:35122937 /TID=GhiAffx.51984.1 /CNT=3 /FEA=EST /TIER=ConsEnd /STK=0 /NOTE=sequence(s) not in UniGene /REP_ORG=
Ghi.3693.1.S1_at	DT462564	Ghi.3693	3.86867	0	gb:DT462564 /DB_XREF=gi:73859825 /DB_XREF=GH_CHX12E11.r /CLONE=GH_CHX12E11 /TID=Ghi.3693.1 /CNT=3 /FEA=EST /TIER=ConsEnd /STK=1 /UG=Ghi.3693 /UG_TITLE=Transcribed locus, weakly similar to NP_910062.1 hypothetical protein (Oryza sativa (japonica cultivar-group)) /REP_ORG=G. hirsutum
Ghi.6689.1.S1_at	DR463498	Ghi.6689	3.8653	0	gb:DR463498 /DB_XREF=gi:84174850 /DB_XREF=CM119B01 /TID=Ghi.6689.1 /CNT=2 /FEA=EST /TIER=ConsEnd /STK=0 /UG=Ghi.6689 /UG_TITLE=Transcribed locus /REP_ORG=G. hirsutum
GhiAffx.63064.1.S1_x_at	DW227897.1	Ghi.11024	3.8642	0	gb:DW227897.1 dbest_id:34832069 /TID=GhiAffx.63064.1 /CNT=3 /FEA=EST /TIER=ConsEnd /STK=0 /NOTE=sequence(s) not in UniGene /REP_ORG=
Ghi.9111.1.S1_at	DN761810	Ghi.9111	3.86299	0	gb:DN761810 /DB_XREF=gi:84147568 /DB_XREF=G.hir-stem 4317 /TID=Ghi.9111.1 /CNT=8 /FEA=EST /TIER=ConsEnd /STK=0 /UG=Ghi.9111 /UG_TITLE=Transcribed locus, moderately similar to NP_176196.1 ATPase, coupled to transmembrane movement of substances (Arabidopsis thaliana) /REP_ORG=G. hirsutum
Ghi.7578.1.S1_x_at	AI729242	Ghi.7578	3.86299	0	gb:AI729242 /DB_XREF=gi:5048094 /DB_XREF=BNLGHi12960 /TID=Ghi.7578.1 /CNT=3 /FEA=EST /TIER=ConsEnd /STK=0 /UG=Ghi.7578 /UG_TITLE=Transcribed locus, weakly similar to NP_568607.1 unknown protein (Arabidopsis thaliana) /REP_ORG=G. hirsutum
Ghi.8698.1.A1_s_at	DT051273	Ghi.8698	3.86203	0	gb:DT051273 /DB_XREF=gi:72277831 /DB_XREF=COT_EK_A10 /TID=Ghi.8698.1 /CNT=3 /FEA=EST /TIER=ConsEnd /STK=0 /UG=Ghi.8698 /UG_TITLE=Transcribed locus, strongly similar to NP_180198.1 GPA1 (G PROTEIN ALPHA SUBUNIT 1); signal transducer (Arabidopsis thaliana) /REP_ORG=G. hirsutum
GhiAffx.53154.1.S1_s_at	DW497978.1	Ghi.14506	3.86143	0	gb:DW497978.1 dbest_id:35102406 /TID=GhiAffx.53154.1 /CNT=5 /FEA=EST /TIER=ConsEnd /STK=1 /NOTE=sequence(s) not in UniGene /REP_ORG=
GraAffx.16056.1.S1_s_at	CO123007	---	3.85754	0	gb:CO123007 /DB_XREF=gi:48821694 /DB_XREF=GR__Eb04O18.r /CLONE=GR__Eb04O18 /TID=GraAffx.16056.1 /CNT=8 /FEA=EST /TIER=ConsEnd /STK=2 /NOTE=sequence(s) not in UniGene /REP_ORG=G. raimondii
GhiAffx.13112.1.S1_s_at	DW497901.1	Ghi.19865	3.85664	0	gb:DW497901.1 dbest_id:35102329 /TID=GhiAffx.13112.1 /CNT=4 /FEA=EST /TIER=ConsEnd /STK=1 /NOTE=sequence(s) not in UniGene /REP_ORG=
Ghi.4330.1.A1_at	DT054192	Ghi.4330	3.85582	0	gb:DT054192 /DB_XREF=gi:72283848 /DB_XREF=COT_CX_E06 /TID=Ghi.4330.1 /CNT=1 /FEA=EST /TIER=ConsEnd /STK=1 /UG=Ghi.4330 /UG_TITLE=Transcribed locus /REP_ORG=G. hirsutum
Ghi.8965.1.S1_at	AW187648	Ghi.8965	3.85555	0	gb:AW187648 /DB_XREF=gi:6462084 /DB_XREF=BNLGHi8744 /TID=Ghi.8965.1 /CNT=4 /FEA=EST /TIER=ConsEnd /STK=0 /UG=Ghi.8965 /UG_TITLE=Transcribed locus /REP_ORG=G. hirsutum
GraAffx.21117.1.S1_at	CO107844	---	3.85454	0	gb:CO107844 /DB_XREF=gi:48806530 /DB_XREF=GR__Eb0039E12.r /CLONE=GR__Eb0039E12 /TID=GraAffx.21117.1 /CNT=2 /FEA=EST /TIER=ConsEnd /STK=1 /NOTE=sequence(s) not in UniGene /REP_ORG=G. raimondii
GhiAffx.51928.1.S1_x_at	DW230490.1	Ghi.14105	3.85405	0	gb:DW230490.1 dbest_id:34834662 /TID=GhiAffx.51928.1 /CNT=3 /FEA=EST /TIER=ConsEnd /STK=0 /NOTE=sequence(s) not in UniGene /REP_ORG=
GhiAffx.16735.2.S1_s_at	DW230955.1	Ghi.13479	3.85325	0	gb:DW230955.1 dbest_id:34835127 /TID=GhiAffx.16735.2 /CNT=3 /FEA=EST /TIER=ConsEnd /STK=0 /NOTE=sequence(s) not in UniGene /REP_ORG=
Ghi.2995.2.A1_at	DT466217	Ghi.2995	3.85313	0	gb:DT466217 /DB_XREF=gi:73863478 /DB_XREF=GH_CHX18J02.r /CLONE=GH_CHX18J02 /TID=Ghi.2995.2 /CNT=3 /FEA=EST /TIER=ConsEnd /STK=1 /UG=Ghi.2995 /UG_TITLE=Transcribed locus, weakly similar to NP_199763.1 WRKY48; transcription factor (Arabidopsis thaliana) /REP_ORG=G. hirsutum
Ghi.9629.1.S1_s_at	DT048688	Ghi.9629	3.8521	0	gb:DT048688 /DB_XREF=gi:72272512 /DB_XREF=COT_DD_E08 /TID=Ghi.9629.1 /CNT=8 /FEA=EST /TIER=ConsEnd /STK=1 /UG=Ghi.9629 /UG_TITLE=Transcribed locus /REP_ORG=G. hirsutum
GhiAffx.44076.1.A1_at	DW516829.1	---	3.85186	0	gb:DW516829.1 dbest_id:35122612 /TID=GhiAffx.44076.1 /CNT=2 /FEA=EST /TIER=ConsEnd /STK=1 /NOTE=sequence(s) not in UniGene /REP_ORG=
Ghi.4275.1.S1_at	DT455944	Ghi.4275	3.84654	0	gb:DT455944 /DB_XREF=gi:73846924 /DB_XREF=GH_ON05F09.f /CLONE=GH_ON05F09 /TID=Ghi.4275.1 /CNT=3 /FEA=EST /TIER=ConsEnd /STK=0 /UG=Ghi.4275 /UG_TITLE=Transcribed locus, strongly similar to NP_187892.2 unknown protein (Arabidopsis thaliana) /REP_ORG=G. hirsutum
Ghi.2847.4.A1_s_at	DT462511	Ghi.2847	3.84646	0	gb:DT462511 /DB_XREF=gi:73859772 /DB_XREF=GH_CHX12D05.r /CLONE=GH_CHX12D05 /TID=Ghi.2847.4 /CNT=4 /FEA=EST /TIER=ConsEnd /STK=2 /UG=Ghi.2847 /UG_TITLE=Transcribed locus, moderately similar to NP_191010.1 ATEP3; chitinase (Arabidopsis thaliana) /REP_ORG=G. hirsutum
GhiAffx.22562.1.A1_at	DW238476.1	Ghi.13380	3.84587	0	gb:DW238476.1 dbest_id:34842642 /TID=GhiAffx.22562.1 /CNT=4 /FEA=EST /TIER=ConsEnd /STK=0 /NOTE=sequence(s) not in UniGene /REP_ORG=
Ghi.9312.2.S1_x_at	DT456088	Ghi.9312	3.84419	0	gb:DT456088 /DB_XREF=gi:73847068 /DB_XREF=GH_ON11E11.f /CLONE=GH_ON11E11 /TID=Ghi.9312.2 /CNT=3 /FEA=EST /TIER=ConsEnd /STK=0 /UG=Ghi.9312 /UG_TITLE=Transcribed locus, moderately similar to NP_197201.1 oxidoreductase zinc ion binding (Arabidopsis thaliana) /REP_ORG=G. hirsutum
Ghi.3738.1.A1_at	DT462132	Ghi.3738	3.84419	0	gb:DT462132 /DB_XREF=gi:73859393 /DB_XREF=GH_CHX09A12.x /CLONE=GH_CHX09A12 /TID=Ghi.3738.1 /CNT=1 /FEA=EST /TIER=ConsEnd /STK=0 /UG=Ghi.3738 /UG_TITLE=Transcribed locus, moderately similar to NP_180403.1 unknown protein (Arabidopsis thaliana) /REP_ORG=G. hirsutum
Ghi.5448.1.A1_at	DT047704	Ghi.5448	3.84287	0	gb:DT047704 /DB_XREF=gi:72270540 /DB_XREF=COT_CR_C07 /TID=Ghi.5448.1 /CNT=2 /FEA=EST /TIER=ConsEnd /STK=1 /UG=Ghi.5448 /UG_TITLE=Transcribed locus, weakly similar to NP_197637.1 unknown protein (Arabidopsis thaliana) /REP_ORG=G. hirsutum
Ghi.3962.1.A1_s_at	DN801267	Ghi.3962	3.83911	0	gb:DN801267 /DB_XREF=gi:84151912 /DB_XREF=G.hir-15-20 DAA bolls drought stressed 422 /TID=Ghi.3962.1 /CNT=4 /FEA=EST /TIER=ConsEnd /STK=0 /UG=Ghi.3962 /UG_TITLE=Transcribed locus, moderately similar to NP_200205.1 unknown protein (Arabidopsis thaliana) /REP_ORG=G. hirsutum
GhiAffx.10480.1.A1_s_at	DW517422.1	Ghi.683	3.83412	0	gb:DW517422.1 dbest_id:35123205 /TID=GhiAffx.10480.1 /CNT=2 /FEA=EST /TIER=ConsEnd /STK=1 /NOTE=sequence(s) not in UniGene /REP_ORG=
Gra.183.2.S1_s_at	CO089945	Gra.183	3.83208	0	gb:CO089945 /DB_XREF=gi:48782759 /DB_XREF=GR__Ea09K16.r /CLONE=GR__Ea09K16 /TID=Gra.183.2 /CNT=2 /FEA=EST /TIER=ConsEnd /STK=1 /UG=Gra.183 /UG_TITLE=Transcribed locus, moderately similar to NP_189021.2 AMP-binding protein, putative (Arabidopsis thaliana) /REP_ORG=G. raimondii
Ghi.5420.1.S1_s_at	DT047803	Ghi.5420	3.82983	0.0292223	gb:DT047803 /DB_XREF=gi:72270737 /DB_XREF=COT_CS_E08 /TID=Ghi.5420.1 /CNT=7 /FEA=EST /TIER=ConsEnd /STK=1 /UG=Ghi.5420 /UG_TITLE=Transcribed locus, weakly similar to XP_469334.1 putative glutamine synthetase (Oryza sativa) /REP_ORG=G. hirsutum
Ghi.6088.2.A1_s_at	DV849489	Ghi.6088	3.82759	0	gb:DV849489 /DB_XREF=gi:82755927 /DB_XREF=GH_LSL21B04.f /CLONE=GH_LSL21B04 /TID=Ghi.6088.2 /CNT=4 /FEA=EST /TIER=ConsEnd /STK=0 /UG=Ghi.6088 /UG_TITLE=Transcribed locus, strongly similar to NP_190150.1 ATMPK3 (MITOGEN-ACTIVATED PROTEIN KINASE 3); MAP kinase kinase protein kinase (Arabidopsis thaliana) /REP_ORG=G. hirsutum
GraAffx.15661.2.S1_at	CO124127	---	3.82657	0	gb:CO124127 /DB_XREF=gi:48822814 /DB_XREF=GR__Eb06N03.r /CLONE=GR__Eb06N03 /TID=GraAffx.15661.2 /CNT=5 /FEA=EST /TIER=ConsEnd /STK=1 /NOTE=sequence(s) not in UniGene /REP_ORG=G. raimondii
Ghi.5154.1.A1_s_at	DT048034	Ghi.5154	3.82551	0	gb:DT048034 /DB_XREF=gi:72271195 /DB_XREF=COT_CV_E04 /TID=Ghi.5154.1 /CNT=2 /FEA=EST /TIER=ConsEnd /STK=0 /UG=Ghi.5154 /UG_TITLE=Transcribed locus, weakly similar to NP_188505.1 WNK6; kinase (Arabidopsis thaliana) /REP_ORG=G. hirsutum
GraAffx.16239.1.S1_at	CO122457	---	3.82335	0	gb:CO122457 /DB_XREF=gi:48821144 /DB_XREF=GR__Eb04B14.r /CLONE=GR__Eb04B14 /TID=GraAffx.16239.1 /CNT=2 /FEA=EST /TIER=ConsEnd /STK=1 /NOTE=sequence(s) not in UniGene /REP_ORG=G. raimondii
Ghi.5736.1.A1_s_at	DT046458	Ghi.16456	3.81849	0	gb:DT046458 /DB_XREF=gi:72267820 /DB_XREF=COT_AB_B02 /TID=Ghi.5736.1 /CNT=1 /FEA=EST /TIER=ConsEnd /STK=1 /UG=Ghi.5736 /UG_TITLE=Transcribed locus /REP_ORG=G. hirsutum
Ghi.6194.2.S1_at	DR462804	---	3.81799	0	gb:DR462804 /DB_XREF=gi:84174156 /DB_XREF=CM111G06 /TID=Ghi.6194.2 /CNT=1 /FEA=EST /TIER=ConsEnd /STK=0 /UG=Ghi.6194 /UG_TITLE=Transcribed locus, weakly similar to NP_175390.2 oxidoreductase zinc ion binding (Arabidopsis thaliana) /REP_ORG=G. hirsutum
Ghi.4405.1.A1_at	DR455938	Ghi.4405	3.81578	0	gb:DR455938 /DB_XREF=gi:84167290 /DB_XREF=CM039E05 /TID=Ghi.4405.1 /CNT=2 /FEA=EST /TIER=ConsEnd /STK=0 /UG=Ghi.4405 /UG_TITLE=Transcribed locus, moderately similar to NP_566508.1 ATCOX17 (Arabidopsis thaliana) /REP_ORG=G. hirsutum
Ghi.54.1.S1_at	DR463969	Ghi.54	3.81495	0	gb:DR463969 /DB_XREF=gi:84175321 /DB_XREF=CM124A08 /TID=Ghi.54.1 /CNT=1 /FEA=EST /TIER=ConsEnd /STK=0 /UG=Ghi.54 /UG_TITLE=Transcribed locus, weakly similar to NP_197006.1 unknown protein (Arabidopsis thaliana) /REP_ORG=G. hirsutum
GhiAffx.25788.1.A1_at	DW518281.1	---	3.81413	0	gb:DW518281.1 dbest_id:35124064 /TID=GhiAffx.25788.1 /CNT=2 /FEA=EST /TIER=ConsEnd /STK=1 /NOTE=sequence(s) not in UniGene /REP_ORG=
Ghi.6890.1.S1_s_at	CA992747	---	3.81388	0	gb:CA992747 /DB_XREF=gi:31072468 /DB_XREF=pAR0149 /TID=Ghi.6890.1 /CNT=3 /FEA=EST /TIER=ConsEnd /STK=0 /UG=Ghi.6890 /UG_TITLE=Transcribed locus, weakly similar to NP_196965.2 ATP binding ATP-dependent helicase helicase nucleic acid binding (Arabidopsis thaliana) /REP_ORG=G. hirsutum
GhiAffx.1817.1.S1_at	DW497307.1	Ghi.13487	3.81267	0	gb:DW497307.1 dbest_id:35101735 /TID=GhiAffx.1817.1 /CNT=3 /FEA=EST /TIER=ConsEnd /STK=1 /NOTE=sequence(s) not in UniGene /REP_ORG=
GhiAffx.58552.1.A1_s_at	DW237410.1	Ghi.17868	3.81262	0	gb:DW237410.1 dbest_id:34841576 /TID=GhiAffx.58552.1 /CNT=2 /FEA=EST /TIER=ConsEnd /STK=1 /NOTE=sequence(s) not in UniGene /REP_ORG=
Ghi.8836.1.S1_at	DT456105	Ghi.8836	3.81165	0	gb:DT456105 /DB_XREF=gi:73847085 /DB_XREF=GH_ON11G07.f /CLONE=GH_ON11G07 /TID=Ghi.8836.1 /CNT=3 /FEA=EST /TIER=ConsEnd /STK=0 /UG=Ghi.8836 /UG_TITLE=Transcribed locus /REP_ORG=G. hirsutum
GhiAffx.14933.1.S1_at	DW244854.1	Ghi.16246	3.81054	0	gb:DW244854.1 dbest_id:34849020 /TID=GhiAffx.14933.1 /CNT=5 /FEA=EST /TIER=ConsEnd /STK=0 /NOTE=sequence(s) not in UniGene /REP_ORG=
GhiAffx.6422.1.S1_at	DW500273.1	---	3.80964	0	gb:DW500273.1 dbest_id:35104701 /TID=GhiAffx.6422.1 /CNT=2 /FEA=EST /TIER=ConsEnd /STK=1 /NOTE=sequence(s) not in UniGene /REP_ORG=
Gra.1909.1.S1_s_at	CO101365	Gra.1909	3.8079	0	gb:CO101365 /DB_XREF=gi:48800051 /DB_XREF=GR__Eb0027K11.f /CLONE=GR__Eb0027K11 /TID=Gra.1909.1 /CNT=1 /FEA=EST /TIER=ConsEnd /STK=0 /UG=Gra.1909 /UG_TITLE=Transcribed locus, weakly similar to XP_467603.1 putative homeodomain leucine zipper protein (Oryza sativa (japonica cultivar-group)) /REP_ORG=G. raimondii
GhiAffx.1868.1.S1_a_at	DW510017.1	Ghi.13526	3.80566	0	gb:DW510017.1 dbest_id:35115800 /TID=GhiAffx.1868.1 /CNT=6 /FEA=EST /TIER=ConsEnd /STK=0 /NOTE=sequence(s) not in UniGene /REP_ORG=
GhiAffx.11121.2.A1_at	DW234863.1	Ghi.16625	3.80556	0	gb:DW234863.1 dbest_id:34839029 /TID=GhiAffx.11121.2 /CNT=2 /FEA=EST /TIER=ConsEnd /STK=1 /NOTE=sequence(s) not in UniGene /REP_ORG=
GraAffx.28264.1.A1_s_at	CO091105	---	3.80517	0	gb:CO091105 /DB_XREF=gi:48789791 /DB_XREF=GR__Ea11G21.r /CLONE=GR__Ea11G21 /TID=GraAffx.28264.1 /CNT=4 /FEA=EST /TIER=ConsEnd /STK=0 /NOTE=sequence(s) not in UniGene /REP_ORG=G. raimondii
Ghi.3870.1.A1_at	DT457699	Ghi.3870	3.80348	0	gb:DT457699 /DB_XREF=gi:73848679 /DB_XREF=GH_ON34P06.f /CLONE=GH_ON34P06 /TID=Ghi.3870.1 /CNT=5 /FEA=EST /TIER=ConsEnd /STK=1 /UG=Ghi.3870 /UG_TITLE=Transcribed locus, weakly similar to NP_174475.1 guanyl nucleotide binding signal transducer (Arabidopsis thaliana) /REP_ORG=G. hirsutum
GhiAffx.48147.1.S1_at	DW496325.1	Ghi.14543	3.80229	0	gb:DW496325.1 dbest_id:35100753 /TID=GhiAffx.48147.1 /CNT=4 /FEA=EST /TIER=ConsEnd /STK=0 /NOTE=sequence(s) not in UniGene /REP_ORG=
GhiAffx.60579.1.A1_at	DW505078.1	---	3.80017	0	gb:DW505078.1 dbest_id:35110861 /TID=GhiAffx.60579.1 /CNT=2 /FEA=EST /TIER=ConsEnd /STK=1 /NOTE=sequence(s) not in UniGene /REP_ORG=
Ghi.9151.2.S1_at	DT049218	Ghi.19266	3.80008	0	gb:DT049218 /DB_XREF=gi:72273565 /DB_XREF=COT_DK_C01 /TID=Ghi.9151.2 /CNT=1 /FEA=EST /TIER=ConsEnd /STK=1 /UG=Ghi.9151 /UG_TITLE=Transcribed locus, moderately similar to NP_199602.1 RBOHD (RESPIRATORY BURST OXIDASE PROTEIN D) (Arabidopsis thaliana) /REP_ORG=G. hirsutum
Ghi.6299.1.A1_at	DT047846	Ghi.17559	3.79517	0	gb:DT047846 /DB_XREF=gi:72270821 /DB_XREF=COT_CT_A08 /TID=Ghi.6299.1 /CNT=2 /FEA=EST /TIER=ConsEnd /STK=1 /UG=Ghi.6299 /UG_TITLE=Transcribed locus, weakly similar to NP_172960.2 unknown protein (Arabidopsis thaliana) /REP_ORG=G. hirsutum
Ghi.4643.1.A1_s_at	DT047482	Ghi.4643	3.79501	0	gb:DT047482 /DB_XREF=gi:72270093 /DB_XREF=COT_CO_E09 /TID=Ghi.4643.1 /CNT=6 /FEA=EST /TIER=ConsEnd /STK=3 /UG=Ghi.4643 /UG_TITLE=Transcribed locus, weakly similar to NP_177672.2 DNA binding transcription factor (Arabidopsis thaliana) /REP_ORG=G. hirsutum
Ghi.3149.1.A1_at	DT469017	Ghi.3149	3.79411	0	gb:DT469017 /DB_XREF=gi:73866279 /DB_XREF=GH_CHX22N02.r /CLONE=GH_CHX22N02 /TID=Ghi.3149.1 /CNT=2 /FEA=EST /TIER=ConsEnd /STK=2 /UG=Ghi.3149 /UG_TITLE=Transcribed locus, moderately similar to NP_566246.1 nucleotide binding (Arabidopsis thaliana) /REP_ORG=G. hirsutum
GhiAffx.1589.7.S1_at	DW512953.1	Ghi.18525	3.79378	0	gb:DW512953.1 dbest_id:35118736 /TID=GhiAffx.1589.7 /CNT=3 /FEA=EST /TIER=ConsEnd /STK=1 /NOTE=sequence(s) not in UniGene /REP_ORG=
Ghi.6108.1.S1_s_at	DT464542	Ghi.8483	3.79069	0	gb:DT464542 /DB_XREF=gi:73861803 /DB_XREF=GH_CHX15N06.r /CLONE=GH_CHX15N06 /TID=Ghi.6108.1 /CNT=3 /FEA=EST /TIER=ConsEnd /STK=1 /UG=Ghi.6108 /UG_TITLE=Transcribed locus, weakly similar to NP_180627.1 unknown protein (Arabidopsis thaliana) /REP_ORG=G. hirsutum
Ghi.6206.1.S1_at	DV849935	Ghi.6206	3.78849	0	gb:DV849935 /DB_XREF=gi:82756373 /DB_XREF=GH_LSL26B11.f /CLONE=GH_LSL26B11 /TID=Ghi.6206.1 /CNT=1 /FEA=EST /TIER=ConsEnd /STK=0 /UG=Ghi.6206 /UG_TITLE=Transcribed locus, moderately similar to NP_849487.1 unknown protein (Arabidopsis thaliana) /REP_ORG=G. hirsutum
GhiAffx.16082.1.S1_at	DW227180.1	Ghi.16109	3.78761	0	gb:DW227180.1 dbest_id:34831352 /TID=GhiAffx.16082.1 /CNT=3 /FEA=EST /TIER=ConsEnd /STK=3 /NOTE=sequence(s) not in UniGene /REP_ORG=
Ghi.8046.1.S1_at	U53702.1	Ghi.8046	3.78308	0	gb:U53702.1 /DB_XREF=gi:1297360 /TID=Ghi.8046.1 /CNT=1 /FEA=mRNA /TIER=ConsEnd /STK=0 /UG=Ghi.8046 /UG_TITLE=Gossypium hirsutum alcohol dehydrogenase 1 /DEF=Gossypium hirsutum alcohol dehydrogenase 1 mRNA, partial cds. /REP_ORG=G. hirsutum
Ghi.3157.1.A1_at	DT468946	Ghi.3157	3.78263	0	gb:DT468946 /DB_XREF=gi:73866208 /DB_XREF=GH_CHX22L08.r /CLONE=GH_CHX22L08 /TID=Ghi.3157.1 /CNT=1 /FEA=EST /TIER=ConsEnd /STK=1 /UG=Ghi.3157 /UG_TITLE=Transcribed locus, weakly similar to NP_179190.2 unknown protein (Arabidopsis thaliana) /REP_ORG=G. hirsutum
Ghi.3367.1.A1_s_at	DT462190	Ghi.3367	3.78123	0	gb:DT462190 /DB_XREF=gi:73859451 /DB_XREF=GH_CHX09G07.x /CLONE=GH_CHX09G07 /TID=Ghi.3367.1 /CNT=2 /FEA=EST /TIER=ConsEnd /STK=0 /UG=Ghi.3367 /UG_TITLE=Transcribed locus, weakly similar to NP_173958.1 B5 no. 6 (Arabidopsis thaliana) /REP_ORG=G. hirsutum
Ghi.2230.4.S1_at	DT465688	Ghi.4918	3.7805	0	gb:DT465688 /DB_XREF=gi:73862949 /DB_XREF=GH_CHX17M11.r /CLONE=GH_CHX17M11 /TID=Ghi.2230.4 /CNT=2 /FEA=EST /TIER=ConsEnd /STK=0 /UG=Ghi.2230 /UG_TITLE=Transcribed locus, weakly similar to NP_199927.1 RNA binding pseudouridine synthase pseudouridylate synthase (Arabidopsis thaliana) /REP_ORG=G. hirsutum
GhiAffx.28839.2.S1_at	DW517819.1	Ghi.11191	3.77804	0	gb:DW517819.1 dbest_id:35123602 /TID=GhiAffx.28839.2 /CNT=4 /FEA=EST /TIER=ConsEnd /STK=0 /NOTE=sequence(s) not in UniGene /REP_ORG=
GhiAffx.3411.1.A1_at	DW497356.1	Ghi.11868	3.77646	0.0627412	gb:DW497356.1 dbest_id:35101784 /TID=GhiAffx.3411.1 /CNT=3 /FEA=EST /TIER=ConsEnd /STK=2 /NOTE=sequence(s) not in UniGene /REP_ORG=
Ghi.1114.1.S1_s_at	DN817396	Ghi.1114	3.77417	0	gb:DN817396 /DB_XREF=gi:84156170 /DB_XREF=G.hir-seedling 596 /TID=Ghi.1114.1 /CNT=1 /FEA=EST /TIER=ConsEnd /STK=1 /UG=Ghi.1114 /UG_TITLE=Transcribed locus, moderately similar to NP_568568.1 calcium ion binding (Arabidopsis thaliana) /REP_ORG=G. hirsutum
Ghi.8496.1.A1_at	DV849555	Ghi.8496	3.7679	0	gb:DV849555 /DB_XREF=gi:82755993 /DB_XREF=GH_LSL21H03.f /CLONE=GH_LSL21H03 /TID=Ghi.8496.1 /CNT=12 /FEA=EST /TIER=ConsEnd /STK=0 /UG=Ghi.8496 /UG_TITLE=Transcribed locus, weakly similar to NP_974279.1 unknown protein (Arabidopsis thaliana) /REP_ORG=G. hirsutum
Ghi.9169.1.S1_s_at	DT463346	Ghi.9169	3.76663	0.0333442	gb:DT463346 /DB_XREF=gi:73860607 /DB_XREF=GH_CHX13G18.r /CLONE=GH_CHX13G18 /TID=Ghi.9169.1 /CNT=4 /FEA=EST /TIER=ConsEnd /STK=2 /UG=Ghi.9169 /UG_TITLE=Transcribed locus /REP_ORG=G. hirsutum
GhiAffx.13724.1.A1_at	DT049856	---	3.76324	0	gb:DT049856 /DB_XREF=gi:72274837 /DB_XREF=COT_DS_B02 /TID=GhiAffx.13724.1 /CNT=2 /FEA=EST /TIER=ConsEnd /STK=1 /NOTE=sequence(s) not in UniGene /REP_ORG=G. hirsutum
Gra.1951.2.A1_s_at	CO126446	---	3.76013	0	gb:CO126446 /DB_XREF=gi:48828056 /DB_XREF=GR__Eb10H16.r /CLONE=GR__Eb10H16 /TID=Gra.1951.2 /CNT=1 /FEA=EST /TIER=ConsEnd /STK=1 /UG=Gra.1951 /UG_TITLE=Transcribed locus, moderately similar to NP_196588.2 Ras-related GTP-binding protein, putative (Arabidopsis thaliana) /REP_ORG=G. raimondii
GraAffx.8654.1.S1_s_at	CO089582	---	3.75612	0.00854976	gb:CO089582 /DB_XREF=gi:48780216 /DB_XREF=GR__Ea09C05.f /CLONE=GR__Ea09C05 /TID=GraAffx.8654.1 /CNT=2 /FEA=EST /TIER=ConsEnd /STK=1 /NOTE=sequence(s) not in UniGene /REP_ORG=G. raimondii
GhiAffx.16634.1.A1_s_at	DW230122.1	Ghi.16123	3.75442	0	gb:DW230122.1 dbest_id:34834294 /TID=GhiAffx.16634.1 /CNT=3 /FEA=EST /TIER=ConsEnd /STK=2 /NOTE=sequence(s) not in UniGene /REP_ORG=
Ghi.3913.1.S1_at	DT455621	Ghi.3913	3.74802	0	gb:DT455621 /DB_XREF=gi:73846601 /DB_XREF=GH_ON01D12.f /CLONE=GH_ON01D12 /TID=Ghi.3913.1 /CNT=3 /FEA=EST /TIER=ConsEnd /STK=0 /UG=Ghi.3913 /UG_TITLE=Transcribed locus, weakly similar to NP_177931.1 RAP2.4; DNA binding transcription factor (Arabidopsis thaliana) /REP_ORG=G. hirsutum
Gra.2092.2.S1_s_at	CO121266	Gra.2092	3.74787	0	gb:CO121266 /DB_XREF=gi:48819953 /DB_XREF=GR__Eb02G01.r /CLONE=GR__Eb02G01 /TID=Gra.2092.2 /CNT=5 /FEA=EST /TIER=ConsEnd /STK=1 /UG=Gra.2092 /UG_TITLE=Transcribed locus, moderately similar to NP_177948.3 dehydration-responsive protein-related (Arabidopsis thaliana) /REP_ORG=G. raimondii
Ghi.549.1.A1_at	DR457954	Ghi.651	3.74726	0	gb:DR457954 /DB_XREF=gi:84169306 /DB_XREF=CM060F08 /TID=Ghi.549.1 /CNT=1 /FEA=EST /TIER=ConsEnd /STK=0 /UG=Ghi.549 /UG_TITLE=Transcribed locus, weakly similar to NP_564265.1 unknown protein (Arabidopsis thaliana) /REP_ORG=G. hirsutum
GhiAffx.7140.1.S1_a_at	DW237917.1	Ghi.15756	3.74722	0	gb:DW237917.1 dbest_id:34842083 /TID=GhiAffx.7140.1 /CNT=7 /FEA=EST /TIER=ConsEnd /STK=1 /NOTE=sequence(s) not in UniGene /REP_ORG=
GhiAffx.59753.1.S1_at	DW500958.1	---	3.7458	0	gb:DW500958.1 dbest_id:35105386 /TID=GhiAffx.59753.1 /CNT=2 /FEA=EST /TIER=ConsEnd /STK=0 /NOTE=sequence(s) not in UniGene /REP_ORG=
Ghi.8796.1.S1_at	DT455752	Ghi.8796	3.74232	0	gb:DT455752 /DB_XREF=gi:73846732 /DB_XREF=GH_ON03A11.f /CLONE=GH_ON03A11 /TID=Ghi.8796.1 /CNT=3 /FEA=EST /TIER=ConsEnd /STK=0 /UG=Ghi.8796 /UG_TITLE=Transcribed locus /REP_ORG=G. hirsutum
Gra.2709.1.S1_at	CO088911	Gra.3660	3.74185	0	gb:CO088911 /DB_XREF=gi:48779545 /DB_XREF=GR__Ea08C03.r /CLONE=GR__Ea08C03 /TID=Gra.2709.1 /CNT=2 /FEA=EST /TIER=ConsEnd /STK=1 /UG=Gra.2709 /UG_TITLE=Transcribed locus, weakly similar to NP_194922.1 cytochrome P450, putative (Arabidopsis thaliana) /REP_ORG=G. raimondii
Ghi.7539.1.S1_at	DR454677	Ghi.7539	3.74002	0	gb:DR454677 /DB_XREF=gi:84166029 /DB_XREF=CM026C08 /TID=Ghi.7539.1 /CNT=7 /FEA=EST /TIER=ConsEnd /STK=0 /UG=Ghi.7539 /UG_TITLE=Transcribed locus, moderately similar to NP_567249.1 RNA binding nucleic acid binding (Arabidopsis thaliana) /REP_ORG=G. hirsutum
GhiAffx.53214.1.S1_at	DW509483.1	Ghi.15771	3.73552	0	gb:DW509483.1 dbest_id:35115266 /TID=GhiAffx.53214.1 /CNT=3 /FEA=EST /TIER=ConsEnd /STK=1 /NOTE=sequence(s) not in UniGene /REP_ORG=
GraAffx.959.1.A1_s_at	CO128043	---	3.7338	0	gb:CO128043 /DB_XREF=gi:48829653 /DB_XREF=GR__Eb12O18.r /CLONE=GR__Eb12O18 /TID=GraAffx.959.1 /CNT=1 /FEA=EST /TIER=ConsEnd /STK=1 /NOTE=sequence(s) not in UniGene /REP_ORG=G. raimondii
Ghi.10613.1.S1_at	DT466039	Ghi.10613	3.72755	0.0366566	gb:DT466039 /DB_XREF=gi:73863300 /DB_XREF=GH_CHX18E24.r /CLONE=GH_CHX18E24 /TID=Ghi.10613.1 /CNT=13 /FEA=EST /TIER=ConsEnd /STK=0 /UG=Ghi.10613 /UG_TITLE=Transcribed locus, strongly similar to NP_196177.1 FAD8 (FATTY ACID DESATURASE 8); omega-3 fatty acid desaturase (Arabidopsis thaliana) /REP_ORG=G. hirsutum
GraAffx.11904.1.A1_at	CO073468	---	3.7224	0	gb:CO073468 /DB_XREF=gi:48742949 /DB_XREF=GR__Ea33B23.r /CLONE=GR__Ea33B23 /TID=GraAffx.11904.1 /CNT=2 /FEA=EST /TIER=ConsEnd /STK=1 /NOTE=sequence(s) not in UniGene /REP_ORG=G. raimondii
Ghi.4011.1.A1_s_at	DN800664	Ghi.4011	3.71441	0	gb:DN800664 /DB_XREF=gi:84151309 /DB_XREF=G.hir-drought stressed seedling 579 /TID=Ghi.4011.1 /CNT=6 /FEA=EST /TIER=ConsEnd /STK=0 /UG=Ghi.4011 /UG_TITLE=Transcribed locus /REP_ORG=G. hirsutum
GhiAffx.130.1.A1_at	DT463794	Ghi.3540	3.71407	0	gb:DT463794 /DB_XREF=gi:73861055 /DB_XREF=GH_CHX14C13.r /CLONE=GH_CHX14C13 /TID=GhiAffx.130.1 /CNT=2 /FEA=EST /TIER=ConsEnd /STK=1 /NOTE=sequence(s) not in UniGene /REP_ORG=G. hirsutum
GhiAffx.24015.1.A1_at	DW509082.1	---	3.71267	0	gb:DW509082.1 dbest_id:35114865 /TID=GhiAffx.24015.1 /CNT=2 /FEA=EST /TIER=ConsEnd /STK=1 /NOTE=sequence(s) not in UniGene /REP_ORG=
Ghi.10388.3.S1_at	CA993635	Ghi.10388	3.71232	0	gb:CA993635 /DB_XREF=gi:31073356 /DB_XREF=pAR09A01 /TID=Ghi.10388.3 /CNT=1 /FEA=EST /TIER=ConsEnd /STK=0 /UG=Ghi.10388 /UG_TITLE=Transcribed locus, moderately similar to NP_194825.1 CIPK6 (CBL-INTERACTING PROTEIN KINASE 6); ATP binding kinase protein kinase protein serinethreonine kinase protein-tyrosine kinase (Arabidopsis thaliana) /REP_ORG=G. hirsutum
GraAffx.14889.1.S1_at	CO126399	---	3.71095	0	gb:CO126399 /DB_XREF=gi:48828009 /DB_XREF=GR__Eb10G12.r /CLONE=GR__Eb10G12 /TID=GraAffx.14889.1 /CNT=2 /FEA=EST /TIER=ConsEnd /STK=1 /NOTE=sequence(s) not in UniGene /REP_ORG=G. raimondii
GhiAffx.33946.1.S1_at	DW506962.1	Ghi.3339	3.71018	0	gb:DW506962.1 dbest_id:35112745 /TID=GhiAffx.33946.1 /CNT=2 /FEA=EST /TIER=ConsEnd /STK=1 /NOTE=sequence(s) not in UniGene /REP_ORG=
Ghi.193.1.S1_at	DR461889	Ghi.193	3.70179	0	gb:DR461889 /DB_XREF=gi:84173241 /DB_XREF=CM102B11 /TID=Ghi.193.1 /CNT=1 /FEA=EST /TIER=ConsEnd /STK=0 /UG=Ghi.193 /UG_TITLE=Transcribed locus, weakly similar to XP_467907.1 unknown protein (Oryza sativa (japonica cultivar-group)) /REP_ORG=G. hirsutum
GraAffx.12507.1.S1_at	CO070367	---	3.70074	0	gb:CO070367 /DB_XREF=gi:48739848 /DB_XREF=GR__Ea27F23.r /CLONE=GR__Ea27F23 /TID=GraAffx.12507.1 /CNT=4 /FEA=EST /TIER=ConsEnd /STK=1 /NOTE=sequence(s) not in UniGene /REP_ORG=G. raimondii
GhiAffx.61605.1.S1_s_at	DN800946	Ghi.16587	3.69992	0	gb:DN800946 /DB_XREF=gi:84151591 /DB_XREF=G.hir-15-20 DAA bolls drought stressed 101 /TID=GhiAffx.61605.1 /CNT=6 /FEA=EST /TIER=ConsEnd /STK=0 /NOTE=sequence(s) not in UniGene /REP_ORG=G. hirsutum
Ghi.4209.1.A1_x_at	DT456804	Ghi.4209	3.69908	0	gb:DT456804 /DB_XREF=gi:73847784 /DB_XREF=GH_ON33H17.r /CLONE=GH_ON33H17 /TID=Ghi.4209.1 /CNT=3 /FEA=EST /TIER=ConsEnd /STK=1 /UG=Ghi.4209 /UG_TITLE=Transcribed locus /REP_ORG=G. hirsutum
Ghi.843.1.A1_a_at	DT047545	Ghi.843	3.69815	0	gb:DT047545 /DB_XREF=gi:72270218 /DB_XREF=COT_CP_C11 /TID=Ghi.843.1 /CNT=1 /FEA=EST /TIER=ConsEnd /STK=1 /UG=Ghi.843 /UG_TITLE=Transcribed locus, moderately similar to NP_173240.2 nucleic acid binding nucleotidyltransferase polynucleotide adenylyltransferase (Arabidopsis thaliana) /REP_ORG=G. hirsutum
Ghi.8614.1.A1_at	DT046410	Ghi.8614	3.69777	0	gb:DT046410 /DB_XREF=gi:72267723 /DB_XREF=COT_AA_E04 /TID=Ghi.8614.1 /CNT=4 /FEA=EST /TIER=ConsEnd /STK=4 /UG=Ghi.8614 /UG_TITLE=Transcribed locus, strongly similar to NP_189598.1 unknown protein (Arabidopsis thaliana) /REP_ORG=G. hirsutum
Ghi.5776.1.S1_at	DN760236	Ghi.5776	3.69264	0	gb:DN760236 /DB_XREF=gi:84145994 /DB_XREF=G.hir-stem 2743 /TID=Ghi.5776.1 /CNT=3 /FEA=EST /TIER=ConsEnd /STK=0 /UG=Ghi.5776 /UG_TITLE=Transcribed locus, moderately similar to NP_193139.1 selenium binding (Arabidopsis thaliana) /REP_ORG=G. hirsutum
GhiAffx.56708.1.S1_at	DW489421.1	Ghi.14025	3.68748	0	gb:DW489421.1 dbest_id:35093849 /TID=GhiAffx.56708.1 /CNT=4 /FEA=EST /TIER=ConsEnd /STK=0 /NOTE=sequence(s) not in UniGene /REP_ORG=
Ghi.6247.1.A1_s_at	DT465370	---	3.68447	0	gb:DT465370 /DB_XREF=gi:73862631 /DB_XREF=GH_CHX17E03.r /CLONE=GH_CHX17E03 /TID=Ghi.6247.1 /CNT=1 /FEA=EST /TIER=ConsEnd /STK=1 /UG=Ghi.6247 /UG_TITLE=Transcribed locus, weakly similar to NP_850037.1 unknown protein (Arabidopsis thaliana) /REP_ORG=G. hirsutum
GhiAffx.27788.1.A1_at	DW520149.1	Ghi.4190	3.68231	0	gb:DW520149.1 dbest_id:35125932 /TID=GhiAffx.27788.1 /CNT=2 /FEA=EST /TIER=ConsEnd /STK=1 /NOTE=sequence(s) not in UniGene /REP_ORG=
Ghi.8981.1.A1_s_at	DT460762	Ghi.17759	3.68201	0	gb:DT460762 /DB_XREF=gi:73851742 /DB_XREF=GH_ON39M24.r /CLONE=GH_ON39M24 /TID=Ghi.8981.1 /CNT=5 /FEA=EST /TIER=ConsEnd /STK=1 /UG=Ghi.8981 /UG_TITLE=Transcribed locus, strongly similar to XP_464729.1 putative SerThr specific protein phosphatase 2A B regulatory subunit (Oryza sativa (japonica cultivar-group)) /REP_ORG=G. hirsutum
Ghi.538.1.S1_at	DN818081	Ghi.538	3.67793	0	gb:DN818081 /DB_XREF=gi:84156855 /DB_XREF=G.hir-seedling 1281 /TID=Ghi.538.1 /CNT=2 /FEA=EST /TIER=ConsEnd /STK=0 /UG=Ghi.538 /UG_TITLE=Transcribed locus, moderately similar to NP_196413.1 unknown protein (Arabidopsis thaliana) /REP_ORG=G. hirsutum
GraAffx.13239.1.A1_s_at	CO131355	---	3.67525	0	gb:CO131355 /DB_XREF=gi:48880333 /DB_XREF=GR__Eb43J19.r /CLONE=GR__Eb43J19 /TID=GraAffx.13239.1 /CNT=2 /FEA=EST /TIER=ConsEnd /STK=2 /NOTE=sequence(s) not in UniGene /REP_ORG=G. raimondii
Ghi.6878.1.A1_at	CA992781	Ghi.6878	3.67369	0.00854976	gb:CA992781 /DB_XREF=gi:31072502 /DB_XREF=pAR01C01 /TID=Ghi.6878.1 /CNT=2 /FEA=EST /TIER=ConsEnd /STK=0 /UG=Ghi.6878 /UG_TITLE=Transcribed locus /REP_ORG=G. hirsutum
Ghi.730.1.S1_at	CA993248	Ghi.16393	3.66933	0	gb:CA993248 /DB_XREF=gi:31072969 /DB_XREF=pAR06A02 /TID=Ghi.730.1 /CNT=2 /FEA=EST /TIER=ConsEnd /STK=0 /UG=Ghi.730 /UG_TITLE=Transcribed locus, weakly similar to NP_193595.3 wave5 (Arabidopsis thaliana) /REP_ORG=G. hirsutum
Gra.222.1.A1_s_at	CO092419	Gra.222	3.6684	0	gb:CO092419 /DB_XREF=gi:48791105 /DB_XREF=GR__Ea13G21.r /CLONE=GR__Ea13G21 /TID=Gra.222.1 /CNT=6 /FEA=EST /TIER=ConsEnd /STK=4 /UG=Gra.222 /UG_TITLE=Transcribed locus, weakly similar to NP_191814.1 universal stress protein (USP) family protein (Arabidopsis thaliana) /REP_ORG=G. raimondii
Ghi.7162.1.S1_at	AW187596	Ghi.7162	3.66531	0	gb:AW187596 /DB_XREF=gi:6462032 /DB_XREF=BNLGHi8124 /TID=Ghi.7162.1 /CNT=3 /FEA=EST /TIER=ConsEnd /STK=0 /UG=Ghi.7162 /UG_TITLE=Transcribed locus, weakly similar to NP_189329.3 double-stranded RNA binding (Arabidopsis thaliana) /REP_ORG=G. hirsutum
Ghi.5241.1.S1_at	DT048521	Ghi.5241	3.66438	0	gb:DT048521 /DB_XREF=gi:72272179 /DB_XREF=COT_DB_E07 /TID=Ghi.5241.1 /CNT=2 /FEA=EST /TIER=ConsEnd /STK=1 /UG=Ghi.5241 /UG_TITLE=Transcribed locus /REP_ORG=G. hirsutum
Ghi.8752.1.A1_at	DT052934	Ghi.8752	3.6632	0	gb:DT052934 /DB_XREF=gi:72281357 /DB_XREF=COT_FJ_A02 /TID=Ghi.8752.1 /CNT=4 /FEA=EST /TIER=ConsEnd /STK=1 /UG=Ghi.8752 /UG_TITLE=Transcribed locus /REP_ORG=G. hirsutum
Ghi.4197.1.S1_at	DT456250	Ghi.4197	3.66248	0	gb:DT456250 /DB_XREF=gi:73847230 /DB_XREF=GH_ON13E01.f /CLONE=GH_ON13E01 /TID=Ghi.4197.1 /CNT=3 /FEA=EST /TIER=ConsEnd /STK=0 /UG=Ghi.4197 /UG_TITLE=Transcribed locus, weakly similar to XP_470160.1 putative polyprotein (Oryza sativa (japonica cultivar-group)) /REP_ORG=G. hirsutum
GhiAffx.42005.1.S1_at	DN826542	---	3.66014	0	gb:DN826542 /DB_XREF=gi:84157495 /DB_XREF=G.hir-8,14 hrs post inoculation 485 /TID=GhiAffx.42005.1 /CNT=3 /FEA=EST /TIER=ConsEnd /STK=0 /NOTE=sequence(s) not in UniGene /REP_ORG=G. hirsutum
Ghi.6731.1.S1_at	CA993440	Ghi.6731	3.66003	0	gb:CA993440 /DB_XREF=gi:31073161 /DB_XREF=pAR07G03 /TID=Ghi.6731.1 /CNT=1 /FEA=EST /TIER=ConsEnd /STK=0 /UG=Ghi.6731 /UG_TITLE=Transcribed locus /REP_ORG=G. hirsutum
Ghi.5779.1.S1_at	DN779269	Ghi.5779	3.65986	0	gb:DN779269 /DB_XREF=gi:62295650 /DB_XREF=CFUS1.4F03 /CLONE=CFUS1.4F03 /TID=Ghi.5779.1 /CNT=1 /FEA=EST /TIER=ConsEnd /STK=0 /UG=Ghi.5779 /UG_TITLE=Transcribed locus /REP_ORG=G. hirsutum
Ghi.76.1.S1_s_at	DR463121	Ghi.76	3.65855	0	gb:DR463121 /DB_XREF=gi:84174473 /DB_XREF=CM115A11 /TID=Ghi.76.1 /CNT=1 /FEA=EST /TIER=ConsEnd /STK=0 /UG=Ghi.76 /UG_TITLE=Transcribed locus, moderately similar to NP_195370.2 unknown protein (Arabidopsis thaliana) /REP_ORG=G. hirsutum
Ghi.6535.1.A1_at	CA993808	Ghi.6535	3.65817	0	gb:CA993808 /DB_XREF=gi:31073529 /DB_XREF=pAR10G09 /TID=Ghi.6535.1 /CNT=2 /FEA=EST /TIER=ConsEnd /STK=0 /UG=Ghi.6535 /UG_TITLE=Transcribed locus, weakly similar to NP_566685.1 oxidoreductase (Arabidopsis thaliana) /REP_ORG=G. hirsutum
Ghi.6343.3.A1_at	CO494811	Ghi.6343	3.65438	0	gb:CO494811 /DB_XREF=gi:54119302 /DB_XREF=G.h.fbr-sw04201 /TID=Ghi.6343.3 /CNT=1 /FEA=EST /TIER=ConsEnd /STK=0 /UG=Ghi.6343 /UG_TITLE=Transcribed locus /REP_ORG=G. hirsutum
GhiAffx.6981.1.S1_x_at	DW506793.1	Ghi.21749	3.65396	0	gb:DW506793.1 dbest_id:35112576 /TID=GhiAffx.6981.1 /CNT=2 /FEA=EST /TIER=ConsEnd /STK=0 /NOTE=sequence(s) not in UniGene /REP_ORG=
GhiAffx.50429.1.S1_x_at	DR454710	Ghi.19409	3.64762	0	gb:DR454710 /DB_XREF=gi:84166062 /DB_XREF=CM026F05 /TID=GhiAffx.50429.1 /CNT=2 /FEA=EST /TIER=ConsEnd /STK=0 /NOTE=sequence(s) not in UniGene /REP_ORG=G. hirsutum
Ghi.4247.1.S1_at	DT456055	Ghi.4247	3.64731	0	gb:DT456055 /DB_XREF=gi:73847035 /DB_XREF=GH_ON11B06.f /CLONE=GH_ON11B06 /TID=Ghi.4247.1 /CNT=3 /FEA=EST /TIER=ConsEnd /STK=0 /UG=Ghi.4247 /UG_TITLE=Transcribed locus /REP_ORG=G. hirsutum
GhiAffx.34015.1.S1_at	DN799909	Ghi.12991	3.64721	0	gb:DN799909 /DB_XREF=gi:84150554 /DB_XREF=G.hir-cold stressed seedling 95 /TID=GhiAffx.34015.1 /CNT=3 /FEA=EST /TIER=ConsEnd /STK=0 /NOTE=sequence(s) not in UniGene /REP_ORG=G. hirsutum
Ghi.4065.1.A1_x_at	DT458447	Ghi.4065	3.64719	0	gb:DT458447 /DB_XREF=gi:73849427 /DB_XREF=GH_ON36C15.r /CLONE=GH_ON36C15 /TID=Ghi.4065.1 /CNT=2 /FEA=EST /TIER=ConsEnd /STK=1 /UG=Ghi.4065 /UG_TITLE=Transcribed locus /REP_ORG=G. hirsutum
Gra.97.1.A1_s_at	CO087455	Gra.97	3.64691	0.0238141	gb:CO087455 /DB_XREF=gi:48778089 /DB_XREF=GR__Ea05O19.r /CLONE=GR__Ea05O19 /TID=Gra.97.1 /CNT=2 /FEA=EST /TIER=ConsEnd /STK=1 /UG=Gra.97 /UG_TITLE=Transcribed locus, weakly similar to XP_470614.1 Putative Squalene monooxygenase (Oryza sativa (japonica cultivar-group)) /REP_ORG=G. raimondii
Ghi.3089.1.A1_at	DT463991	Ghi.3089	3.6453	0	gb:DT463991 /DB_XREF=gi:73861252 /DB_XREF=GH_CHX14L17.r /CLONE=GH_CHX14L17 /TID=Ghi.3089.1 /CNT=5 /FEA=EST /TIER=ConsEnd /STK=0 /UG=Ghi.3089 /UG_TITLE=Transcribed locus, weakly similar to NP_197831.3 ATP binding calcium ion binding calcium-dependent protein serinethreonine phosphatase kinase protein kinase protein serinethreonine kinase protein-tyrosine kinase (Arabidopsis thaliana) /REP_ORG=G. h…
GraAffx.34266.1.A1_at	CO069457	---	3.64171	0.0292223	gb:CO069457 /DB_XREF=gi:48738938 /DB_XREF=GR__Ea26A18.r /CLONE=GR__Ea26A18 /TID=GraAffx.34266.1 /CNT=2 /FEA=EST /TIER=ConsEnd /STK=1 /NOTE=sequence(s) not in UniGene /REP_ORG=G. raimondii
Ghi.8062.1.S1_at	Y10112.2	Ghi.8062	3.64151	0.00854976	gb:Y10112.2 /DB_XREF=gi:4490390 /TID=Ghi.8062.1 /CNT=2 /FEA=mRNA /TIER=ConsEnd /STK=0 /UG=Ghi.8062 /DEF=Gossypium hirsutum mRNA for omega-6 desaturase. /PROD=omega-6 desaturase /REP_ORG=G. hirsutum
Ghi.1005.1.A1_at	DR452316	Ghi.1005	3.63493	0	gb:DR452316 /DB_XREF=gi:84163668 /DB_XREF=CM001C12 /TID=Ghi.1005.1 /CNT=1 /FEA=EST /TIER=ConsEnd /STK=0 /UG=Ghi.1005 /UG_TITLE=Transcribed locus, weakly similar to NP_680731.2 unknown protein (Arabidopsis thaliana) /REP_ORG=G. hirsutum
GhiAffx.514.1.S1_at	DW514586.1	Ghi.4495	3.63437	0	gb:DW514586.1 dbest_id:35120369 /TID=GhiAffx.514.1 /CNT=3 /FEA=EST /TIER=ConsEnd /STK=1 /NOTE=sequence(s) not in UniGene /REP_ORG=
Ghi.106.1.S1_s_at	DR462832	Ghi.106	3.63415	0	gb:DR462832 /DB_XREF=gi:84174184 /DB_XREF=CM112A10 /TID=Ghi.106.1 /CNT=7 /FEA=EST /TIER=ConsEnd /STK=0 /UG=Ghi.106 /UG_TITLE=Transcribed locus /REP_ORG=G. hirsutum
Gra.1433.1.A1_at	CO102466	---	3.63389	0.00854976	gb:CO102466 /DB_XREF=gi:48801152 /DB_XREF=GR__Eb0029O19.r /CLONE=GR__Eb0029O19 /TID=Gra.1433.1 /CNT=1 /FEA=EST /TIER=ConsEnd /STK=1 /UG=Gra.1433 /UG_TITLE=Transcribed locus, moderately similar to NP_193563.1 inward rectifying potassium channel (KAT2) (Arabidopsis thaliana) /REP_ORG=G. raimondii
Ghi.1106.1.S1_at	DN817537	Ghi.1106	3.6322	0	gb:DN817537 /DB_XREF=gi:84156311 /DB_XREF=G.hir-seedling 737 /TID=Ghi.1106.1 /CNT=1 /FEA=EST /TIER=ConsEnd /STK=1 /UG=Ghi.1106 /UG_TITLE=Transcribed locus /REP_ORG=G. hirsutum
Ghi.5453.3.A1_at	DT047690	Ghi.16473	3.63196	0	gb:DT047690 /DB_XREF=gi:72270512 /DB_XREF=COT_CR_A12 /TID=Ghi.5453.3 /CNT=1 /FEA=EST /TIER=ConsEnd /STK=1 /UG=Ghi.5453 /UG_TITLE=Transcribed locus, weakly similar to XP_472785.1 OSJNBa0060P14.15 (Oryza sativa (japonica cultivar-group)) /REP_ORG=G. hirsutum
GhiAffx.62414.1.S1_at	DW514582.1	Ghi.12916	3.63085	0	gb:DW514582.1 dbest_id:35120365 /TID=GhiAffx.62414.1 /CNT=3 /FEA=EST /TIER=ConsEnd /STK=1 /NOTE=sequence(s) not in UniGene /REP_ORG=
GhiAffx.25125.1.S1_s_at	DW514758.1	---	3.62796	0.257021	gb:DW514758.1 dbest_id:35120541 /TID=GhiAffx.25125.1 /CNT=2 /FEA=EST /TIER=ConsEnd /STK=1 /NOTE=sequence(s) not in UniGene /REP_ORG=
GhiAffx.34523.1.A1_s_at	DW227339.1	Ghi.15574	3.62595	0	gb:DW227339.1 dbest_id:34831511 /TID=GhiAffx.34523.1 /CNT=4 /FEA=EST /TIER=ConsEnd /STK=1 /NOTE=sequence(s) not in UniGene /REP_ORG=
Ghi.9159.1.A1_at	DT464118	Ghi.9159	3.62561	0	gb:DT464118 /DB_XREF=gi:73861379 /DB_XREF=GH_CHX15A22.r /CLONE=GH_CHX15A22 /TID=Ghi.9159.1 /CNT=2 /FEA=EST /TIER=ConsEnd /STK=2 /UG=Ghi.9159 /UG_TITLE=Transcribed locus, weakly similar to NP_172631.1 ATP binding (Arabidopsis thaliana) /REP_ORG=G. hirsutum
Gra.2948.4.A1_s_at	CO090457	Gra.2948	3.62378	0	gb:CO090457 /DB_XREF=gi:48789143 /DB_XREF=GR__Ea10H12.r /CLONE=GR__Ea10H12 /TID=Gra.2948.4 /CNT=1 /FEA=EST /TIER=ConsEnd /STK=1 /UG=Gra.2948 /UG_TITLE=Transcribed locus, strongly similar to NP_565674.1 AP2 domain-containing transcription factor RAP2.7 (RAP2.7) (Arabidopsis thaliana) /REP_ORG=G. raimondii
GhiAffx.2749.1.S1_a_at	CA993506	Ghi.14047	3.62067	0	gb:CA993506 /DB_XREF=gi:31073227 /DB_XREF=pAR08A04 /TID=GhiAffx.2749.1 /CNT=3 /FEA=EST /TIER=ConsEnd /STK=0 /NOTE=sequence(s) not in UniGene /REP_ORG=G. hirsutum
Ghi.3564.1.S1_at	DT464244	Ghi.3564	3.61853	0	gb:DT464244 /DB_XREF=gi:73861505 /DB_XREF=GH_CHX15E20.r /CLONE=GH_CHX15E20 /TID=Ghi.3564.1 /CNT=4 /FEA=EST /TIER=ConsEnd /STK=1 /UG=Ghi.3564 /UG_TITLE=Transcribed locus /REP_ORG=G. hirsutum
GhiAffx.43282.1.S1_s_at	DW512370.1	---	3.61802	0	gb:DW512370.1 dbest_id:35118153 /TID=GhiAffx.43282.1 /CNT=2 /FEA=EST /TIER=ConsEnd /STK=1 /NOTE=sequence(s) not in UniGene /REP_ORG=
GhiAffx.43655.1.S1_at	DW514533.1	---	3.61771	0	gb:DW514533.1 dbest_id:35120316 /TID=GhiAffx.43655.1 /CNT=2 /FEA=EST /TIER=ConsEnd /STK=1 /NOTE=sequence(s) not in UniGene /REP_ORG=
GhiAffx.33971.1.S1_at	DW513106.1	Ghi.14181	3.61663	0	gb:DW513106.1 dbest_id:35118889 /TID=GhiAffx.33971.1 /CNT=3 /FEA=EST /TIER=ConsEnd /STK=0 /NOTE=sequence(s) not in UniGene /REP_ORG=
GhiAffx.13666.2.S1_x_at	DW232946.1	Ghi.15793	3.61605	0	gb:DW232946.1 dbest_id:34837112 /TID=GhiAffx.13666.2 /CNT=3 /FEA=EST /TIER=ConsEnd /STK=0 /NOTE=sequence(s) not in UniGene /REP_ORG=
Gra.2458.2.S1_at	CO090512	Gra.2458	3.61594	0	gb:CO090512 /DB_XREF=gi:48789198 /DB_XREF=GR__Ea10I18.f /CLONE=GR__Ea10I18 /TID=Gra.2458.2 /CNT=2 /FEA=EST /TIER=ConsEnd /STK=0 /UG=Gra.2458 /UG_TITLE=Transcribed locus, weakly similar to NP_563674.1 methylcrotonyl-CoA carboxylase alpha chain, mitochondrial 3-methylcrotonyl-CoA carboxylase 1 (MCCA) (Arabidopsis thaliana) /REP_ORG=G. raimondii
Ghi.3273.1.A1_at	DT466050	Ghi.3273	3.61513	0	gb:DT466050 /DB_XREF=gi:73863311 /DB_XREF=GH_CHX18F06.r /CLONE=GH_CHX18F06 /TID=Ghi.3273.1 /CNT=4 /FEA=EST /TIER=ConsEnd /STK=1 /UG=Ghi.3273 /UG_TITLE=Transcribed locus, weakly similar to NP_567644.1 WRKY31; transcription factor (Arabidopsis thaliana) /REP_ORG=G. hirsutum
GhiAffx.27567.1.S1_at	DW519245.1	Ghi.12994	3.61349	0	gb:DW519245.1 dbest_id:35125028 /TID=GhiAffx.27567.1 /CNT=3 /FEA=EST /TIER=ConsEnd /STK=2 /NOTE=sequence(s) not in UniGene /REP_ORG=
Ghi.8874.1.A1_at	DT457152	Ghi.8874	3.61214	0	gb:DT457152 /DB_XREF=gi:73848132 /DB_XREF=GH_ON34C01.r /CLONE=GH_ON34C01 /TID=Ghi.8874.1 /CNT=3 /FEA=EST /TIER=ConsEnd /STK=1 /UG=Ghi.8874 /UG_TITLE=Transcribed locus, moderately similar to NP_196886.1 TBP1 (TELOMERIC DNA BINDING PROTEIN 1); DNA binding (Arabidopsis thaliana) /REP_ORG=G. hirsutum
Ghi.3365.1.A1_at	DT466837	Ghi.3365	3.60884	0	gb:DT466837 /DB_XREF=gi:73864098 /DB_XREF=GH_CHX19H22.r /CLONE=GH_CHX19H22 /TID=Ghi.3365.1 /CNT=1 /FEA=EST /TIER=ConsEnd /STK=1 /UG=Ghi.3365 /UG_TITLE=Transcribed locus, weakly similar to NP_197229.1 unknown protein (Arabidopsis thaliana) /REP_ORG=G. hirsutum
Ghi.3240.1.A1_at	DT468114	Ghi.6008	3.60679	0	gb:DT468114 /DB_XREF=gi:73865376 /DB_XREF=GH_CHX21G13.r /CLONE=GH_CHX21G13 /TID=Ghi.3240.1 /CNT=1 /FEA=EST /TIER=ConsEnd /STK=1 /UG=Ghi.3240 /UG_TITLE=Transcribed locus, moderately similar to NP_176898.1 carbohydrate transporter sugar porter (Arabidopsis thaliana) /REP_ORG=G. hirsutum
Ghi.3685.1.S1_at	DT462671	Ghi.3685	3.60212	0	gb:DT462671 /DB_XREF=gi:73859932 /DB_XREF=GH_CHX12G23.r /CLONE=GH_CHX12G23 /TID=Ghi.3685.1 /CNT=51 /FEA=EST /TIER=ConsEnd /STK=1 /UG=Ghi.3685 /UG_TITLE=Transcribed locus, moderately similar to NP_195118.1 catalytic protein phosphatase type 2C (Arabidopsis thaliana) /REP_ORG=G. hirsutum
Ghi.4218.1.A1_s_at	DR462852	Ghi.4218	3.59964	0	gb:DR462852 /DB_XREF=gi:84174204 /DB_XREF=CM112C06 /TID=Ghi.4218.1 /CNT=2 /FEA=EST /TIER=ConsEnd /STK=0 /UG=Ghi.4218 /UG_TITLE=Transcribed locus /REP_ORG=G. hirsutum
GhiAffx.3184.1.S1_s_at	DW517244.1	Ghi.16019	3.59943	0	gb:DW517244.1 dbest_id:35123027 /TID=GhiAffx.3184.1 /CNT=6 /FEA=EST /TIER=ConsEnd /STK=1 /NOTE=sequence(s) not in UniGene /REP_ORG=
Ghi.3139.1.S1_at	DT463609	Ghi.3139	3.59803	0	gb:DT463609 /DB_XREF=gi:73860870 /DB_XREF=GH_CHX13M24.r /CLONE=GH_CHX13M24 /TID=Ghi.3139.1 /CNT=3 /FEA=EST /TIER=ConsEnd /STK=1 /UG=Ghi.3139 /UG_TITLE=Transcribed locus, weakly similar to NP_172849.1 WRKY4; transcription factor (Arabidopsis thaliana) /REP_ORG=G. hirsutum
Ghi.6715.1.A1_at	CA993528	Ghi.6715	3.59708	0	gb:CA993528 /DB_XREF=gi:31073249 /DB_XREF=pAR08C05 /TID=Ghi.6715.1 /CNT=2 /FEA=EST /TIER=ConsEnd /STK=0 /UG=Ghi.6715 /UG_TITLE=Transcribed locus, moderately similar to NP_180664.2 GTP binding translation elongation factor (Arabidopsis thaliana) /REP_ORG=G. hirsutum
GhiAffx.49677.1.S1_at	DT467829	Ghi.3268	3.59643	0	gb:DT467829 /DB_XREF=gi:73865090 /DB_XREF=GH_CHX20P22.f /CLONE=GH_CHX20P22 /TID=GhiAffx.49677.1 /CNT=2 /FEA=EST /TIER=ConsEnd /STK=0 /NOTE=sequence(s) not in UniGene /REP_ORG=G. hirsutum
GhiAffx.40671.1.A1_s_at	DW498885.1	---	3.59253	0	gb:DW498885.1 dbest_id:35103313 /TID=GhiAffx.40671.1 /CNT=1 /FEA=EST /TIER=ConsEnd /STK=1 /NOTE=sequence(s) not in UniGene /REP_ORG=
Ghi.3565.2.A1_a_at	DT464242	Ghi.3565	3.58985	0.0292223	gb:DT464242 /DB_XREF=gi:73861503 /DB_XREF=GH_CHX15E19.r /CLONE=GH_CHX15E19 /TID=Ghi.3565.2 /CNT=2 /FEA=EST /TIER=ConsEnd /STK=1 /UG=Ghi.3565 /UG_TITLE=Transcribed locus, moderately similar to NP_188933.1 calcium ion binding (Arabidopsis thaliana) /REP_ORG=G. hirsutum
Ghi.558.1.S1_at	AI055153	Ghi.558	3.58631	0	gb:AI055153 /DB_XREF=gi:3326267 /DB_XREF=coau0003D01 /CLONE=coau0003D01 /TID=Ghi.558.1 /CNT=3 /FEA=EST /TIER=ConsEnd /STK=0 /UG=Ghi.558 /UG_TITLE=Transcribed locus /REP_ORG=G. hirsutum
GhiAffx.25074.1.S1_at	DW514447.1	---	3.58193	0	gb:DW514447.1 dbest_id:35120230 /TID=GhiAffx.25074.1 /CNT=2 /FEA=EST /TIER=ConsEnd /STK=1 /NOTE=sequence(s) not in UniGene /REP_ORG=
Ghi.9240.1.S1_s_at	DT468893	Ghi.9240	3.58136	0	gb:DT468893 /DB_XREF=gi:73866155 /DB_XREF=GH_CHX22J24.r /CLONE=GH_CHX22J24 /TID=Ghi.9240.1 /CNT=22 /FEA=EST /TIER=ConsEnd /STK=2 /UG=Ghi.9240 /UG_TITLE=Transcribed locus, strongly similar to NP_181381.2 WRKY33; transcription factor (Arabidopsis thaliana) /REP_ORG=G. hirsutum
GhiAffx.36353.1.S1_at	DW481268.1	Ghi.14381	3.58113	0	gb:DW481268.1 dbest_id:35085696 /TID=GhiAffx.36353.1 /CNT=4 /FEA=EST /TIER=ConsEnd /STK=0 /NOTE=sequence(s) not in UniGene /REP_ORG=
GhiAffx.7609.1.S1_at	DW513579.1	Ghi.13533	3.57991	0	gb:DW513579.1 dbest_id:35119362 /TID=GhiAffx.7609.1 /CNT=4 /FEA=EST /TIER=ConsEnd /STK=0 /NOTE=sequence(s) not in UniGene /REP_ORG=
Ghi.9268.1.S1_x_at	DT463525	Ghi.17268	3.57825	0	gb:DT463525 /DB_XREF=gi:73860786 /DB_XREF=GH_CHX13K24.r /CLONE=GH_CHX13K24 /TID=Ghi.9268.1 /CNT=9 /FEA=EST /TIER=ConsEnd /STK=1 /UG=Ghi.9268 /UG_TITLE=Transcribed locus, strongly similar to XP_851595.1 PREDICTED: similar to Copia protein (Gag-int-pol protein) (Canis familiaris) /REP_ORG=G. hirsutum
Ghi.6088.2.S1_at	DT467539	Ghi.6088	3.57754	0	gb:DT467539 /DB_XREF=gi:73864800 /DB_XREF=GH_CHX20J06.f /CLONE=GH_CHX20J06 /TID=Ghi.6088.2 /CNT=4 /FEA=EST /TIER=ConsEnd /STK=0 /UG=Ghi.6088 /UG_TITLE=Transcribed locus, strongly similar to NP_190150.1 ATMPK3 (MITOGEN-ACTIVATED PROTEIN KINASE 3); MAP kinase kinase protein kinase (Arabidopsis thaliana) /REP_ORG=G. hirsutum
Ghi.807.1.S1_s_at	DT465871	Ghi.17797	3.57212	0	gb:DT465871 /DB_XREF=gi:73863132 /DB_XREF=GH_CHX18B03.r /CLONE=GH_CHX18B03 /TID=Ghi.807.1 /CNT=17 /FEA=EST /TIER=ConsEnd /STK=3 /UG=Ghi.807 /UG_TITLE=Transcribed locus, weakly similar to NP_174094.1 ZAT10; nucleic acid binding transcription factor zinc ion binding (Arabidopsis thaliana) /REP_ORG=G. hirsutum
GhiAffx.16626.1.S1_at	DT463134	Ghi.13630	3.56708	0	gb:DT463134 /DB_XREF=gi:73860395 /DB_XREF=GH_CHX13C01.r /CLONE=GH_CHX13C01 /TID=GhiAffx.16626.1 /CNT=3 /FEA=EST /TIER=ConsEnd /STK=1 /NOTE=sequence(s) not in UniGene /REP_ORG=G. hirsutum
GhiAffx.45365.1.A1_at	DT463406	Ghi.13620	3.56104	0	gb:DT463406 /DB_XREF=gi:73860667 /DB_XREF=GH_CHX13I05.r /CLONE=GH_CHX13I05 /TID=GhiAffx.45365.1 /CNT=3 /FEA=EST /TIER=ConsEnd /STK=1 /NOTE=sequence(s) not in UniGene /REP_ORG=G. hirsutum
Ghi.8702.1.A1_at	DT050718	Ghi.8702	3.56104	0	gb:DT050718 /DB_XREF=gi:72276604 /DB_XREF=COT_ED_B02 /TID=Ghi.8702.1 /CNT=4 /FEA=EST /TIER=ConsEnd /STK=3 /UG=Ghi.8702 /UG_TITLE=Transcribed locus /REP_ORG=G. hirsutum
GraAffx.28170.1.S1_s_at	CO087306	---	3.55933	0	gb:CO087306 /DB_XREF=gi:48777940 /DB_XREF=GR__Ea05L10.r /CLONE=GR__Ea05L10 /TID=GraAffx.28170.1 /CNT=2 /FEA=EST /TIER=ConsEnd /STK=1 /NOTE=sequence(s) not in UniGene /REP_ORG=G. raimondii
GhiAffx.12774.1.S1_x_at	DW501902.1	Ghi.11760	3.55826	0	gb:DW501902.1 dbest_id:35106330 /TID=GhiAffx.12774.1 /CNT=2 /FEA=EST /TIER=ConsEnd /STK=0 /NOTE=sequence(s) not in UniGene /REP_ORG=
GhiAffx.11958.1.S1_at	DW501942.1	Ghi.13292	3.55667	0	gb:DW501942.1 dbest_id:35106370 /TID=GhiAffx.11958.1 /CNT=4 /FEA=EST /TIER=ConsEnd /STK=0 /NOTE=sequence(s) not in UniGene /REP_ORG=
Ghi.6082.1.S1_at	DT468085	Ghi.6082	3.55442	0	gb:DT468085 /DB_XREF=gi:73865347 /DB_XREF=GH_CHX21F22.f /CLONE=GH_CHX21F22 /TID=Ghi.6082.1 /CNT=3 /FEA=EST /TIER=ConsEnd /STK=0 /UG=Ghi.6082 /UG_TITLE=Transcribed locus, strongly similar to NP_568180.1 BON2 (BONZAI 2) (Arabidopsis thaliana) /REP_ORG=G. hirsutum
Gra.1024.1.S1_at	CO121659	Gra.1024	3.55383	0	gb:CO121659 /DB_XREF=gi:48820346 /DB_XREF=GR__Eb02P01.r /CLONE=GR__Eb02P01 /TID=Gra.1024.1 /CNT=4 /FEA=EST /TIER=ConsEnd /STK=1 /UG=Gra.1024 /UG_TITLE=Transcribed locus, moderately similar to NP_196469.1 myb family transcription factor (Arabidopsis thaliana) /REP_ORG=G. raimondii
Ghi.3402.1.A1_at	DT466310	Ghi.3402	3.55346	0	gb:DT466310 /DB_XREF=gi:73863571 /DB_XREF=GH_CHX18L04.r /CLONE=GH_CHX18L04 /TID=Ghi.3402.1 /CNT=3 /FEA=EST /TIER=ConsEnd /STK=1 /UG=Ghi.3402 /UG_TITLE=Transcribed locus, weakly similar to NP_565618.1 calmodulin binding (Arabidopsis thaliana) /REP_ORG=G. hirsutum
GhiAffx.24041.1.S1_at	DW230385.1	Ghi.11526	3.55291	0	gb:DW230385.1 dbest_id:34834557 /TID=GhiAffx.24041.1 /CNT=3 /FEA=EST /TIER=ConsEnd /STK=0 /NOTE=sequence(s) not in UniGene /REP_ORG=
Ghi.5547.1.A1_at	DT462675	Ghi.5547	3.54965	0	gb:DT462675 /DB_XREF=gi:73859936 /DB_XREF=GH_CHX12H01.r /CLONE=GH_CHX12H01 /TID=Ghi.5547.1 /CNT=3 /FEA=EST /TIER=ConsEnd /STK=2 /UG=Ghi.5547 /UG_TITLE=Transcribed locus, weakly similar to NP_567691.1 ATP binding ATPase metalloendopeptidase metallopeptidase nucleoside-triphosphatase nucleotide binding (Arabidopsis thaliana) /REP_ORG=G. hirsutum
GhiAffx.14838.1.S1_at	DW489320.1	Ghi.14098	3.54763	0	gb:DW489320.1 dbest_id:35093748 /TID=GhiAffx.14838.1 /CNT=3 /FEA=EST /TIER=ConsEnd /STK=0 /NOTE=sequence(s) not in UniGene /REP_ORG=
Ghi.3263.1.S1_at	DT467895	Ghi.3263	3.54722	0	gb:DT467895 /DB_XREF=gi:73865156 /DB_XREF=GH_CHX21B15.r /CLONE=GH_CHX21B15 /TID=Ghi.3263.1 /CNT=2 /FEA=EST /TIER=ConsEnd /STK=0 /UG=Ghi.3263 /UG_TITLE=Transcribed locus /REP_ORG=G. hirsutum
Ghi.495.1.S1_at	DR458926	Ghi.495	3.54521	0	gb:DR458926 /DB_XREF=gi:84170278 /DB_XREF=CM070H09 /TID=Ghi.495.1 /CNT=1 /FEA=EST /TIER=ConsEnd /STK=0 /UG=Ghi.495 /UG_TITLE=Transcribed locus, moderately similar to NP_200224.1 calcium ion binding (Arabidopsis thaliana) /REP_ORG=G. hirsutum
Ghi.864.1.S1_s_at	DR453877	Ghi.864	3.54249	0	gb:DR453877 /DB_XREF=gi:84165229 /DB_XREF=CM017H06 /TID=Ghi.864.1 /CNT=1 /FEA=EST /TIER=ConsEnd /STK=0 /UG=Ghi.864 /UG_TITLE=Transcribed locus /REP_ORG=G. hirsutum
Ghi.9910.1.S1_s_at	DT048922	Ghi.9910	3.54025	0	gb:DT048922 /DB_XREF=gi:72272976 /DB_XREF=COT_DG_F04 /TID=Ghi.9910.1 /CNT=8 /FEA=EST /TIER=ConsEnd /STK=0 /UG=Ghi.9910 /UG_TITLE=Transcribed locus, moderately similar to NP_193027.2 SCPL20; serine carboxypeptidase (Arabidopsis thaliana) /REP_ORG=G. hirsutum
GarAffx.26709.1.S1_s_at	BQ405776	---	3.53963	0	gb:BQ405776 /DB_XREF=gi:21093463 /DB_XREF=GA__Ed0086G02f /CLONE=GA__Ed0086G02f /TID=GarAffx.26709.1 /CNT=1 /FEA=EST /TIER=ConsEnd /STK=1 /NOTE=sequence(s) not in UniGene /REP_ORG=G. arboreum
GhiAffx.60966.1.S1_at	DW507065.1	Ghi.13582	3.53771	0	gb:DW507065.1 dbest_id:35112848 /TID=GhiAffx.60966.1 /CNT=5 /FEA=EST /TIER=ConsEnd /STK=1 /NOTE=sequence(s) not in UniGene /REP_ORG=
GhiAffx.2168.1.A1_at	DT459304	---	3.53687	0	gb:DT459304 /DB_XREF=gi:73850284 /DB_XREF=GH_ON37H16.r /CLONE=GH_ON37H16 /TID=GhiAffx.2168.1 /CNT=2 /FEA=EST /TIER=ConsEnd /STK=1 /NOTE=sequence(s) not in UniGene /REP_ORG=G. hirsutum
Ghi.4926.1.A1_at	DT049884	Ghi.4926	3.53347	0	gb:DT049884 /DB_XREF=gi:72274905 /DB_XREF=COT_DS_D09 /TID=Ghi.4926.1 /CNT=3 /FEA=EST /TIER=ConsEnd /STK=1 /UG=Ghi.4926 /UG_TITLE=Transcribed locus, moderately similar to NP_193328.1 microtubule motor (Arabidopsis thaliana) /REP_ORG=G. hirsutum
Ghi.9301.1.S1_at	DT527083	Ghi.9301	3.53341	0	gb:DT527083 /DB_XREF=gi:73943775 /DB_XREF=GH_OCF04F01.f /CLONE=GH_OCF04F01 /TID=Ghi.9301.1 /CNT=4 /FEA=EST /TIER=ConsEnd /STK=0 /UG=Ghi.9301 /UG_TITLE=Transcribed locus /REP_ORG=G. hirsutum
GhiAffx.43638.1.S1_at	DW514422.1	---	3.53094	0	gb:DW514422.1 dbest_id:35120205 /TID=GhiAffx.43638.1 /CNT=2 /FEA=EST /TIER=ConsEnd /STK=1 /NOTE=sequence(s) not in UniGene /REP_ORG=
GhiAffx.28839.1.A1_at	DW500773.1	Ghi.12876	3.53008	0	gb:DW500773.1 dbest_id:35105201 /TID=GhiAffx.28839.1 /CNT=3 /FEA=EST /TIER=ConsEnd /STK=0 /NOTE=sequence(s) not in UniGene /REP_ORG=
GhiAffx.59851.1.S1_at	DW501467.1	Ghi.11774	3.5298	0	gb:DW501467.1 dbest_id:35105895 /TID=GhiAffx.59851.1 /CNT=3 /FEA=EST /TIER=ConsEnd /STK=1 /NOTE=sequence(s) not in UniGene /REP_ORG=
Ghi.5481.1.A1_at	DT047553	Ghi.5481	3.52844	0	gb:DT047553 /DB_XREF=gi:72270234 /DB_XREF=COT_CP_D08 /TID=Ghi.5481.1 /CNT=2 /FEA=EST /TIER=ConsEnd /STK=2 /UG=Ghi.5481 /UG_TITLE=Transcribed locus, moderately similar to XP_483362.1 putative mitochondrial energy transfer protein (Oryza sativa (japonica cultivar-group)) /REP_ORG=G. hirsutum
Ghi.3175.1.S1_at	DT468792	Ghi.19681	3.52649	0	gb:DT468792 /DB_XREF=gi:73866054 /DB_XREF=GH_CHX22H07.r /CLONE=GH_CHX22H07 /TID=Ghi.3175.1 /CNT=2 /FEA=EST /TIER=ConsEnd /STK=1 /UG=Ghi.3175 /UG_TITLE=Transcribed locus, moderately similar to NP_849323.1 nucleic acid binding zinc ion binding (Arabidopsis thaliana) /REP_ORG=G. hirsutum
Ghi.9155.2.A1_at	DT464000	Ghi.9155	3.52197	0	gb:DT464000 /DB_XREF=gi:73861261 /DB_XREF=GH_CHX14M04.r /CLONE=GH_CHX14M04 /TID=Ghi.9155.2 /CNT=2 /FEA=EST /TIER=ConsEnd /STK=1 /UG=Ghi.9155 /UG_TITLE=Transcribed locus /REP_ORG=G. hirsutum
Ghi.4794.1.A1_x_at	DT050583	Ghi.7728	3.51666	0	gb:DT050583 /DB_XREF=gi:72276334 /DB_XREF=COT_EB_D03 /TID=Ghi.4794.1 /CNT=1 /FEA=EST /TIER=ConsEnd /STK=1 /UG=Ghi.4794 /UG_TITLE=Transcribed locus /REP_ORG=G. hirsutum
GhiAffx.35173.1.S1_at	DW230585.1	Ghi.10953	3.51622	0	gb:DW230585.1 dbest_id:34834757 /TID=GhiAffx.35173.1 /CNT=3 /FEA=EST /TIER=ConsEnd /STK=1 /NOTE=sequence(s) not in UniGene /REP_ORG=
Ghi.847.1.S1_s_at	DR454059	Ghi.2787	3.5126	0	gb:DR454059 /DB_XREF=gi:84165411 /DB_XREF=CM019G09 /TID=Ghi.847.1 /CNT=1 /FEA=EST /TIER=ConsEnd /STK=0 /UG=Ghi.847 /UG_TITLE=Transcribed locus /REP_ORG=G. hirsutum
Ghi.7807.1.S1_at	AI726112	Ghi.7807	3.51084	0	gb:AI726112 /DB_XREF=gi:5044964 /DB_XREF=BNLGHi5040 /TID=Ghi.7807.1 /CNT=1 /FEA=EST /TIER=ConsEnd /STK=0 /UG=Ghi.7807 /UG_TITLE=Transcribed locus, weakly similar to NP_193171.2 ATP binding kinase protein kinase (Arabidopsis thaliana) /REP_ORG=G. hirsutum
GhiAffx.21968.2.A1_s_at	DT458827	Ghi.18006	3.50656	0	gb:DT458827 /DB_XREF=gi:73849807 /DB_XREF=GH_ON36L16.f /CLONE=GH_ON36L16 /TID=GhiAffx.21968.2 /CNT=3 /FEA=EST /TIER=ConsEnd /STK=0 /NOTE=sequence(s) not in UniGene /REP_ORG=G. hirsutum
Ghi.5727.1.A1_at	DT046456	Ghi.8740	3.50622	0	gb:DT046456 /DB_XREF=gi:72267816 /DB_XREF=COT_AB_A12 /TID=Ghi.5727.1 /CNT=2 /FEA=EST /TIER=ConsEnd /STK=1 /UG=Ghi.5727 /UG_TITLE=Transcribed locus, weakly similar to NP_193090.1 unknown protein (Arabidopsis thaliana) /REP_ORG=G. hirsutum
GraAffx.8216.1.S1_at	CO091872	---	3.5059	0	gb:CO091872 /DB_XREF=gi:48790558 /DB_XREF=GR__Ea12J11.r /CLONE=GR__Ea12J11 /TID=GraAffx.8216.1 /CNT=2 /FEA=EST /TIER=ConsEnd /STK=1 /NOTE=sequence(s) not in UniGene /REP_ORG=G. raimondii
Ghi.3635.2.A1_at	DT462650	Ghi.3635	3.50583	0	gb:DT462650 /DB_XREF=gi:73859911 /DB_XREF=GH_CHX12G12.r /CLONE=GH_CHX12G12 /TID=Ghi.3635.2 /CNT=3 /FEA=EST /TIER=ConsEnd /STK=0 /UG=Ghi.3635 /UG_TITLE=Transcribed locus, moderately similar to NP_569040.1 MAPKKK5; ATP binding kinase protein kinase protein serinethreonine kinase protein-tyrosine kinase (Arabidopsis thaliana) /REP_ORG=G. hirsutum
Ghi.7544.2.S1_s_at	DR462222	Ghi.7544	3.50553	0	gb:DR462222 /DB_XREF=gi:84173574 /DB_XREF=CM105F10 /TID=Ghi.7544.2 /CNT=1 /FEA=EST /TIER=ConsEnd /STK=0 /UG=Ghi.7544 /UG_TITLE=Transcribed locus, weakly similar to NP_193550.1 KCO6; outward rectifier potassium channel (Arabidopsis thaliana) /REP_ORG=G. hirsutum
GhiAffx.24594.1.S1_at	DT466937	Ghi.13547	3.50362	0	gb:DT466937 /DB_XREF=gi:73864198 /DB_XREF=GH_CHX19K07.r /CLONE=GH_CHX19K07 /TID=GhiAffx.24594.1 /CNT=4 /FEA=EST /TIER=ConsEnd /STK=1 /NOTE=sequence(s) not in UniGene /REP_ORG=G. hirsutum
GhiAffx.42249.1.S1_s_at	DW232044.1	---	3.50352	0	gb:DW232044.1 dbest_id:34836210 /TID=GhiAffx.42249.1 /CNT=2 /FEA=EST /TIER=ConsEnd /STK=1 /NOTE=sequence(s) not in UniGene /REP_ORG=
Gra.308.1.A1_s_at	CO127397	Gra.308	3.49931	0	gb:CO127397 /DB_XREF=gi:48829007 /DB_XREF=GR__Eb11O23.r /CLONE=GR__Eb11O23 /TID=Gra.308.1 /CNT=2 /FEA=EST /TIER=ConsEnd /STK=1 /UG=Gra.308 /UG_TITLE=Transcribed locus /REP_ORG=G. raimondii
Ghi.9148.1.S1_at	DT463613	Ghi.9148	3.49917	0	gb:DT463613 /DB_XREF=gi:73860874 /DB_XREF=GH_CHX13N02.r /CLONE=GH_CHX13N02 /TID=Ghi.9148.1 /CNT=2 /FEA=EST /TIER=ConsEnd /STK=1 /UG=Ghi.9148 /UG_TITLE=Transcribed locus, weakly similar to NP_850397.1 unknown protein (Arabidopsis thaliana) /REP_ORG=G. hirsutum
Ghi.153.1.S1_s_at	CA992716	Ghi.153	3.49837	0	gb:CA992716 /DB_XREF=gi:31072437 /DB_XREF=pAR01-28 /TID=Ghi.153.1 /CNT=7 /FEA=EST /TIER=ConsEnd /STK=0 /UG=Ghi.153 /UG_TITLE=Transcribed locus, moderately similar to NP_177653.1 transporter (Arabidopsis thaliana) /REP_ORG=G. hirsutum
Ghi.1481.1.S1_at	DN781211	Ghi.1481	3.49655	0.00854976	gb:DN781211 /DB_XREF=gi:84149911 /DB_XREF=G.hir-Cotyledon 1739 /TID=Ghi.1481.1 /CNT=4 /FEA=EST /TIER=ConsEnd /STK=0 /UG=Ghi.1481 /UG_TITLE=Transcribed locus, weakly similar to NP_188246.1 electron carrier electron transporter iron ion binding (Arabidopsis thaliana) /REP_ORG=G. hirsutum
GhiAffx.15566.1.A1_at	DW504272.1	Ghi.21679	3.4956	0	gb:DW504272.1 dbest_id:35108700 /TID=GhiAffx.15566.1 /CNT=2 /FEA=EST /TIER=ConsEnd /STK=0 /NOTE=sequence(s) not in UniGene /REP_ORG=
GhiAffx.25757.1.S1_at	DW518095.1	Ghi.1114	3.49543	0	gb:DW518095.1 dbest_id:35123878 /TID=GhiAffx.25757.1 /CNT=3 /FEA=EST /TIER=ConsEnd /STK=1 /NOTE=sequence(s) not in UniGene /REP_ORG=
Ghi.1214.1.S1_at	DR458540	Ghi.1214	3.49529	0	gb:DR458540 /DB_XREF=gi:84169892 /DB_XREF=CM066G12 /TID=Ghi.1214.1 /CNT=2 /FEA=EST /TIER=ConsEnd /STK=1 /UG=Ghi.1214 /UG_TITLE=Transcribed locus /REP_ORG=G. hirsutum
GhiAffx.7727.1.A1_at	DW515075.1	---	3.49354	0	gb:DW515075.1 dbest_id:35120858 /TID=GhiAffx.7727.1 /CNT=2 /FEA=EST /TIER=ConsEnd /STK=1 /NOTE=sequence(s) not in UniGene /REP_ORG=
Ghi.177.1.A1_at	DR462033	Ghi.177	3.49313	0	gb:DR462033 /DB_XREF=gi:84173385 /DB_XREF=CM103G01 /TID=Ghi.177.1 /CNT=1 /FEA=EST /TIER=ConsEnd /STK=1 /UG=Ghi.177 /UG_TITLE=Transcribed locus /REP_ORG=G. hirsutum
GhiAffx.12704.1.S1_at	DT466515	Ghi.9793	3.4892	0	gb:DT466515 /DB_XREF=gi:73863776 /DB_XREF=GH_CHX18P19.r /CLONE=GH_CHX18P19 /TID=GhiAffx.12704.1 /CNT=2 /FEA=EST /TIER=ConsEnd /STK=0 /NOTE=sequence(s) not in UniGene /REP_ORG=G. hirsutum
Ghi.4792.1.A1_at	DT050516	Ghi.4792	3.48916	0	gb:DT050516 /DB_XREF=gi:72276200 /DB_XREF=COT_EA_D02 /TID=Ghi.4792.1 /CNT=3 /FEA=EST /TIER=ConsEnd /STK=3 /UG=Ghi.4792 /UG_TITLE=Transcribed locus /REP_ORG=G. hirsutum
GraAffx.26955.1.S1_s_at	CO090727	---	3.48859	0	gb:CO090727 /DB_XREF=gi:48789413 /DB_XREF=GR__Ea10N16.r /CLONE=GR__Ea10N16 /TID=GraAffx.26955.1 /CNT=2 /FEA=EST /TIER=ConsEnd /STK=1 /NOTE=sequence(s) not in UniGene /REP_ORG=G. raimondii
Ghi.4468.1.S1_s_at	DT052759	Ghi.4468	3.48795	0	gb:DT052759 /DB_XREF=gi:72281009 /DB_XREF=COT_FG_D11 /TID=Ghi.4468.1 /CNT=2 /FEA=EST /TIER=ConsEnd /STK=1 /UG=Ghi.4468 /UG_TITLE=Transcribed locus, strongly similar to NP_194222.1 protein translocase (Arabidopsis thaliana) /REP_ORG=G. hirsutum
Ghi.7949.1.S1_s_at	AF336279.1	Ghi.7949	3.48765	0	gb:AF336279.1 /DB_XREF=gi:13346179 /GEN=ghdel61 /TID=Ghi.7949.1 /CNT=2 /FEA=FLmRNA /TIER=FL /STK=1 /UG=Ghi.7949 /DEF=Gossypium hirsutum GHDEL61 (ghdel61) mRNA, complete cds. /PROD=GHDEL61 /FL=gb:AF336279.1 /REP_ORG=G. hirsutum
GhiAffx.13036.1.S1_x_at	DW503030.1	Ghi.2864	3.48737	0	gb:DW503030.1 dbest_id:35107458 /TID=GhiAffx.13036.1 /CNT=8 /FEA=EST /TIER=ConsEnd /STK=1 /NOTE=sequence(s) not in UniGene /REP_ORG=
Ghi.5949.1.S1_at	CO498010	Ghi.5949	3.4864	0	gb:CO498010 /DB_XREF=gi:54122501 /DB_XREF=G.h.fbr-sw07400 /TID=Ghi.5949.1 /CNT=1 /FEA=EST /TIER=ConsEnd /STK=0 /UG=Ghi.5949 /UG_TITLE=Transcribed locus /REP_ORG=G. hirsutum
GhiAffx.56524.1.S1_at	DW488554.1	Ghi.21335	3.48434	0	gb:DW488554.1 dbest_id:35092982 /TID=GhiAffx.56524.1 /CNT=2 /FEA=EST /TIER=ConsEnd /STK=0 /NOTE=sequence(s) not in UniGene /REP_ORG=
Ghi.3791.1.A1_s_at	DT465460	Ghi.3791	3.48341	0	gb:DT465460 /DB_XREF=gi:73862721 /DB_XREF=GH_CHX17G10.r /CLONE=GH_CHX17G10 /TID=Ghi.3791.1 /CNT=4 /FEA=EST /TIER=ConsEnd /STK=1 /UG=Ghi.3791 /UG_TITLE=Transcribed locus, moderately similar to NP_180618.2 protein binding (Arabidopsis thaliana) /REP_ORG=G. hirsutum
GraAffx.14395.1.S1_s_at	CO127878	---	3.48105	0	gb:CO127878 /DB_XREF=gi:48829488 /DB_XREF=GR__Eb12K21.r /CLONE=GR__Eb12K21 /TID=GraAffx.14395.1 /CNT=3 /FEA=EST /TIER=ConsEnd /STK=1 /NOTE=sequence(s) not in UniGene /REP_ORG=G. raimondii
GhiAffx.28270.1.S1_at	DW483597.1	Ghi.12206	3.48024	0	gb:DW483597.1 dbest_id:35088025 /TID=GhiAffx.28270.1 /CNT=5 /FEA=EST /TIER=ConsEnd /STK=0 /NOTE=sequence(s) not in UniGene /REP_ORG=
GraAffx.28867.1.A1_s_at	CO070845	---	3.48011	0	gb:CO070845 /DB_XREF=gi:48740326 /DB_XREF=GR__Ea28B11.r /CLONE=GR__Ea28B11 /TID=GraAffx.28867.1 /CNT=6 /FEA=EST /TIER=ConsEnd /STK=2 /NOTE=sequence(s) not in UniGene /REP_ORG=G. raimondii
Ghi.3208.1.A1_s_at	DT468426	Ghi.3208	3.47556	0	gb:DT468426 /DB_XREF=gi:73865688 /DB_XREF=GH_CHX21N17.r /CLONE=GH_CHX21N17 /TID=Ghi.3208.1 /CNT=1 /FEA=EST /TIER=ConsEnd /STK=1 /UG=Ghi.3208 /UG_TITLE=Transcribed locus, moderately similar to NP_201554.1 peptidyl-prolyl cis-trans isomerase ubiquitin-protein ligase (Arabidopsis thaliana) /REP_ORG=G. hirsutum
Ghi.5259.1.A1_x_at	DT048446	Ghi.8208	3.47423	0	gb:DT048446 /DB_XREF=gi:72272011 /DB_XREF=COT_DA_F06 /TID=Ghi.5259.1 /CNT=1 /FEA=EST /TIER=ConsEnd /STK=1 /UG=Ghi.5259 /UG_TITLE=Transcribed locus, moderately similar to NP_196361.1 GDH2 (GLUTAMATE DEHYDROGENASE 2); oxidoreductase (Arabidopsis thaliana) /REP_ORG=G. hirsutum
Ghi.1987.1.S1_a_at	DR461896	Ghi.1987	3.47412	0.257021	gb:DR461896 /DB_XREF=gi:84173248 /DB_XREF=CM102C07 /TID=Ghi.1987.1 /CNT=3 /FEA=EST /TIER=ConsEnd /STK=0 /UG=Ghi.1987 /UG_TITLE=Transcribed locus, moderately similar to NP_566652.1 unknown protein (Arabidopsis thaliana) /REP_ORG=G. hirsutum
Ghi.8688.1.S1_s_at	DT462902	Ghi.13328	3.47117	0	gb:DT462902 /DB_XREF=gi:73860163 /DB_XREF=GH_CHX12M08.f /CLONE=GH_CHX12M08 /TID=Ghi.8688.1 /CNT=3 /FEA=EST /TIER=ConsEnd /STK=0 /UG=Ghi.8688 /UG_TITLE=Transcribed locus /REP_ORG=G. hirsutum
Ghi.5439.1.A1_s_at	DT047747	Ghi.5439	3.46453	0	gb:DT047747 /DB_XREF=gi:72270625 /DB_XREF=COT_CR_H01 /TID=Ghi.5439.1 /CNT=1 /FEA=EST /TIER=ConsEnd /STK=0 /UG=Ghi.5439 /UG_TITLE=Transcribed locus /REP_ORG=G. hirsutum
Ghi.37.1.S1_at	DR463461	Ghi.37	3.46447	0	gb:DR463461 /DB_XREF=gi:84174813 /DB_XREF=CM118F12 /TID=Ghi.37.1 /CNT=1 /FEA=EST /TIER=ConsEnd /STK=0 /UG=Ghi.37 /UG_TITLE=Transcribed locus /REP_ORG=G. hirsutum
Ghi.6020.1.A1_s_at	CO496343	Ghi.6020	3.46389	0	gb:CO496343 /DB_XREF=gi:54120834 /DB_XREF=G.h.fbr-sw05733 /TID=Ghi.6020.1 /CNT=12 /FEA=EST /TIER=ConsEnd /STK=0 /UG=Ghi.6020 /UG_TITLE=Transcribed locus, moderately similar to NP_567574.1 ATP binding kinase protein kinase protein serinethreonine kinase protein-tyrosine kinase (Arabidopsis thaliana) /REP_ORG=G. hirsutum
Ghi.9162.3.A1_at	DR463316	Ghi.9162	3.46379	0	gb:DR463316 /DB_XREF=gi:84174668 /DB_XREF=CM117B05 /TID=Ghi.9162.3 /CNT=3 /FEA=EST /TIER=ConsEnd /STK=0 /UG=Ghi.9162 /UG_TITLE=Transcribed locus /REP_ORG=G. hirsutum
Ghi.8064.1.S1_a_at	AY138250.1	Ghi.8064	3.461	0	gb:AY138250.1 /DB_XREF=gi:22795061 /TID=Ghi.8064.1 /CNT=10 /FEA=FLmRNA /TIER=FL /STK=1 /UG=Ghi.8064 /DEF=Gossypium hirsutum phospholipase D beta 1 isoform 1b mRNA, complete cds. /PROD=phospholipase D beta 1 isoform 1b /FL=gb:AY138250.1 /REP_ORG=G. hirsutum
Ghi.3255.2.S1_at	DT467969	Ghi.3255	3.45999	0	gb:DT467969 /DB_XREF=gi:73865231 /DB_XREF=GH_CHX21D10.f /CLONE=GH_CHX21D10 /TID=Ghi.3255.2 /CNT=2 /FEA=EST /TIER=ConsEnd /STK=0 /UG=Ghi.3255 /UG_TITLE=Transcribed locus, moderately similar to NP_179466.1 ATP binding ATP-dependent helicase DNA binding helicase nucleic acid binding (Arabidopsis thaliana) /REP_ORG=G. hirsutum
Ghi.4280.1.S1_at	DN760162	Ghi.4280	3.45484	0	gb:DN760162 /DB_XREF=gi:84145920 /DB_XREF=G.hir-stem 2669 /TID=Ghi.4280.1 /CNT=2 /FEA=EST /TIER=ConsEnd /STK=0 /UG=Ghi.4280 /UG_TITLE=Transcribed locus /REP_ORG=G. hirsutum
GhiAffx.50377.2.A1_at	DT458478	---	3.45425	0	gb:DT458478 /DB_XREF=gi:73849458 /DB_XREF=GH_ON36D09.r /CLONE=GH_ON36D09 /TID=GhiAffx.50377.2 /CNT=2 /FEA=EST /TIER=ConsEnd /STK=0 /NOTE=sequence(s) not in UniGene /REP_ORG=G. hirsutum
Gra.2665.1.S1_s_at	CO085549	Gra.2665	3.45314	0	gb:CO085549 /DB_XREF=gi:48776183 /DB_XREF=GR__Ea02M13.r /CLONE=GR__Ea02M13 /TID=Gra.2665.1 /CNT=2 /FEA=EST /TIER=ConsEnd /STK=1 /UG=Gra.2665 /UG_TITLE=Transcribed locus, weakly similar to NP_567545.1 expressed protein (Arabidopsis thaliana) /REP_ORG=G. raimondii
Gra.2239.1.S1_s_at	CO092078	Gra.2239	3.45206	0	gb:CO092078 /DB_XREF=gi:48790764 /DB_XREF=GR__Ea12O13.r /CLONE=GR__Ea12O13 /TID=Gra.2239.1 /CNT=4 /FEA=EST /TIER=ConsEnd /STK=1 /UG=Gra.2239 /UG_TITLE=Transcribed locus, strongly similar to NP_181241.1 phenylalanine ammonia-lyase 1 (PAL1) (Arabidopsis thaliana) /REP_ORG=G. raimondii
Ghi.7171.1.A1_at	DT461933	Ghi.7171	3.45143	0	gb:DT461933 /DB_XREF=gi:73859194 /DB_XREF=GH_CHX06E09.x /CLONE=GH_CHX06E09 /TID=Ghi.7171.1 /CNT=3 /FEA=EST /TIER=ConsEnd /STK=0 /UG=Ghi.7171 /UG_TITLE=Transcribed locus /REP_ORG=G. hirsutum
Ghi.4715.1.A1_at	DT051251	Ghi.4715	3.4505	0	gb:DT051251 /DB_XREF=gi:72277758 /DB_XREF=COT_EJ_G09 /TID=Ghi.4715.1 /CNT=6 /FEA=EST /TIER=ConsEnd /STK=4 /UG=Ghi.4715 /UG_TITLE=Transcribed locus /REP_ORG=G. hirsutum
Ghi.906.1.S1_at	DR453362	Ghi.906	3.45028	0	gb:DR453362 /DB_XREF=gi:84164714 /DB_XREF=CM012D07 /TID=Ghi.906.1 /CNT=1 /FEA=EST /TIER=ConsEnd /STK=0 /UG=Ghi.906 /UG_TITLE=Transcribed locus /REP_ORG=G. hirsutum
GhiAffx.42751.1.S1_at	DW509655.1	---	3.4499	0	gb:DW509655.1 dbest_id:35115438 /TID=GhiAffx.42751.1 /CNT=2 /FEA=EST /TIER=ConsEnd /STK=1 /NOTE=sequence(s) not in UniGene /REP_ORG=
GhiAffx.34897.1.S1_at	DW509782.1	---	3.44877	0	gb:DW509782.1 dbest_id:35115565 /TID=GhiAffx.34897.1 /CNT=2 /FEA=EST /TIER=ConsEnd /STK=1 /NOTE=sequence(s) not in UniGene /REP_ORG=
Ghi.1910.1.S1_at	DV849247	Ghi.1910	3.4487	0	gb:DV849247 /DB_XREF=gi:82755685 /DB_XREF=GH_LSL08G09.f /CLONE=GH_LSL08G09 /TID=Ghi.1910.1 /CNT=1 /FEA=EST /TIER=ConsEnd /STK=1 /UG=Ghi.1910 /UG_TITLE=Transcribed locus /REP_ORG=G. hirsutum
Ghi.5684.1.A1_at	DT046780	Ghi.5684	3.4475	0	gb:DT046780 /DB_XREF=gi:72268504 /DB_XREF=COT_CC_E08 /TID=Ghi.5684.1 /CNT=1 /FEA=EST /TIER=ConsEnd /STK=0 /UG=Ghi.5684 /UG_TITLE=Transcribed locus, weakly similar to NP_187029.2 binding (Arabidopsis thaliana) /REP_ORG=G. hirsutum
GhiAffx.47674.1.S1_at	DW238463.1	Ghi.12933	3.44706	0	gb:DW238463.1 dbest_id:34842629 /TID=GhiAffx.47674.1 /CNT=3 /FEA=EST /TIER=ConsEnd /STK=0 /NOTE=sequence(s) not in UniGene /REP_ORG=
Ghi.2294.4.S1_s_at	DT464189	Ghi.17773	3.44592	0	gb:DT464189 /DB_XREF=gi:73861450 /DB_XREF=GH_CHX15D04.f /CLONE=GH_CHX15D04 /TID=Ghi.2294.4 /CNT=3 /FEA=EST /TIER=ConsEnd /STK=0 /UG=Ghi.2294 /UG_TITLE=Transcribed locus, strongly similar to NP_176768.1 isocitrate dehydrogenase (NADP+) oxidoreductase (Arabidopsis thaliana) /REP_ORG=G. hirsutum
GhiAffx.40107.1.S1_s_at	DW496119.1	Ghi.10503	3.44578	0.521504	gb:DW496119.1 dbest_id:35100547 /TID=GhiAffx.40107.1 /CNT=3 /FEA=EST /TIER=ConsEnd /STK=1 /NOTE=sequence(s) not in UniGene /REP_ORG=
GhiAffx.26316.1.S1_at	DW504941.1	Ghi.15676	3.44568	0	gb:DW504941.1 dbest_id:35110724 /TID=GhiAffx.26316.1 /CNT=6 /FEA=EST /TIER=ConsEnd /STK=0 /NOTE=sequence(s) not in UniGene /REP_ORG=
GhiAffx.34031.1.S1_s_at	DW476196.1	Ghi.14215	3.44567	0	gb:DW476196.1 dbest_id:35080624 /TID=GhiAffx.34031.1 /CNT=6 /FEA=EST /TIER=ConsEnd /STK=0 /NOTE=sequence(s) not in UniGene /REP_ORG=
GhiAffx.7519.1.S1_s_at	DW512530.1	Ghi.12958	3.43253	0	gb:DW512530.1 dbest_id:35118313 /TID=GhiAffx.7519.1 /CNT=5 /FEA=EST /TIER=ConsEnd /STK=0 /NOTE=sequence(s) not in UniGene /REP_ORG=
Gra.2985.2.S1_s_at	CO088756	Gra.97	3.43173	0.00854976	gb:CO088756 /DB_XREF=gi:48779390 /DB_XREF=GR__Ea07O05.r /CLONE=GR__Ea07O05 /TID=Gra.2985.2 /CNT=3 /FEA=EST /TIER=ConsEnd /STK=1 /UG=Gra.2985 /UG_TITLE=Transcribed locus, weakly similar to XP_470614.1 Putative Squalene monooxygenase (Oryza sativa (japonica cultivar-group)) /REP_ORG=G. raimondii
Ghi.5393.1.A1_at	DT047935	Ghi.5393	3.42932	0	gb:DT047935 /DB_XREF=gi:72270998 /DB_XREF=COT_CU_C01 /TID=Ghi.5393.1 /CNT=1 /FEA=EST /TIER=ConsEnd /STK=1 /UG=Ghi.5393 /UG_TITLE=Transcribed locus, moderately similar to NP_199787.2 kinase (Arabidopsis thaliana) /REP_ORG=G. hirsutum
Ghi.3576.1.S1_s_at	DT464151	Ghi.3576	3.42646	0	gb:DT464151 /DB_XREF=gi:73861412 /DB_XREF=GH_CHX15B24.r /CLONE=GH_CHX15B24 /TID=Ghi.3576.1 /CNT=3 /FEA=EST /TIER=ConsEnd /STK=1 /UG=Ghi.3576 /UG_TITLE=Transcribed locus /REP_ORG=G. hirsutum
Gra.2721.2.S1_at	CO080072	Gra.2721	3.41824	0	gb:CO080072 /DB_XREF=gi:48749553 /DB_XREF=GR__Ea43E20.f /CLONE=GR__Ea43E20 /TID=Gra.2721.2 /CNT=4 /FEA=EST /TIER=ConsEnd /STK=0 /UG=Gra.2721 /UG_TITLE=Transcribed locus, weakly similar to XP_480293.1 unknown protein (Oryza sativa (japonica cultivar-group)) /REP_ORG=G. raimondii
Ghi.4190.1.A1_at	DT456935	Ghi.4190	3.4176	0	gb:DT456935 /DB_XREF=gi:73847915 /DB_XREF=GH_ON33L13.r /CLONE=GH_ON33L13 /TID=Ghi.4190.1 /CNT=3 /FEA=EST /TIER=ConsEnd /STK=1 /UG=Ghi.4190 /UG_TITLE=Transcribed locus /REP_ORG=G. hirsutum
GhiAffx.60604.1.S1_s_at	DW500449.1	Ghi.15916	3.41651	0	gb:DW500449.1 dbest_id:35104877 /TID=GhiAffx.60604.1 /CNT=7 /FEA=EST /TIER=ConsEnd /STK=0 /NOTE=sequence(s) not in UniGene /REP_ORG=
GraAffx.3071.1.A1_at	CO117943	---	3.41473	0	gb:CO117943 /DB_XREF=gi:48816630 /DB_XREF=GR__Eb020A17.r /CLONE=GR__Eb020A17 /TID=GraAffx.3071.1 /CNT=2 /FEA=EST /TIER=ConsEnd /STK=1 /NOTE=sequence(s) not in UniGene /REP_ORG=G. raimondii
GhiAffx.26204.1.A1_at	DW520608.1	Ghi.22092	3.41265	0	gb:DW520608.1 dbest_id:35126391 /TID=GhiAffx.26204.1 /CNT=2 /FEA=EST /TIER=ConsEnd /STK=1 /NOTE=sequence(s) not in UniGene /REP_ORG=
GhiAffx.3083.73.S1_at	AJ513023	---	3.4115	0	gb:AJ513023 /DB_XREF=gi:24976505 /DB_XREF=AJ513023 /CLONE=su124d08r3 /TID=GhiAffx.3083.73 /CNT=2 /FEA=EST /TIER=ConsEnd /STK=0 /NOTE=sequence(s) not in UniGene /REP_ORG=G. hirsutum
Ghi.4468.1.A1_s_at	DR463750	Ghi.4468	3.41005	0	gb:DR463750 /DB_XREF=gi:84175102 /DB_XREF=CM121G03 /TID=Ghi.4468.1 /CNT=2 /FEA=EST /TIER=ConsEnd /STK=0 /UG=Ghi.4468 /UG_TITLE=Transcribed locus, strongly similar to NP_194222.1 protein translocase (Arabidopsis thaliana) /REP_ORG=G. hirsutum
GhiAffx.23286.1.S1_at	DW497785.1	Ghi.5427	3.40835	0	gb:DW497785.1 dbest_id:35102213 /TID=GhiAffx.23286.1 /CNT=6 /FEA=EST /TIER=ConsEnd /STK=1 /NOTE=sequence(s) not in UniGene /REP_ORG=
GhiAffx.6049.1.A1_at	DW495846.1	---	3.40826	0.0333442	gb:DW495846.1 dbest_id:35100274 /TID=GhiAffx.6049.1 /CNT=2 /FEA=EST /TIER=ConsEnd /STK=1 /NOTE=sequence(s) not in UniGene /REP_ORG=
Ghi.4286.1.S1_at	DT455843	Ghi.4286	3.40788	0	gb:DT455843 /DB_XREF=gi:73846823 /DB_XREF=GH_ON04D02.f /CLONE=GH_ON04D02 /TID=Ghi.4286.1 /CNT=1 /FEA=EST /TIER=ConsEnd /STK=0 /UG=Ghi.4286 /UG_TITLE=Transcribed locus /REP_ORG=G. hirsutum
GhiAffx.32176.1.A1_s_at	DT048308	Ghi.19186	3.40337	0	gb:DT048308 /DB_XREF=gi:72271736 /DB_XREF=COT_CZ_A10 /TID=GhiAffx.32176.1 /CNT=2 /FEA=EST /TIER=ConsEnd /STK=0 /NOTE=sequence(s) not in UniGene /REP_ORG=G. hirsutum
Ghi.9943.1.S1_at	DT459686	Ghi.9943	3.40182	0	gb:DT459686 /DB_XREF=gi:73850666 /DB_XREF=GH_ON38B03.r /CLONE=GH_ON38B03 /TID=Ghi.9943.1 /CNT=2 /FEA=EST /TIER=ConsEnd /STK=1 /UG=Ghi.9943 /UG_TITLE=Transcribed locus /REP_ORG=G. hirsutum
GhiAffx.14568.1.S1_at	DT467448	Ghi.19650	3.39711	0	gb:DT467448 /DB_XREF=gi:73864709 /DB_XREF=GH_CHX20G23.r /CLONE=GH_CHX20G23 /TID=GhiAffx.14568.1 /CNT=2 /FEA=EST /TIER=ConsEnd /STK=1 /NOTE=sequence(s) not in UniGene /REP_ORG=G. hirsutum
Ghi.10563.1.S1_s_at	DR463261	Ghi.10563	3.39693	0	gb:DR463261 /DB_XREF=gi:84174613 /DB_XREF=CM116E09 /TID=Ghi.10563.1 /CNT=9 /FEA=EST /TIER=ConsEnd /STK=0 /UG=Ghi.10563 /UG_TITLE=Transcribed locus, moderately similar to NP_565937.1 binding (Arabidopsis thaliana) /REP_ORG=G. hirsutum
Ghi.6731.1.A1_at	CA993440	Ghi.6731	3.3944	0	gb:CA993440 /DB_XREF=gi:31073161 /DB_XREF=pAR07G03 /TID=Ghi.6731.1 /CNT=1 /FEA=EST /TIER=ConsEnd /STK=0 /UG=Ghi.6731 /UG_TITLE=Transcribed locus /REP_ORG=G. hirsutum
Ghi.1726.1.S1_at	DN759675	Ghi.1726	3.39171	0	gb:DN759675 /DB_XREF=gi:84145433 /DB_XREF=G.hir-stem 2179 /TID=Ghi.1726.1 /CNT=2 /FEA=EST /TIER=ConsEnd /STK=0 /UG=Ghi.1726 /UG_TITLE=Transcribed locus, moderately similar to NP_568545.1 unknown protein (Arabidopsis thaliana) /REP_ORG=G. hirsutum
GhiAffx.9950.1.A1_at	DW223847.1	Ghi.6348	3.38939	0	gb:DW223847.1 dbest_id:34828019 /TID=GhiAffx.9950.1 /CNT=3 /FEA=EST /TIER=ConsEnd /STK=2 /NOTE=sequence(s) not in UniGene /REP_ORG=
Ghi.7912.3.S1_at	CD485645	Ghi.7912	3.38917	0	gb:CD485645 /DB_XREF=gi:31406610 /DB_XREF=CFUS10.2E11 /CLONE=CFUS10.2E11 /TID=Ghi.7912.3 /CNT=5 /FEA=EST /TIER=ConsEnd /STK=0 /UG=Ghi.7912 /UG_TITLE=Transcribed locus, moderately similar to NP_172291.1 calmodulin binding lactoylglutathione lyase (Arabidopsis thaliana) /REP_ORG=G. hirsutum
Ghi.6547.1.S1_s_at	DR458804	---	3.38829	0	gb:DR458804 /DB_XREF=gi:84170156 /DB_XREF=CM069F03 /TID=Ghi.6547.1 /CNT=3 /FEA=EST /TIER=ConsEnd /STK=0 /UG=Ghi.6547 /UG_TITLE=Transcribed locus, weakly similar to NP_192968.3 CYP706A5; heme binding iron ion binding monooxygenase oxygen binding (Arabidopsis thaliana) /REP_ORG=G. hirsutum
Ghi.984.2.A1_at	DT458472	Ghi.984	3.38173	0	gb:DT458472 /DB_XREF=gi:73849452 /DB_XREF=GH_ON36D05.r /CLONE=GH_ON36D05 /TID=Ghi.984.2 /CNT=1 /FEA=EST /TIER=ConsEnd /STK=1 /UG=Ghi.984 /UG_TITLE=Transcribed locus, moderately similar to NP_177421.1 HAB1; catalytic protein phosphatase type 2C protein serinethreonine phosphatase (Arabidopsis thaliana) /REP_ORG=G. hirsutum
GhiAffx.26451.2.A1_at	DT467279	Ghi.13540	3.38145	0	gb:DT467279 /DB_XREF=gi:73864540 /DB_XREF=GH_CHX20C16.r /CLONE=GH_CHX20C16 /TID=GhiAffx.26451.2 /CNT=2 /FEA=EST /TIER=ConsEnd /STK=1 /NOTE=sequence(s) not in UniGene /REP_ORG=G. hirsutum
GhiAffx.3083.73.A1_s_at	AJ513225	---	3.37854	0	gb:AJ513225 /DB_XREF=gi:24976707 /DB_XREF=AJ513225 /CLONE=su187g05r3 /TID=GhiAffx.3083.73 /CNT=2 /FEA=EST /TIER=ConsEnd /STK=0 /NOTE=sequence(s) not in UniGene /REP_ORG=G. hirsutum
Ghi.4010.1.A1_at	DT459078	Ghi.4010	3.37813	0	gb:DT459078 /DB_XREF=gi:73850058 /DB_XREF=GH_ON37B21.r /CLONE=GH_ON37B21 /TID=Ghi.4010.1 /CNT=1 /FEA=EST /TIER=ConsEnd /STK=1 /UG=Ghi.4010 /UG_TITLE=Transcribed locus, moderately similar to NP_172558.1 unknown protein (Arabidopsis thaliana) /REP_ORG=G. hirsutum
GhiAffx.1859.1.S1_at	DT468306	---	3.3732	0.0292223	gb:DT468306 /DB_XREF=gi:73865568 /DB_XREF=GH_CHX21K24.r /CLONE=GH_CHX21K24 /TID=GhiAffx.1859.1 /CNT=2 /FEA=EST /TIER=ConsEnd /STK=1 /NOTE=sequence(s) not in UniGene /REP_ORG=G. hirsutum
GraAffx.9344.1.A1_s_at	CO086074	---	3.37189	0	gb:CO086074 /DB_XREF=gi:48776708 /DB_XREF=GR__Ea03M11.f /CLONE=GR__Ea03M11 /TID=GraAffx.9344.1 /CNT=2 /FEA=EST /TIER=ConsEnd /STK=0 /NOTE=sequence(s) not in UniGene /REP_ORG=G. raimondii
GhiAffx.59696.1.S1_at	DW500701.1	---	3.37178	0	gb:DW500701.1 dbest_id:35105129 /TID=GhiAffx.59696.1 /CNT=1 /FEA=EST /TIER=ConsEnd /STK=0 /NOTE=sequence(s) not in UniGene /REP_ORG=
GhiAffx.24480.1.S1_s_at	DW235028.1	---	3.37058	0	gb:DW235028.1 dbest_id:34839194 /TID=GhiAffx.24480.1 /CNT=3 /FEA=EST /TIER=ConsEnd /STK=0 /NOTE=sequence(s) not in UniGene /REP_ORG=
GhiAffx.31049.1.S1_at	DW233289.1	Ghi.7048	3.36838	0.0238141	gb:DW233289.1 dbest_id:34837455 /TID=GhiAffx.31049.1 /CNT=2 /FEA=EST /TIER=ConsEnd /STK=0 /NOTE=sequence(s) not in UniGene /REP_ORG=
GhiAffx.1589.36.S1_at	AW187284	Ghi.12631	3.36533	0	gb:AW187284 /DB_XREF=gi:6461720 /DB_XREF=BNLGHi12412 /TID=GhiAffx.1589.36 /CNT=4 /FEA=EST /TIER=ConsEnd /STK=0 /NOTE=sequence(s) not in UniGene /REP_ORG=G. hirsutum
GraAffx.12486.1.S1_at	CO070464	---	3.3643	0	gb:CO070464 /DB_XREF=gi:48739945 /DB_XREF=GR__Ea27I06.r /CLONE=GR__Ea27I06 /TID=GraAffx.12486.1 /CNT=2 /FEA=EST /TIER=ConsEnd /STK=1 /NOTE=sequence(s) not in UniGene /REP_ORG=G. raimondii
Ghi.6870.1.A1_x_at	CA992800	Ghi.6870	3.364	0	gb:CA992800 /DB_XREF=gi:31072521 /DB_XREF=pAR01E06 /TID=Ghi.6870.1 /CNT=1 /FEA=EST /TIER=ConsEnd /STK=0 /UG=Ghi.6870 /UG_TITLE=Transcribed locus, weakly similar to NP_915771.1 PDI-like protein (Oryza sativa (japonica cultivar-group)) /REP_ORG=G. hirsutum
Ghi.1077.1.A1_s_at	CO493091	Ghi.1077	3.36295	0.00854976	gb:CO493091 /DB_XREF=gi:54117582 /DB_XREF=G.h.fbr-sw02481 /TID=Ghi.1077.1 /CNT=4 /FEA=EST /TIER=ConsEnd /STK=0 /UG=Ghi.1077 /UG_TITLE=Transcribed locus /REP_ORG=G. hirsutum
GhiAffx.37193.1.A1_s_at	DW516055.1	Ghi.6666	3.3625	0	gb:DW516055.1 dbest_id:35121838 /TID=GhiAffx.37193.1 /CNT=2 /FEA=EST /TIER=ConsEnd /STK=1 /NOTE=sequence(s) not in UniGene /REP_ORG=
GhiAffx.23788.1.A1_at	DW507831.1	---	3.36246	0	gb:DW507831.1 dbest_id:35113614 /TID=GhiAffx.23788.1 /CNT=2 /FEA=EST /TIER=ConsEnd /STK=1 /NOTE=sequence(s) not in UniGene /REP_ORG=
GhiAffx.8571.1.S1_s_at	DT468783	---	3.36121	0	gb:DT468783 /DB_XREF=gi:73866045 /DB_XREF=GH_CHX22H01.r /CLONE=GH_CHX22H01 /TID=GhiAffx.8571.1 /CNT=2 /FEA=EST /TIER=ConsEnd /STK=1 /NOTE=sequence(s) not in UniGene /REP_ORG=G. hirsutum
GhiAffx.43795.1.S1_at	DW518592.1	---	3.35899	0	gb:DW518592.1 dbest_id:35124375 /TID=GhiAffx.43795.1 /CNT=2 /FEA=EST /TIER=ConsEnd /STK=0 /NOTE=sequence(s) not in UniGene /REP_ORG=
GhiAffx.64051.1.A1_at	DW243284.1	Ghi.18959	3.35766	0	gb:DW243284.1 dbest_id:34847450 /TID=GhiAffx.64051.1 /CNT=2 /FEA=EST /TIER=ConsEnd /STK=2 /NOTE=sequence(s) not in UniGene /REP_ORG=
Ghi.3970.1.A1_at	DT459594	Ghi.3970	3.35612	0	gb:DT459594 /DB_XREF=gi:73850574 /DB_XREF=GH_ON37O14.r /CLONE=GH_ON37O14 /TID=Ghi.3970.1 /CNT=1 /FEA=EST /TIER=ConsEnd /STK=1 /UG=Ghi.3970 /UG_TITLE=Transcribed locus, weakly similar to NP_565659.1 unknown protein (Arabidopsis thaliana) /REP_ORG=G. hirsutum
Ghi.5044.1.A1_s_at	DT049309	Ghi.42	3.35467	0	gb:DT049309 /DB_XREF=gi:72273745 /DB_XREF=COT_DL_C06 /TID=Ghi.5044.1 /CNT=1 /FEA=EST /TIER=ConsEnd /STK=1 /UG=Ghi.5044 /UG_TITLE=Transcribed locus /REP_ORG=G. hirsutum
Ghi.3287.1.A1_s_at	DT467636	Ghi.3287	3.35429	0	gb:DT467636 /DB_XREF=gi:73864897 /DB_XREF=GH_CHX20L14.r /CLONE=GH_CHX20L14 /TID=Ghi.3287.1 /CNT=1 /FEA=EST /TIER=ConsEnd /STK=1 /UG=Ghi.3287 /UG_TITLE=Transcribed locus, weakly similar to NP_178158.2 transcription coactivator (Arabidopsis thaliana) /REP_ORG=G. hirsutum
Ghi.9312.1.A1_s_at	DT460493	Ghi.9312	3.35406	0	gb:DT460493 /DB_XREF=gi:73851473 /DB_XREF=GH_ON39G07.r /CLONE=GH_ON39G07 /TID=Ghi.9312.1 /CNT=3 /FEA=EST /TIER=ConsEnd /STK=1 /UG=Ghi.9312 /UG_TITLE=Transcribed locus, moderately similar to NP_197201.1 oxidoreductase zinc ion binding (Arabidopsis thaliana) /REP_ORG=G. hirsutum
Ghi.3185.2.A1_at	DT468698	Ghi.3185	3.35307	0	gb:DT468698 /DB_XREF=gi:73865960 /DB_XREF=GH_CHX22E21.r /CLONE=GH_CHX22E21 /TID=Ghi.3185.2 /CNT=2 /FEA=EST /TIER=ConsEnd /STK=1 /UG=Ghi.3185 /UG_TITLE=Transcribed locus /REP_ORG=G. hirsutum
Ghi.4844.1.S1_s_at	DT050234	Ghi.4844	3.3517	0	gb:DT050234 /DB_XREF=gi:72275640 /DB_XREF=COT_DW_H10 /TID=Ghi.4844.1 /CNT=7 /FEA=EST /TIER=ConsEnd /STK=1 /UG=Ghi.4844 /UG_TITLE=Transcribed locus, weakly similar to NP_564342.1 transcription factor transcription regulator (Arabidopsis thaliana) /REP_ORG=G. hirsutum
GhiAffx.18859.1.S1_at	DW237605.1	Ghi.15626	3.35154	0.521504	gb:DW237605.1 dbest_id:34841771 /TID=GhiAffx.18859.1 /CNT=7 /FEA=EST /TIER=ConsEnd /STK=1 /NOTE=sequence(s) not in UniGene /REP_ORG=
GhiAffx.51913.1.S1_a_at	DW230222.1	---	3.35066	0	gb:DW230222.1 dbest_id:34834394 /TID=GhiAffx.51913.1 /CNT=4 /FEA=EST /TIER=ConsEnd /STK=1 /NOTE=sequence(s) not in UniGene /REP_ORG=
Ghi.1245.2.S1_s_at	DV849563	Ghi.14598	3.34859	0	gb:DV849563 /DB_XREF=gi:82756001 /DB_XREF=GH_LSL21H11.f /CLONE=GH_LSL21H11 /TID=Ghi.1245.2 /CNT=3 /FEA=EST /TIER=ConsEnd /STK=0 /UG=Ghi.1245 /UG_TITLE=Transcribed locus, moderately similar to NP_565864.1 SLT1 (SODIUM- AND LITHIUM-TOLERANT 1) (Arabidopsis thaliana) /REP_ORG=G. hirsutum
Ghi.8075.2.S1_s_at	AF530913.1	Ghi.17123	3.34854	0	gb:AF530913.1 /DB_XREF=gi:22475194 /TID=Ghi.8075.2 /CNT=1 /FEA=FLmRNA /TIER=FL /STK=1 /UG=Ghi.8075 /DEF=Gossypium hirsutum homeodomain protein GhHOX1 mRNA, complete cds. /PROD=homeodomain protein GhHOX1 /FL=gb:AF530913.1 /REP_ORG=G. hirsutum
GhiAffx.60203.1.S1_at	DW503147.1	---	3.34751	0	gb:DW503147.1 dbest_id:35107575 /TID=GhiAffx.60203.1 /CNT=2 /FEA=EST /TIER=ConsEnd /STK=1 /NOTE=sequence(s) not in UniGene /REP_ORG=
GhiAffx.16995.1.S1_at	DW517756.1	Ghi.14751	3.34669	0	gb:DW517756.1 dbest_id:35123539 /TID=GhiAffx.16995.1 /CNT=6 /FEA=EST /TIER=ConsEnd /STK=1 /NOTE=sequence(s) not in UniGene /REP_ORG=
Ghi.7031.1.A1_at	DT467436	Ghi.7031	3.3465	0	gb:DT467436 /DB_XREF=gi:73864697 /DB_XREF=GH_CHX20G15.r /CLONE=GH_CHX20G15 /TID=Ghi.7031.1 /CNT=3 /FEA=EST /TIER=ConsEnd /STK=1 /UG=Ghi.7031 /UG_TITLE=Transcribed locus /REP_ORG=G. hirsutum
Ghi.8893.1.S1_at	DT456517	Ghi.8893	3.34602	0	gb:DT456517 /DB_XREF=gi:73847497 /DB_XREF=GH_ON16G09.f /CLONE=GH_ON16G09 /TID=Ghi.8893.1 /CNT=5 /FEA=EST /TIER=ConsEnd /STK=0 /UG=Ghi.8893 /UG_TITLE=Transcribed locus /REP_ORG=G. hirsutum
GhiAffx.59595.1.S1_s_at	DW500144.1	Ghi.17043	3.34416	0	gb:DW500144.1 dbest_id:35104572 /TID=GhiAffx.59595.1 /CNT=4 /FEA=EST /TIER=ConsEnd /STK=1 /NOTE=sequence(s) not in UniGene /REP_ORG=
GhiAffx.20617.1.S1_at	DW494814.1	Ghi.18424	3.34209	0	gb:DW494814.1 dbest_id:35099242 /TID=GhiAffx.20617.1 /CNT=6 /FEA=EST /TIER=ConsEnd /STK=0 /NOTE=sequence(s) not in UniGene /REP_ORG=
Ghi.10550.1.S1_s_at	DN758412	Ghi.10550	3.34095	0	gb:DN758412 /DB_XREF=gi:84144170 /DB_XREF=G.hir-stem 916 /TID=Ghi.10550.1 /CNT=5 /FEA=EST /TIER=ConsEnd /STK=0 /UG=Ghi.10550 /UG_TITLE=Transcribed locus, weakly similar to NP_191786.1 anion exchanger (Arabidopsis thaliana) /REP_ORG=G. hirsutum
GhiAffx.25661.1.S1_at	DW517516.1	Ghi.11202	3.34051	0	gb:DW517516.1 dbest_id:35123299 /TID=GhiAffx.25661.1 /CNT=3 /FEA=EST /TIER=ConsEnd /STK=0 /NOTE=sequence(s) not in UniGene /REP_ORG=
Ghi.6449.1.A1_at	CK640602	Ghi.6449	3.33877	0	gb:CK640602 /DB_XREF=gi:41578597 /DB_XREF=PAR01D03 /CLONE=PAR01D03 /TID=Ghi.6449.1 /CNT=3 /FEA=EST /TIER=ConsEnd /STK=0 /UG=Ghi.6449 /UG_TITLE=Transcribed locus /REP_ORG=G. hirsutum
GhiAffx.2153.2.S1_at	CD485871	Ghi.14033	3.33835	0	gb:CD485871 /DB_XREF=gi:31406836 /DB_XREF=CFUS4.1C11 /CLONE=CFUS4.1C11 /TID=GhiAffx.2153.2 /CNT=3 /FEA=EST /TIER=ConsEnd /STK=0 /NOTE=sequence(s) not in UniGene /REP_ORG=G. hirsutum
GhiAffx.11417.1.S1_s_at	DW236331.1	Ghi.3093	3.33751	0	gb:DW236331.1 dbest_id:34840497 /TID=GhiAffx.11417.1 /CNT=2 /FEA=EST /TIER=ConsEnd /STK=1 /NOTE=sequence(s) not in UniGene /REP_ORG=
Ghi.3814.1.S1_at	DT461514	Ghi.3814	3.33735	0	gb:DT461514 /DB_XREF=gi:73858775 /DB_XREF=GH_CHX01C09.x /CLONE=GH_CHX01C09 /TID=Ghi.3814.1 /CNT=1 /FEA=EST /TIER=ConsEnd /STK=0 /UG=Ghi.3814 /UG_TITLE=Transcribed locus /REP_ORG=G. hirsutum
Ghi.7754.1.A1_at	AI727028	Ghi.7754	3.33664	0	gb:AI727028 /DB_XREF=gi:5045880 /DB_XREF=BNLGHi7179 /TID=Ghi.7754.1 /CNT=1 /FEA=EST /TIER=ConsEnd /STK=0 /UG=Ghi.7754 /UG_TITLE=Transcribed locus, weakly similar to NP_200863.2 ATP binding kinase protein kinase protein serinethreonine kinase protein-tyrosine kinase (Arabidopsis thaliana) /REP_ORG=G. hirsutum
Ghi.5478.1.A1_at	DT047590	Ghi.5478	3.3351	0	gb:DT047590 /DB_XREF=gi:72270310 /DB_XREF=COT_CP_G12 /TID=Ghi.5478.1 /CNT=1 /FEA=EST /TIER=ConsEnd /STK=0 /UG=Ghi.5478 /UG_TITLE=Transcribed locus /REP_ORG=G. hirsutum
GhiAffx.13626.1.A1_x_at	DT051771	---	3.33349	0	gb:DT051771 /DB_XREF=gi:72278915 /DB_XREF=COT_EQ_A05 /TID=GhiAffx.13626.1 /CNT=2 /FEA=EST /TIER=ConsEnd /STK=2 /NOTE=sequence(s) not in UniGene /REP_ORG=G. hirsutum
Ghi.3250.1.S1_at	DT468015	---	3.33338	0	gb:DT468015 /DB_XREF=gi:73865277 /DB_XREF=GH_CHX21E10.r /CLONE=GH_CHX21E10 /TID=Ghi.3250.1 /CNT=2 /FEA=EST /TIER=ConsEnd /STK=1 /UG=Ghi.3250 /UG_TITLE=Transcribed locus, moderately similar to NP_189492.1 ATP binding ATPase nucleoside-triphosphatase nucleotide binding (Arabidopsis thaliana) /REP_ORG=G. hirsutum
Gra.1986.1.A1_at	CO125850	Gra.1986	3.33321	0	gb:CO125850 /DB_XREF=gi:48827460 /DB_XREF=GR__Eb09J01.r /CLONE=GR__Eb09J01 /TID=Gra.1986.1 /CNT=4 /FEA=EST /TIER=ConsEnd /STK=1 /UG=Gra.1986 /UG_TITLE=Transcribed locus, strongly similar to NP_565886.1 AMP deaminase, putative myoadenylate deaminase, putative (Arabidopsis thaliana) /REP_ORG=G. raimondii
GraAffx.18858.1.A1_at	CO103857	---	3.33238	0	gb:CO103857 /DB_XREF=gi:48802543 /DB_XREF=GR__Eb0032K12.r /CLONE=GR__Eb0032K12 /TID=GraAffx.18858.1 /CNT=4 /FEA=EST /TIER=ConsEnd /STK=1 /NOTE=sequence(s) not in UniGene /REP_ORG=G. raimondii
Gra.1648.1.S1_s_at	CO116294	Gra.1648	3.32568	0.0292223	gb:CO116294 /DB_XREF=gi:48814981 /DB_XREF=GR__Eb018H21.f /CLONE=GR__Eb018H21 /TID=Gra.1648.1 /CNT=4 /FEA=EST /TIER=ConsEnd /STK=0 /UG=Gra.1648 /UG_TITLE=Transcribed locus, moderately similar to NP_191981.1 shaggy-related protein kinase theta ASK-theta (ASK8) (Arabidopsis thaliana) /REP_ORG=G. raimondii
Ghi.2264.1.A1_at	DT467902	Ghi.2264	3.32523	0	gb:DT467902 /DB_XREF=gi:73865163 /DB_XREF=GH_CHX21B19.r /CLONE=GH_CHX21B19 /TID=Ghi.2264.1 /CNT=1 /FEA=EST /TIER=ConsEnd /STK=1 /UG=Ghi.2264 /UG_TITLE=Transcribed locus, moderately similar to NP_195118.1 catalytic protein phosphatase type 2C (Arabidopsis thaliana) /REP_ORG=G. hirsutum
Ghi.8857.1.S1_at	DT456345	Ghi.8857	3.32333	0	gb:DT456345 /DB_XREF=gi:73847325 /DB_XREF=GH_ON14G01.f /CLONE=GH_ON14G01 /TID=Ghi.8857.1 /CNT=3 /FEA=EST /TIER=ConsEnd /STK=0 /UG=Ghi.8857 /UG_TITLE=Transcribed locus /REP_ORG=G. hirsutum
Ghi.6627.1.S1_at	DT460204	---	3.32331	0	gb:DT460204 /DB_XREF=gi:73851184 /DB_XREF=GH_ON38O23.r /CLONE=GH_ON38O23 /TID=Ghi.6627.1 /CNT=2 /FEA=EST /TIER=ConsEnd /STK=1 /UG=Ghi.6627 /UG_TITLE=Transcribed locus, moderately similar to NP_195985.2 SBE2.2 (STARCH BRANCHING ENZYME 2.2) (Arabidopsis thaliana) /REP_ORG=G. hirsutum
Gra.2602.1.A1_s_at	CO080178	Gra.2602	3.32329	0.0333442	gb:CO080178 /DB_XREF=gi:48749659 /DB_XREF=GR__Ea43H15.r /CLONE=GR__Ea43H15 /TID=Gra.2602.1 /CNT=3 /FEA=EST /TIER=ConsEnd /STK=2 /UG=Gra.2602 /UG_TITLE=Transcribed locus, weakly similar to NP_568607.1 expressed protein (Arabidopsis thaliana) /REP_ORG=G. raimondii
Ghi.3096.2.S1_s_at	DT464376	Ghi.3096	3.32	0	gb:DT464376 /DB_XREF=gi:73861637 /DB_XREF=GH_CHX15I17.f /CLONE=GH_CHX15I17 /TID=Ghi.3096.2 /CNT=3 /FEA=EST /TIER=ConsEnd /STK=0 /UG=Ghi.3096 /UG_TITLE=Transcribed locus, weakly similar to NP_201491.1 ATP binding (Arabidopsis thaliana) /REP_ORG=G. hirsutum
Ghi.8319.1.S1_at	DT049297	Ghi.8319	3.31855	0	gb:DT049297 /DB_XREF=gi:72273721 /DB_XREF=COT_DL_B04 /TID=Ghi.8319.1 /CNT=5 /FEA=EST /TIER=ConsEnd /STK=1 /UG=Ghi.8319 /UG_TITLE=Transcribed locus, weakly similar to NP_563668.1 unknown protein (Arabidopsis thaliana) /REP_ORG=G. hirsutum
GhiAffx.13311.1.A1_s_at	DW230892.1	Ghi.14382	3.31577	0	gb:DW230892.1 dbest_id:34835064 /TID=GhiAffx.13311.1 /CNT=3 /FEA=EST /TIER=ConsEnd /STK=1 /NOTE=sequence(s) not in UniGene /REP_ORG=
GhiAffx.5828.1.S1_s_at	DW514056.1	Ghi.11331	3.31284	0	gb:DW514056.1 dbest_id:35119839 /TID=GhiAffx.5828.1 /CNT=3 /FEA=EST /TIER=ConsEnd /STK=1 /NOTE=sequence(s) not in UniGene /REP_ORG=
GhiAffx.15534.1.S1_x_at	DW234504.1	Ghi.6639	3.30957	0	gb:DW234504.1 dbest_id:34838670 /TID=GhiAffx.15534.1 /CNT=2 /FEA=EST /TIER=ConsEnd /STK=1 /NOTE=sequence(s) not in UniGene /REP_ORG=
Ghi.7954.1.S1_s_at	DT468555	Ghi.6088	3.30944	0.0292223	gb:DT468555 /DB_XREF=gi:73865817 /DB_XREF=GH_CHX22A21.r /CLONE=GH_CHX22A21 /TID=Ghi.7954.1 /CNT=26 /FEA=EST /TIER=ConsEnd /STK=2 /UG=Ghi.7954 /UG_TITLE=Transcribed locus, strongly similar to NP_190150.1 ATMPK3 (MITOGEN-ACTIVATED PROTEIN KINASE 3); MAP kinase kinase protein kinase (Arabidopsis thaliana) /REP_ORG=G. hirsutum
Ghi.5073.1.A1_at	DT049188	Ghi.5073	3.30933	0	gb:DT049188 /DB_XREF=gi:72273506 /DB_XREF=COT_DJ_G11 /TID=Ghi.5073.1 /CNT=1 /FEA=EST /TIER=ConsEnd /STK=1 /UG=Ghi.5073 /UG_TITLE=Transcribed locus /REP_ORG=G. hirsutum
GhiAffx.43507.1.S1_s_at	DW513667.1	Ghi.24592	3.3093	0	gb:DW513667.1 dbest_id:35119450 /TID=GhiAffx.43507.1 /CNT=2 /FEA=EST /TIER=ConsEnd /STK=1 /NOTE=sequence(s) not in UniGene /REP_ORG=
GhiAffx.49393.1.S1_at	DW236739.1	Ghi.12706	3.30889	0	gb:DW236739.1 dbest_id:34840905 /TID=GhiAffx.49393.1 /CNT=5 /FEA=EST /TIER=ConsEnd /STK=0 /NOTE=sequence(s) not in UniGene /REP_ORG=
GhiAffx.2173.2.A1_x_at	DT459962	Ghi.19441	3.30865	0	gb:DT459962 /DB_XREF=gi:73850942 /DB_XREF=GH_ON38I20.r /CLONE=GH_ON38I20 /TID=GhiAffx.2173.2 /CNT=3 /FEA=EST /TIER=ConsEnd /STK=1 /NOTE=sequence(s) not in UniGene /REP_ORG=G. hirsutum
Ghi.9182.3.S1_at	DT461494	Ghi.9182	3.30707	0.00854976	gb:DT461494 /DB_XREF=gi:73858755 /DB_XREF=GH_CHX01A12.x /CLONE=GH_CHX01A12 /TID=Ghi.9182.3 /CNT=5 /FEA=EST /TIER=ConsEnd /STK=0 /UG=Ghi.9182 /UG_TITLE=Transcribed locus, weakly similar to NP_567644.1 WRKY31; transcription factor (Arabidopsis thaliana) /REP_ORG=G. hirsutum
GhiAffx.12721.1.A1_at	DT466341	---	3.30679	0	gb:DT466341 /DB_XREF=gi:73863602 /DB_XREF=GH_CHX18L20.r /CLONE=GH_CHX18L20 /TID=GhiAffx.12721.1 /CNT=2 /FEA=EST /TIER=ConsEnd /STK=1 /NOTE=sequence(s) not in UniGene /REP_ORG=G. hirsutum
Ghi.2748.1.A1_at	DT050557	Ghi.17623	3.30482	0	gb:DT050557 /DB_XREF=gi:72276282 /DB_XREF=COT_EB_A07 /TID=Ghi.2748.1 /CNT=5 /FEA=EST /TIER=ConsEnd /STK=4 /UG=Ghi.2748 /UG_TITLE=Transcribed locus, weakly similar to NP_176888.2 unknown protein (Arabidopsis thaliana) /REP_ORG=G. hirsutum
GhiAffx.48558.2.S1_x_at	DW505583.1	---	3.30326	0	gb:DW505583.1 dbest_id:35111366 /TID=GhiAffx.48558.2 /CNT=2 /FEA=EST /TIER=ConsEnd /STK=0 /NOTE=sequence(s) not in UniGene /REP_ORG=
Ghi.8208.2.A1_s_at	DT462524	Ghi.8208	3.30238	0	gb:DT462524 /DB_XREF=gi:73859785 /DB_XREF=GH_CHX12D13.r /CLONE=GH_CHX12D13 /TID=Ghi.8208.2 /CNT=1 /FEA=EST /TIER=ConsEnd /STK=1 /UG=Ghi.8208 /UG_TITLE=Transcribed locus, strongly similar to NP_196361.1 GDH2 (GLUTAMATE DEHYDROGENASE 2); oxidoreductase (Arabidopsis thaliana) /REP_ORG=G. hirsutum
GhiAffx.23477.1.S1_at	DW230903.1	Ghi.16848	3.30055	0	gb:DW230903.1 dbest_id:34835075 /TID=GhiAffx.23477.1 /CNT=3 /FEA=EST /TIER=ConsEnd /STK=1 /NOTE=sequence(s) not in UniGene /REP_ORG=
Ghi.9953.2.S1_at	DT570225	Ghi.9953	3.30038	0.403009	gb:DT570225 /DB_XREF=gi:78349951 /DB_XREF=EST1080865 /TID=Ghi.9953.2 /CNT=9 /FEA=EST /TIER=ConsEnd /STK=0 /UG=Ghi.9953 /UG_TITLE=Transcribed locus, moderately similar to NP_194112.1 WRKY53; transcription factor (Arabidopsis thaliana) /REP_ORG=G. hirsutum
GhiAffx.33148.1.S1_s_at	DW495479.1	Ghi.14073	3.29513	0	gb:DW495479.1 dbest_id:35099907 /TID=GhiAffx.33148.1 /CNT=3 /FEA=EST /TIER=ConsEnd /STK=0 /NOTE=sequence(s) not in UniGene /REP_ORG=
Ghi.5940.1.A1_at	DR459315	Ghi.17404	3.29483	0	gb:DR459315 /DB_XREF=gi:84170667 /DB_XREF=CM075A04 /TID=Ghi.5940.1 /CNT=3 /FEA=EST /TIER=ConsEnd /STK=0 /UG=Ghi.5940 /UG_TITLE=Transcribed locus, moderately similar to NP_187818.1 ACT11 (ACTIN-11); structural constituent of cytoskeleton (Arabidopsis thaliana) /REP_ORG=G. hirsutum
Ghi.8831.1.S1_at	DT456586	Ghi.9943	3.29389	0	gb:DT456586 /DB_XREF=gi:73847566 /DB_XREF=GH_ON33B09.f /CLONE=GH_ON33B09 /TID=Ghi.8831.1 /CNT=5 /FEA=EST /TIER=ConsEnd /STK=1 /UG=Ghi.8831 /UG_TITLE=Transcribed locus /REP_ORG=G. hirsutum
GhiAffx.21968.2.S1_s_at	DW498154.1	Ghi.18006	3.29207	0	gb:DW498154.1 dbest_id:35102582 /TID=GhiAffx.21968.2 /CNT=3 /FEA=EST /TIER=ConsEnd /STK=0 /NOTE=sequence(s) not in UniGene /REP_ORG=
Ghi.5242.1.S1_at	DT048517	Ghi.5242	3.29057	0	gb:DT048517 /DB_XREF=gi:72272168 /DB_XREF=COT_DB_E03 /TID=Ghi.5242.1 /CNT=3 /FEA=EST /TIER=ConsEnd /STK=1 /UG=Ghi.5242 /UG_TITLE=Transcribed locus, weakly similar to NP_174116.1 unknown protein (Arabidopsis thaliana) /REP_ORG=G. hirsutum
GhiAffx.49595.1.S1_at	DW482035.1	---	3.28809	0	gb:DW482035.1 dbest_id:35086463 /TID=GhiAffx.49595.1 /CNT=4 /FEA=EST /TIER=ConsEnd /STK=0 /NOTE=sequence(s) not in UniGene /REP_ORG=
Ghi.147.1.A1_at	DR462334	Ghi.147	3.28772	0	gb:DR462334 /DB_XREF=gi:84173686 /DB_XREF=CM106H02 /TID=Ghi.147.1 /CNT=1 /FEA=EST /TIER=ConsEnd /STK=0 /UG=Ghi.147 /UG_TITLE=Transcribed locus /REP_ORG=G. hirsutum
GhiAffx.8481.1.S1_at	DW241837.1	Ghi.2491	3.28551	0	gb:DW241837.1 dbest_id:34846003 /TID=GhiAffx.8481.1 /CNT=6 /FEA=EST /TIER=ConsEnd /STK=2 /NOTE=sequence(s) not in UniGene /REP_ORG=
GhiAffx.13718.1.S1_s_at	DT049976	---	3.28524	0	gb:DT049976 /DB_XREF=gi:72275092 /DB_XREF=COT_DT_F04 /TID=GhiAffx.13718.1 /CNT=1 /FEA=EST /TIER=ConsEnd /STK=1 /NOTE=sequence(s) not in UniGene /REP_ORG=G. hirsutum
Ghi.4117.1.A1_s_at	DT457769	Ghi.4880	3.28502	0	gb:DT457769 /DB_XREF=gi:73848749 /DB_XREF=GH_ON35A19.r /CLONE=GH_ON35A19 /TID=Ghi.4117.1 /CNT=3 /FEA=EST /TIER=ConsEnd /STK=1 /UG=Ghi.4117 /UG_TITLE=Transcribed locus, weakly similar to NP_172157.1 unknown protein (Arabidopsis thaliana) /REP_ORG=G. hirsutum
GhiAffx.9723.1.S1_s_at	DT049889	Ghi.12192	3.28481	0	gb:DT049889 /DB_XREF=gi:72274919 /DB_XREF=COT_DS_E03 /TID=GhiAffx.9723.1 /CNT=5 /FEA=EST /TIER=ConsEnd /STK=0 /NOTE=sequence(s) not in UniGene /REP_ORG=G. hirsutum
GraAffx.16646.1.S1_s_at	CO121296	---	3.28206	0	gb:CO121296 /DB_XREF=gi:48819983 /DB_XREF=GR__Eb02G18.f /CLONE=GR__Eb02G18 /TID=GraAffx.16646.1 /CNT=1 /FEA=EST /TIER=ConsEnd /STK=0 /NOTE=sequence(s) not in UniGene /REP_ORG=G. raimondii
Gra.2447.1.A1_at	CO079992	Gra.2447	3.28122	0	gb:CO079992 /DB_XREF=gi:48749473 /DB_XREF=GR__Ea43C17.r /CLONE=GR__Ea43C17 /TID=Gra.2447.1 /CNT=3 /FEA=EST /TIER=ConsEnd /STK=1 /UG=Gra.2447 /UG_TITLE=Transcribed locus, weakly similar to XP_466474.1 serinethreonine-protein kinase Nek4-like (Oryza sativa (japonica cultivar-group)) /REP_ORG=G. raimondii
Ghi.5114.1.A1_at	DT049022	Ghi.5114	3.2805	0	gb:DT049022 /DB_XREF=gi:72273175 /DB_XREF=COT_DH_H01 /TID=Ghi.5114.1 /CNT=1 /FEA=EST /TIER=ConsEnd /STK=1 /UG=Ghi.5114 /UG_TITLE=Transcribed locus /REP_ORG=G. hirsutum
Gra.2678.1.A1_at	CO086531	Gra.2678	3.27789	0.00854976	gb:CO086531 /DB_XREF=gi:48777165 /DB_XREF=GR__Ea04I19.r /CLONE=GR__Ea04I19 /TID=Gra.2678.1 /CNT=3 /FEA=EST /TIER=ConsEnd /STK=1 /UG=Gra.2678 /UG_TITLE=Transcribed locus, weakly similar to XP_469450.1 putative PAP_fibrillin (Oryza sativa (japonica cultivar-group)) /REP_ORG=G. raimondii
GraAffx.12664.1.A1_s_at	CO069586	---	3.27757	0	gb:CO069586 /DB_XREF=gi:48739067 /DB_XREF=GR__Ea26D21.r /CLONE=GR__Ea26D21 /TID=GraAffx.12664.1 /CNT=2 /FEA=EST /TIER=ConsEnd /STK=1 /NOTE=sequence(s) not in UniGene /REP_ORG=G. raimondii
GhiAffx.32096.1.S1_at	DT049776	Ghi.19279	3.27724	0	gb:DT049776 /DB_XREF=gi:72274669 /DB_XREF=COT_DR_B07 /TID=GhiAffx.32096.1 /CNT=2 /FEA=EST /TIER=ConsEnd /STK=1 /NOTE=sequence(s) not in UniGene /REP_ORG=G. hirsutum
Gra.1637.1.S1_s_at	CO124114	Gra.1637	3.27721	0	gb:CO124114 /DB_XREF=gi:48822801 /DB_XREF=GR__Eb06M19.f /CLONE=GR__Eb06M19 /TID=Gra.1637.1 /CNT=3 /FEA=EST /TIER=ConsEnd /STK=0 /UG=Gra.1637 /UG_TITLE=Transcribed locus, moderately similar to NP_188630.1 myosin (ATM) (Arabidopsis thaliana) /REP_ORG=G. raimondii
Ghi.9280.3.S1_at	DT463005	Ghi.9280	3.27597	0	gb:DT463005 /DB_XREF=gi:73860266 /DB_XREF=GH_CHX12O18.f /CLONE=GH_CHX12O18 /TID=Ghi.9280.3 /CNT=4 /FEA=EST /TIER=ConsEnd /STK=0 /UG=Ghi.9280 /UG_TITLE=Transcribed locus, moderately similar to XP_473226.1 OSJNBa0019D11.23 (Oryza sativa (japonica cultivar-group)) /REP_ORG=G. hirsutum
GhiAffx.23811.1.S1_at	DW513863.1	Ghi.14682	3.27591	0	gb:DW513863.1 dbest_id:35119646 /TID=GhiAffx.23811.1 /CNT=3 /FEA=EST /TIER=ConsEnd /STK=0 /NOTE=sequence(s) not in UniGene /REP_ORG=
Ghi.9022.1.A1_at	DR461448	Ghi.9022	3.27189	0	gb:DR461448 /DB_XREF=gi:84172800 /DB_XREF=CM097E05 /TID=Ghi.9022.1 /CNT=3 /FEA=EST /TIER=ConsEnd /STK=1 /UG=Ghi.9022 /UG_TITLE=Transcribed locus, moderately similar to NP_199708.1 binding (Arabidopsis thaliana) /REP_ORG=G. hirsutum
GhiAffx.1935.1.S1_at	DW232175.1	Ghi.13571	3.27185	0	gb:DW232175.1 dbest_id:34836341 /TID=GhiAffx.1935.1 /CNT=4 /FEA=EST /TIER=ConsEnd /STK=0 /NOTE=sequence(s) not in UniGene /REP_ORG=
Ghi.4405.1.S1_at	DR455938	Ghi.4405	3.26989	0	gb:DR455938 /DB_XREF=gi:84167290 /DB_XREF=CM039E05 /TID=Ghi.4405.1 /CNT=2 /FEA=EST /TIER=ConsEnd /STK=0 /UG=Ghi.4405 /UG_TITLE=Transcribed locus, moderately similar to NP_566508.1 ATCOX17 (Arabidopsis thaliana) /REP_ORG=G. hirsutum
Ghi.8400.1.S1_s_at	DN827419	Ghi.9142	3.26883	0.0366566	gb:DN827419 /DB_XREF=gi:84158372 /DB_XREF=G.hir-20, 30 hrs post inoculation 729 /TID=Ghi.8400.1 /CNT=3 /FEA=EST /TIER=ConsEnd /STK=0 /UG=Ghi.8400 /UG_TITLE=Transcribed locus, weakly similar to NP_179117.1 unknown protein (Arabidopsis thaliana) /REP_ORG=G. hirsutum
GhiAffx.15731.1.S1_s_at	DW237774.1	Ghi.2150	3.26881	0	gb:DW237774.1 dbest_id:34841940 /TID=GhiAffx.15731.1 /CNT=2 /FEA=EST /TIER=ConsEnd /STK=1 /NOTE=sequence(s) not in UniGene /REP_ORG=
GhiAffx.24035.1.A1_at	DW509174.1	Ghi.21825	3.26654	0	gb:DW509174.1 dbest_id:35114957 /TID=GhiAffx.24035.1 /CNT=2 /FEA=EST /TIER=ConsEnd /STK=1 /NOTE=sequence(s) not in UniGene /REP_ORG=
GhiAffx.47930.1.S1_at	DW502518.1	Ghi.13017	3.26636	0	gb:DW502518.1 dbest_id:35106946 /TID=GhiAffx.47930.1 /CNT=3 /FEA=EST /TIER=ConsEnd /STK=0 /NOTE=sequence(s) not in UniGene /REP_ORG=
Ghi.3228.1.A1_at	DT468194	Ghi.3228	3.2597	0.00854976	gb:DT468194 /DB_XREF=gi:73865456 /DB_XREF=GH_CHX21I11.r /CLONE=GH_CHX21I11 /TID=Ghi.3228.1 /CNT=1 /FEA=EST /TIER=ConsEnd /STK=1 /UG=Ghi.3228 /UG_TITLE=Transcribed locus, moderately similar to XP_463462.1 putative helicase-like transcription factor (Oryza sativa (japonica cultivar-group)) /REP_ORG=G. hirsutum
Ghi.877.1.S1_at	DR453744	Ghi.877	3.25958	0	gb:DR453744 /DB_XREF=gi:84165096 /DB_XREF=CM016E03 /TID=Ghi.877.1 /CNT=1 /FEA=EST /TIER=ConsEnd /STK=0 /UG=Ghi.877 /UG_TITLE=Transcribed locus /REP_ORG=G. hirsutum
Ghi.9059.1.S1_at	DT461078	Ghi.9059	3.25957	0	gb:DT461078 /DB_XREF=gi:73852058 /DB_XREF=GH_ON40F03.r /CLONE=GH_ON40F03 /TID=Ghi.9059.1 /CNT=3 /FEA=EST /TIER=ConsEnd /STK=1 /UG=Ghi.9059 /UG_TITLE=Transcribed locus, weakly similar to NP_191696.1 unknown protein (Arabidopsis thaliana) /REP_ORG=G. hirsutum
Gra.1552.2.A1_x_at	CO085215	Gra.1552	3.25691	0	gb:CO085215 /DB_XREF=gi:48775849 /DB_XREF=GR__Ea02D23.r /CLONE=GR__Ea02D23 /TID=Gra.1552.2 /CNT=3 /FEA=EST /TIER=ConsEnd /STK=0 /UG=Gra.1552 /UG_TITLE=Transcribed locus, moderately similar to XP_465877.1 kelch repeat-containing F-box protein-like (Oryza sativa (japonica cultivar-group)) /REP_ORG=G. raimondii
Ghi.4482.1.A1_at	DT052506	Ghi.4482	3.25515	0	gb:DT052506 /DB_XREF=gi:72280375 /DB_XREF=COT_FD_B12 /TID=Ghi.4482.1 /CNT=6 /FEA=EST /TIER=ConsEnd /STK=3 /UG=Ghi.4482 /UG_TITLE=Transcribed locus, moderately similar to NP_173414.1 MP (MONOPTEROS); transcription factor (Arabidopsis thaliana) /REP_ORG=G. hirsutum
GhiAffx.40738.1.S1_at	DW499244.1	---	3.25193	0	gb:DW499244.1 dbest_id:35103672 /TID=GhiAffx.40738.1 /CNT=2 /FEA=EST /TIER=ConsEnd /STK=1 /NOTE=sequence(s) not in UniGene /REP_ORG=
GhiAffx.8099.1.A1_s_at	DW511277.1	Ghi.2123	3.25092	0	gb:DW511277.1 dbest_id:35117060 /TID=GhiAffx.8099.1 /CNT=4 /FEA=EST /TIER=ConsEnd /STK=1 /NOTE=sequence(s) not in UniGene /REP_ORG=
Ghi.4.1.A1_at	CK987701	Ghi.4	3.25088	0	gb:CK987701 /DB_XREF=gi:45594852 /DB_XREF=SP3-A12(P7-C1) /CLONE=SP3-A12(P7-C1) /TID=Ghi.4.1 /CNT=13 /FEA=EST /TIER=ConsEnd /STK=0 /UG=Ghi.4 /UG_TITLE=Transcribed locus, weakly similar to XP_474657.1 OSJNBa0052P16.8 (Oryza sativa (japonica cultivar-group)) /REP_ORG=G. hirsutum
Ghi.5190.1.A1_s_at	DT457863	Ghi.5190	3.25048	0	gb:DT457863 /DB_XREF=gi:73848843 /DB_XREF=GH_ON35D08.r /CLONE=GH_ON35D08 /TID=Ghi.5190.1 /CNT=5 /FEA=EST /TIER=ConsEnd /STK=0 /UG=Ghi.5190 /UG_TITLE=Transcribed locus, moderately similar to NP_175113.2 protein binding (Arabidopsis thaliana) /REP_ORG=G. hirsutum
GhiAffx.6818.1.A1_s_at	DW505040.1	Ghi.13627	3.25023	0	gb:DW505040.1 dbest_id:35110823 /TID=GhiAffx.6818.1 /CNT=2 /FEA=EST /TIER=ConsEnd /STK=1 /NOTE=sequence(s) not in UniGene /REP_ORG=
Ghi.4391.1.A1_at	DT053510	Ghi.4391	3.24735	0.00854976	gb:DT053510 /DB_XREF=gi:72282501 /DB_XREF=COT_FR_B08 /TID=Ghi.4391.1 /CNT=1 /FEA=EST /TIER=ConsEnd /STK=1 /UG=Ghi.4391 /UG_TITLE=Transcribed locus, moderately similar to NP_192980.1 catalytic trehalose-phosphatase (Arabidopsis thaliana) /REP_ORG=G. hirsutum
Ghi.7912.1.S1_s_at	DT466654	Ghi.7912	3.24552	0	gb:DT466654 /DB_XREF=gi:73863915 /DB_XREF=GH_CHX19D03.r /CLONE=GH_CHX19D03 /TID=Ghi.7912.1 /CNT=5 /FEA=EST /TIER=ConsEnd /STK=1 /UG=Ghi.7912 /UG_TITLE=Transcribed locus, moderately similar to NP_172291.1 calmodulin binding lactoylglutathione lyase (Arabidopsis thaliana) /REP_ORG=G. hirsutum
Ghi.9122.1.A1_at	DT463587	Ghi.9122	3.2446	0.0480414	gb:DT463587 /DB_XREF=gi:73860848 /DB_XREF=GH_CHX13M12.r /CLONE=GH_CHX13M12 /TID=Ghi.9122.1 /CNT=4 /FEA=EST /TIER=ConsEnd /STK=1 /UG=Ghi.9122 /UG_TITLE=Transcribed locus /REP_ORG=G. hirsutum
GhiAffx.64249.7.S1_x_at	DW240084.1	Ghi.1403	3.24418	0	gb:DW240084.1 dbest_id:34844250 /TID=GhiAffx.64249.7 /CNT=3 /FEA=EST /TIER=ConsEnd /STK=0 /NOTE=sequence(s) not in UniGene /REP_ORG=
GhiAffx.14062.1.A1_s_at	CO495806	---	3.24298	0	gb:CO495806 /DB_XREF=gi:54120297 /DB_XREF=G.h.fbr-sw05196 /TID=GhiAffx.14062.1 /CNT=2 /FEA=EST /TIER=ConsEnd /STK=0 /NOTE=sequence(s) not in UniGene /REP_ORG=G. hirsutum
GhiAffx.19354.1.S1_s_at	DW488498.1	Ghi.15226	3.24283	0.0366566	gb:DW488498.1 dbest_id:35092926 /TID=GhiAffx.19354.1 /CNT=5 /FEA=EST /TIER=ConsEnd /STK=0 /NOTE=sequence(s) not in UniGene /REP_ORG=
Ghi.443.2.A1_x_at	DT051897	Ghi.4690	3.24245	0	gb:DT051897 /DB_XREF=gi:72279167 /DB_XREF=COT_ER_F11 /TID=Ghi.443.2 /CNT=2 /FEA=EST /TIER=ConsEnd /STK=0 /UG=Ghi.443 /UG_TITLE=Transcribed locus, strongly similar to NP_196254.1 structural constituent of ribosome (Arabidopsis thaliana) /REP_ORG=G. hirsutum
Ghi.6214.1.A1_x_at	CO494134	Ghi.6214	3.23967	0	gb:CO494134 /DB_XREF=gi:54118625 /DB_XREF=G.h.fbr-sw03524 /TID=Ghi.6214.1 /CNT=2 /FEA=EST /TIER=ConsEnd /STK=0 /UG=Ghi.6214 /UG_TITLE=Transcribed locus, moderately similar to NP_566136.1 unknown protein (Arabidopsis thaliana) /REP_ORG=G. hirsutum
Ghi.6264.1.A1_s_at	CO493264	Ghi.6264	3.23795	0	gb:CO493264 /DB_XREF=gi:54117755 /DB_XREF=G.h.fbr-sw02654 /TID=Ghi.6264.1 /CNT=2 /FEA=EST /TIER=ConsEnd /STK=0 /UG=Ghi.6264 /UG_TITLE=Transcribed locus, weakly similar to NP_566712.1 lipid binding (Arabidopsis thaliana) /REP_ORG=G. hirsutum
GhiAffx.14660.1.A1_at	AJ513856	---	3.23716	0	gb:AJ513856 /DB_XREF=gi:24977339 /DB_XREF=AJ513856 /CLONE=suo49g04r3 /TID=GhiAffx.14660.1 /CNT=2 /FEA=EST /TIER=ConsEnd /STK=0 /NOTE=sequence(s) not in UniGene /REP_ORG=G. hirsutum
Ghi.6537.1.S1_at	CD485959	Ghi.6537	3.23569	0	gb:CD485959 /DB_XREF=gi:31406924 /DB_XREF=CFUS5.1C03 /CLONE=CFUS5.1C03 /TID=Ghi.6537.1 /CNT=4 /FEA=EST /TIER=ConsEnd /STK=0 /UG=Ghi.6537 /UG_TITLE=Transcribed locus, moderately similar to NP_564732.1 ZW18 (Arabidopsis thaliana) /REP_ORG=G. hirsutum
GhiAffx.47261.1.S1_s_at	DW517401.1	Ghi.11207	3.23391	0.00854976	gb:DW517401.1 dbest_id:35123184 /TID=GhiAffx.47261.1 /CNT=4 /FEA=EST /TIER=ConsEnd /STK=1 /NOTE=sequence(s) not in UniGene /REP_ORG=
Ghi.3722.1.S1_at	DT462292	Ghi.3722	3.23372	0	gb:DT462292 /DB_XREF=gi:73859553 /DB_XREF=GH_CHX11A06.x /CLONE=GH_CHX11A06 /TID=Ghi.3722.1 /CNT=1 /FEA=EST /TIER=ConsEnd /STK=0 /UG=Ghi.3722 /UG_TITLE=Transcribed locus, weakly similar to NP_189238.2 RGS1 (REGULATOR OF G-PROTEIN SIGNALING 1); signal transducer (Arabidopsis thaliana) /REP_ORG=G. hirsutum
Ghi.9136.4.A1_s_at	DT462579	Ghi.9136	3.23278	0	gb:DT462579 /DB_XREF=gi:73859840 /DB_XREF=GH_CHX12E21.r /CLONE=GH_CHX12E21 /TID=Ghi.9136.4 /CNT=1 /FEA=EST /TIER=ConsEnd /STK=1 /UG=Ghi.9136 /UG_TITLE=Transcribed locus /REP_ORG=G. hirsutum
GhiAffx.8275.1.S1_at	DW512338.1	Ghi.9451	3.22886	0	gb:DW512338.1 dbest_id:35118121 /TID=GhiAffx.8275.1 /CNT=3 /FEA=EST /TIER=ConsEnd /STK=0 /NOTE=sequence(s) not in UniGene /REP_ORG=
GhiAffx.49994.1.A1_s_at	DT463463	---	3.22878	0	gb:DT463463 /DB_XREF=gi:73860724 /DB_XREF=GH_CHX13J12.r /CLONE=GH_CHX13J12 /TID=GhiAffx.49994.1 /CNT=1 /FEA=EST /TIER=ConsEnd /STK=1 /NOTE=sequence(s) not in UniGene /REP_ORG=G. hirsutum
GhiAffx.16131.1.A1_s_at	DW223828.1	Ghi.11740	3.22836	0	gb:DW223828.1 dbest_id:34828000 /TID=GhiAffx.16131.1 /CNT=2 /FEA=EST /TIER=ConsEnd /STK=2 /NOTE=sequence(s) not in UniGene /REP_ORG=
Ghi.3319.1.A1_at	DT559091	Ghi.3997	3.22658	0	gb:DT559091 /DB_XREF=gi:78338817 /DB_XREF=EST1069731 /TID=Ghi.3319.1 /CNT=3 /FEA=EST /TIER=ConsEnd /STK=0 /UG=Ghi.3319 /UG_TITLE=Transcribed locus /REP_ORG=G. hirsutum
GhiAffx.47990.1.A1_at	DN762303	Ghi.13040	3.22615	0.0238141	gb:DN762303 /DB_XREF=gi:84148061 /DB_XREF=G.hir-stem 4810 /TID=GhiAffx.47990.1 /CNT=3 /FEA=EST /TIER=ConsEnd /STK=0 /NOTE=sequence(s) not in UniGene /REP_ORG=G. hirsutum
GhiAffx.42419.1.S1_at	DW519289.1	Ghi.13141	3.22381	0	gb:DW519289.1 dbest_id:35125072 /TID=GhiAffx.42419.1 /CNT=4 /FEA=EST /TIER=ConsEnd /STK=0 /NOTE=sequence(s) not in UniGene /REP_ORG=
Ghi.29.1.A1_at	DR463516	Ghi.29	3.22198	0	gb:DR463516 /DB_XREF=gi:84174868 /DB_XREF=CM119C07 /TID=Ghi.29.1 /CNT=1 /FEA=EST /TIER=ConsEnd /STK=0 /UG=Ghi.29 /UG_TITLE=Transcribed locus, weakly similar to NP_974373.1 unknown protein (Arabidopsis thaliana) /REP_ORG=G. hirsutum
GhiAffx.41414.1.A1_at	DW502819.1	Ghi.13250	3.2208	0	gb:DW502819.1 dbest_id:35107247 /TID=GhiAffx.41414.1 /CNT=2 /FEA=EST /TIER=ConsEnd /STK=1 /NOTE=sequence(s) not in UniGene /REP_ORG=
GhiAffx.9612.1.S1_at	DW512271.1	Ghi.14012	3.21897	0	gb:DW512271.1 dbest_id:35118054 /TID=GhiAffx.9612.1 /CNT=4 /FEA=EST /TIER=ConsEnd /STK=1 /NOTE=sequence(s) not in UniGene /REP_ORG=
Ghi.3615.1.A1_s_at	DT463750	Ghi.3615	3.21863	0	gb:DT463750 /DB_XREF=gi:73861011 /DB_XREF=GH_CHX14A16.r /CLONE=GH_CHX14A16 /TID=Ghi.3615.1 /CNT=2 /FEA=EST /TIER=ConsEnd /STK=0 /UG=Ghi.3615 /UG_TITLE=Transcribed locus, weakly similar to NP_180484.2 unknown protein (Arabidopsis thaliana) /REP_ORG=G. hirsutum
Ghi.3185.2.S1_at	DT461062	Ghi.3185	3.21838	0	gb:DT461062 /DB_XREF=gi:73852042 /DB_XREF=GH_ON40E19.f /CLONE=GH_ON40E19 /TID=Ghi.3185.2 /CNT=2 /FEA=EST /TIER=ConsEnd /STK=0 /UG=Ghi.3185 /UG_TITLE=Transcribed locus /REP_ORG=G. hirsutum
Ghi.10388.2.S1_at	DT469076	Ghi.10388	3.2175	0	gb:DT469076 /DB_XREF=gi:73866338 /DB_XREF=GH_CHX22O19.r /CLONE=GH_CHX22O19 /TID=Ghi.10388.2 /CNT=1 /FEA=EST /TIER=ConsEnd /STK=1 /UG=Ghi.10388 /UG_TITLE=Transcribed locus, moderately similar to NP_194825.1 CIPK6 (CBL-INTERACTING PROTEIN KINASE 6); ATP binding kinase protein kinase protein serinethreonine kinase protein-tyrosine kinase (Arabidopsis thaliana) /REP_ORG=G. hirsutum
Ghi.8293.1.S1_s_at	AI728446	Ghi.8293	3.21657	0	gb:AI728446 /DB_XREF=gi:5047298 /DB_XREF=BNLGHi10785 /TID=Ghi.8293.1 /CNT=4 /FEA=EST /TIER=ConsEnd /STK=0 /UG=Ghi.8293 /UG_TITLE=Transcribed locus, moderately similar to NP_001031485.1 GRLNAP1NAPP (Arabidopsis thaliana) /REP_ORG=G. hirsutum
GraAffx.34081.1.S1_at	CO070024	---	3.21616	0	gb:CO070024 /DB_XREF=gi:48739505 /DB_XREF=GR__Ea26N22.r /CLONE=GR__Ea26N22 /TID=GraAffx.34081.1 /CNT=3 /FEA=EST /TIER=ConsEnd /STK=1 /NOTE=sequence(s) not in UniGene /REP_ORG=G. raimondii
GhiAffx.61757.1.S1_s_at	DW511140.1	---	3.21614	0	gb:DW511140.1 dbest_id:35116923 /TID=GhiAffx.61757.1 /CNT=1 /FEA=EST /TIER=ConsEnd /STK=0 /NOTE=sequence(s) not in UniGene /REP_ORG=
Ghi.5083.1.A1_s_at	DT047943	Ghi.9331	3.21446	0	gb:DT047943 /DB_XREF=gi:72271014 /DB_XREF=COT_CU_C10 /TID=Ghi.5083.1 /CNT=3 /FEA=EST /TIER=ConsEnd /STK=0 /UG=Ghi.5083 /UG_TITLE=Transcribed locus, moderately similar to NP_568534.1 translation initiation factor (Arabidopsis thaliana) /REP_ORG=G. hirsutum
GhiAffx.5152.1.S1_at	AI729603	Ghi.12670	3.21404	0	gb:AI729603 /DB_XREF=gi:5048455 /DB_XREF=BNLGHi13760 /TID=GhiAffx.5152.1 /CNT=3 /FEA=EST /TIER=ConsEnd /STK=0 /NOTE=sequence(s) not in UniGene /REP_ORG=G. hirsutum
GraAffx.33589.1.A1_x_at	CO071453	---	3.21199	0	gb:CO071453 /DB_XREF=gi:48740934 /DB_XREF=GR__Ea29J17.r /CLONE=GR__Ea29J17 /TID=GraAffx.33589.1 /CNT=7 /FEA=EST /TIER=ConsEnd /STK=5 /NOTE=sequence(s) not in UniGene /REP_ORG=G. raimondii
GhiAffx.23161.1.S1_at	DW504389.1	Ghi.12242	3.2117	0	gb:DW504389.1 dbest_id:35108817 /TID=GhiAffx.23161.1 /CNT=4 /FEA=EST /TIER=ConsEnd /STK=0 /NOTE=sequence(s) not in UniGene /REP_ORG=
Ghi.7.1.S1_x_at	DR463892	Ghi.7	3.21086	0	gb:DR463892 /DB_XREF=gi:84175244 /DB_XREF=CM123C03 /TID=Ghi.7.1 /CNT=1 /FEA=EST /TIER=ConsEnd /STK=0 /UG=Ghi.7 /UG_TITLE=Transcribed locus /REP_ORG=G. hirsutum
Gra.1750.1.A1_at	CO121340	Gra.1750	3.2095	0	gb:CO121340 /DB_XREF=gi:48820027 /DB_XREF=GR__Eb02H18.r /CLONE=GR__Eb02H18 /TID=Gra.1750.1 /CNT=1 /FEA=EST /TIER=ConsEnd /STK=1 /UG=Gra.1750 /UG_TITLE=Transcribed locus /REP_ORG=G. raimondii
Ghi.4108.3.A1_x_at	DT046825	Ghi.4108	3.20883	0	gb:DT046825 /DB_XREF=gi:72268632 /DB_XREF=COT_CD_B10 /TID=Ghi.4108.3 /CNT=1 /FEA=EST /TIER=ConsEnd /STK=1 /UG=Ghi.4108 /UG_TITLE=Transcribed locus, weakly similar to NP_192835.1 unknown protein (Arabidopsis thaliana) /REP_ORG=G. hirsutum
Ghi.520.1.S1_at	DR458532	Ghi.520	3.20839	0	gb:DR458532 /DB_XREF=gi:84169884 /DB_XREF=CM066G04 /TID=Ghi.520.1 /CNT=1 /FEA=EST /TIER=ConsEnd /STK=0 /UG=Ghi.520 /UG_TITLE=Transcribed locus, strongly similar to NP_176255.2 catalytic naphthoate synthase (Arabidopsis thaliana) /REP_ORG=G. hirsutum
Gra.2763.1.S1_s_at	CO089733	Gra.2763	3.20666	0	gb:CO089733 /DB_XREF=gi:48780374 /DB_XREF=GR__Ea09F17.r /CLONE=GR__Ea09F17 /TID=Gra.2763.1 /CNT=4 /FEA=EST /TIER=ConsEnd /STK=2 /UG=Gra.2763 /UG_TITLE=Transcribed locus, weakly similar to NP_197519.1 expressed protein (Arabidopsis thaliana) /REP_ORG=G. raimondii
Ghi.4219.1.S1_s_at	DT456151	Ghi.4219	3.20594	0	gb:DT456151 /DB_XREF=gi:73847131 /DB_XREF=GH_ON12C08.f /CLONE=GH_ON12C08 /TID=Ghi.4219.1 /CNT=3 /FEA=EST /TIER=ConsEnd /STK=0 /UG=Ghi.4219 /UG_TITLE=Transcribed locus, moderately similar to NP_922334.1 putative electron transfer oxidoreductase (Oryza sativa (japonica cultivar-group)) /REP_ORG=G. hirsutum
GhiAffx.5305.1.S1_at	DT460024	---	3.20573	0	gb:DT460024 /DB_XREF=gi:73851004 /DB_XREF=GH_ON38K08.r /CLONE=GH_ON38K08 /TID=GhiAffx.5305.1 /CNT=2 /FEA=EST /TIER=ConsEnd /STK=1 /NOTE=sequence(s) not in UniGene /REP_ORG=G. hirsutum
Ghi.3328.1.A1_at	DT463239	Ghi.18615	3.20454	0.0627412	gb:DT463239 /DB_XREF=gi:73860500 /DB_XREF=GH_CHX13E10.r /CLONE=GH_CHX13E10 /TID=Ghi.3328.1 /CNT=6 /FEA=EST /TIER=ConsEnd /STK=1 /UG=Ghi.3328 /UG_TITLE=Transcribed locus, weakly similar to NP_195453.1 CYP81D8; heme binding iron ion binding monooxygenase oxygen binding (Arabidopsis thaliana) /REP_ORG=G. hirsutum
Ghi.2358.1.A1_at	DT459746	---	3.20244	0	gb:DT459746 /DB_XREF=gi:73850726 /DB_XREF=GH_ON38C24.r /CLONE=GH_ON38C24 /TID=Ghi.2358.1 /CNT=1 /FEA=EST /TIER=ConsEnd /STK=1 /UG=Ghi.2358 /UG_TITLE=Transcribed locus, weakly similar to NP_194147.2 catalytic hydrolase (Arabidopsis thaliana) /REP_ORG=G. hirsutum
GraAffx.31485.1.S1_at	CO077629	---	3.20187	0.0480414	gb:CO077629 /DB_XREF=gi:48747110 /DB_XREF=GR__Ea39I01.r /CLONE=GR__Ea39I01 /TID=GraAffx.31485.1 /CNT=4 /FEA=EST /TIER=ConsEnd /STK=2 /NOTE=sequence(s) not in UniGene /REP_ORG=G. raimondii
GraAffx.22751.1.A1_s_at	CO117994	---	3.20145	0.00854976	gb:CO117994 /DB_XREF=gi:48816681 /DB_XREF=GR__Eb020B24.r /CLONE=GR__Eb020B24 /TID=GraAffx.22751.1 /CNT=3 /FEA=EST /TIER=ConsEnd /STK=1 /NOTE=sequence(s) not in UniGene /REP_ORG=G. raimondii
Ghi.3971.1.S1_at	DT456516	Ghi.3971	3.20064	0.00854976	gb:DT456516 /DB_XREF=gi:73847496 /DB_XREF=GH_ON16G08.f /CLONE=GH_ON16G08 /TID=Ghi.3971.1 /CNT=5 /FEA=EST /TIER=ConsEnd /STK=0 /UG=Ghi.3971 /UG_TITLE=Transcribed locus /REP_ORG=G. hirsutum
GhiAffx.43841.1.S1_s_at	DW515615.1	---	3.20057	0	gb:DW515615.1 dbest_id:35121398 /TID=GhiAffx.43841.1 /CNT=2 /FEA=EST /TIER=ConsEnd /STK=1 /NOTE=sequence(s) not in UniGene /REP_ORG=
Ghi.2072.2.S1_x_at	DT468416	Ghi.2072	3.20055	0.0292223	gb:DT468416 /DB_XREF=gi:73865678 /DB_XREF=GH_CHX21N12.r /CLONE=GH_CHX21N12 /TID=Ghi.2072.2 /CNT=1 /FEA=EST /TIER=ConsEnd /STK=1 /UG=Ghi.2072 /UG_TITLE=Transcribed locus, moderately similar to NP_568600.1 unknown protein (Arabidopsis thaliana) /REP_ORG=G. hirsutum
Ghi.7325.3.S1_s_at	DT455748	Ghi.7325	3.20046	0	gb:DT455748 /DB_XREF=gi:73846728 /DB_XREF=GH_ON03A06.f /CLONE=GH_ON03A06 /TID=Ghi.7325.3 /CNT=5 /FEA=EST /TIER=ConsEnd /STK=0 /UG=Ghi.7325 /UG_TITLE=Transcribed locus, moderately similar to NP_193448.2 catalytic (Arabidopsis thaliana) /REP_ORG=G. hirsutum
GhiAffx.5728.1.A1_at	DW511502.1	Ghi.11432	3.20042	0	gb:DW511502.1 dbest_id:35117285 /TID=GhiAffx.5728.1 /CNT=4 /FEA=EST /TIER=ConsEnd /STK=1 /NOTE=sequence(s) not in UniGene /REP_ORG=
GhiAffx.25920.1.A1_at	DW519074.1	---	3.19913	0	gb:DW519074.1 dbest_id:35124857 /TID=GhiAffx.25920.1 /CNT=2 /FEA=EST /TIER=ConsEnd /STK=1 /NOTE=sequence(s) not in UniGene /REP_ORG=
Ghi.10296.3.S1_x_at	DT468127	Ghi.10296	3.19706	0.0333442	gb:DT468127 /DB_XREF=gi:73865389 /DB_XREF=GH_CHX21G21.f /CLONE=GH_CHX21G21 /TID=Ghi.10296.3 /CNT=6 /FEA=EST /TIER=ConsEnd /STK=0 /UG=Ghi.10296 /UG_TITLE=Transcribed locus, weakly similar to NP_200888.2 metal ion binding (Arabidopsis thaliana) /REP_ORG=G. hirsutum
Gra.97.1.S1_s_at	CO096853	Gra.97	3.19616	0.0333442	gb:CO096853 /DB_XREF=gi:48795539 /DB_XREF=GR__Ea20F24.f /CLONE=GR__Ea20F24 /TID=Gra.97.1 /CNT=2 /FEA=EST /TIER=ConsEnd /STK=0 /UG=Gra.97 /UG_TITLE=Transcribed locus, weakly similar to XP_470614.1 Putative Squalene monooxygenase (Oryza sativa (japonica cultivar-group)) /REP_ORG=G. raimondii
Ghi.5768.1.S1_s_at	DN779344	Ghi.5768	3.19545	0	gb:DN779344 /DB_XREF=gi:62295958 /DB_XREF=CFUS6.4B06 /CLONE=CFUS6.4B06 /TID=Ghi.5768.1 /CNT=2 /FEA=EST /TIER=ConsEnd /STK=0 /UG=Ghi.5768 /UG_TITLE=Transcribed locus /REP_ORG=G. hirsutum
Ghi.3910.1.A1_at	DT460440	Ghi.3910	3.19512	0	gb:DT460440 /DB_XREF=gi:73851420 /DB_XREF=GH_ON39E24.r /CLONE=GH_ON39E24 /TID=Ghi.3910.1 /CNT=2 /FEA=EST /TIER=ConsEnd /STK=2 /UG=Ghi.3910 /UG_TITLE=Transcribed locus, weakly similar to XP_858458.1 PREDICTED: hypothetical protein XP_853365 (Canis familiaris) /REP_ORG=G. hirsutum
GraAffx.1926.1.S1_at	CO123317	---	3.19408	0	gb:CO123317 /DB_XREF=gi:48822004 /DB_XREF=GR__Eb05G11.r /CLONE=GR__Eb05G11 /TID=GraAffx.1926.1 /CNT=2 /FEA=EST /TIER=ConsEnd /STK=1 /NOTE=sequence(s) not in UniGene /REP_ORG=G. raimondii
GhiAffx.7371.1.S1_at	DW511135.1	Ghi.14316	3.19375	0	gb:DW511135.1 dbest_id:35116918 /TID=GhiAffx.7371.1 /CNT=4 /FEA=EST /TIER=ConsEnd /STK=1 /NOTE=sequence(s) not in UniGene /REP_ORG=
GhiAffx.62607.1.S1_at	DW504137.1	Ghi.15935	3.19371	0	gb:DW504137.1 dbest_id:35108565 /TID=GhiAffx.62607.1 /CNT=7 /FEA=EST /TIER=ConsEnd /STK=1 /NOTE=sequence(s) not in UniGene /REP_ORG=
GhiAffx.10556.1.S1_s_at	DW239825.1	Ghi.14599	3.19329	0	gb:DW239825.1 dbest_id:34843991 /TID=GhiAffx.10556.1 /CNT=3 /FEA=EST /TIER=ConsEnd /STK=0 /NOTE=sequence(s) not in UniGene /REP_ORG=
GhiAffx.448.1.S1_at	DW502657.1	Ghi.20409	3.19239	0	gb:DW502657.1 dbest_id:35107085 /TID=GhiAffx.448.1 /CNT=4 /FEA=EST /TIER=ConsEnd /STK=1 /NOTE=sequence(s) not in UniGene /REP_ORG=
GhiAffx.7281.1.S1_at	DW510184.1	Ghi.12858	3.19182	0.0292223	gb:DW510184.1 dbest_id:35115967 /TID=GhiAffx.7281.1 /CNT=3 /FEA=EST /TIER=ConsEnd /STK=1 /NOTE=sequence(s) not in UniGene /REP_ORG=
Gra.1814.2.A1_a_at	CO113719	Gra.1814	3.19125	0	gb:CO113719 /DB_XREF=gi:48812406 /DB_XREF=GR__Eb014D05.r /CLONE=GR__Eb014D05 /TID=Gra.1814.2 /CNT=1 /FEA=EST /TIER=ConsEnd /STK=1 /UG=Gra.1814 /UG_TITLE=Transcribed locus, strongly similar to XP_470803.1 abscisic acid-inducible protein kinase (Oryza sativa (japonica cultivar-group)) /REP_ORG=G. raimondii
GraAffx.21977.1.A1_at	CO117760	---	3.18907	0	gb:CO117760 /DB_XREF=gi:48816447 /DB_XREF=GR__Eb01L24.r /CLONE=GR__Eb01L24 /TID=GraAffx.21977.1 /CNT=3 /FEA=EST /TIER=ConsEnd /STK=2 /NOTE=sequence(s) not in UniGene /REP_ORG=G. raimondii
Ghi.1757.1.S1_s_at	DN758685	Ghi.1757	3.18733	0	gb:DN758685 /DB_XREF=gi:84144443 /DB_XREF=G.hir-stem 1189 /TID=Ghi.1757.1 /CNT=1 /FEA=EST /TIER=ConsEnd /STK=0 /UG=Ghi.1757 /UG_TITLE=Transcribed locus /REP_ORG=G. hirsutum
GhiAffx.32354.1.S1_at	DW505142.1	---	3.18673	0	gb:DW505142.1 dbest_id:35110925 /TID=GhiAffx.32354.1 /CNT=2 /FEA=EST /TIER=ConsEnd /STK=0 /NOTE=sequence(s) not in UniGene /REP_ORG=
GhiAffx.46536.1.A1_at	DW500027.1	Ghi.20767	3.18635	0	gb:DW500027.1 dbest_id:35104455 /TID=GhiAffx.46536.1 /CNT=2 /FEA=EST /TIER=ConsEnd /STK=0 /NOTE=sequence(s) not in UniGene /REP_ORG=
Ghi.3340.1.S1_s_at	AY283056.1	Ghi.16356	3.18424	0	gb:AY283056.1 /DB_XREF=gi:33439495 /GEN=CMK1 /TID=Ghi.3340.1 /CNT=11 /FEA=FLmRNA /TIER=FL /STK=1 /UG=Ghi.3340 /DEF=Gossypium hirsutum central motor kinesin 1 (CMK1) mRNA, complete cds. /PROD=central motor kinesin 1 /FL=gb:AY283056.1 /REP_ORG=G. hirsutum
Ghi.3651.2.A1_at	DT463189	Ghi.3651	3.18364	0	gb:DT463189 /DB_XREF=gi:73860450 /DB_XREF=GH_CHX13D05.r /CLONE=GH_CHX13D05 /TID=Ghi.3651.2 /CNT=3 /FEA=EST /TIER=ConsEnd /STK=0 /UG=Ghi.3651 /UG_TITLE=Transcribed locus, weakly similar to NP_566998.1 EMB1967 (Arabidopsis thaliana) /REP_ORG=G. hirsutum
Ghi.978.1.S1_at	DR452546	Ghi.978	3.18314	0	gb:DR452546 /DB_XREF=gi:84163898 /DB_XREF=CM003G07 /TID=Ghi.978.1 /CNT=1 /FEA=EST /TIER=ConsEnd /STK=0 /UG=Ghi.978 /UG_TITLE=Transcribed locus, moderately similar to XP_464282.1 unknown protein (Oryza sativa (japonica cultivar-group)) /REP_ORG=G. hirsutum
GhiAffx.44044.1.S1_at	DW516634.1	---	3.18229	0	gb:DW516634.1 dbest_id:35122417 /TID=GhiAffx.44044.1 /CNT=2 /FEA=EST /TIER=ConsEnd /STK=0 /NOTE=sequence(s) not in UniGene /REP_ORG=
Ghi.4231.1.S1_at	DT456109	Ghi.4231	3.17894	0	gb:DT456109 /DB_XREF=gi:73847089 /DB_XREF=GH_ON11G11.f /CLONE=GH_ON11G11 /TID=Ghi.4231.1 /CNT=3 /FEA=EST /TIER=ConsEnd /STK=0 /UG=Ghi.4231 /UG_TITLE=Transcribed locus, moderately similar to NP_190962.2 binding transporter (Arabidopsis thaliana) /REP_ORG=G. hirsutum
Ghi.4181.1.S1_at	DT456327	Ghi.4181	3.17854	0	gb:DT456327 /DB_XREF=gi:73847307 /DB_XREF=GH_ON14E01.f /CLONE=GH_ON14E01 /TID=Ghi.4181.1 /CNT=2 /FEA=EST /TIER=ConsEnd /STK=0 /UG=Ghi.4181 /UG_TITLE=Transcribed locus /REP_ORG=G. hirsutum
Ghi.3292.2.S1_at	DN760569	Ghi.3292	3.17818	0	gb:DN760569 /DB_XREF=gi:84146327 /DB_XREF=G.hir-stem 3076 /TID=Ghi.3292.2 /CNT=4 /FEA=EST /TIER=ConsEnd /STK=0 /UG=Ghi.3292 /UG_TITLE=Transcribed locus, moderately similar to NP_565685.1 unknown protein (Arabidopsis thaliana) /REP_ORG=G. hirsutum
Ghi.7643.1.A1_s_at	AI728633	Ghi.7643	3.17773	0.0366566	gb:AI728633 /DB_XREF=gi:5047485 /DB_XREF=BNLGHi11274 /TID=Ghi.7643.1 /CNT=3 /FEA=EST /TIER=ConsEnd /STK=0 /UG=Ghi.7643 /UG_TITLE=Transcribed locus, moderately similar to NP_200588.2 WAX2; catalytic (Arabidopsis thaliana) /REP_ORG=G. hirsutum
GhiAffx.6731.1.S1_s_at	DW503835.1	Ghi.5558	3.17529	0	gb:DW503835.1 dbest_id:35108263 /TID=GhiAffx.6731.1 /CNT=2 /FEA=EST /TIER=ConsEnd /STK=0 /NOTE=sequence(s) not in UniGene /REP_ORG=
GhiAffx.2749.2.S1_at	DW504859.1	---	3.17496	0	gb:DW504859.1 dbest_id:35110642 /TID=GhiAffx.2749.2 /CNT=2 /FEA=EST /TIER=ConsEnd /STK=1 /NOTE=sequence(s) not in UniGene /REP_ORG=
GhiAffx.23700.1.S1_s_at	DW507395.1	Ghi.5217	3.17201	0.00854976	gb:DW507395.1 dbest_id:35113178 /TID=GhiAffx.23700.1 /CNT=2 /FEA=EST /TIER=ConsEnd /STK=0 /NOTE=sequence(s) not in UniGene /REP_ORG=
Ghi.5007.1.A1_at	DT049479	Ghi.5007	3.17197	0	gb:DT049479 /DB_XREF=gi:72274084 /DB_XREF=COT_DN_C12 /TID=Ghi.5007.1 /CNT=1 /FEA=EST /TIER=ConsEnd /STK=1 /UG=Ghi.5007 /UG_TITLE=Transcribed locus /REP_ORG=G. hirsutum
Ghi.3250.3.S1_at	DT465548	Ghi.17853	3.16878	0.0366566	gb:DT465548 /DB_XREF=gi:73862809 /DB_XREF=GH_CHX17I18.f /CLONE=GH_CHX17I18 /TID=Ghi.3250.3 /CNT=4 /FEA=EST /TIER=ConsEnd /STK=0 /UG=Ghi.3250 /UG_TITLE=Transcribed locus, moderately similar to NP_189492.1 ATP binding ATPase nucleoside-triphosphatase nucleotide binding (Arabidopsis thaliana) /REP_ORG=G. hirsutum
Ghi.3255.2.A1_at	DR458844	Ghi.3255	3.16864	0	gb:DR458844 /DB_XREF=gi:84170196 /DB_XREF=CM070A09 /TID=Ghi.3255.2 /CNT=2 /FEA=EST /TIER=ConsEnd /STK=0 /UG=Ghi.3255 /UG_TITLE=Transcribed locus, moderately similar to NP_179466.1 ATP binding ATP-dependent helicase DNA binding helicase nucleic acid binding (Arabidopsis thaliana) /REP_ORG=G. hirsutum
Ghi.7890.1.S1_at	DT466478	Ghi.7890	3.16712	0	gb:DT466478 /DB_XREF=gi:73863739 /DB_XREF=GH_CHX18O23.r /CLONE=GH_CHX18O23 /TID=Ghi.7890.1 /CNT=8 /FEA=EST /TIER=ConsEnd /STK=1 /UG=Ghi.7890 /UG_TITLE=Transcribed locus, weakly similar to NP_198005.1 copper ion binding electron transporter (Arabidopsis thaliana) /REP_ORG=G. hirsutum
GhiAffx.22009.1.S1_at	DW498371.1	Ghi.16633	3.16617	0	gb:DW498371.1 dbest_id:35102799 /TID=GhiAffx.22009.1 /CNT=2 /FEA=EST /TIER=ConsEnd /STK=1 /NOTE=sequence(s) not in UniGene /REP_ORG=
Ghi.6327.2.A1_at	DT463316	Ghi.6327	3.16481	0	gb:DT463316 /DB_XREF=gi:73860577 /DB_XREF=GH_CHX13G03.r /CLONE=GH_CHX13G03 /TID=Ghi.6327.2 /CNT=2 /FEA=EST /TIER=ConsEnd /STK=1 /UG=Ghi.6327 /UG_TITLE=Transcribed locus, weakly similar to NP_178407.2 unknown protein (Arabidopsis thaliana) /REP_ORG=G. hirsutum
GhiAffx.59389.1.S1_at	DW499158.1	---	3.1629	0	gb:DW499158.1 dbest_id:35103586 /TID=GhiAffx.59389.1 /CNT=2 /FEA=EST /TIER=ConsEnd /STK=0 /NOTE=sequence(s) not in UniGene /REP_ORG=
GhiAffx.15865.1.S1_a_at	DW238663.1	Ghi.16100	3.16176	0.00854976	gb:DW238663.1 dbest_id:34842829 /TID=GhiAffx.15865.1 /CNT=4 /FEA=EST /TIER=ConsEnd /STK=0 /NOTE=sequence(s) not in UniGene /REP_ORG=
Ghi.3560.1.S1_s_at	DT464300	Ghi.3560	3.15931	0	gb:DT464300 /DB_XREF=gi:73861561 /DB_XREF=GH_CHX15G11.r /CLONE=GH_CHX15G11 /TID=Ghi.3560.1 /CNT=2 /FEA=EST /TIER=ConsEnd /STK=0 /UG=Ghi.3560 /UG_TITLE=Transcribed locus, weakly similar to NP_175713.1 ATP binding kinase protein kinase protein serinethreonine kinase protein-tyrosine kinase (Arabidopsis thaliana) /REP_ORG=G. hirsutum
Ghi.3346.1.A1_s_at	DT467074	Ghi.17933	3.15681	0	gb:DT467074 /DB_XREF=gi:73864335 /DB_XREF=GH_CHX19N11.r /CLONE=GH_CHX19N11 /TID=Ghi.3346.1 /CNT=4 /FEA=EST /TIER=ConsEnd /STK=1 /UG=Ghi.3346 /UG_TITLE=Transcribed locus, moderately similar to XP_475813.1 unknown protein (Oryza sativa (japonica cultivar-group)) /REP_ORG=G. hirsutum
Ghi.8431.1.S1_at	CO492510	Ghi.8431	3.15651	0	gb:CO492510 /DB_XREF=gi:54117001 /DB_XREF=G.h.fbr-sw01900 /TID=Ghi.8431.1 /CNT=2 /FEA=EST /TIER=ConsEnd /STK=0 /UG=Ghi.8431 /UG_TITLE=Transcribed locus /REP_ORG=G. hirsutum
GhiAffx.21686.1.S1_at	DW497578.1	Ghi.11859	3.15561	0	gb:DW497578.1 dbest_id:35102006 /TID=GhiAffx.21686.1 /CNT=3 /FEA=EST /TIER=ConsEnd /STK=1 /NOTE=sequence(s) not in UniGene /REP_ORG=
Ghi.5214.1.S1_at	CA993969	Ghi.5214	3.15282	0	gb:CA993969 /DB_XREF=gi:31073690 /DB_XREF=pGH783 /TID=Ghi.5214.1 /CNT=2 /FEA=EST /TIER=ConsEnd /STK=0 /UG=Ghi.5214 /UG_TITLE=Transcribed locus, moderately similar to NP_181259.1 RNA binding nucleic acid binding (Arabidopsis thaliana) /REP_ORG=G. hirsutum
Ghi.9152.2.A1_at	DT463871	Ghi.17824	3.15267	2.51608	gb:DT463871 /DB_XREF=gi:73861132 /DB_XREF=GH_CHX14G05.r /CLONE=GH_CHX14G05 /TID=Ghi.9152.2 /CNT=3 /FEA=EST /TIER=ConsEnd /STK=2 /UG=Ghi.9152 /UG_TITLE=Transcribed locus, moderately similar to NP_195164.1 nucleotide binding (Arabidopsis thaliana) /REP_ORG=G. hirsutum
GhiAffx.41278.1.S1_at	DW502126.1	Ghi.21622	3.15178	0.0292223	gb:DW502126.1 dbest_id:35106554 /TID=GhiAffx.41278.1 /CNT=2 /FEA=EST /TIER=ConsEnd /STK=0 /NOTE=sequence(s) not in UniGene /REP_ORG=
Ghi.5099.1.A1_at	DT049104	Ghi.5099	3.15177	0	gb:DT049104 /DB_XREF=gi:72273338 /DB_XREF=COT_DI_H02 /TID=Ghi.5099.1 /CNT=1 /FEA=EST /TIER=ConsEnd /STK=1 /UG=Ghi.5099 /UG_TITLE=Transcribed locus /REP_ORG=G. hirsutum
GhiAffx.2408.1.S1_at	DT048479	Ghi.19250	3.15059	0	gb:DT048479 /DB_XREF=gi:72272075 /DB_XREF=COT_DB_A08 /TID=GhiAffx.2408.1 /CNT=2 /FEA=EST /TIER=ConsEnd /STK=1 /NOTE=sequence(s) not in UniGene /REP_ORG=G. hirsutum
GraAffx.17247.2.S1_s_at	CO090575	---	3.14983	0	gb:CO090575 /DB_XREF=gi:48789261 /DB_XREF=GR__Ea10K04.r /CLONE=GR__Ea10K04 /TID=GraAffx.17247.2 /CNT=7 /FEA=EST /TIER=ConsEnd /STK=1 /NOTE=sequence(s) not in UniGene /REP_ORG=G. raimondii
GhiAffx.25398.1.S1_at	DW516152.1	Ghi.12466	3.14887	0	gb:DW516152.1 dbest_id:35121935 /TID=GhiAffx.25398.1 /CNT=3 /FEA=EST /TIER=ConsEnd /STK=1 /NOTE=sequence(s) not in UniGene /REP_ORG=
GhiAffx.23129.1.A1_at	DW504236.1	Ghi.16647	3.14807	0	gb:DW504236.1 dbest_id:35108664 /TID=GhiAffx.23129.1 /CNT=3 /FEA=EST /TIER=ConsEnd /STK=1 /NOTE=sequence(s) not in UniGene /REP_ORG=
Ghi.3809.1.S1_at	DT461559	Ghi.3809	3.14616	0	gb:DT461559 /DB_XREF=gi:73858820 /DB_XREF=GH_CHX01G10.x /CLONE=GH_CHX01G10 /TID=Ghi.3809.1 /CNT=1 /FEA=EST /TIER=ConsEnd /STK=0 /UG=Ghi.3809 /UG_TITLE=Transcribed locus /REP_ORG=G. hirsutum
Ghi.3444.2.S1_at	DT465789	Ghi.3444	3.14572	0	gb:DT465789 /DB_XREF=gi:73863050 /DB_XREF=GH_CHX17O24.r /CLONE=GH_CHX17O24 /TID=Ghi.3444.2 /CNT=4 /FEA=EST /TIER=ConsEnd /STK=0 /UG=Ghi.3444 /UG_TITLE=Transcribed locus, moderately similar to NP_916147.1 P0435B05.20 (Oryza sativa (japonica cultivar-group)) /REP_ORG=G. hirsutum
Gra.1705.1.A1_s_at	CO125110	Gra.1705	3.14516	0	gb:CO125110 /DB_XREF=gi:48826720 /DB_XREF=GR__Eb08G17.r /CLONE=GR__Eb08G17 /TID=Gra.1705.1 /CNT=1 /FEA=EST /TIER=ConsEnd /STK=1 /UG=Gra.1705 /UG_TITLE=Transcribed locus, weakly similar to NP_563831.1 amidase family protein (Arabidopsis thaliana) /REP_ORG=G. raimondii
Ghi.4960.1.A1_s_at	DT051751	Ghi.4960	3.14367	0.0480414	gb:DT051751 /DB_XREF=gi:72278874 /DB_XREF=COT_EP_G05 /TID=Ghi.4960.1 /CNT=5 /FEA=EST /TIER=ConsEnd /STK=1 /UG=Ghi.4960 /UG_TITLE=Transcribed locus, moderately similar to NP_194504.2 unknown protein (Arabidopsis thaliana) /REP_ORG=G. hirsutum
Ghi.10750.1.S1_at	DT462864	Ghi.10750	3.14346	0	gb:DT462864 /DB_XREF=gi:73860125 /DB_XREF=GH_CHX12L11.r /CLONE=GH_CHX12L11 /TID=Ghi.10750.1 /CNT=29 /FEA=EST /TIER=ConsEnd /STK=1 /UG=Ghi.10750 /UG_TITLE=Transcribed locus, weakly similar to NP_195958.1 metal ion binding (Arabidopsis thaliana) /REP_ORG=G. hirsutum
Ghi.1904.1.S1_at	DV849345	Ghi.1904	3.1426	0	gb:DV849345 /DB_XREF=gi:82755783 /DB_XREF=GH_LSL10A06.f /CLONE=GH_LSL10A06 /TID=Ghi.1904.1 /CNT=1 /FEA=EST /TIER=ConsEnd /STK=0 /UG=Ghi.1904 /UG_TITLE=Transcribed locus /REP_ORG=G. hirsutum
GhiAffx.24031.1.S1_at	DW509164.1	---	3.14201	0	gb:DW509164.1 dbest_id:35114947 /TID=GhiAffx.24031.1 /CNT=2 /FEA=EST /TIER=ConsEnd /STK=1 /NOTE=sequence(s) not in UniGene /REP_ORG=
Ghi.306.4.S1_s_at	AI730268	Ghi.10369	3.14141	0	gb:AI730268 /DB_XREF=gi:5049120 /DB_XREF=BNLGHi6534 /TID=Ghi.306.4 /CNT=1 /FEA=EST /TIER=ConsEnd /STK=1 /UG=Ghi.306 /UG_TITLE=Transcribed locus, moderately similar to NP_177775.2 HMG1 (3-HYDROXY-3-METHYLGLUTARYL COA REDUCTASE) (Arabidopsis thaliana) /REP_ORG=G. hirsutum
GarAffx.21008.1.S1_s_at	BM359580	---	3.141	0	gb:BM359580 /DB_XREF=gi:18100326 /DB_XREF=GA__Ea0021H20r /CLONE=GA__Ea0021H20r /TID=GarAffx.21008.1 /CNT=3 /FEA=EST /TIER=ConsEnd /STK=2 /NOTE=sequence(s) not in UniGene /REP_ORG=G. arboreum
GhiAffx.24932.1.A1_at	DW513658.1	Ghi.19269	3.14047	0	gb:DW513658.1 dbest_id:35119441 /TID=GhiAffx.24932.1 /CNT=3 /FEA=EST /TIER=ConsEnd /STK=2 /NOTE=sequence(s) not in UniGene /REP_ORG=
GhiAffx.31302.1.A1_s_at	DR460125	Ghi.13623	3.1398	0	gb:DR460125 /DB_XREF=gi:84171477 /DB_XREF=CM083E09 /TID=GhiAffx.31302.1 /CNT=3 /FEA=EST /TIER=ConsEnd /STK=0 /NOTE=sequence(s) not in UniGene /REP_ORG=G. hirsutum
GhiAffx.21710.1.S1_at	DW496724.1	Ghi.21459	3.13975	0.0333442	gb:DW496724.1 dbest_id:35101152 /TID=GhiAffx.21710.1 /CNT=1 /FEA=EST /TIER=ConsEnd /STK=0 /NOTE=sequence(s) not in UniGene /REP_ORG=
Ghi.8878.1.A1_x_at	DT461119	Ghi.1173	3.13865	0	gb:DT461119 /DB_XREF=gi:73852099 /DB_XREF=GH_ON40G04.r /CLONE=GH_ON40G04 /TID=Ghi.8878.1 /CNT=6 /FEA=EST /TIER=ConsEnd /STK=1 /UG=Ghi.8878 /UG_TITLE=Transcribed locus, weakly similar to XP_518349.1 PREDICTED: similar to HLA-B associated transcript 1; HLA-B associated transcript-1; DEAD-box protein; nuclear RNA helicase (DEAD family) (Pan troglodytes) /REP_ORG=G. hirsutum
Ghi.4266.1.S1_at	DT455996	Ghi.4266	3.13865	0	gb:DT455996 /DB_XREF=gi:73846976 /DB_XREF=GH_ON06D02.f /CLONE=GH_ON06D02 /TID=Ghi.4266.1 /CNT=1 /FEA=EST /TIER=ConsEnd /STK=0 /UG=Ghi.4266 /UG_TITLE=Transcribed locus, weakly similar to NP_173072.1 catalytic protein phosphatase type 2C (Arabidopsis thaliana) /REP_ORG=G. hirsutum
Ghi.5617.1.A1_at	DT047146	Ghi.5617	3.13777	0	gb:DT047146 /DB_XREF=gi:72269419 /DB_XREF=COT_CK_F06 /TID=Ghi.5617.1 /CNT=1 /FEA=EST /TIER=ConsEnd /STK=1 /UG=Ghi.5617 /UG_TITLE=Transcribed locus /REP_ORG=G. hirsutum
Ghi.8129.1.S1_at	AY695833.1	Ghi.8129	3.13612	0	gb:AY695833.1 /DB_XREF=gi:56609043 /GEN=KCH1 /TID=Ghi.8129.1 /CNT=1 /FEA=FLmRNA /TIER=FL /STK=1 /UG=Ghi.8129 /DEF=Gossypium hirsutum kinesin (KCH1) mRNA, complete cds. /PROD=kinesin /FL=gb:AY695833.1 /REP_ORG=G. hirsutum
Ghi.4589.1.A1_s_at	DR453865	Ghi.4589	3.13439	0	gb:DR453865 /DB_XREF=gi:84165217 /DB_XREF=CM017G05 /TID=Ghi.4589.1 /CNT=4 /FEA=EST /TIER=ConsEnd /STK=0 /UG=Ghi.4589 /UG_TITLE=Transcribed locus, weakly similar to NP_187252.1 ATP binding ATP-dependent helicase DNA binding helicase nucleic acid binding (Arabidopsis thaliana) /REP_ORG=G. hirsutum
GhiAffx.15396.2.S1_at	DT456389	---	3.1341	0	gb:DT456389 /DB_XREF=gi:73847369 /DB_XREF=GH_ON15C03.f /CLONE=GH_ON15C03 /TID=GhiAffx.15396.2 /CNT=2 /FEA=EST /TIER=ConsEnd /STK=0 /NOTE=sequence(s) not in UniGene /REP_ORG=G. hirsutum
GhiAffx.60409.1.S1_at	DW520391.1	Ghi.11060	3.13287	0	gb:DW520391.1 dbest_id:35126174 /TID=GhiAffx.60409.1 /CNT=3 /FEA=EST /TIER=ConsEnd /STK=0 /NOTE=sequence(s) not in UniGene /REP_ORG=
Ghi.7159.1.A1_at	AJ513949	Ghi.8489	3.13138	0	gb:AJ513949 /DB_XREF=gi:24977432 /DB_XREF=AJ513949 /CLONE=suo56g04r3 /TID=Ghi.7159.1 /CNT=4 /FEA=EST /TIER=ConsEnd /STK=0 /UG=Ghi.7159 /UG_TITLE=Transcribed locus /REP_ORG=G. hirsutum
GhiAffx.25235.1.A1_at	DW515288.1	---	3.13071	0.0238141	gb:DW515288.1 dbest_id:35121071 /TID=GhiAffx.25235.1 /CNT=2 /FEA=EST /TIER=ConsEnd /STK=1 /NOTE=sequence(s) not in UniGene /REP_ORG=
Gra.1806.1.S1_at	CO093634	Gra.1806	3.12912	0	gb:CO093634 /DB_XREF=gi:48792320 /DB_XREF=GR__Ea15F07.f /CLONE=GR__Ea15F07 /TID=Gra.1806.1 /CNT=3 /FEA=EST /TIER=ConsEnd /STK=0 /UG=Gra.1806 /UG_TITLE=Transcribed locus, strongly similar to NP_051055.1 photosystem II 44 kDa protein (Arabidopsis thaliana) /REP_ORG=G. raimondii
Ghi.1793.1.S1_at	DN758206	Ghi.1793	3.12866	0	gb:DN758206 /DB_XREF=gi:84143964 /DB_XREF=G.hir-stem 710 /TID=Ghi.1793.1 /CNT=1 /FEA=EST /TIER=ConsEnd /STK=0 /UG=Ghi.1793 /UG_TITLE=Transcribed locus, moderately similar to NP_191027.3 TTN8 (TITAN8); ATP binding (Arabidopsis thaliana) /REP_ORG=G. hirsutum
Ghi.8337.1.A1_s_at	AJ513185	Ghi.8337	3.12841	0	gb:AJ513185 /DB_XREF=gi:24976667 /DB_XREF=AJ513185 /CLONE=su187c11r3 /TID=Ghi.8337.1 /CNT=2 /FEA=EST /TIER=ConsEnd /STK=0 /UG=Ghi.8337 /UG_TITLE=Transcribed locus, weakly similar to NP_201223.1 unknown protein (Arabidopsis thaliana) /REP_ORG=G. hirsutum
Ghi.1440.3.S1_at	DT466051	Ghi.1440	3.12815	0	gb:DT466051 /DB_XREF=gi:73863312 /DB_XREF=GH_CHX18F07.f /CLONE=GH_CHX18F07 /TID=Ghi.1440.3 /CNT=3 /FEA=EST /TIER=ConsEnd /STK=0 /UG=Ghi.1440 /UG_TITLE=Transcribed locus, moderately similar to NP_176009.1 ATP binding protein kinase protein serinethreonine kinase protein-tyrosine kinase (Arabidopsis thaliana) /REP_ORG=G. hirsutum
Ghi.1642.1.S1_at	DN760196	Ghi.1642	3.12717	0.0238141	gb:DN760196 /DB_XREF=gi:84145954 /DB_XREF=G.hir-stem 2703 /TID=Ghi.1642.1 /CNT=1 /FEA=EST /TIER=ConsEnd /STK=0 /UG=Ghi.1642 /UG_TITLE=Transcribed locus, weakly similar to NP_181459.4 RNA binding (Arabidopsis thaliana) /REP_ORG=G. hirsutum
Ghi.6704.1.S1_at	CA993574	Ghi.6704	3.12707	0.403009	gb:CA993574 /DB_XREF=gi:31073295 /DB_XREF=pAR08H03 /TID=Ghi.6704.1 /CNT=2 /FEA=EST /TIER=ConsEnd /STK=0 /UG=Ghi.6704 /UG_TITLE=Transcribed locus /REP_ORG=G. hirsutum
GraAffx.31296.1.S1_at	CO123228	---	3.12542	0.0333442	gb:CO123228 /DB_XREF=gi:48821915 /DB_XREF=GR__Eb05E06.f /CLONE=GR__Eb05E06 /TID=GraAffx.31296.1 /CNT=6 /FEA=EST /TIER=ConsEnd /STK=0 /NOTE=sequence(s) not in UniGene /REP_ORG=G. raimondii
GhiAffx.64116.1.S1_at	DW234100.1	Ghi.16237	3.12522	1.32424	gb:DW234100.1 dbest_id:34838266 /TID=GhiAffx.64116.1 /CNT=5 /FEA=EST /TIER=ConsEnd /STK=0 /NOTE=sequence(s) not in UniGene /REP_ORG=
GhiAffx.25303.1.S1_at	DW515630.1	---	3.12499	0	gb:DW515630.1 dbest_id:35121413 /TID=GhiAffx.25303.1 /CNT=2 /FEA=EST /TIER=ConsEnd /STK=1 /NOTE=sequence(s) not in UniGene /REP_ORG=
GraAffx.12661.1.S1_at	CO070157	---	3.12498	0	gb:CO070157 /DB_XREF=gi:48739638 /DB_XREF=GR__Ea27A23.r /CLONE=GR__Ea27A23 /TID=GraAffx.12661.1 /CNT=3 /FEA=EST /TIER=ConsEnd /STK=1 /NOTE=sequence(s) not in UniGene /REP_ORG=G. raimondii
GraAffx.1885.1.S1_x_at	CO123549	Gra.3350	3.12417	0	gb:CO123549 /DB_XREF=gi:48822236 /DB_XREF=GR__Eb05M03.r /CLONE=GR__Eb05M03 /TID=GraAffx.1885.1 /CNT=5 /FEA=EST /TIER=ConsEnd /STK=2 /NOTE=sequence(s) not in UniGene /REP_ORG=G. raimondii
Ghi.5298.1.S1_at	DT048269	Ghi.5298	3.12302	0	gb:DT048269 /DB_XREF=gi:72271659 /DB_XREF=COT_CY_E11 /TID=Ghi.5298.1 /CNT=3 /FEA=EST /TIER=ConsEnd /STK=1 /UG=Ghi.5298 /UG_TITLE=Transcribed locus /REP_ORG=G. hirsutum
Ghi.9060.1.S1_at	DT461092	Ghi.9060	3.12099	0	gb:DT461092 /DB_XREF=gi:73852072 /DB_XREF=GH_ON40F11.r /CLONE=GH_ON40F11 /TID=Ghi.9060.1 /CNT=4 /FEA=EST /TIER=ConsEnd /STK=2 /UG=Ghi.9060 /UG_TITLE=Transcribed locus /REP_ORG=G. hirsutum
Ghi.6031.1.S1_at	DR459476	Ghi.6031	3.12096	0	gb:DR459476 /DB_XREF=gi:84170828 /DB_XREF=CM076F11 /TID=Ghi.6031.1 /CNT=2 /FEA=EST /TIER=ConsEnd /STK=0 /UG=Ghi.6031 /UG_TITLE=Transcribed locus, moderately similar to NP_199194.1 ZLL (ZWILLE) (Arabidopsis thaliana) /REP_ORG=G. hirsutum
GraAffx.18277.1.S1_at	CO078320	---	3.1203	0	gb:CO078320 /DB_XREF=gi:48747801 /DB_XREF=GR__Ea40I15.f /CLONE=GR__Ea40I15 /TID=GraAffx.18277.1 /CNT=2 /FEA=EST /TIER=ConsEnd /STK=0 /NOTE=sequence(s) not in UniGene /REP_ORG=G. raimondii
Ghi.3758.1.S1_at	DT461980	Ghi.3758	3.11977	0	gb:DT461980 /DB_XREF=gi:73859241 /DB_XREF=GH_CHX07B07.x /CLONE=GH_CHX07B07 /TID=Ghi.3758.1 /CNT=1 /FEA=EST /TIER=ConsEnd /STK=0 /UG=Ghi.3758 /UG_TITLE=Transcribed locus /REP_ORG=G. hirsutum
Gra.1783.1.A1_s_at	CO117812	Gra.1783	3.11926	0	gb:CO117812 /DB_XREF=gi:48816499 /DB_XREF=GR__Eb01N11.r /CLONE=GR__Eb01N11 /TID=Gra.1783.1 /CNT=1 /FEA=EST /TIER=ConsEnd /STK=1 /UG=Gra.1783 /UG_TITLE=Transcribed locus /REP_ORG=G. raimondii
GraAffx.2757.1.S1_s_at	CO086569	---	3.1186	0	gb:CO086569 /DB_XREF=gi:48777203 /DB_XREF=GR__Ea04J19.f /CLONE=GR__Ea04J19 /TID=GraAffx.2757.1 /CNT=3 /FEA=EST /TIER=ConsEnd /STK=0 /NOTE=sequence(s) not in UniGene /REP_ORG=G. raimondii
Ghi.9144.2.A1_s_at	DT468570	Ghi.9144	3.11814	0	gb:DT468570 /DB_XREF=gi:73865832 /DB_XREF=GH_CHX22B07.r /CLONE=GH_CHX22B07 /TID=Ghi.9144.2 /CNT=5 /FEA=EST /TIER=ConsEnd /STK=2 /UG=Ghi.9144 /UG_TITLE=Transcribed locus, strongly similar to NP_565416.1 MLO8; calmodulin binding (Arabidopsis thaliana) /REP_ORG=G. hirsutum
GraAffx.23486.1.S1_at	CO100920	---	3.11803	0	gb:CO100920 /DB_XREF=gi:48799606 /DB_XREF=GR__Eb0026N17.f /CLONE=GR__Eb0026N17 /TID=GraAffx.23486.1 /CNT=3 /FEA=EST /TIER=ConsEnd /STK=1 /NOTE=sequence(s) not in UniGene /REP_ORG=G. raimondii
Gra.1208.1.A1_s_at	CO130566	Gra.1208	3.11745	0	gb:CO130566 /DB_XREF=gi:48879544 /DB_XREF=GR__Eb33G06.r /CLONE=GR__Eb33G06 /TID=Gra.1208.1 /CNT=2 /FEA=EST /TIER=ConsEnd /STK=1 /UG=Gra.1208 /UG_TITLE=Transcribed locus /REP_ORG=G. raimondii
Ghi.10398.1.S1_x_at	DT053881	Ghi.10398	3.11668	0	gb:DT053881 /DB_XREF=gi:72283230 /DB_XREF=COT_FW_A07 /TID=Ghi.10398.1 /CNT=6 /FEA=EST /TIER=ConsEnd /STK=1 /UG=Ghi.10398 /UG_TITLE=Transcribed locus, moderately similar to NP_200925.1 structural constituent of ribosome (Arabidopsis thaliana) /REP_ORG=G. hirsutum
Ghi.5780.1.S1_s_at	DN779262	Ghi.17495	3.11564	0	gb:DN779262 /DB_XREF=gi:62295612 /DB_XREF=CFUS1.2E02 /CLONE=CFUS1.2E02 /TID=Ghi.5780.1 /CNT=2 /FEA=EST /TIER=ConsEnd /STK=0 /UG=Ghi.5780 /UG_TITLE=Transcribed locus, weakly similar to NP_193070.1 unknown protein (Arabidopsis thaliana) /REP_ORG=G. hirsutum
Ghi.175.1.S1_at	DR462047	Ghi.175	3.11427	0	gb:DR462047 /DB_XREF=gi:84173399 /DB_XREF=CM103H03 /TID=Ghi.175.1 /CNT=1 /FEA=EST /TIER=ConsEnd /STK=0 /UG=Ghi.175 /UG_TITLE=Transcribed locus, weakly similar to NP_193045.1 hydrolase, acting on glycosyl bonds hydrolase, hydrolyzing O-glycosyl compounds (Arabidopsis thaliana) /REP_ORG=G. hirsutum
Ghi.6722.1.S1_s_at	M88322.1	Ghi.16396	3.1117	0.257021	gb:M88322.1 /DB_XREF=gi:167327 /GEN=Lea14-A /TID=Ghi.6722.1 /CNT=5 /FEA=FLmRNA /TIER=FL /STK=1 /UG=Ghi.6722 /DEF=Gossypium hirsutum group 4 late embryogenesis-abundant protein (Lea14-A) mRNA, complete cds. /PROD=Group 4 late embryogenesis-abundant protein /FL=gb:M88322.1 /REP_ORG=G. hirsutum
Gra.2514.1.A1_at	CO071705	Gra.2514	3.11133	0.00854976	gb:CO071705 /DB_XREF=gi:48741186 /DB_XREF=GR__Ea30D19.r /CLONE=GR__Ea30D19 /TID=Gra.2514.1 /CNT=2 /FEA=EST /TIER=ConsEnd /STK=1 /UG=Gra.2514 /UG_TITLE=Transcribed locus, moderately similar to NP_200614.1 SNARE protein-related (Arabidopsis thaliana) /REP_ORG=G. raimondii
Ghi.9080.1.S1_at	DT575138	Ghi.9080	3.11111	0	gb:DT575138 /DB_XREF=gi:78354864 /DB_XREF=EST1085778 /TID=Ghi.9080.1 /CNT=9 /FEA=EST /TIER=ConsEnd /STK=0 /UG=Ghi.9080 /UG_TITLE=Transcribed locus, moderately similar to NP_190834.1 RNA binding nucleic acid binding (Arabidopsis thaliana) /REP_ORG=G. hirsutum
GhiAffx.53494.1.S1_s_at	DW231595.1	Ghi.9562	3.11087	0	gb:DW231595.1 dbest_id:34835761 /TID=GhiAffx.53494.1 /CNT=2 /FEA=EST /TIER=ConsEnd /STK=0 /NOTE=sequence(s) not in UniGene /REP_ORG=
GhiAffx.33623.1.S1_at	AI055726	Ghi.21278	3.10981	0	gb:AI055726 /DB_XREF=gi:3326840 /DB_XREF=coau0004O21 /CLONE=coau0004O21 /TID=GhiAffx.33623.1 /CNT=3 /FEA=EST /TIER=ConsEnd /STK=0 /NOTE=sequence(s) not in UniGene /REP_ORG=G. hirsutum
GraAffx.30819.1.A1_s_at	CO079573	---	3.10735	0	gb:CO079573 /DB_XREF=gi:48749054 /DB_XREF=GR__Ea42H10.r /CLONE=GR__Ea42H10 /TID=GraAffx.30819.1 /CNT=2 /FEA=EST /TIER=ConsEnd /STK=1 /NOTE=sequence(s) not in UniGene /REP_ORG=G. raimondii
Ghi.750.1.A1_s_at	DR455227	Ghi.16741	3.10453	0	gb:DR455227 /DB_XREF=gi:84166579 /DB_XREF=CM032A09 /TID=Ghi.750.1 /CNT=1 /FEA=EST /TIER=ConsEnd /STK=0 /UG=Ghi.750 /UG_TITLE=Transcribed locus, weakly similar to NP_564517.1 unknown protein (Arabidopsis thaliana) /REP_ORG=G. hirsutum
GhiAffx.42788.1.S1_at	DW509803.1	Ghi.19206	3.10393	0	gb:DW509803.1 dbest_id:35115586 /TID=GhiAffx.42788.1 /CNT=2 /FEA=EST /TIER=ConsEnd /STK=0 /NOTE=sequence(s) not in UniGene /REP_ORG=
Ghi.7940.2.A1_s_at	DT466330	Ghi.7940	3.10284	0.217711	gb:DT466330 /DB_XREF=gi:73863591 /DB_XREF=GH_CHX18L15.f /CLONE=GH_CHX18L15 /TID=Ghi.7940.2 /CNT=5 /FEA=EST /TIER=ConsEnd /STK=0 /UG=Ghi.7940 /UG_TITLE=Transcribed locus, moderately similar to NP_177743.1 SKS5; copper ion binding (Arabidopsis thaliana) /REP_ORG=G. hirsutum
Ghi.6362.1.S1_at	CO491551	Ghi.6362	3.10227	0	gb:CO491551 /DB_XREF=gi:54116042 /DB_XREF=G.h.fbr-sw00941 /TID=Ghi.6362.1 /CNT=2 /FEA=EST /TIER=ConsEnd /STK=0 /UG=Ghi.6362 /UG_TITLE=Transcribed locus, weakly similar to NP_564227.1 unknown protein (Arabidopsis thaliana) /REP_ORG=G. hirsutum
Ghi.8863.1.A1_at	DT457044	Ghi.8863	3.10202	0	gb:DT457044 /DB_XREF=gi:73848024 /DB_XREF=GH_ON33P01.r /CLONE=GH_ON33P01 /TID=Ghi.8863.1 /CNT=3 /FEA=EST /TIER=ConsEnd /STK=1 /UG=Ghi.8863 /UG_TITLE=Transcribed locus /REP_ORG=G. hirsutum
GraAffx.10907.1.S1_s_at	CO122863	---	3.10193	0	gb:CO122863 /DB_XREF=gi:48821550 /DB_XREF=GR__Eb04L06.r /CLONE=GR__Eb04L06 /TID=GraAffx.10907.1 /CNT=2 /FEA=EST /TIER=ConsEnd /STK=1 /NOTE=sequence(s) not in UniGene /REP_ORG=G. raimondii
GhiAffx.40508.1.A1_s_at	DW498079.1	Ghi.2670	3.10096	0	gb:DW498079.1 dbest_id:35102507 /TID=GhiAffx.40508.1 /CNT=3 /FEA=EST /TIER=ConsEnd /STK=2 /NOTE=sequence(s) not in UniGene /REP_ORG=
GhiAffx.2173.1.A1_a_at	DT459188	Ghi.19441	3.1004	0	gb:DT459188 /DB_XREF=gi:73850168 /DB_XREF=GH_ON37E15.r /CLONE=GH_ON37E15 /TID=GhiAffx.2173.1 /CNT=2 /FEA=EST /TIER=ConsEnd /STK=1 /NOTE=sequence(s) not in UniGene /REP_ORG=G. hirsutum
Ghi.8335.1.S1_at	AW587511	Ghi.8335	3.09856	0.00854976	gb:AW587511 /DB_XREF=gi:7958794 /DB_XREF=IPPGHZ0099 /TID=Ghi.8335.1 /CNT=3 /FEA=EST /TIER=ConsEnd /STK=0 /UG=Ghi.8335 /UG_TITLE=Transcribed locus /REP_ORG=G. hirsutum
GhiAffx.15076.1.S1_at	AI729186	---	3.09836	0	gb:AI729186 /DB_XREF=gi:5048038 /DB_XREF=BNLGHi12864 /TID=GhiAffx.15076.1 /CNT=1 /FEA=EST /TIER=ConsEnd /STK=0 /NOTE=sequence(s) not in UniGene /REP_ORG=G. hirsutum
GhiAffx.43893.1.A1_s_at	DW515895.1	Ghi.21978	3.09717	0	gb:DW515895.1 dbest_id:35121678 /TID=GhiAffx.43893.1 /CNT=2 /FEA=EST /TIER=ConsEnd /STK=1 /NOTE=sequence(s) not in UniGene /REP_ORG=
GraAffx.27696.1.S1_s_at	CO088663	---	3.0969	0	gb:CO088663 /DB_XREF=gi:48779297 /DB_XREF=GR__Ea07M02.f /CLONE=GR__Ea07M02 /TID=GraAffx.27696.1 /CNT=2 /FEA=EST /TIER=ConsEnd /STK=0 /NOTE=sequence(s) not in UniGene /REP_ORG=G. raimondii
GhiAffx.41045.1.S1_at	DW501013.1	Ghi.11633	3.09529	0	gb:DW501013.1 dbest_id:35105441 /TID=GhiAffx.41045.1 /CNT=3 /FEA=EST /TIER=ConsEnd /STK=1 /NOTE=sequence(s) not in UniGene /REP_ORG=
Ghi.5306.2.A1_at	DT048238	Ghi.5306	3.09278	0	gb:DT048238 /DB_XREF=gi:72271597 /DB_XREF=COT_CY_B03 /TID=Ghi.5306.2 /CNT=1 /FEA=EST /TIER=ConsEnd /STK=1 /UG=Ghi.5306 /UG_TITLE=Transcribed locus, moderately similar to NP_683440.1 RXW8 (Arabidopsis thaliana) /REP_ORG=G. hirsutum
GhiAffx.53548.1.A1_at	DW231933.1	Ghi.13513	3.09246	0	gb:DW231933.1 dbest_id:34836099 /TID=GhiAffx.53548.1 /CNT=3 /FEA=EST /TIER=ConsEnd /STK=1 /NOTE=sequence(s) not in UniGene /REP_ORG=
Ghi.10508.1.S1_a_at	DN758345	Ghi.10577	3.09197	0.00854976	gb:DN758345 /DB_XREF=gi:84144103 /DB_XREF=G.hir-stem 849 /TID=Ghi.10508.1 /CNT=8 /FEA=EST /TIER=ConsEnd /STK=0 /UG=Ghi.10508 /UG_TITLE=Transcribed locus /REP_ORG=G. hirsutum
Ghi.3776.1.A1_at	DR463043	Ghi.3776	3.08899	0.00854976	gb:DR463043 /DB_XREF=gi:84174395 /DB_XREF=CM114C05 /TID=Ghi.3776.1 /CNT=2 /FEA=EST /TIER=ConsEnd /STK=0 /UG=Ghi.3776 /UG_TITLE=Transcribed locus /REP_ORG=G. hirsutum
Gra.1227.1.S1_s_at	CO103304	Gra.1227	3.08898	0	gb:CO103304 /DB_XREF=gi:48801990 /DB_XREF=GR__Eb0031J03.f /CLONE=GR__Eb0031J03 /TID=Gra.1227.1 /CNT=4 /FEA=EST /TIER=ConsEnd /STK=0 /UG=Gra.1227 /UG_TITLE=Transcribed locus, weakly similar to NP_188077.2 C2 domain-containing protein (Arabidopsis thaliana) /REP_ORG=G. raimondii
Ghi.4037.3.S1_s_at	DT567171	Ghi.4037	3.08853	0.00854976	gb:DT567171 /DB_XREF=gi:78346897 /DB_XREF=EST1077811 /TID=Ghi.4037.3 /CNT=2 /FEA=EST /TIER=ConsEnd /STK=0 /UG=Ghi.4037 /UG_TITLE=Transcribed locus, moderately similar to NP_565711.1 unknown protein (Arabidopsis thaliana) /REP_ORG=G. hirsutum
Ghi.838.1.S1_s_at	DR454132	Ghi.838	3.08588	0	gb:DR454132 /DB_XREF=gi:84165484 /DB_XREF=CM020E11 /TID=Ghi.838.1 /CNT=1 /FEA=EST /TIER=ConsEnd /STK=0 /UG=Ghi.838 /UG_TITLE=Transcribed locus, moderately similar to NP_201168.1 ATP binding ATP-dependent helicase helicase nucleic acid binding (Arabidopsis thaliana) /REP_ORG=G. hirsutum
GhiAffx.52955.1.A1_at	DW225297.1	Ghi.6561	3.08498	0	gb:DW225297.1 dbest_id:34829469 /TID=GhiAffx.52955.1 /CNT=3 /FEA=EST /TIER=ConsEnd /STK=1 /NOTE=sequence(s) not in UniGene /REP_ORG=
Ghi.5307.1.A1_at	DT048232	Ghi.5307	3.08297	0	gb:DT048232 /DB_XREF=gi:72271585 /DB_XREF=COT_CY_A09 /TID=Ghi.5307.1 /CNT=2 /FEA=EST /TIER=ConsEnd /STK=0 /UG=Ghi.5307 /UG_TITLE=Transcribed locus, moderately similar to NP_190397.1 unknown protein (Arabidopsis thaliana) /REP_ORG=G. hirsutum
Ghi.10750.2.S1_s_at	DT553332	Ghi.10750	3.08184	0	gb:DT553332 /DB_XREF=gi:78333058 /DB_XREF=EST1063972 /TID=Ghi.10750.2 /CNT=14 /FEA=EST /TIER=ConsEnd /STK=0 /UG=Ghi.10750 /UG_TITLE=Transcribed locus, weakly similar to NP_195958.1 metal ion binding (Arabidopsis thaliana) /REP_ORG=G. hirsutum
Gra.935.2.S1_s_at	CO126734	Gra.935	3.08048	0	gb:CO126734 /DB_XREF=gi:48828344 /DB_XREF=GR__Eb10O22.r /CLONE=GR__Eb10O22 /TID=Gra.935.2 /CNT=2 /FEA=EST /TIER=ConsEnd /STK=1 /UG=Gra.935 /UG_TITLE=Transcribed locus, moderately similar to NP_199332.2 cyclin family protein (Arabidopsis thaliana) /REP_ORG=G. raimondii
Ghi.1407.1.A1_s_at	DT051753	Ghi.1407	3.08034	0	gb:DT051753 /DB_XREF=gi:72278878 /DB_XREF=COT_EP_G07 /TID=Ghi.1407.1 /CNT=4 /FEA=EST /TIER=ConsEnd /STK=2 /UG=Ghi.1407 /UG_TITLE=Transcribed locus /REP_ORG=G. hirsutum
Ghi.5045.1.A1_at	DT049307	Ghi.14338	3.07857	0	gb:DT049307 /DB_XREF=gi:72273741 /DB_XREF=COT_DL_C02 /TID=Ghi.5045.1 /CNT=1 /FEA=EST /TIER=ConsEnd /STK=1 /UG=Ghi.5045 /UG_TITLE=Transcribed locus, moderately similar to NP_569014.1 DNA binding transcription factor (Arabidopsis thaliana) /REP_ORG=G. hirsutum
GhiAffx.63449.1.A1_s_at	DW520166.1	---	3.07856	0	gb:DW520166.1 dbest_id:35125949 /TID=GhiAffx.63449.1 /CNT=2 /FEA=EST /TIER=ConsEnd /STK=1 /NOTE=sequence(s) not in UniGene /REP_ORG=
GhiAffx.63656.1.S1_at	DW239385.1	---	3.0784	0	gb:DW239385.1 dbest_id:34843551 /TID=GhiAffx.63656.1 /CNT=2 /FEA=EST /TIER=ConsEnd /STK=0 /NOTE=sequence(s) not in UniGene /REP_ORG=
Ghi.1674.1.S1_x_at	DN760055	Ghi.5243	3.07693	0	gb:DN760055 /DB_XREF=gi:84145813 /DB_XREF=G.hir-stem 2562 /TID=Ghi.1674.1 /CNT=1 /FEA=EST /TIER=ConsEnd /STK=0 /UG=Ghi.1674 /UG_TITLE=Transcribed locus /REP_ORG=G. hirsutum
Gra.328.1.S1_s_at	CO087952	Gra.328	3.0741	0	gb:CO087952 /DB_XREF=gi:48778586 /DB_XREF=GR__Ea06K13.f /CLONE=GR__Ea06K13 /TID=Gra.328.1 /CNT=4 /FEA=EST /TIER=ConsEnd /STK=0 /UG=Gra.328 /UG_TITLE=Transcribed locus, moderately similar to NP_198009.2 glycoside hydrolase starch-binding domain-containing protein (Arabidopsis thaliana) /REP_ORG=G. raimondii
Ghi.2998.2.S1_x_at	DT047256	Ghi.2998	3.074	0.403009	gb:DT047256 /DB_XREF=gi:72269639 /DB_XREF=COT_CL_H06 /TID=Ghi.2998.2 /CNT=10 /FEA=EST /TIER=ConsEnd /STK=1 /UG=Ghi.2998 /UG_TITLE=Transcribed locus, weakly similar to NP_566777.1 AOC2 (ALLENE OXIDE CYCLASE 2) (Arabidopsis thaliana) /REP_ORG=G. hirsutum
Ghi.8587.2.S1_s_at	DT456348	Ghi.8587	3.07068	0	gb:DT456348 /DB_XREF=gi:73847328 /DB_XREF=GH_ON14G04.f /CLONE=GH_ON14G04 /TID=Ghi.8587.2 /CNT=8 /FEA=EST /TIER=ConsEnd /STK=0 /UG=Ghi.8587 /UG_TITLE=Transcribed locus, weakly similar to NP_917200.1 P0707D10.17 (Oryza sativa (japonica cultivar-group)) /REP_ORG=G. hirsutum
GhiAffx.22890.1.S1_s_at	DW503126.1	Ghi.63	3.06966	0	gb:DW503126.1 dbest_id:35107554 /TID=GhiAffx.22890.1 /CNT=2 /FEA=EST /TIER=ConsEnd /STK=1 /NOTE=sequence(s) not in UniGene /REP_ORG=
Ghi.6141.2.S1_at	DR458687	Ghi.6141	3.06675	0	gb:DR458687 /DB_XREF=gi:84170039 /DB_XREF=CM068D04 /TID=Ghi.6141.2 /CNT=1 /FEA=EST /TIER=ConsEnd /STK=0 /UG=Ghi.6141 /UG_TITLE=Transcribed locus, moderately similar to NP_196024.1 unknown protein (Arabidopsis thaliana) /REP_ORG=G. hirsutum
Ghi.5075.1.A1_at	DT049182	Ghi.5075	3.06525	0	gb:DT049182 /DB_XREF=gi:72273494 /DB_XREF=COT_DJ_G04 /TID=Ghi.5075.1 /CNT=1 /FEA=EST /TIER=ConsEnd /STK=1 /UG=Ghi.5075 /UG_TITLE=Transcribed locus /REP_ORG=G. hirsutum
GhiAffx.30938.1.S1_at	DW507778.1	Ghi.13510	3.06508	0	gb:DW507778.1 dbest_id:35113561 /TID=GhiAffx.30938.1 /CNT=4 /FEA=EST /TIER=ConsEnd /STK=0 /NOTE=sequence(s) not in UniGene /REP_ORG=
Ghi.8103.1.S1_at	AY216263.1	Ghi.16477	3.06462	0	gb:AY216263.1 /DB_XREF=gi:30983602 /TID=Ghi.8103.1 /CNT=3 /FEA=FLmRNA /TIER=FL /STK=2 /UG=Ghi.8103 /DEF=Gossypium hirsutum kinesin-like calmodulin binding protein mRNA, complete cds. /PROD=kinesin-like calmodulin binding protein /FL=gb:AY216263.1 /REP_ORG=G. hirsutum
Ghi.3718.1.S1_at	DT462306	Ghi.3718	3.06339	0	gb:DT462306 /DB_XREF=gi:73859567 /DB_XREF=GH_CHX11B10.x /CLONE=GH_CHX11B10 /TID=Ghi.3718.1 /CNT=1 /FEA=EST /TIER=ConsEnd /STK=0 /UG=Ghi.3718 /UG_TITLE=Transcribed locus /REP_ORG=G. hirsutum
Ghi.6669.1.A1_at	CA993743	Ghi.6669	3.05822	0	gb:CA993743 /DB_XREF=gi:31073464 /DB_XREF=pAR10B02 /TID=Ghi.6669.1 /CNT=1 /FEA=EST /TIER=ConsEnd /STK=0 /UG=Ghi.6669 /UG_TITLE=Transcribed locus /REP_ORG=G. hirsutum
Ghi.3560.1.A1_s_at	DT464300	Ghi.3560	3.05345	0	gb:DT464300 /DB_XREF=gi:73861561 /DB_XREF=GH_CHX15G11.r /CLONE=GH_CHX15G11 /TID=Ghi.3560.1 /CNT=2 /FEA=EST /TIER=ConsEnd /STK=1 /UG=Ghi.3560 /UG_TITLE=Transcribed locus, weakly similar to NP_175713.1 ATP binding kinase protein kinase protein serinethreonine kinase protein-tyrosine kinase (Arabidopsis thaliana) /REP_ORG=G. hirsutum
Ghi.9283.3.A1_at	DT464454	Ghi.9283	3.05195	0	gb:DT464454 /DB_XREF=gi:73861715 /DB_XREF=GH_CHX15K18.r /CLONE=GH_CHX15K18 /TID=Ghi.9283.3 /CNT=2 /FEA=EST /TIER=ConsEnd /STK=1 /UG=Ghi.9283 /UG_TITLE=Transcribed locus, weakly similar to XP_483795.1 putative NAC2 protein (Oryza sativa (japonica cultivar-group)) /REP_ORG=G. hirsutum
GhiAffx.41741.1.S1_at	DW504530.1	---	3.05079	0	gb:DW504530.1 dbest_id:35108958 /TID=GhiAffx.41741.1 /CNT=2 /FEA=EST /TIER=ConsEnd /STK=1 /NOTE=sequence(s) not in UniGene /REP_ORG=
Ghi.6983.2.A1_at	DT468489	Ghi.6983	3.04696	0	gb:DT468489 /DB_XREF=gi:73865751 /DB_XREF=GH_CHX21P05.r /CLONE=GH_CHX21P05 /TID=Ghi.6983.2 /CNT=2 /FEA=EST /TIER=ConsEnd /STK=1 /UG=Ghi.6983 /UG_TITLE=Transcribed locus, weakly similar to NP_849630.3 protein prenyltransferase (Arabidopsis thaliana) /REP_ORG=G. hirsutum
Ghi.8329.1.S1_at	AW187347	Ghi.8329	3.0468	0	gb:AW187347 /DB_XREF=gi:6481325 /DB_XREF=BNLGHi13126 /TID=Ghi.8329.1 /CNT=3 /FEA=EST /TIER=ConsEnd /STK=3 /UG=Ghi.8329 /UG_TITLE=Transcribed locus /REP_ORG=G. hirsutum
GhiAffx.52199.1.S1_at	DW510120.1	---	3.04635	0	gb:DW510120.1 dbest_id:35115903 /TID=GhiAffx.52199.1 /CNT=2 /FEA=EST /TIER=ConsEnd /STK=1 /NOTE=sequence(s) not in UniGene /REP_ORG=
Ghi.5573.1.A1_at	DT047289	Ghi.5573	3.04624	0	gb:DT047289 /DB_XREF=gi:72269705 /DB_XREF=COT_CM_C11 /TID=Ghi.5573.1 /CNT=1 /FEA=EST /TIER=ConsEnd /STK=1 /UG=Ghi.5573 /UG_TITLE=Transcribed locus, weakly similar to NP_566518.1 APG8H; microtubule binding (Arabidopsis thaliana) /REP_ORG=G. hirsutum
GraAffx.21555.1.S1_s_at	CO106545	---	3.04565	0	gb:CO106545 /DB_XREF=gi:48805231 /DB_XREF=GR__Eb0037D21.r /CLONE=GR__Eb0037D21 /TID=GraAffx.21555.1 /CNT=2 /FEA=EST /TIER=ConsEnd /STK=1 /NOTE=sequence(s) not in UniGene /REP_ORG=G. raimondii
Ghi.4340.1.A1_at	DT054119	Ghi.4340	3.04425	0	gb:DT054119 /DB_XREF=gi:72283701 /DB_XREF=COT_FZ_A10 /TID=Ghi.4340.1 /CNT=5 /FEA=EST /TIER=ConsEnd /STK=5 /UG=Ghi.4340 /UG_TITLE=Transcribed locus, weakly similar to NP_566802.1 unknown protein (Arabidopsis thaliana) /REP_ORG=G. hirsutum
GhiAffx.3219.1.S1_at	DW504622.1	Ghi.21688	3.04331	0	gb:DW504622.1 dbest_id:35109050 /TID=GhiAffx.3219.1 /CNT=2 /FEA=EST /TIER=ConsEnd /STK=1 /NOTE=sequence(s) not in UniGene /REP_ORG=
Ghi.8207.1.S1_s_at	DT051983	Ghi.17525	3.04327	0.00854976	gb:DT051983 /DB_XREF=gi:72279339 /DB_XREF=COT_ES_F11 /TID=Ghi.8207.1 /CNT=9 /FEA=EST /TIER=ConsEnd /STK=1 /UG=Ghi.8207 /UG_TITLE=Transcribed locus, moderately similar to NP_567791.1 UBC9 (UBIQUITIN CONJUGATING ENZYME 9); ubiquitin conjugating enzyme ubiquitin-like activating enzyme (Arabidopsis thaliana) /REP_ORG=G. hirsutum
GhiAffx.25503.1.S1_at	DW516664.1	Ghi.21996	3.04289	0	gb:DW516664.1 dbest_id:35122447 /TID=GhiAffx.25503.1 /CNT=2 /FEA=EST /TIER=ConsEnd /STK=1 /NOTE=sequence(s) not in UniGene /REP_ORG=
Ghi.3726.2.S1_s_at	DN780079	Ghi.3726	3.04216	0	gb:DN780079 /DB_XREF=gi:84148779 /DB_XREF=G.hir-Cotyledon 607 /TID=Ghi.3726.2 /CNT=2 /FEA=EST /TIER=ConsEnd /STK=0 /UG=Ghi.3726 /UG_TITLE=Transcribed locus, weakly similar to NP_851141.1 RNA binding nucleic acid binding (Arabidopsis thaliana) /REP_ORG=G. hirsutum
Ghi.3402.1.S1_at	DT461979	Ghi.3402	3.04211	0	gb:DT461979 /DB_XREF=gi:73859240 /DB_XREF=GH_CHX07B06.x /CLONE=GH_CHX07B06 /TID=Ghi.3402.1 /CNT=3 /FEA=EST /TIER=ConsEnd /STK=0 /UG=Ghi.3402 /UG_TITLE=Transcribed locus, weakly similar to NP_565618.1 calmodulin binding (Arabidopsis thaliana) /REP_ORG=G. hirsutum
Ghi.4791.2.S1_at	DT462585	Ghi.4791	3.04153	0	gb:DT462585 /DB_XREF=gi:73859846 /DB_XREF=GH_CHX12E24.r /CLONE=GH_CHX12E24 /TID=Ghi.4791.2 /CNT=2 /FEA=EST /TIER=ConsEnd /STK=1 /UG=Ghi.4791 /UG_TITLE=Transcribed locus, weakly similar to NP_565074.1 calmodulin binding (Arabidopsis thaliana) /REP_ORG=G. hirsutum
Ghi.4160.1.S1_at	DT456400	Ghi.4160	3.04097	0	gb:DT456400 /DB_XREF=gi:73847380 /DB_XREF=GH_ON15D02.f /CLONE=GH_ON15D02 /TID=Ghi.4160.1 /CNT=3 /FEA=EST /TIER=ConsEnd /STK=0 /UG=Ghi.4160 /UG_TITLE=Transcribed locus /REP_ORG=G. hirsutum
Ghi.4172.1.S1_at	DT456289	Ghi.4172	3.04018	0	gb:DT456289 /DB_XREF=gi:73847269 /DB_XREF=GH_ON14A03.f /CLONE=GH_ON14A03 /TID=Ghi.4172.1 /CNT=2 /FEA=EST /TIER=ConsEnd /STK=0 /UG=Ghi.4172 /UG_TITLE=Transcribed locus, moderately similar to NP_172234.1 TRFL2 (TRF-LIKE 2); DNA binding (Arabidopsis thaliana) /REP_ORG=G. hirsutum
Ghi.2026.1.S1_s_at	DT461256	Ghi.2026	3.04008	0	gb:DT461256 /DB_XREF=gi:73852236 /DB_XREF=GH_ON40J23.r /CLONE=GH_ON40J23 /TID=Ghi.2026.1 /CNT=4 /FEA=EST /TIER=ConsEnd /STK=1 /UG=Ghi.2026 /UG_TITLE=Transcribed locus, strongly similar to NP_176659.2 unknown protein (Arabidopsis thaliana) /REP_ORG=G. hirsutum
GraAffx.31884.1.S1_s_at	CO076464	---	3.03823	0	gb:CO076464 /DB_XREF=gi:48745945 /DB_XREF=GR__Ea37N04.f /CLONE=GR__Ea37N04 /TID=GraAffx.31884.1 /CNT=2 /FEA=EST /TIER=ConsEnd /STK=1 /NOTE=sequence(s) not in UniGene /REP_ORG=G. raimondii
Gra.1162.1.S1_s_at	CO090799	Gra.1162	3.0352	0	gb:CO090799 /DB_XREF=gi:48789485 /DB_XREF=GR__Ea10P10.f /CLONE=GR__Ea10P10 /TID=Gra.1162.1 /CNT=3 /FEA=EST /TIER=ConsEnd /STK=0 /UG=Gra.1162 /UG_TITLE=Transcribed locus, weakly similar to NP_175862.1 protein kinase family protein (Arabidopsis thaliana) /REP_ORG=G. raimondii
Gra.2773.1.S1_s_at	CO084045	Gra.2773	3.03326	0	gb:CO084045 /DB_XREF=gi:48753526 /DB_XREF=GR__Ea49G22.f /CLONE=GR__Ea49G22 /TID=Gra.2773.1 /CNT=7 /FEA=EST /TIER=ConsEnd /STK=0 /UG=Gra.2773 /UG_TITLE=Transcribed locus, moderately similar to NP_177239.1 phosphoglucomutase, putative glucose phosphomutase, putative (Arabidopsis thaliana) /REP_ORG=G. raimondii
Ghi.5506.1.S1_a_at	DR459194	Ghi.5506	3.03187	0	gb:DR459194 /DB_XREF=gi:84170546 /DB_XREF=CM073G03 /TID=Ghi.5506.1 /CNT=14 /FEA=EST /TIER=ConsEnd /STK=0 /UG=Ghi.5506 /UG_TITLE=Transcribed locus, weakly similar to NP_568521.1 unknown protein (Arabidopsis thaliana) /REP_ORG=G. hirsutum
Gra.1436.4.A1_s_at	CO126264	---	3.03121	0	gb:CO126264 /DB_XREF=gi:48827874 /DB_XREF=GR__Eb10D03.r /CLONE=GR__Eb10D03 /TID=Gra.1436.4 /CNT=1 /FEA=EST /TIER=ConsEnd /STK=1 /UG=Gra.1436 /UG_TITLE=Transcribed locus, moderately similar to NP_177775.1 3-hydroxy-3-methylglutaryl-CoA reductase 1 HMG-CoA reductase 1 (HMG1) (Arabidopsis thaliana) /REP_ORG=G. raimondii
Ghi.6251.1.A1_at	DT051131	Ghi.6251	3.03013	0	gb:DT051131 /DB_XREF=gi:72277425 /DB_XREF=COT_EI_C05 /TID=Ghi.6251.1 /CNT=9 /FEA=EST /TIER=ConsEnd /STK=2 /UG=Ghi.6251 /UG_TITLE=Transcribed locus, moderately similar to NP_564354.1 unknown protein (Arabidopsis thaliana) /REP_ORG=G. hirsutum
Ghi.3748.1.A1_at	DT462042	Ghi.3748	3.02852	0	gb:DT462042 /DB_XREF=gi:73859303 /DB_XREF=GH_CHX07H09.x /CLONE=GH_CHX07H09 /TID=Ghi.3748.1 /CNT=1 /FEA=EST /TIER=ConsEnd /STK=1 /UG=Ghi.3748 /UG_TITLE=Transcribed locus, weakly similar to NP_922763.1 putative phosphatidylinositol-4-phosphate 5-kinase (Oryza sativa (japonica cultivar-group)) /REP_ORG=G. hirsutum
Ghi.4960.2.A1_s_at	DT046397	Ghi.4960	3.02747	0.0627412	gb:DT046397 /DB_XREF=gi:72267697 /DB_XREF=COT_AA_D01 /TID=Ghi.4960.2 /CNT=1 /FEA=EST /TIER=ConsEnd /STK=1 /UG=Ghi.4960 /UG_TITLE=Transcribed locus, moderately similar to NP_194504.2 unknown protein (Arabidopsis thaliana) /REP_ORG=G. hirsutum
Ghi.7413.1.S1_s_at	DT463064	Ghi.7413	3.02672	0	gb:DT463064 /DB_XREF=gi:73860325 /DB_XREF=GH_CHX13A04.r /CLONE=GH_CHX13A04 /TID=Ghi.7413.1 /CNT=6 /FEA=EST /TIER=ConsEnd /STK=0 /UG=Ghi.7413 /UG_TITLE=Transcribed locus, moderately similar to NP_180196.1 CID7; ATP binding damaged DNA binding (Arabidopsis thaliana) /REP_ORG=G. hirsutum
GhiAffx.12901.1.S1_at	DT463795	---	3.02534	0	gb:DT463795 /DB_XREF=gi:73861056 /DB_XREF=GH_CHX14C14.r /CLONE=GH_CHX14C14 /TID=GhiAffx.12901.1 /CNT=2 /FEA=EST /TIER=ConsEnd /STK=1 /NOTE=sequence(s) not in UniGene /REP_ORG=G. hirsutum
Ghi.5983.2.S1_s_at	DT458028	Ghi.5983	3.02171	0	gb:DT458028 /DB_XREF=gi:73849008 /DB_XREF=GH_ON35H13.f /CLONE=GH_ON35H13 /TID=Ghi.5983.2 /CNT=3 /FEA=EST /TIER=ConsEnd /STK=0 /UG=Ghi.5983 /UG_TITLE=Transcribed locus, weakly similar to NP_917783.1 P0006C01.20 (Oryza sativa (japonica cultivar-group)) /REP_ORG=G. hirsutum
Ghi.5080.1.A1_at	DT468056	Ghi.5080	3.02111	0	gb:DT468056 /DB_XREF=gi:73865318 /DB_XREF=GH_CHX21F07.r /CLONE=GH_CHX21F07 /TID=Ghi.5080.1 /CNT=4 /FEA=EST /TIER=ConsEnd /STK=0 /UG=Ghi.5080 /UG_TITLE=Transcribed locus, weakly similar to NP_180068.1 unknown protein (Arabidopsis thaliana) /REP_ORG=G. hirsutum
Ghi.2969.1.S1_at	DT462143	Ghi.2969	3.0189	0.0238141	gb:DT462143 /DB_XREF=gi:73859404 /DB_XREF=GH_CHX09B12.x /CLONE=GH_CHX09B12 /TID=Ghi.2969.1 /CNT=4 /FEA=EST /TIER=ConsEnd /STK=0 /UG=Ghi.2969 /UG_TITLE=Transcribed locus /REP_ORG=G. hirsutum
Ghi.3566.2.A1_s_at	DT464228	Ghi.3566	3.01827	0	gb:DT464228 /DB_XREF=gi:73861489 /DB_XREF=GH_CHX15E12.r /CLONE=GH_CHX15E12 /TID=Ghi.3566.2 /CNT=2 /FEA=EST /TIER=ConsEnd /STK=0 /UG=Ghi.3566 /UG_TITLE=Transcribed locus, weakly similar to NP_197638.1 catalytic (Arabidopsis thaliana) /REP_ORG=G. hirsutum
Ghi.5646.1.A1_s_at	DT047014	Ghi.5646	3.01696	0	gb:DT047014 /DB_XREF=gi:72269144 /DB_XREF=COT_CI_H01 /TID=Ghi.5646.1 /CNT=1 /FEA=EST /TIER=ConsEnd /STK=1 /UG=Ghi.5646 /UG_TITLE=Transcribed locus, weakly similar to NP_172535.1 unknown protein (Arabidopsis thaliana) /REP_ORG=G. hirsutum
GhiAffx.5983.1.A1_s_at	DW238025.1	Ghi.4037	3.01696	0	gb:DW238025.1 dbest_id:34842191 /TID=GhiAffx.5983.1 /CNT=1 /FEA=EST /TIER=ConsEnd /STK=1 /NOTE=sequence(s) not in UniGene /REP_ORG=
GhiAffx.3708.1.A1_s_at	DR457956	Ghi.16009	3.01508	0	gb:DR457956 /DB_XREF=gi:84169308 /DB_XREF=CM060F10 /TID=GhiAffx.3708.1 /CNT=4 /FEA=EST /TIER=ConsEnd /STK=0 /NOTE=sequence(s) not in UniGene /REP_ORG=G. hirsutum
Ghi.4873.1.A1_at	DT050104	Ghi.4873	3.01358	0	gb:DT050104 /DB_XREF=gi:72275382 /DB_XREF=COT_DV_C07 /TID=Ghi.4873.1 /CNT=1 /FEA=EST /TIER=ConsEnd /STK=1 /UG=Ghi.4873 /UG_TITLE=Transcribed locus, weakly similar to NP_172636.1 unknown protein (Arabidopsis thaliana) /REP_ORG=G. hirsutum
Ghi.5055.1.S1_at	DT049274	Ghi.5055	3.01252	0	gb:DT049274 /DB_XREF=gi:72273675 /DB_XREF=COT_DK_H02 /TID=Ghi.5055.1 /CNT=2 /FEA=EST /TIER=ConsEnd /STK=1 /UG=Ghi.5055 /UG_TITLE=Transcribed locus /REP_ORG=G. hirsutum
Ghi.4358.1.A1_at	DT053995	Ghi.4358	3.0125	0.0333442	gb:DT053995 /DB_XREF=gi:72283455 /DB_XREF=COT_FX_D10 /TID=Ghi.4358.1 /CNT=4 /FEA=EST /TIER=ConsEnd /STK=4 /UG=Ghi.4358 /UG_TITLE=Transcribed locus, moderately similar to XP_467400.1 putative kinesin light chain (Oryza sativa (japonica cultivar-group)) /REP_ORG=G. hirsutum
Ghi.4896.1.A1_at	DT049990	Ghi.14346	3.01235	0	gb:DT049990 /DB_XREF=gi:72275126 /DB_XREF=COT_DT_G07 /TID=Ghi.4896.1 /CNT=3 /FEA=EST /TIER=ConsEnd /STK=1 /UG=Ghi.4896 /UG_TITLE=Transcribed locus, moderately similar to NP_178112.1 heat shock protein binding unfolded protein binding (Arabidopsis thaliana) /REP_ORG=G. hirsutum
Ghi.1022.1.S1_x_at	DT467657	Ghi.1022	3.01226	0	gb:DT467657 /DB_XREF=gi:73864918 /DB_XREF=GH_CHX20M01.r /CLONE=GH_CHX20M01 /TID=Ghi.1022.1 /CNT=5 /FEA=EST /TIER=ConsEnd /STK=1 /UG=Ghi.1022 /UG_TITLE=Transcribed locus, weakly similar to NP_194922.1 CYP82C4; heme binding iron ion binding monooxygenase oxygen binding (Arabidopsis thaliana) /REP_ORG=G. hirsutum
GhiAffx.19212.1.S1_at	DW240158.1	Ghi.14611	3.01204	0	gb:DW240158.1 dbest_id:34844324 /TID=GhiAffx.19212.1 /CNT=5 /FEA=EST /TIER=ConsEnd /STK=1 /NOTE=sequence(s) not in UniGene /REP_ORG=
Ghi.6167.1.S1_at	DR452924	Ghi.6167	3.01063	0	gb:DR452924 /DB_XREF=gi:84164276 /DB_XREF=CM007G09 /TID=Ghi.6167.1 /CNT=4 /FEA=EST /TIER=ConsEnd /STK=0 /UG=Ghi.6167 /UG_TITLE=Transcribed locus, moderately similar to NP_191136.1 zinc ion binding (Arabidopsis thaliana) /REP_ORG=G. hirsutum
Ghi.4110.1.S1_s_at	DT457843	Ghi.4110	3.01021	0.168033	gb:DT457843 /DB_XREF=gi:73848823 /DB_XREF=GH_ON35C17.r /CLONE=GH_ON35C17 /TID=Ghi.4110.1 /CNT=2 /FEA=EST /TIER=ConsEnd /STK=1 /UG=Ghi.4110 /UG_TITLE=Transcribed locus, weakly similar to NP_201063.2 calmodulin binding (Arabidopsis thaliana) /REP_ORG=G. hirsutum
Ghi.9179.3.S1_at	DT464967	Ghi.17883	3.01016	0	gb:DT464967 /DB_XREF=gi:73862228 /DB_XREF=GH_CHX16J03.f /CLONE=GH_CHX16J03 /TID=Ghi.9179.3 /CNT=2 /FEA=EST /TIER=ConsEnd /STK=0 /UG=Ghi.9179 /UG_TITLE=Transcribed locus, weakly similar to NP_919802.1 putative polyprotein (Oryza sativa (japonica cultivar-group)) /REP_ORG=G. hirsutum
Ghi.1836.1.S1_s_at	DV849537	Ghi.1836	3.00953	0	gb:DV849537 /DB_XREF=gi:82755975 /DB_XREF=GH_LSL21F09.f /CLONE=GH_LSL21F09 /TID=Ghi.1836.1 /CNT=2 /FEA=EST /TIER=ConsEnd /STK=0 /UG=Ghi.1836 /UG_TITLE=Transcribed locus, moderately similar to NP_568653.1 unknown protein (Arabidopsis thaliana) /REP_ORG=G. hirsutum
Ghi.3185.1.A1_at	DT461063	Ghi.3185	3.00846	0	gb:DT461063 /DB_XREF=gi:73852043 /DB_XREF=GH_ON40E19.r /CLONE=GH_ON40E19 /TID=Ghi.3185.1 /CNT=1 /FEA=EST /TIER=ConsEnd /STK=1 /UG=Ghi.3185 /UG_TITLE=Transcribed locus /REP_ORG=G. hirsutum
Ghi.10117.3.A1_s_at	DT462483	Ghi.13565	3.00674	0	gb:DT462483 /DB_XREF=gi:73859744 /DB_XREF=GH_CHX12C13.r /CLONE=GH_CHX12C13 /TID=Ghi.10117.3 /CNT=1 /FEA=EST /TIER=ConsEnd /STK=1 /UG=Ghi.10117 /UG_TITLE=Transcribed locus, weakly similar to NP_850981.1 aspartic-type endopeptidase pepsin A (Arabidopsis thaliana) /REP_ORG=G. hirsutum
Ghi.6858.1.A1_at	CA992853	Ghi.6858	3.00649	0.0366566	gb:CA992853 /DB_XREF=gi:31072574 /DB_XREF=pAR03-2 /TID=Ghi.6858.1 /CNT=2 /FEA=EST /TIER=ConsEnd /STK=0 /UG=Ghi.6858 /UG_TITLE=Transcribed locus, moderately similar to NP_195815.2 ATP binding kinase protein serinethreonine kinase (Arabidopsis thaliana) /REP_ORG=G. hirsutum
Ghi.4417.1.A1_at	DT053313	Ghi.4417	3.00586	0	gb:DT053313 /DB_XREF=gi:72282103 /DB_XREF=COT_FN_G03 /TID=Ghi.4417.1 /CNT=7 /FEA=EST /TIER=Stack /STK=7 /UG=Ghi.4417 /UG_TITLE=Transcribed locus /REP_ORG=G. hirsutum
GhiAffx.40839.1.S1_at	DW499830.1	---	3.00576	0	gb:DW499830.1 dbest_id:35104258 /TID=GhiAffx.40839.1 /CNT=2 /FEA=EST /TIER=ConsEnd /STK=0 /NOTE=sequence(s) not in UniGene /REP_ORG=
GhiAffx.42284.3.S1_at	DW510944.1	---	3.00548	0	gb:DW510944.1 dbest_id:35116727 /TID=GhiAffx.42284.3 /CNT=2 /FEA=EST /TIER=ConsEnd /STK=1 /NOTE=sequence(s) not in UniGene /REP_ORG=
Ghi.4222.1.S1_at	DT456468	Ghi.4222	3.00533	0	gb:DT456468 /DB_XREF=gi:73847448 /DB_XREF=GH_ON16C01.f /CLONE=GH_ON16C01 /TID=Ghi.4222.1 /CNT=6 /FEA=EST /TIER=ConsEnd /STK=0 /UG=Ghi.4222 /UG_TITLE=Transcribed locus /REP_ORG=G. hirsutum
Ghi.5055.1.A1_s_at	DT054254	Ghi.5055	3.00515	0	gb:DT054254 /DB_XREF=gi:72283971 /DB_XREF=NHF01_F06 /CLONE=COT_DK_H02 /TID=Ghi.5055.1 /CNT=2 /FEA=EST /TIER=ConsEnd /STK=1 /UG=Ghi.5055 /UG_TITLE=Transcribed locus /REP_ORG=G. hirsutum
Gra.1143.1.A1_s_at	CO109863	Gra.1143	3.00473	0	gb:CO109863 /DB_XREF=gi:48808549 /DB_XREF=GR__Eb0042H18.r /CLONE=GR__Eb0042H18 /TID=Gra.1143.1 /CNT=2 /FEA=EST /TIER=ConsEnd /STK=1 /UG=Gra.1143 /UG_TITLE=Transcribed locus, weakly similar to NP_195410.1 floral homeotic protein APETALA2 (AP2) (Arabidopsis thaliana) /REP_ORG=G. raimondii
Ghi.3596.3.S1_at	DT465566	Ghi.3596	3.00412	0.00854976	gb:DT465566 /DB_XREF=gi:73862827 /DB_XREF=GH_CHX17J04.f /CLONE=GH_CHX17J04 /TID=Ghi.3596.3 /CNT=2 /FEA=EST /TIER=ConsEnd /STK=0 /UG=Ghi.3596 /UG_TITLE=Transcribed locus, moderately similar to NP_564504.1 catalytic protein phosphatase type 2C (Arabidopsis thaliana) /REP_ORG=G. hirsutum
GhiAffx.28367.1.S1_at	DW235888.1	Ghi.20593	3.00352	0	gb:DW235888.1 dbest_id:34840054 /TID=GhiAffx.28367.1 /CNT=2 /FEA=EST /TIER=ConsEnd /STK=1 /NOTE=sequence(s) not in UniGene /REP_ORG=
Ghi.1889.1.S1_at	DV849586	Ghi.1889	3.00349	0.0480414	gb:DV849586 /DB_XREF=gi:82756024 /DB_XREF=GH_LSL22C02.f /CLONE=GH_LSL22C02 /TID=Ghi.1889.1 /CNT=1 /FEA=EST /TIER=ConsEnd /STK=0 /UG=Ghi.1889 /UG_TITLE=Transcribed locus, weakly similar to NP_563660.1 triacylglycerol lipase (Arabidopsis thaliana) /REP_ORG=G. hirsutum
GhiAffx.12778.1.S1_at	DT465271	Ghi.19604	3.00189	0	gb:DT465271 /DB_XREF=gi:73862532 /DB_XREF=GH_CHX17B06.r /CLONE=GH_CHX17B06 /TID=GhiAffx.12778.1 /CNT=2 /FEA=EST /TIER=ConsEnd /STK=1 /NOTE=sequence(s) not in UniGene /REP_ORG=G. hirsutum
GhiAffx.33946.1.A1_s_at	DW506962.1	Ghi.3339	2.9997	0	gb:DW506962.1 dbest_id:35112745 /TID=GhiAffx.33946.1 /CNT=2 /FEA=EST /TIER=ConsEnd /STK=0 /NOTE=sequence(s) not in UniGene /REP_ORG=
GraAffx.7230.1.S1_at	CO097003	---	2.99834	0	gb:CO097003 /DB_XREF=gi:48795689 /DB_XREF=GR__Ea20J21.r /CLONE=GR__Ea20J21 /TID=GraAffx.7230.1 /CNT=3 /FEA=EST /TIER=ConsEnd /STK=1 /NOTE=sequence(s) not in UniGene /REP_ORG=G. raimondii
Ghi.5089.1.A1_s_at	DT049137	Ghi.5089	2.99774	0	gb:DT049137 /DB_XREF=gi:72273404 /DB_XREF=COT_DJ_C03 /TID=Ghi.5089.1 /CNT=1 /FEA=EST /TIER=ConsEnd /STK=1 /UG=Ghi.5089 /UG_TITLE=Transcribed locus /REP_ORG=G. hirsutum
Ghi.497.1.S1_at	DR458886	Ghi.497	2.99675	0	gb:DR458886 /DB_XREF=gi:84170238 /DB_XREF=CM070E04 /TID=Ghi.497.1 /CNT=1 /FEA=EST /TIER=ConsEnd /STK=0 /UG=Ghi.497 /UG_TITLE=Transcribed locus, weakly similar to NP_187552.3 carboxylic ester hydrolase (Arabidopsis thaliana) /REP_ORG=G. hirsutum
Ghi.9470.1.S1_s_at	DT465281	Ghi.9072	2.99454	0	gb:DT465281 /DB_XREF=gi:73862542 /DB_XREF=GH_CHX17B14.f /CLONE=GH_CHX17B14 /TID=Ghi.9470.1 /CNT=3 /FEA=EST /TIER=ConsEnd /STK=0 /UG=Ghi.9470 /UG_TITLE=Transcribed locus, moderately similar to NP_567245.1 DNA binding transcription factor (Arabidopsis thaliana) /REP_ORG=G. hirsutum
Ghi.4916.2.A1_at	DT459570	Ghi.4916	2.99149	0	gb:DT459570 /DB_XREF=gi:73850550 /DB_XREF=GH_ON37N23.r /CLONE=GH_ON37N23 /TID=Ghi.4916.2 /CNT=2 /FEA=EST /TIER=ConsEnd /STK=0 /UG=Ghi.4916 /UG_TITLE=Transcribed locus, weakly similar to XP_479904.1 putative bromodomain-containing protein (Oryza sativa (japonica cultivar-group)) /REP_ORG=G. hirsutum
GhiAffx.12663.1.S1_s_at	DW232933.1	---	2.99142	0	gb:DW232933.1 dbest_id:34837099 /TID=GhiAffx.12663.1 /CNT=2 /FEA=EST /TIER=ConsEnd /STK=1 /NOTE=sequence(s) not in UniGene /REP_ORG=
GhiAffx.2081.1.S1_s_at	DW233879.1	Ghi.13651	2.99125	0	gb:DW233879.1 dbest_id:34838045 /TID=GhiAffx.2081.1 /CNT=4 /FEA=EST /TIER=ConsEnd /STK=0 /NOTE=sequence(s) not in UniGene /REP_ORG=
Ghi.4160.1.A1_at	DT457186	Ghi.4160	2.98914	0	gb:DT457186 /DB_XREF=gi:73848166 /DB_XREF=GH_ON34C21.r /CLONE=GH_ON34C21 /TID=Ghi.4160.1 /CNT=3 /FEA=EST /TIER=ConsEnd /STK=1 /UG=Ghi.4160 /UG_TITLE=Transcribed locus /REP_ORG=G. hirsutum
Ghi.1922.1.S1_at	DV849103	Ghi.1922	2.9865	0	gb:DV849103 /DB_XREF=gi:82755541 /DB_XREF=GH_LSL06H05.f /CLONE=GH_LSL06H05 /TID=Ghi.1922.1 /CNT=1 /FEA=EST /TIER=ConsEnd /STK=1 /UG=Ghi.1922 /UG_TITLE=Transcribed locus /REP_ORG=G. hirsutum
GhiAffx.4741.1.S1_s_at	DW512252.1	Ghi.21897	2.98639	0	gb:DW512252.1 dbest_id:35118035 /TID=GhiAffx.4741.1 /CNT=2 /FEA=EST /TIER=ConsEnd /STK=1 /NOTE=sequence(s) not in UniGene /REP_ORG=
GhiAffx.16735.1.S1_at	DT049232	Ghi.16041	2.98628	0	gb:DT049232 /DB_XREF=gi:72273592 /DB_XREF=COT_DK_D04 /TID=GhiAffx.16735.1 /CNT=7 /FEA=EST /TIER=ConsEnd /STK=1 /NOTE=sequence(s) not in UniGene /REP_ORG=G. hirsutum
GhiAffx.30912.1.S1_at	DT469104	Ghi.4017	2.98437	0	gb:DT469104 /DB_XREF=gi:73866366 /DB_XREF=GH_CHX22P14.r /CLONE=GH_CHX22P14 /TID=GhiAffx.30912.1 /CNT=2 /FEA=EST /TIER=ConsEnd /STK=0 /NOTE=sequence(s) not in UniGene /REP_ORG=G. hirsutum
GhiAffx.17182.1.S1_at	DW520187.1	Ghi.14649	2.98184	0	gb:DW520187.1 dbest_id:35125970 /TID=GhiAffx.17182.1 /CNT=5 /FEA=EST /TIER=ConsEnd /STK=0 /NOTE=sequence(s) not in UniGene /REP_ORG=
Ghi.8583.1.S1_s_at	CO494575	Ghi.8583	2.9812	0	gb:CO494575 /DB_XREF=gi:54119066 /DB_XREF=G.h.fbr-sw03965 /TID=Ghi.8583.1 /CNT=6 /FEA=EST /TIER=ConsEnd /STK=0 /UG=Ghi.8583 /UG_TITLE=Transcribed locus, weakly similar to XP_466975.1 unknown protein (Oryza sativa (japonica cultivar-group)) /REP_ORG=G. hirsutum
Ghi.4583.1.A1_at	DT052123	Ghi.4583	2.98072	0	gb:DT052123 /DB_XREF=gi:72279618 /DB_XREF=COT_EU_C03 /TID=Ghi.4583.1 /CNT=5 /FEA=EST /TIER=ConsEnd /STK=2 /UG=Ghi.4583 /UG_TITLE=Transcribed locus /REP_ORG=G. hirsutum
Ghi.6536.1.S1_at	CD485962	Ghi.6536	2.97986	0	gb:CD485962 /DB_XREF=gi:31406927 /DB_XREF=CFUS5.1C06 /CLONE=CFUS5.1C06 /TID=Ghi.6536.1 /CNT=1 /FEA=EST /TIER=ConsEnd /STK=0 /UG=Ghi.6536 /UG_TITLE=Transcribed locus /REP_ORG=G. hirsutum
GhiAffx.44610.1.S1_s_at	DW519438.1	Ghi.13619	2.97975	0	gb:DW519438.1 dbest_id:35125221 /TID=GhiAffx.44610.1 /CNT=5 /FEA=EST /TIER=ConsEnd /STK=0 /NOTE=sequence(s) not in UniGene /REP_ORG=
Ghi.2294.4.A1_at	DT460136	Ghi.17773	2.97929	0.00854976	gb:DT460136 /DB_XREF=gi:73851116 /DB_XREF=GH_ON38N05.r /CLONE=GH_ON38N05 /TID=Ghi.2294.4 /CNT=3 /FEA=EST /TIER=ConsEnd /STK=1 /UG=Ghi.2294 /UG_TITLE=Transcribed locus, strongly similar to NP_176768.1 isocitrate dehydrogenase (NADP+) oxidoreductase (Arabidopsis thaliana) /REP_ORG=G. hirsutum
Ghi.3774.1.A1_at	DT461890	Ghi.3774	2.97831	0	gb:DT461890 /DB_XREF=gi:73859151 /DB_XREF=GH_CHX05H08.x /CLONE=GH_CHX05H08 /TID=Ghi.3774.1 /CNT=1 /FEA=EST /TIER=ConsEnd /STK=0 /UG=Ghi.3774 /UG_TITLE=Transcribed locus, weakly similar to NP_564709.1 ATP binding protein binding protein kinase protein serinethreonine kinase protein-tyrosine kinase (Arabidopsis thaliana) /REP_ORG=G. hirsutum
Ghi.545.1.S1_at	DR458038	Ghi.545	2.97563	0	gb:DR458038 /DB_XREF=gi:84169390 /DB_XREF=CM061E08 /TID=Ghi.545.1 /CNT=1 /FEA=EST /TIER=ConsEnd /STK=0 /UG=Ghi.545 /UG_TITLE=Transcribed locus, weakly similar to NP_566804.3 MSH2 (MUTS HOMOLOG 2); ATP binding damaged DNA binding (Arabidopsis thaliana) /REP_ORG=G. hirsutum
GhiAffx.24966.1.A1_a_at	DW518909.1	Ghi.18543	2.97147	0	gb:DW518909.1 dbest_id:35124692 /TID=GhiAffx.24966.1 /CNT=4 /FEA=EST /TIER=ConsEnd /STK=1 /NOTE=sequence(s) not in UniGene /REP_ORG=
Ghi.6900.2.A1_s_at	CA992710	Ghi.6900	2.96998	0	gb:CA992710 /DB_XREF=gi:31072431 /DB_XREF=pAR01-21 /TID=Ghi.6900.2 /CNT=2 /FEA=EST /TIER=ConsEnd /STK=0 /UG=Ghi.6900 /UG_TITLE=Transcribed locus, moderately similar to XP_480212.1 WD-40 repeat protein-like (Oryza sativa (japonica cultivar-group)) /REP_ORG=G. hirsutum
Ghi.823.1.A1_at	DR454428	Ghi.823	2.96902	0.0627412	gb:DR454428 /DB_XREF=gi:84165780 /DB_XREF=CM023F09 /TID=Ghi.823.1 /CNT=1 /FEA=EST /TIER=ConsEnd /STK=0 /UG=Ghi.823 /UG_TITLE=Transcribed locus /REP_ORG=G. hirsutum
Ghi.8569.1.A1_at	CO496919	Ghi.8569	2.96741	0	gb:CO496919 /DB_XREF=gi:54121410 /DB_XREF=G.h.fbr-sw06309 /TID=Ghi.8569.1 /CNT=56 /FEA=EST /TIER=ConsEnd /STK=0 /UG=Ghi.8569 /UG_TITLE=Transcribed locus, moderately similar to NP_567685.1 unknown protein (Arabidopsis thaliana) /REP_ORG=G. hirsutum
GhiAffx.2128.1.A1_at	DT468334	Ghi.16534	2.96639	0	gb:DT468334 /DB_XREF=gi:73865596 /DB_XREF=GH_CHX21L14.r /CLONE=GH_CHX21L14 /TID=GhiAffx.2128.1 /CNT=2 /FEA=EST /TIER=ConsEnd /STK=1 /NOTE=sequence(s) not in UniGene /REP_ORG=G. hirsutum
GhiAffx.50906.1.S1_at	DT047552	Ghi.13852	2.96528	0	gb:DT047552 /DB_XREF=gi:72270232 /DB_XREF=COT_CP_D07 /TID=GhiAffx.50906.1 /CNT=4 /FEA=EST /TIER=ConsEnd /STK=2 /NOTE=sequence(s) not in UniGene /REP_ORG=G. hirsutum
Ghi.1719.1.S1_at	DN759736	Ghi.1719	2.96418	0	gb:DN759736 /DB_XREF=gi:84145494 /DB_XREF=G.hir-stem 2240 /TID=Ghi.1719.1 /CNT=1 /FEA=EST /TIER=ConsEnd /STK=0 /UG=Ghi.1719 /UG_TITLE=Transcribed locus /REP_ORG=G. hirsutum
GhiAffx.6653.1.A1_at	DW502925.1	Ghi.21650	2.96028	0	gb:DW502925.1 dbest_id:35107353 /TID=GhiAffx.6653.1 /CNT=2 /FEA=EST /TIER=ConsEnd /STK=0 /NOTE=sequence(s) not in UniGene /REP_ORG=
Ghi.870.4.A1_at	DT050541	Ghi.870	2.95974	0	gb:DT050541 /DB_XREF=gi:72276250 /DB_XREF=COT_EA_G03 /TID=Ghi.870.4 /CNT=2 /FEA=EST /TIER=ConsEnd /STK=0 /UG=Ghi.870 /UG_TITLE=Transcribed locus, moderately similar to NP_197059.1 nucleotide binding (Arabidopsis thaliana) /REP_ORG=G. hirsutum
Ghi.9359.1.S1_at	DT469015	Ghi.9359	2.95959	0.0480414	gb:DT469015 /DB_XREF=gi:73866277 /DB_XREF=GH_CHX22N01.r /CLONE=GH_CHX22N01 /TID=Ghi.9359.1 /CNT=16 /FEA=EST /TIER=ConsEnd /STK=0 /UG=Ghi.9359 /UG_TITLE=Transcribed locus /REP_ORG=G. hirsutum
Ghi.4565.1.S1_s_at	DT052272	Ghi.4565	2.95897	0	gb:DT052272 /DB_XREF=gi:72279915 /DB_XREF=COT_EV_H07 /TID=Ghi.4565.1 /CNT=7 /FEA=EST /TIER=ConsEnd /STK=3 /UG=Ghi.4565 /UG_TITLE=Transcribed locus, moderately similar to NP_566511.1 unknown protein (Arabidopsis thaliana) /REP_ORG=G. hirsutum
GhiAffx.59512.1.S1_at	DW509523.1	---	2.95581	0	gb:DW509523.1 dbest_id:35115306 /TID=GhiAffx.59512.1 /CNT=2 /FEA=EST /TIER=ConsEnd /STK=0 /NOTE=sequence(s) not in UniGene /REP_ORG=
Ghi.415.1.S1_s_at	DR459785	Ghi.16759	2.95461	0	gb:DR459785 /DB_XREF=gi:84171137 /DB_XREF=CM079H11 /TID=Ghi.415.1 /CNT=1 /FEA=EST /TIER=ConsEnd /STK=0 /UG=Ghi.415 /UG_TITLE=Transcribed locus, moderately similar to NP_194116.1 catalytic (Arabidopsis thaliana) /REP_ORG=G. hirsutum
Ghi.7191.1.S1_at	AW187282	Ghi.7191	2.95241	0	gb:AW187282 /DB_XREF=gi:6461718 /DB_XREF=BNLGHi12356 /TID=Ghi.7191.1 /CNT=1 /FEA=EST /TIER=ConsEnd /STK=0 /UG=Ghi.7191 /UG_TITLE=Transcribed locus /REP_ORG=G. hirsutum
GhiAffx.48166.1.S1_at	DW504026.1	Ghi.13072	2.9524	0	gb:DW504026.1 dbest_id:35108454 /TID=GhiAffx.48166.1 /CNT=3 /FEA=EST /TIER=ConsEnd /STK=0 /NOTE=sequence(s) not in UniGene /REP_ORG=
Ghi.3146.1.A1_at	DT469027	Ghi.3146	2.95234	0.0480414	gb:DT469027 /DB_XREF=gi:73866289 /DB_XREF=GH_CHX22N09.r /CLONE=GH_CHX22N09 /TID=Ghi.3146.1 /CNT=1 /FEA=EST /TIER=ConsEnd /STK=1 /UG=Ghi.3146 /UG_TITLE=Transcribed locus, moderately similar to NP_567808.1 catalytic protein phosphatase type 2C (Arabidopsis thaliana) /REP_ORG=G. hirsutum
Gra.433.1.S1_s_at	CO099661	Gra.433	2.95226	0	gb:CO099661 /DB_XREF=gi:48798347 /DB_XREF=GR__Ea24K19.r /CLONE=GR__Ea24K19 /TID=Gra.433.1 /CNT=4 /FEA=EST /TIER=ConsEnd /STK=1 /UG=Gra.433 /UG_TITLE=Transcribed locus, weakly similar to NP_922170.1 putative glycine-rich protein (Oryza sativa (japonica cultivar-group)) /REP_ORG=G. raimondii
GhiAffx.40637.2.A1_at	DT463503	Ghi.11831	2.95211	0	gb:DT463503 /DB_XREF=gi:73860764 /DB_XREF=GH_CHX13K11.r /CLONE=GH_CHX13K11 /TID=GhiAffx.40637.2 /CNT=6 /FEA=EST /TIER=ConsEnd /STK=1 /NOTE=sequence(s) not in UniGene /REP_ORG=G. hirsutum
Ghi.157.2.A1_at	DT458851	Ghi.157	2.95199	0	gb:DT458851 /DB_XREF=gi:73849831 /DB_XREF=GH_ON36M07.f /CLONE=GH_ON36M07 /TID=Ghi.157.2 /CNT=2 /FEA=EST /TIER=ConsEnd /STK=0 /UG=Ghi.157 /UG_TITLE=Transcribed locus /REP_ORG=G. hirsutum
GhiAffx.24723.1.S1_at	DW236029.1	Ghi.15523	2.95188	0	gb:DW236029.1 dbest_id:34840195 /TID=GhiAffx.24723.1 /CNT=6 /FEA=EST /TIER=ConsEnd /STK=2 /NOTE=sequence(s) not in UniGene /REP_ORG=
Ghi.7863.1.A1_s_at	AI725494	Ghi.7863	2.95153	0	gb:AI725494 /DB_XREF=gi:5044277 /DB_XREF=BNLGHi11856 /TID=Ghi.7863.1 /CNT=1 /FEA=EST /TIER=ConsEnd /STK=0 /UG=Ghi.7863 /UG_TITLE=Transcribed locus, moderately similar to NP_568220.1 RNA binding nucleic acid binding (Arabidopsis thaliana) /REP_ORG=G. hirsutum
GraAffx.6067.1.S1_s_at	CO124199	---	2.95142	0	gb:CO124199 /DB_XREF=gi:48822886 /DB_XREF=GR__Eb06P09.f /CLONE=GR__Eb06P09 /TID=GraAffx.6067.1 /CNT=2 /FEA=EST /TIER=ConsEnd /STK=0 /NOTE=sequence(s) not in UniGene /REP_ORG=G. raimondii
GraAffx.22770.1.A1_at	CO088156	---	2.94948	0	gb:CO088156 /DB_XREF=gi:48778790 /DB_XREF=GR__Ea06P10.r /CLONE=GR__Ea06P10 /TID=GraAffx.22770.1 /CNT=2 /FEA=EST /TIER=ConsEnd /STK=2 /NOTE=sequence(s) not in UniGene /REP_ORG=G. raimondii
GhiAffx.26041.1.S1_at	DW501683.1	Ghi.14352	2.94742	0	gb:DW501683.1 dbest_id:35106111 /TID=GhiAffx.26041.1 /CNT=4 /FEA=EST /TIER=ConsEnd /STK=1 /NOTE=sequence(s) not in UniGene /REP_ORG=
GraAffx.33830.2.A1_s_at	CO094170	---	2.94736	0	gb:CO094170 /DB_XREF=gi:48792856 /DB_XREF=GR__Ea16C01.r /CLONE=GR__Ea16C01 /TID=GraAffx.33830.2 /CNT=2 /FEA=EST /TIER=ConsEnd /STK=1 /NOTE=sequence(s) not in UniGene /REP_ORG=G. raimondii
Ghi.2020.1.S1_at	CA993560	Ghi.2020	2.9467	0	gb:CA993560 /DB_XREF=gi:31073281 /DB_XREF=pAR08F10 /TID=Ghi.2020.1 /CNT=10 /FEA=EST /TIER=ConsEnd /STK=0 /UG=Ghi.2020 /UG_TITLE=Transcribed locus, moderately similar to NP_191674.1 DNA binding transcription factor (Arabidopsis thaliana) /REP_ORG=G. hirsutum
Gra.47.3.S1_x_at	CO098885	Gra.47	2.94395	0.0480414	gb:CO098885 /DB_XREF=gi:48797571 /DB_XREF=GR__Ea23H06.f /CLONE=GR__Ea23H06 /TID=Gra.47.3 /CNT=4 /FEA=EST /TIER=ConsEnd /STK=0 /UG=Gra.47 /UG_TITLE=Transcribed locus, moderately similar to NP_198006.1 hexose transporter, putative (Arabidopsis thaliana) /REP_ORG=G. raimondii
Ghi.4579.1.A1_at	DT052145	Ghi.4579	2.94382	0	gb:DT052145 /DB_XREF=gi:72279662 /DB_XREF=COT_EU_E03 /TID=Ghi.4579.1 /CNT=2 /FEA=EST /TIER=ConsEnd /STK=2 /UG=Ghi.4579 /UG_TITLE=Transcribed locus /REP_ORG=G. hirsutum
Gra.139.1.A1_s_at	CO116964	Gra.139	2.94372	0	gb:CO116964 /DB_XREF=gi:48815651 /DB_XREF=GR__Eb019I02.r /CLONE=GR__Eb019I02 /TID=Gra.139.1 /CNT=3 /FEA=EST /TIER=ConsEnd /STK=2 /UG=Gra.139 /UG_TITLE=Transcribed locus, moderately similar to NP_851177.1 myb family transcription factor (Arabidopsis thaliana) /REP_ORG=G. raimondii
GhiAffx.9821.1.A1_at	DT463491	---	2.94358	0	gb:DT463491 /DB_XREF=gi:73860752 /DB_XREF=GH_CHX13K05.r /CLONE=GH_CHX13K05 /TID=GhiAffx.9821.1 /CNT=2 /FEA=EST /TIER=ConsEnd /STK=1 /NOTE=sequence(s) not in UniGene /REP_ORG=G. hirsutum
GhiAffx.16775.1.A1_at	DW227220.1	Ghi.11000	2.94225	0	gb:DW227220.1 dbest_id:34831392 /TID=GhiAffx.16775.1 /CNT=3 /FEA=EST /TIER=ConsEnd /STK=2 /NOTE=sequence(s) not in UniGene /REP_ORG=
Ghi.10593.3.A1_s_at	DT464935	Ghi.10593	2.94158	0	gb:DT464935 /DB_XREF=gi:73862196 /DB_XREF=GH_CHX16I07.f /CLONE=GH_CHX16I07 /TID=Ghi.10593.3 /CNT=4 /FEA=EST /TIER=ConsEnd /STK=0 /UG=Ghi.10593 /UG_TITLE=Transcribed locus, moderately similar to NP_001030877.1 AGK2 (Arabidopsis thaliana) /REP_ORG=G. hirsutum
Ghi.3722.1.A1_s_at	DT462292	Ghi.3722	2.94027	0	gb:DT462292 /DB_XREF=gi:73859553 /DB_XREF=GH_CHX11A06.x /CLONE=GH_CHX11A06 /TID=Ghi.3722.1 /CNT=1 /FEA=EST /TIER=ConsEnd /STK=0 /UG=Ghi.3722 /UG_TITLE=Transcribed locus, weakly similar to NP_189238.2 RGS1 (REGULATOR OF G-PROTEIN SIGNALING 1); signal transducer (Arabidopsis thaliana) /REP_ORG=G. hirsutum
Ghi.1094.1.S1_s_at	DT046455	Ghi.17502	2.93915	0	gb:DT046455 /DB_XREF=gi:72267814 /DB_XREF=COT_AB_A11 /TID=Ghi.1094.1 /CNT=7 /FEA=EST /TIER=ConsEnd /STK=2 /UG=Ghi.1094 /UG_TITLE=Transcribed locus, moderately similar to NP_188300.1 structural constituent of ribosome (Arabidopsis thaliana) /REP_ORG=G. hirsutum
GhiAffx.5978.1.A1_at	DW237937.1	---	2.93898	0	gb:DW237937.1 dbest_id:34842103 /TID=GhiAffx.5978.1 /CNT=2 /FEA=EST /TIER=ConsEnd /STK=1 /NOTE=sequence(s) not in UniGene /REP_ORG=
GraAffx.14152.1.S1_s_at	CO128563	Gra.3556	2.93858	0.0366566	gb:CO128563 /DB_XREF=gi:48830173 /DB_XREF=GR__Eb25H06.r /CLONE=GR__Eb25H06 /TID=GraAffx.14152.1 /CNT=4 /FEA=EST /TIER=ConsEnd /STK=1 /NOTE=sequence(s) not in UniGene /REP_ORG=G. raimondii
Ghi.9029.1.A1_at	DT460460	Ghi.9029	2.93829	0	gb:DT460460 /DB_XREF=gi:73851440 /DB_XREF=GH_ON39F10.r /CLONE=GH_ON39F10 /TID=Ghi.9029.1 /CNT=2 /FEA=EST /TIER=ConsEnd /STK=1 /UG=Ghi.9029 /UG_TITLE=Transcribed locus /REP_ORG=G. hirsutum
Ghi.3758.1.A1_at	DT461980	Ghi.3758	2.93799	0	gb:DT461980 /DB_XREF=gi:73859241 /DB_XREF=GH_CHX07B07.x /CLONE=GH_CHX07B07 /TID=Ghi.3758.1 /CNT=1 /FEA=EST /TIER=ConsEnd /STK=0 /UG=Ghi.3758 /UG_TITLE=Transcribed locus /REP_ORG=G. hirsutum
Gra.998.2.S1_s_at	CO089323	Gra.998	2.93589	0	gb:CO089323 /DB_XREF=gi:48779957 /DB_XREF=GR__Ea08M03.f /CLONE=GR__Ea08M03 /TID=Gra.998.2 /CNT=2 /FEA=EST /TIER=ConsEnd /STK=0 /UG=Gra.998 /UG_TITLE=Transcribed locus, weakly similar to NP_565660.1 expressed protein (Arabidopsis thaliana) /REP_ORG=G. raimondii
Ghi.9078.1.A1_at	DT461277	Ghi.9078	2.93501	0	gb:DT461277 /DB_XREF=gi:73852257 /DB_XREF=GH_ON40K14.r /CLONE=GH_ON40K14 /TID=Ghi.9078.1 /CNT=3 /FEA=EST /TIER=ConsEnd /STK=2 /UG=Ghi.9078 /UG_TITLE=Transcribed locus, weakly similar to NP_922593.1 putative zinc finger protein (Oryza sativa (japonica cultivar-group)) /REP_ORG=G. hirsutum
Ghi.3323.1.A1_at	DT467310	Ghi.9764	2.93461	0.114153	gb:DT467310 /DB_XREF=gi:73864571 /DB_XREF=GH_CHX20D11.r /CLONE=GH_CHX20D11 /TID=Ghi.3323.1 /CNT=1 /FEA=EST /TIER=ConsEnd /STK=1 /UG=Ghi.3323 /UG_TITLE=Transcribed locus, moderately similar to NP_186761.1 MTO1 (METHIONINE OVERACCUMULATION 1) (Arabidopsis thaliana) /REP_ORG=G. hirsutum
Ghi.84.1.S1_at	DR463047	Ghi.84	2.93457	0	gb:DR463047 /DB_XREF=gi:84174399 /DB_XREF=CM114C09 /TID=Ghi.84.1 /CNT=1 /FEA=EST /TIER=ConsEnd /STK=0 /UG=Ghi.84 /UG_TITLE=Transcribed locus /REP_ORG=G. hirsutum
GhiAffx.23732.1.A1_at	DW507522.1	Ghi.15725	2.93441	0	gb:DW507522.1 dbest_id:35113305 /TID=GhiAffx.23732.1 /CNT=3 /FEA=EST /TIER=ConsEnd /STK=1 /NOTE=sequence(s) not in UniGene /REP_ORG=
GhiAffx.13089.1.S1_s_at	DW513763.1	Ghi.7208	2.93301	0	gb:DW513763.1 dbest_id:35119546 /TID=GhiAffx.13089.1 /CNT=2 /FEA=EST /TIER=ConsEnd /STK=1 /NOTE=sequence(s) not in UniGene /REP_ORG=
GhiAffx.63986.1.S1_at	DW514188.1	Ghi.10069	2.93278	0.00854976	gb:DW514188.1 dbest_id:35119971 /TID=GhiAffx.63986.1 /CNT=5 /FEA=EST /TIER=ConsEnd /STK=1 /NOTE=sequence(s) not in UniGene /REP_ORG=
Ghi.10061.1.S1_s_at	DT049928	---	2.93262	0	gb:DT049928 /DB_XREF=gi:72274996 /DB_XREF=COT_DS_H11 /TID=Ghi.10061.1 /CNT=29 /FEA=EST /TIER=ConsEnd /STK=1 /UG=Ghi.10061 /UG_TITLE=Transcribed locus, weakly similar to NP_178199.1 WRKY40; transcription factor (Arabidopsis thaliana) /REP_ORG=G. hirsutum
Ghi.6814.1.A1_at	CA993042	Ghi.6814	2.93212	0	gb:CA993042 /DB_XREF=gi:31072763 /DB_XREF=pAR0494 /TID=Ghi.6814.1 /CNT=2 /FEA=EST /TIER=ConsEnd /STK=0 /UG=Ghi.6814 /UG_TITLE=Transcribed locus, moderately similar to XP_479734.1 putative arm repeat-containing protein (Oryza sativa (japonica cultivar-group)) /REP_ORG=G. hirsutum
GhiAffx.8448.1.A1_at	DW243304.1	Ghi.16235	2.93104	0	gb:DW243304.1 dbest_id:34847470 /TID=GhiAffx.8448.1 /CNT=4 /FEA=EST /TIER=ConsEnd /STK=2 /NOTE=sequence(s) not in UniGene /REP_ORG=
Ghi.3651.2.S1_s_at	DT457253	Ghi.3651	2.93075	0	gb:DT457253 /DB_XREF=gi:73848233 /DB_XREF=GH_ON34E10.f /CLONE=GH_ON34E10 /TID=Ghi.3651.2 /CNT=3 /FEA=EST /TIER=ConsEnd /STK=0 /UG=Ghi.3651 /UG_TITLE=Transcribed locus, weakly similar to NP_566998.1 EMB1967 (Arabidopsis thaliana) /REP_ORG=G. hirsutum
GraAffx.26283.1.A1_x_at	CO092657	---	2.92922	0	gb:CO092657 /DB_XREF=gi:48791343 /DB_XREF=GR__Ea13N03.r /CLONE=GR__Ea13N03 /TID=GraAffx.26283.1 /CNT=3 /FEA=EST /TIER=ConsEnd /STK=1 /NOTE=sequence(s) not in UniGene /REP_ORG=G. raimondii
GhiAffx.1082.1.S1_at	DW511203.1	Ghi.12989	2.92835	0.0292223	gb:DW511203.1 dbest_id:35116986 /TID=GhiAffx.1082.1 /CNT=5 /FEA=EST /TIER=ConsEnd /STK=1 /NOTE=sequence(s) not in UniGene /REP_ORG=
Ghi.4099.2.A1_s_at	AJ513168	Ghi.4099	2.92545	0	gb:AJ513168 /DB_XREF=gi:24976650 /DB_XREF=AJ513168 /CLONE=su187b06r3 /TID=Ghi.4099.2 /CNT=5 /FEA=EST /TIER=ConsEnd /STK=0 /UG=Ghi.4099 /UG_TITLE=Transcribed locus, moderately similar to NP_565931.1 unknown protein (Arabidopsis thaliana) /REP_ORG=G. hirsutum
Ghi.3458.1.A1_at	DT465599	Ghi.3458	2.92465	0	gb:DT465599 /DB_XREF=gi:73862860 /DB_XREF=GH_CHX17K06.r /CLONE=GH_CHX17K06 /TID=Ghi.3458.1 /CNT=5 /FEA=EST /TIER=ConsEnd /STK=0 /UG=Ghi.3458 /UG_TITLE=Transcribed locus, moderately similar to NP_567227.1 pectinesterase (Arabidopsis thaliana) /REP_ORG=G. hirsutum
GhiAffx.40179.1.A1_at	DW495951.1	---	2.92216	0.0366566	gb:DW495951.1 dbest_id:35100379 /TID=GhiAffx.40179.1 /CNT=2 /FEA=EST /TIER=ConsEnd /STK=1 /NOTE=sequence(s) not in UniGene /REP_ORG=
Ghi.3390.1.S1_at	DT466542	Ghi.17924	2.92194	0.0238141	gb:DT466542 /DB_XREF=gi:73863803 /DB_XREF=GH_CHX19A10.r /CLONE=GH_CHX19A10 /TID=Ghi.3390.1 /CNT=2 /FEA=EST /TIER=ConsEnd /STK=1 /UG=Ghi.3390 /UG_TITLE=Transcribed locus /REP_ORG=G. hirsutum
Ghi.2303.1.A1_at	DT466391	Ghi.17920	2.9213	0.0366566	gb:DT466391 /DB_XREF=gi:73863652 /DB_XREF=GH_CHX18M24.r /CLONE=GH_CHX18M24 /TID=Ghi.2303.1 /CNT=1 /FEA=EST /TIER=ConsEnd /STK=1 /UG=Ghi.2303 /UG_TITLE=Transcribed locus, weakly similar to NP_172597.1 ATP binding carbohydrate binding kinase protein kinase protein serinethreonine kinase protein-tyrosine kinase sugar binding (Arabidopsis thaliana) /REP_ORG=G. hirsutum
Ghi.4745.1.S1_at	DT461571	Ghi.4745	2.92091	0	gb:DT461571 /DB_XREF=gi:73858832 /DB_XREF=GH_CHX02A01.x /CLONE=GH_CHX02A01 /TID=Ghi.4745.1 /CNT=3 /FEA=EST /TIER=ConsEnd /STK=0 /UG=Ghi.4745 /UG_TITLE=Transcribed locus, weakly similar to NP_193471.1 unknown protein (Arabidopsis thaliana) /REP_ORG=G. hirsutum
Ghi.5591.1.A1_x_at	DT047241	Ghi.5591	2.9197	0	gb:DT047241 /DB_XREF=gi:72269609 /DB_XREF=COT_CL_F12 /TID=Ghi.5591.1 /CNT=1 /FEA=EST /TIER=ConsEnd /STK=1 /UG=Ghi.5591 /UG_TITLE=Transcribed locus, weakly similar to NP_190183.1 ATEXLA1 (ARABIDOPSIS THALIANA EXPANSIN-LIKE A1) (Arabidopsis thaliana) /REP_ORG=G. hirsutum
Ghi.1096.1.A1_at	DT459400	Ghi.1096	2.91968	0	gb:DT459400 /DB_XREF=gi:73850380 /DB_XREF=GH_ON37K01.r /CLONE=GH_ON37K01 /TID=Ghi.1096.1 /CNT=2 /FEA=EST /TIER=ConsEnd /STK=1 /UG=Ghi.1096 /UG_TITLE=Transcribed locus, moderately similar to NP_192203.1 unknown protein (Arabidopsis thaliana) /REP_ORG=G. hirsutum
Ghi.583.1.S1_at	DR457425	Ghi.583	2.9172	0	gb:DR457425 /DB_XREF=gi:84168777 /DB_XREF=CM055B04 /TID=Ghi.583.1 /CNT=1 /FEA=EST /TIER=ConsEnd /STK=0 /UG=Ghi.583 /UG_TITLE=Transcribed locus, moderately similar to NP_566074.1 unknown protein (Arabidopsis thaliana) /REP_ORG=G. hirsutum
Ghi.865.1.A1_at	DR453851	Ghi.865	2.91717	0	gb:DR453851 /DB_XREF=gi:84165203 /DB_XREF=CM017F03 /TID=Ghi.865.1 /CNT=1 /FEA=EST /TIER=ConsEnd /STK=0 /UG=Ghi.865 /UG_TITLE=Transcribed locus /REP_ORG=G. hirsutum
GhiAffx.47898.1.S1_at	DV849224	Ghi.20229	2.91627	0	gb:DV849224 /DB_XREF=gi:82755662 /DB_XREF=GH_LSL08E02.f /CLONE=GH_LSL08E02 /TID=GhiAffx.47898.1 /CNT=2 /FEA=EST /TIER=ConsEnd /STK=0 /NOTE=sequence(s) not in UniGene /REP_ORG=G. hirsutum
Ghi.5506.2.S1_x_at	DT047486	Ghi.5506	2.91553	0	gb:DT047486 /DB_XREF=gi:72270101 /DB_XREF=COT_CO_F02 /TID=Ghi.5506.2 /CNT=1 /FEA=EST /TIER=ConsEnd /STK=0 /UG=Ghi.5506 /UG_TITLE=Transcribed locus, weakly similar to NP_568521.1 unknown protein (Arabidopsis thaliana) /REP_ORG=G. hirsutum
GhiAffx.32111.1.A1_at	DT048333	Ghi.16479	2.91517	0.00854976	gb:DT048333 /DB_XREF=gi:72271786 /DB_XREF=COT_CZ_C12 /TID=GhiAffx.32111.1 /CNT=2 /FEA=EST /TIER=ConsEnd /STK=2 /NOTE=sequence(s) not in UniGene /REP_ORG=G. hirsutum
GraAffx.28786.1.S1_s_at	CO085474	---	2.91482	0	gb:CO085474 /DB_XREF=gi:48776108 /DB_XREF=GR__Ea02K13.r /CLONE=GR__Ea02K13 /TID=GraAffx.28786.1 /CNT=2 /FEA=EST /TIER=ConsEnd /STK=1 /NOTE=sequence(s) not in UniGene /REP_ORG=G. raimondii
Ghi.640.1.S1_at	DR456599	Ghi.640	2.9145	0	gb:DR456599 /DB_XREF=gi:84167951 /DB_XREF=CM046E01 /TID=Ghi.640.1 /CNT=1 /FEA=EST /TIER=ConsEnd /STK=0 /UG=Ghi.640 /UG_TITLE=Transcribed locus, weakly similar to NP_193599.2 ATP binding protein kinase protein serinethreonine kinase protein-tyrosine kinase (Arabidopsis thaliana) /REP_ORG=G. hirsutum
Ghi.4290.1.S1_at	DT455739	Ghi.4290	2.91158	0	gb:DT455739 /DB_XREF=gi:73846719 /DB_XREF=GH_ON02H08.f /CLONE=GH_ON02H08 /TID=Ghi.4290.1 /CNT=2 /FEA=EST /TIER=ConsEnd /STK=2 /UG=Ghi.4290 /UG_TITLE=Transcribed locus /REP_ORG=G. hirsutum
GhiAffx.24524.1.S1_at	DT048081	Ghi.13850	2.91056	0	gb:DT048081 /DB_XREF=gi:72271286 /DB_XREF=COT_CW_B06 /TID=GhiAffx.24524.1 /CNT=4 /FEA=EST /TIER=ConsEnd /STK=1 /NOTE=sequence(s) not in UniGene /REP_ORG=G. hirsutum
GhiAffx.42137.1.S1_at	DW506588.1	Ghi.19455	2.90957	0	gb:DW506588.1 dbest_id:35112371 /TID=GhiAffx.42137.1 /CNT=2 /FEA=EST /TIER=ConsEnd /STK=0 /NOTE=sequence(s) not in UniGene /REP_ORG=
Ghi.443.2.S1_at	DT466879	Ghi.4690	2.90745	0	gb:DT466879 /DB_XREF=gi:73864140 /DB_XREF=GH_CHX19I22.f /CLONE=GH_CHX19I22 /TID=Ghi.443.2 /CNT=2 /FEA=EST /TIER=ConsEnd /STK=0 /UG=Ghi.443 /UG_TITLE=Transcribed locus, strongly similar to NP_196254.1 structural constituent of ribosome (Arabidopsis thaliana) /REP_ORG=G. hirsutum
Ghi.7990.2.S1_at	DT048933	Ghi.12182	2.90537	0	gb:DT048933 /DB_XREF=gi:72272998 /DB_XREF=COT_DG_G04 /TID=Ghi.7990.2 /CNT=12 /FEA=EST /TIER=ConsEnd /STK=1 /UG=Ghi.7990 /UG_TITLE=Transcribed locus, moderately similar to NP_197683.1 ubiquitin-protein ligase zinc ion binding (Arabidopsis thaliana) /REP_ORG=G. hirsutum
Gra.685.1.A1_s_at	CO087328	Gra.1533	2.90485	0	gb:CO087328 /DB_XREF=gi:48777962 /DB_XREF=GR__Ea05L22.r /CLONE=GR__Ea05L22 /TID=Gra.685.1 /CNT=2 /FEA=EST /TIER=ConsEnd /STK=1 /UG=Gra.685 /UG_TITLE=Transcribed locus, moderately similar to NP_568534.1 eIF4-gammaeIF5eIF2-epsilon domain-containing protein (Arabidopsis thaliana) /REP_ORG=G. raimondii
Ghi.1392.3.A1_at	DT458652	Ghi.1392	2.90204	0	gb:DT458652 /DB_XREF=gi:73849632 /DB_XREF=GH_ON36H16.r /CLONE=GH_ON36H16 /TID=Ghi.1392.3 /CNT=2 /FEA=EST /TIER=ConsEnd /STK=1 /UG=Ghi.1392 /UG_TITLE=Transcribed locus, moderately similar to NP_187609.2 unknown protein (Arabidopsis thaliana) /REP_ORG=G. hirsutum
Ghi.4227.1.S1_s_at	DT456122	Ghi.4227	2.90063	0.0333442	gb:DT456122 /DB_XREF=gi:73847102 /DB_XREF=GH_ON12A03.f /CLONE=GH_ON12A03 /TID=Ghi.4227.1 /CNT=3 /FEA=EST /TIER=ConsEnd /STK=0 /UG=Ghi.4227 /UG_TITLE=Transcribed locus, moderately similar to NP_567523.1 CT-BMY; beta-amylase (Arabidopsis thaliana) /REP_ORG=G. hirsutum
Ghi.8364.1.A1_at	CA993541	Ghi.8364	2.89927	0	gb:CA993541 /DB_XREF=gi:31073262 /DB_XREF=pAR08D10 /TID=Ghi.8364.1 /CNT=16 /FEA=EST /TIER=ConsEnd /STK=0 /UG=Ghi.8364 /UG_TITLE=Transcribed locus, weakly similar to NP_567231.1 SAG21 (SENESCENCE-ASSOCIATED GENE 21) (Arabidopsis thaliana) /REP_ORG=G. hirsutum
Ghi.3331.1.S1_s_at	DT467205	Ghi.3331	2.8992	0	gb:DT467205 /DB_XREF=gi:73864466 /DB_XREF=GH_CHX20A17.r /CLONE=GH_CHX20A17 /TID=Ghi.3331.1 /CNT=2 /FEA=EST /TIER=ConsEnd /STK=0 /UG=Ghi.3331 /UG_TITLE=Transcribed locus, moderately similar to NP_195253.3 transcription factor (Arabidopsis thaliana) /REP_ORG=G. hirsutum
Ghi.10569.1.S1_s_at	DR463352	Ghi.10569	2.89909	0	gb:DR463352 /DB_XREF=gi:84174704 /DB_XREF=CM117E06 /TID=Ghi.10569.1 /CNT=8 /FEA=EST /TIER=ConsEnd /STK=0 /UG=Ghi.10569 /UG_TITLE=Transcribed locus, moderately similar to NP_194129.1 ARF9 (AUXIN RESPONSE FACTOR 9); transcription factor (Arabidopsis thaliana) /REP_ORG=G. hirsutum
GraAffx.33499.1.S1_at	CO099830	---	2.8982	0	gb:CO099830 /DB_XREF=gi:48798516 /DB_XREF=GR__Ea24O24.r /CLONE=GR__Ea24O24 /TID=GraAffx.33499.1 /CNT=4 /FEA=EST /TIER=ConsEnd /STK=1 /NOTE=sequence(s) not in UniGene /REP_ORG=G. raimondii
GhiAffx.59727.1.A1_at	DT458505	Ghi.13717	2.89778	0	gb:DT458505 /DB_XREF=gi:73849485 /DB_XREF=GH_ON36E02.r /CLONE=GH_ON36E02 /TID=GhiAffx.59727.1 /CNT=5 /FEA=EST /TIER=ConsEnd /STK=0 /NOTE=sequence(s) not in UniGene /REP_ORG=G. hirsutum
GhiAffx.1589.23.S1_at	DN801074	Ghi.11615	2.89684	0	gb:DN801074 /DB_XREF=gi:84151719 /DB_XREF=G.hir-15-20 DAA bolls drought stressed 229 /TID=GhiAffx.1589.23 /CNT=5 /FEA=EST /TIER=ConsEnd /STK=0 /NOTE=sequence(s) not in UniGene /REP_ORG=G. hirsutum
Ghi.8754.1.A1_at	DT053006	Ghi.8754	2.89647	0	gb:DT053006 /DB_XREF=gi:72281497 /DB_XREF=COT_FJ_H02 /TID=Ghi.8754.1 /CNT=3 /FEA=EST /TIER=ConsEnd /STK=3 /UG=Ghi.8754 /UG_TITLE=Transcribed locus /REP_ORG=G. hirsutum
Ghi.4185.1.S1_at	DT456344	Ghi.4185	2.89512	0	gb:DT456344 /DB_XREF=gi:73847324 /DB_XREF=GH_ON14F12.f /CLONE=GH_ON14F12 /TID=Ghi.4185.1 /CNT=3 /FEA=EST /TIER=ConsEnd /STK=0 /UG=Ghi.4185 /UG_TITLE=Transcribed locus /REP_ORG=G. hirsutum
Gra.568.1.A1_s_at	CO124462	Gra.568	2.89511	0	gb:CO124462 /DB_XREF=gi:48823149 /DB_XREF=GR__Eb07G12.r /CLONE=GR__Eb07G12 /TID=Gra.568.1 /CNT=1 /FEA=EST /TIER=ConsEnd /STK=1 /UG=Gra.568 /UG_TITLE=Transcribed locus, weakly similar to NP_171917.1 leucine-rich repeat family protein protein kinase family protein (Arabidopsis thaliana) /REP_ORG=G. raimondii
Ghi.3642.2.A1_at	DT463326	Ghi.3642	2.89341	0.0238141	gb:DT463326 /DB_XREF=gi:73860587 /DB_XREF=GH_CHX13G08.r /CLONE=GH_CHX13G08 /TID=Ghi.3642.2 /CNT=2 /FEA=EST /TIER=ConsEnd /STK=1 /UG=Ghi.3642 /UG_TITLE=Transcribed locus /REP_ORG=G. hirsutum
Ghi.9462.1.S1_at	DN780462	Ghi.9462	2.89289	0.0480414	gb:DN780462 /DB_XREF=gi:84149162 /DB_XREF=G.hir-Cotyledon 990 /TID=Ghi.9462.1 /CNT=1 /FEA=EST /TIER=ConsEnd /STK=0 /UG=Ghi.9462 /UG_TITLE=Transcribed locus /REP_ORG=G. hirsutum
Ghi.10617.1.S1_at	DT049325	Ghi.10617	2.89245	0	gb:DT049325 /DB_XREF=gi:72273777 /DB_XREF=COT_DL_D12 /TID=Ghi.10617.1 /CNT=9 /FEA=EST /TIER=ConsEnd /STK=1 /UG=Ghi.10617 /UG_TITLE=Transcribed locus, weakly similar to NP_201548.1 actin binding (Arabidopsis thaliana) /REP_ORG=G. hirsutum
Ghi.10639.1.S1_s_at	DT051576	Ghi.10639	2.8902	0	gb:DT051576 /DB_XREF=gi:72278526 /DB_XREF=COT_EN_G02 /TID=Ghi.10639.1 /CNT=47 /FEA=EST /TIER=Stack /STK=10 /UG=Ghi.10639 /UG_TITLE=Transcribed locus, weakly similar to NP_850947.1 ERD10 (Arabidopsis thaliana) /REP_ORG=G. hirsutum
Ghi.5810.1.S1_at	CO490819	Ghi.5810	2.88922	0	gb:CO490819 /DB_XREF=gi:54115310 /DB_XREF=G.h.fbr-sw00209 /TID=Ghi.5810.1 /CNT=3 /FEA=EST /TIER=ConsEnd /STK=0 /UG=Ghi.5810 /UG_TITLE=Transcribed locus, moderately similar to NP_568900.1 unknown protein (Arabidopsis thaliana) /REP_ORG=G. hirsutum
GhiAffx.45085.1.S1_at	DW502524.1	Ghi.15621	2.88711	0	gb:DW502524.1 dbest_id:35106952 /TID=GhiAffx.45085.1 /CNT=3 /FEA=EST /TIER=ConsEnd /STK=1 /NOTE=sequence(s) not in UniGene /REP_ORG=
GhiAffx.6397.1.A1_at	DW500039.1	---	2.88675	0	gb:DW500039.1 dbest_id:35104467 /TID=GhiAffx.6397.1 /CNT=2 /FEA=EST /TIER=ConsEnd /STK=1 /NOTE=sequence(s) not in UniGene /REP_ORG=
Ghi.256.1.S1_at	DR461410	Ghi.256	2.88663	0	gb:DR461410 /DB_XREF=gi:84172762 /DB_XREF=CM097B01 /TID=Ghi.256.1 /CNT=1 /FEA=EST /TIER=ConsEnd /STK=0 /UG=Ghi.256 /UG_TITLE=Transcribed locus /REP_ORG=G. hirsutum
GhiAffx.44812.1.A1_at	DW520469.1	Ghi.16108	2.88584	0	gb:DW520469.1 dbest_id:35126252 /TID=GhiAffx.44812.1 /CNT=3 /FEA=EST /TIER=ConsEnd /STK=1 /NOTE=sequence(s) not in UniGene /REP_ORG=
Ghi.7224.1.S1_at	AI727337	Ghi.7224	2.88575	0	gb:AI727337 /DB_XREF=gi:5046189 /DB_XREF=BNLGHi7770 /TID=Ghi.7224.1 /CNT=3 /FEA=EST /TIER=ConsEnd /STK=0 /UG=Ghi.7224 /UG_TITLE=Transcribed locus, weakly similar to NP_188488.1 single-stranded DNA binding (Arabidopsis thaliana) /REP_ORG=G. hirsutum
Ghi.6438.1.S1_at	DN827098	Ghi.16905	2.88546	0.0480414	gb:DN827098 /DB_XREF=gi:84158051 /DB_XREF=G.hir-20, 30 hrs post inoculation 408 /TID=Ghi.6438.1 /CNT=80 /FEA=EST /TIER=Stack /STK=24 /UG=Ghi.6438 /UG_TITLE=Transcribed locus, moderately similar to XP_477539.1 putative class III acidic chitinase (Oryza sativa (japonica cultivar-group)) /REP_ORG=G. hirsutum
GraAffx.28886.1.S1_x_at	CO085213	---	2.88191	0	gb:CO085213 /DB_XREF=gi:48775847 /DB_XREF=GR__Ea02D22.r /CLONE=GR__Ea02D22 /TID=GraAffx.28886.1 /CNT=2 /FEA=EST /TIER=ConsEnd /STK=1 /NOTE=sequence(s) not in UniGene /REP_ORG=G. raimondii
GraAffx.20158.1.A1_s_at	CO084875	---	2.88123	0	gb:CO084875 /DB_XREF=gi:48775509 /DB_XREF=GR__Ea01L12.f /CLONE=GR__Ea01L12 /TID=GraAffx.20158.1 /CNT=4 /FEA=EST /TIER=ConsEnd /STK=0 /NOTE=sequence(s) not in UniGene /REP_ORG=G. raimondii
GhiAffx.13508.1.A1_at	DT054133	Ghi.16510	2.88041	0	gb:DT054133 /DB_XREF=gi:72283730 /DB_XREF=COT_FZ_C03 /TID=GhiAffx.13508.1 /CNT=3 /FEA=EST /TIER=ConsEnd /STK=2 /NOTE=sequence(s) not in UniGene /REP_ORG=G. hirsutum
GhiAffx.58723.1.A1_s_at	DW495754.1	Ghi.1763	2.88009	0	gb:DW495754.1 dbest_id:35100182 /TID=GhiAffx.58723.1 /CNT=1 /FEA=EST /TIER=ConsEnd /STK=1 /NOTE=sequence(s) not in UniGene /REP_ORG=
Gra.1115.1.S1_at	CO121713	Gra.1115	2.87997	0	gb:CO121713 /DB_XREF=gi:48820400 /DB_XREF=GR__Eb03A10.f /CLONE=GR__Eb03A10 /TID=Gra.1115.1 /CNT=5 /FEA=EST /TIER=ConsEnd /STK=0 /UG=Gra.1115 /UG_TITLE=Transcribed locus, strongly similar to XP_545420.1 PREDICTED: similar to HIST1H3I protein (Canis familiaris) /REP_ORG=G. raimondii
GhiAffx.6695.1.S1_at	DW503325.1	---	2.87989	0.0480414	gb:DW503325.1 dbest_id:35107753 /TID=GhiAffx.6695.1 /CNT=2 /FEA=EST /TIER=ConsEnd /STK=1 /NOTE=sequence(s) not in UniGene /REP_ORG=
Ghi.3833.1.A1_s_at	DT458148	Ghi.1194	2.87951	0	gb:DT458148 /DB_XREF=gi:73849128 /DB_XREF=GH_ON35K21.r /CLONE=GH_ON35K21 /TID=Ghi.3833.1 /CNT=2 /FEA=EST /TIER=ConsEnd /STK=1 /UG=Ghi.3833 /UG_TITLE=Transcribed locus, weakly similar to NP_851101.1 binding (Arabidopsis thaliana) /REP_ORG=G. hirsutum
Ghi.7034.1.S1_at	DT460547	Ghi.7034	2.87951	0	gb:DT460547 /DB_XREF=gi:73851527 /DB_XREF=GH_ON39H15.r /CLONE=GH_ON39H15 /TID=Ghi.7034.1 /CNT=3 /FEA=EST /TIER=ConsEnd /STK=1 /UG=Ghi.7034 /UG_TITLE=Transcribed locus, weakly similar to NP_565049.1 HAP2C; transcription factor (Arabidopsis thaliana) /REP_ORG=G. hirsutum
Ghi.6154.2.S1_at	AJ513825	Ghi.6154	2.87924	0	gb:AJ513825 /DB_XREF=gi:24977308 /DB_XREF=AJ513825 /CLONE=suo49d10r3 /TID=Ghi.6154.2 /CNT=1 /FEA=EST /TIER=ConsEnd /STK=0 /UG=Ghi.6154 /UG_TITLE=Transcribed locus /REP_ORG=G. hirsutum
Ghi.948.1.S1_at	DR452903	Ghi.948	2.87794	0	gb:DR452903 /DB_XREF=gi:84164255 /DB_XREF=CM007E12 /TID=Ghi.948.1 /CNT=1 /FEA=EST /TIER=ConsEnd /STK=1 /UG=Ghi.948 /UG_TITLE=Transcribed locus /REP_ORG=G. hirsutum
Ghi.1349.4.S1_s_at	DN781599	Ghi.1349	2.87578	0	gb:DN781599 /DB_XREF=gi:84150299 /DB_XREF=G.hir-Cotyledon 2127 /TID=Ghi.1349.4 /CNT=1 /FEA=EST /TIER=ConsEnd /STK=0 /UG=Ghi.1349 /UG_TITLE=Transcribed locus, moderately similar to NP_849549.1 LSD1 (LESION SIMULATING DISEASE) (Arabidopsis thaliana) /REP_ORG=G. hirsutum
Gra.2073.1.S1_at	CO069590	Gra.2073	2.87509	0	gb:CO069590 /DB_XREF=gi:48739071 /DB_XREF=GR__Ea26D23.r /CLONE=GR__Ea26D23 /TID=Gra.2073.1 /CNT=3 /FEA=EST /TIER=ConsEnd /STK=1 /UG=Gra.2073 /UG_TITLE=Transcribed locus, weakly similar to NP_564820.1 D111G-patch domain-containing protein (Arabidopsis thaliana) /REP_ORG=G. raimondii
[truncated: 4,148 more rows]

## Sheet: ABA annotation
Supplemental Table S1-2 A list of annotation of up-regulated genes in cotton seedlings under ABA treatment (fold change≥2, q-value≤0.05)
[truncated: 493 more rows]

[truncated: 8 more sheets: cold, cold annotation, Mannitol, Mannitol annotation, NaCl, NaCL annotation, pH, pH annotation]
