# Supplementary material for: Transcriptome Analysis Reveals Crosstalk of Responsive Genes to Multiple Abiotic Stresses in Cotton (Gossypium hirsutum L.)
Source: PLoS One. 2013 Nov 5;8(11):e80218. doi: 10.1371/journal.pone.0080218 (PMC3818253; doi:10.1371/journal.pone.0080218)
Supplement: Tables S4 — Commonly changed transcripts under different treatment. (XLSX) [file pone.0080218.s004.xlsx]

## Sheet: common changed trancripts
Supplementary Table S3 A list of common changed transcripts in cotton seedlings under various abiotic stress treatment (q-value≤0.05)
Probe Set ID	Gene Bank ID	UniGene ID	Fold Change	q-value(%)	Fold Change	q-value(%)	Fold Change	q-value(%)	Fold Change	q-value(%)	Fold Change	q-value(%)	Target Description	Description	Protein ID	Homologous Protein description	Source	Protein aa length
			NaCl		Mannitol		pH		Cold		ABA
Ghi.10692.1.S1_s_at	DV850121	Ghi.10692	20.094	4.15601	109.891	0	136.847	0	75.6177	0	50.671	0	gb:DV850121 /DB_XREF=gi:82756559 /DB_XREF=GH_LSL28C08.f /CLONE=GH_LSL28C08 /TID=Ghi.10692.1 /CNT=2 /FEA=EST /TIER=ConsEnd /STK=0 /UG=Ghi.10692 /UG_TITLE=Transcribed locus, weakly similar to NP_189308.1 unknown protein (Arabidopsis thaliana) /REP_ORG=G. hirsutum	weakly similar to NP_189308.1 unknown protein (Arabidopsis thaliana	NP_189308.1	alpha-glucan phosphorylase isozyme H	Arabidopsis thaliana	841
Ghi.1441.1.S1_s_at	DR456691	Ghi.1441	5.72736	1.89298	9.59156	0	7.84247	0	5.46571	0	22.1855	0	gb:DR456691 /DB_XREF=gi:84168043 /DB_XREF=CM047D10 /TID=Ghi.1441.1 /CNT=3 /FEA=EST /TIER=ConsEnd /STK=0 /UG=Ghi.1441 /UG_TITLE=Transcribed locus, moderately similar to NP_563877.1 SEX1 (STARCH EXCESS 1) (Arabidopsis thaliana) /REP_ORG=G. hirsutum	moderately similar to NP_563877.1 SEX1 (STARCH EXCESS 1) (Arabidopsis thaliana	NP_563877.1	alpha-glucan water dikinase 1	Arabidopsis thaliana	1399
Gra.1742.1.A1_s_at	CO121872	Gra.2119	5.06332	3.91728	8.1439	0	5.89121	0	6.1881	0	18.1441	0	gb:CO121872 /DB_XREF=gi:48820559 /DB_XREF=GR__Eb03D24.r /CLONE=GR__Eb03D24 /TID=Gra.1742.1 /CNT=3 /FEA=EST /TIER=ConsEnd /STK=1 /UG=Gra.1742 /UG_TITLE=Transcribed locus, weakly similar to NP_563877.1 starch excess protein (SEX1) (Arabidopsis thaliana) /REP_ORG=G. raimondii	weakly similar to NP_563877.1 starch excess protein (SEX1) (Arabidopsis thaliana	NP_563877.1	alpha-glucan water dikinase 1	Arabidopsis thaliana	1399
Ghi.5148.1.S1_x_at	DT048872	Ghi.5148	5.86477	0.372472	11.127	0	8.20016	0	6.24781	0	12.6772	0	gb:DT048872 /DB_XREF=gi:72272878 /DB_XREF=COT_DG_A06 /TID=Ghi.5148.1 /CNT=5 /FEA=EST /TIER=ConsEnd /STK=0 /UG=Ghi.5148 /UG_TITLE=Transcribed locus, strongly similar to NP_190281.1 ATPHS2; phosphorylase transferase, transferring glycosyl groups (Arabidopsis thaliana) /REP_ORG=G. hirsutum	strongly similar to NP_190281.1 ATPHS2; phosphorylase transferase	NP_190281.1	ATPHS2; phosphorylase transferase	Arabidopsis thaliana
Gra.108.2.A1_x_at	CO123963	Gra.108	2.30265	3.51349	5.83133	0	7.54548	0	4.78157	0	4.53838	0	gb:CO123963 /DB_XREF=gi:48822650 /DB_XREF=GR__Eb06I10.r /CLONE=GR__Eb06I10 /TID=Gra.108.2 /CNT=2 /FEA=EST /TIER=ConsEnd /STK=0 /UG=Gra.108 /UG_TITLE=Transcribed locus, weakly similar to NP_177671.1 wound-responsive protein-related (Arabidopsis thaliana) /REP_ORG=G. raimondii	weakly similar to NP_177671.1 wound-responsive protein-related (Arabidopsis thaliana	NP_177671.1	bifunctional nuclease in basal defense response 1	Arabidopsis thaliana	325
Gra.108.2.S1_s_at	CO096459	Gra.108	2.1575	2.34402	4.37388	0	6.55756	0	4.94682	0	4.37654	0	gb:CO096459 /DB_XREF=gi:48795145 /DB_XREF=GR__Ea19L17.f /CLONE=GR__Ea19L17 /TID=Gra.108.2 /CNT=2 /FEA=EST /TIER=ConsEnd /STK=0 /UG=Gra.108 /UG_TITLE=Transcribed locus, weakly similar to NP_177671.1 wound-responsive protein-related (Arabidopsis thaliana) /REP_ORG=G. raimondii	weakly similar to NP_177671.1 wound-responsive protein-related (Arabidopsis thaliana	NP_177671.1	bifunctional nuclease in basal defense response 1	Arabidopsis thaliana	325
Gra.63.1.A1_s_at	CO071723	Gra.63	3.42921	0.943794	4.42667	0	7.84085	0	7.34629	0	2.37043	0.0366566	gb:CO071723 /DB_XREF=gi:48741204 /DB_XREF=GR__Ea30E11.r /CLONE=GR__Ea30E11 /TID=Gra.63.1 /CNT=1 /FEA=EST /TIER=ConsEnd /STK=1 /UG=Gra.63 /UG_TITLE=Transcribed locus, moderately similar to NP_188246.1 ferredoxin-related (Arabidopsis thaliana) /REP_ORG=G. raimondii	moderately similar to NP_188246.1 ferredoxin-related (Arabidopsis thaliana	NP_188246.1	CCR-like protein	Arabidopsis thaliana	141
Ghi.7728.1.S1_at	AI727487	Ghi.7728	3.20973	1.26952	6.71689	0	8.60097	0	2.3053	0.0648547	4.73316	0	gb:AI727487 /DB_XREF=gi:5046339 /DB_XREF=BNLGHi8280 /TID=Ghi.7728.1 /CNT=3 /FEA=EST /TIER=ConsEnd /STK=0 /UG=Ghi.7728 /UG_TITLE=Transcribed locus, moderately similar to NP_564717.1 heat shock protein binding unfolded protein binding (Arabidopsis thaliana) /REP_ORG=G. hirsutum	moderately similar to NP_564717.1 heat shock protein binding unfolded protein binding (Arabidopsis thaliana	NP_564717.1	chaperone DnaJ-domain containing protein	Arabidopsis thaliana	156
Ghi.1545.1.S1_at	DR463018	Ghi.1545	3.25538	1.50613	2.91821	0	4.72067	0	6.26958	0	2.31947	0.114153	gb:DR463018 /DB_XREF=gi:84174370 /DB_XREF=CM114A04 /TID=Ghi.1545.1 /CNT=2 /FEA=EST /TIER=ConsEnd /STK=0 /UG=Ghi.1545 /UG_TITLE=Transcribed locus, weakly similar to NP_565266.1 unknown protein (Arabidopsis thaliana) /REP_ORG=G. hirsutum	weakly similar to NP_565266.1 unknown protein (Arabidopsis thaliana	NP_565266.1	chlororespiratory reduction 3	Arabidopsis thaliana	174
Ghi.6075.1.S1_s_at	DT048502	Ghi.6075	2.3138	0.372472	2.39671	0	2.48841	0	3.4205	0	2.30481	0.0333442	gb:DT048502 /DB_XREF=gi:72272120 /DB_XREF=COT_DB_C10 /TID=Ghi.6075.1 /CNT=7 /FEA=EST /TIER=ConsEnd /STK=1 /UG=Ghi.6075 /UG_TITLE=Transcribed locus, weakly similar to NP_200711.1 COPT1 (COPPER TRANSPORTER 1); copper ion transporter (Arabidopsis thaliana) /REP_ORG=G. hirsutum	weakly similar to NP_200711.1 COPT1 (COPPER TRANSPORTER 1); copper ion transporter (Arabidopsis thaliana	NP_200711.1	copper transporter 1	Arabidopsis thaliana	170
Ghi.8046.1.S1_at	U53702.1	Ghi.8046	3.96242	0	7.08179	0	3.3933	0	3.04305	0	3.78308	0	gb:U53702.1 /DB_XREF=gi:1297360 /TID=Ghi.8046.1 /CNT=1 /FEA=mRNA /TIER=ConsEnd /STK=0 /UG=Ghi.8046 /UG_TITLE=Gossypium hirsutum alcohol dehydrogenase 1 /DEF=Gossypium hirsutum alcohol dehydrogenase 1 mRNA, partial cds. /REP_ORG=G. hirsutum	Gossypium hirsutum alcohol dehydrogenase 1		Gossypium hirsutum alcohol dehydrogenase 1	Gossypium hirsutum	614
Ghi.1677.1.S1_at	DN760023	Ghi.1677	3.90039	0	4.37603	0	5.29146	0	2.32794	0.453345	4.04981	0	gb:DN760023 /DB_XREF=gi:84145781 /DB_XREF=G.hir-stem 2530 /TID=Ghi.1677.1 /CNT=1 /FEA=EST /TIER=ConsEnd /STK=0 /UG=Ghi.1677 /UG_TITLE=Transcribed locus, weakly similar to NP_188221.2 MFP1 (MAR BINDING FILAMENT-LIKE PROTEIN 1) (Arabidopsis thaliana) /REP_ORG=G. hirsutum	weakly similar to NP_188221.2 MFP1 (MAR BINDING FILAMENT-LIKE PROTEIN 1)(Arabidopsis thaliana	NP_188221.2	MAR-binding filament-like protein 1	Arabidopsis thaliana	726
Ghi.6538.1.S1_at	CD485949	---	2.61374	3.51349	3.37933	0	3.81128	0	6.61502	0	2.64432	0	gb:CD485949 /DB_XREF=gi:31406914 /DB_XREF=CFUS5.1B05 /CLONE=CFUS5.1B05 /TID=Ghi.6538.1 /CNT=4 /FEA=EST /TIER=ConsEnd /STK=0 /UG=Ghi.6538 /UG_TITLE=Transcribed locus, moderately similar to NP_187057.2 ANAC047; transcription factor (Arabidopsis thaliana) /REP_ORG=G. hirsutum	moderately similar to NP_187057.2 ANAC047; transcription factor (Arabidopsis thaliana	NP_187057.2	NAC domain containing protein 47	Arabidopsis thaliana	359
Ghi.1481.1.S1_at	DN781211	Ghi.1481	4.56388	0.943794	7.67745	0	12.3903	0	7.58446	0	3.49655	0.00854976	gb:DN781211 /DB_XREF=gi:84149911 /DB_XREF=G.hir-Cotyledon 1739 /TID=Ghi.1481.1 /CNT=4 /FEA=EST /TIER=ConsEnd /STK=0 /UG=Ghi.1481 /UG_TITLE=Transcribed locus, weakly similar to NP_188246.1 electron carrier electron transporter iron ion binding (Arabidopsis thaliana) /REP_ORG=G. hirsutum	weakly similar to NP_188246.1 electron carrier electron transporter iron ion binding (Arabidopsis thaliana	NP_188246.1	NDH-dependent cyclic electron flow 1	Arabidopsis thaliana	204
Ghi.3135.1.S1_at	DT469074	Ghi.3135	6.02977	0.372472	2.17469	0.0281106	5.87758	0	3.61465	0.23541	2.25157	0.403009	gb:DT469074 /DB_XREF=gi:73866336 /DB_XREF=GH_CHX22O18.r /CLONE=GH_CHX22O18 /TID=Ghi.3135.1 /CNT=5 /FEA=EST /TIER=ConsEnd /STK=1 /UG=Ghi.3135 /UG_TITLE=Transcribed locus, moderately similar to NP_174523.2 transporter (Arabidopsis thaliana) /REP_ORG=G. hirsutum	moderately similar to NP_174523.2 transporter (Arabidopsis thaliana	NP_174523.2	nitrate transporter 1.5	Arabidopsis thaliana	420
Gra.2239.1.S1_s_at	CO092078	Gra.2239	2.86696	1.26952	2.10011	0	5.96594	0	2.47189	0.35423	3.45206	0	gb:CO092078 /DB_XREF=gi:48790764 /DB_XREF=GR__Ea12O13.r /CLONE=GR__Ea12O13 /TID=Gra.2239.1 /CNT=4 /FEA=EST /TIER=ConsEnd /STK=1 /UG=Gra.2239 /UG_TITLE=Transcribed locus, strongly similar to NP_181241.1 phenylalanine ammonia-lyase 1 (PAL1) (Arabidopsis thaliana) /REP_ORG=G. raimondii	strongly similar to NP_181241.1 phenylalanine ammonia-lyase 1 (PAL1) (Arabidopsis thaliana	NP_181241.1	phenylalanine ammonia-lyase 1	Arabidopsis thaliana	725
Ghi.8745.1.A1_at	CA993566	Ghi.8745	3.55991	0.943794	7.50786	0	2.45612	0	3.42282	0.0585655	5.07526	0	gb:CA993566 /DB_XREF=gi:31073287 /DB_XREF=pAR08G07 /TID=Ghi.8745.1 /CNT=3 /FEA=EST /TIER=ConsEnd /STK=0 /UG=Ghi.8745 /UG_TITLE=Transcribed locus, moderately similar to NP_566139.1 protein tyrosineserinethreonine phosphatase (Arabidopsis thaliana) /REP_ORG=G. hirsutum	moderately similar to NP_566139.1 protein tyrosineserinethreonine phosphatase (Arabidopsis thaliana	NP_566139.1	protein like SEX4 1	Arabidopsis thaliana	591
Ghi.3038.1.A1_s_at	DT467565	Ghi.3038	4.5764	1.50613	5.63525	0	2.41601	0	3.74991	0.0585655	2.64215	0.0480414	gb:DT467565 /DB_XREF=gi:73864826 /DB_XREF=GH_CHX20J20.r /CLONE=GH_CHX20J20 /TID=Ghi.3038.1 /CNT=1 /FEA=EST /TIER=ConsEnd /STK=1 /UG=Ghi.3038 /UG_TITLE=Transcribed locus, weakly similar to NP_200515.1 ABI2 (ABA INSENSITIVE 2); protein phosphatase type 2C (Arabidopsis thaliana) /REP_ORG=G. hirsutum	weakly similar to NP_200515.1 ABI2 (ABA INSENSITIVE 2); protein phosphatase type 2C (Arabidopsis thaliana	NP_200515.1	protein phosphatase 2C 77	Arabidopsis thaliana	423
Ghi.255.1.S1_at	DR461411	Ghi.255	2.93343	1.16124	3.35095	0	4.24309	0	2.41394	0.182477	2.43268	0	gb:DR461411 /DB_XREF=gi:84172763 /DB_XREF=CM097B02 /TID=Ghi.255.1 /CNT=1 /FEA=EST /TIER=ConsEnd /STK=0 /UG=Ghi.255 /UG_TITLE=Transcribed locus, moderately similar to XP_469450.1 putative PAP_fibrillin (Oryza sativa (japonica cultivar-group)) /REP_ORG=G. hirsutum	moderately similar to XP_469450.1 putative PAP_fibrillin (Oryza sativa (japonica cultivar-group	XP_469450.1	putative PAP_fibrillin	Oryza sativa
Ghi.3596.3.S1_at	DT465566	Ghi.3596	2.17682	2.34402	3.74296	0	3.94192	0	3.09575	0.0585655	3.00412	0.00854976	gb:DT465566 /DB_XREF=gi:73862827 /DB_XREF=GH_CHX17J04.f /CLONE=GH_CHX17J04 /TID=Ghi.3596.3 /CNT=2 /FEA=EST /TIER=ConsEnd /STK=0 /UG=Ghi.3596 /UG_TITLE=Transcribed locus, moderately similar to NP_564504.1 catalytic protein phosphatase type 2C (Arabidopsis thaliana) /REP_ORG=G. hirsutum	moderately similar to NP_564504.1 catalytic protein phosphatase type 2C (Arabidopsis thaliana	NP_564504.1	putative protein phosphatase 2C 12	Arabidopsis thaliana	428
Ghi.10424.1.S1_s_at	CA993457	Ghi.10424	29.0097	0	17.2447	0	41.52	0	13.8468	0	24.2014	0	gb:CA993457 /DB_XREF=gi:31073178 /DB_XREF=pAR07H08 /TID=Ghi.10424.1 /CNT=7 /FEA=EST /TIER=ConsEnd /STK=0 /UG=Ghi.10424 /UG_TITLE=Transcribed locus, moderately similar to XP_478512.1 putative thiamine biosynthesis protein (Oryza sativa (japonica cultivar-group)) /REP_ORG=G. hirsutum	moderately similar to XP_478512.1 putative thiamine biosynthesis protein (Oryza sativa (japonica cultivar-group	XP_478512.1	putative thiamine biosynthesis protein	Oryza sativa (japonica cultivar-group)
Gra.1108.2.S1_s_at	CO099195	Gra.1108	11.4187	0.372472	4.4895	0	7.69439	0	5.36274	0	4.44951	0	gb:CO099195 /DB_XREF=gi:48797881 /DB_XREF=GR__Ea23O24.f /CLONE=GR__Ea23O24 /TID=Gra.1108.2 /CNT=6 /FEA=EST /TIER=ConsEnd /STK=0 /UG=Gra.1108 /UG_TITLE=Transcribed locus, moderately similar to XP_478512.1 putative thiamine biosynthesis protein (Oryza sativa (japonica cultivar-group)) /REP_ORG=G. raimondii	moderately similar to XP_478512.1 putative thiamine biosynthesis protein (Oryza sativa (japonica cultivar-group	XP_478512.1	putative thiamine biosynthesis protein	Oryza sativa (japonica cultivar-group)
Gra.2938.2.A1_at	CO085472	Gra.1108	13.2719	0	11.1557	0	13.9433	0	6.47371	0	5.49845	0	gb:CO085472 /DB_XREF=gi:48776106 /DB_XREF=GR__Ea02K12.r /CLONE=GR__Ea02K12 /TID=Gra.2938.2 /CNT=3 /FEA=EST /TIER=ConsEnd /STK=1 /UG=Gra.2938 /UG_TITLE=Transcribed locus, moderately similar to XP_478512.1 putative thiamine biosynthesis protein (Oryza sativa (japonica cultivar-group)) /REP_ORG=G. raimondii	moderately similar to XP_478512.1 putative thiamine biosynthesis protein (Oryza sativa (japonica cultivar-group	XP_478512.1	putative thiamine biosynthesis protein	Oryza sativa (japonica cultivar-group)
Ghi.5108.2.A1_s_at	DT047246	Ghi.17593	3.42408	1.26952	3.7103	0	3.08647	0	2.18381	0.182477	4.97089	0	gb:DT047246 /DB_XREF=gi:72269619 /DB_XREF=COT_CL_G06 /TID=Ghi.5108.2 /CNT=2 /FEA=EST /TIER=ConsEnd /STK=1 /UG=Ghi.5108 /UG_TITLE=Transcribed locus, moderately similar to NP_195678.1 DNA binding (Arabidopsis thaliana) /REP_ORG=G. hirsutum	moderately similar to NP_195678.1 DNA binding (Arabidopsis thaliana	NP_195678.1	SAP domain-containing protein	Arabidopsis thaliana	633
Ghi.9910.1.S1_s_at	DT048922	Ghi.9910	4.45585	0	2.37303	0	2.91453	0	3.41827	0	3.54025	0	gb:DT048922 /DB_XREF=gi:72272976 /DB_XREF=COT_DG_F04 /TID=Ghi.9910.1 /CNT=8 /FEA=EST /TIER=ConsEnd /STK=0 /UG=Ghi.9910 /UG_TITLE=Transcribed locus, moderately similar to NP_193027.2 SCPL20; serine carboxypeptidase (Arabidopsis thaliana) /REP_ORG=G. hirsutum	moderately similar to NP_193027.2 SCPL20; serine carboxypeptidase (Arabidopsis thaliana	NP_193027.2	SCPL20; serine carboxypeptidase	Arabidopsis thaliana
Gra.1008.2.A1_s_at	CO089149	Gra.1008	3.04391	0.372472	4.8545	0	2.76914	0	2.89717	0	4.4718	0	gb:CO089149 /DB_XREF=gi:48779783 /DB_XREF=GR__Ea08I02.r /CLONE=GR__Ea08I02 /TID=Gra.1008.2 /CNT=3 /FEA=EST /TIER=ConsEnd /STK=1 /UG=Gra.1008 /UG_TITLE=Transcribed locus, moderately similar to NP_190281.1 starch phosphorylase, putative (Arabidopsis thaliana) /REP_ORG=G. raimondii	moderately similar to NP_190281.1 starch phosphorylase	NP_190281.1	starch phosphorylase	Arabidopsis thaliana
Gra.2763.1.S1_s_at	CO089733	Gra.2763	7.00545	0	15.715	0	7.2741	0	3.70097	0	3.20666	0	gb:CO089733 /DB_XREF=gi:48780374 /DB_XREF=GR__Ea09F17.r /CLONE=GR__Ea09F17 /TID=Gra.2763.1 /CNT=4 /FEA=EST /TIER=ConsEnd /STK=2 /UG=Gra.2763 /UG_TITLE=Transcribed locus, weakly similar to NP_197519.1 expressed protein (Arabidopsis thaliana) /REP_ORG=G. raimondii	weakly similar to NP_197519.1 expressed protein (Arabidopsis thaliana	NP_197519.1	tetratricopeptide repeat domain-containing protein	Arabidopsis thaliana	290
Gra.70.1.S1_s_at	CO076413	Gra.1108	30.0067	0	18.6332	0	43.739	0	14.0357	0	25.8206	0	gb:CO076413 /DB_XREF=gi:48745894 /DB_XREF=GR__Ea37L20.r /CLONE=GR__Ea37L20 /TID=Gra.70.1 /CNT=188 /FEA=EST /TIER=ConsEnd /STK=0 /UG=Gra.70 /UG_TITLE=Transcribed locus, strongly similar to NP_200288.1 thiazole biosynthetic enzyme, chloroplast (ARA6) (THI1) (THI4) (Arabidopsis thaliana) /REP_ORG=G. raimondii	strongly similar to NP_200288.1 thiazole biosynthetic enzyme	NP_200288.1	thiazole biosynthetic enzyme	Arabidopsis thaliana	349
Ghi.4975.1.S1_x_at	DT048279	Ghi.4975	2.98906	1.26952	5.18136	0	5.08582	0	2.00584	2.64786	4.28449	0	gb:DT048279 /DB_XREF=gi:72271678 /DB_XREF=COT_CY_F10 /TID=Ghi.4975.1 /CNT=5 /FEA=EST /TIER=ConsEnd /STK=1 /UG=Ghi.4975 /UG_TITLE=Transcribed locus, strongly similar to NP_177894.1 unknown protein (Arabidopsis thaliana) /REP_ORG=G. hirsutum	strongly similar to NP_177894.1 unknown protein (Arabidopsis thaliana	NP_177894.1	ubiquitin-fold modifier 1	Arabidopsis thaliana	93
Ghi.10013.1.A1_s_at	DR454298	Ghi.10013	2.48377	2.34402	2.18983	0	3.01638	0	3.44874	0	2.13725	0.0238141	gb:DR454298 /DB_XREF=gi:84165650 /DB_XREF=CM022C10 /TID=Ghi.10013.1 /CNT=13 /FEA=EST /TIER=ConsEnd /STK=0 /UG=Ghi.10013 /UG_TITLE=Transcribed locus, moderately similar to NP_850394.1 unknown protein (Arabidopsis thaliana) /REP_ORG=G. hirsutum	moderately similar to NP_850394.1 unknown protein (Arabidopsis thaliana	NP_850394.1	uncharacterized protein	Arabidopsis thaliana	189
Ghi.4635.1.A1_x_at	DT051785	Ghi.4635	5.80379	0	12.102	0	8.06198	0	3.66455	0	5.12933	0	gb:DT051785 /DB_XREF=gi:72278944 /DB_XREF=COT_EQ_B10 /TID=Ghi.4635.1 /CNT=2 /FEA=EST /TIER=ConsEnd /STK=2 /UG=Ghi.4635 /UG_TITLE=Transcribed locus, moderately similar to NP_176109.2 unknown protein (Arabidopsis thaliana) /REP_ORG=G. hirsutum	moderately similar to NP_176109.2 unknown protein (Arabidopsis thaliana	NP_176109.2	uncharacterized protein	Arabidopsis thaliana
Ghi.5727.1.A1_at	DT046456	Ghi.8740	4.88959	0.372472	11.5552	0	10.801	0	2.53744	0.0648547	3.50622	0	gb:DT046456 /DB_XREF=gi:72267816 /DB_XREF=COT_AB_A12 /TID=Ghi.5727.1 /CNT=2 /FEA=EST /TIER=ConsEnd /STK=1 /UG=Ghi.5727 /UG_TITLE=Transcribed locus, weakly similar to NP_193090.1 unknown protein (Arabidopsis thaliana) /REP_ORG=G. hirsutum	weakly similar to NP_193090.1 unknown protein (Arabidopsis thaliana	NP_193090.1	uncharacterized protein	Arabidopsis thaliana	210
Ghi.6812.1.S1_at	CA993049	Ghi.6812	3.73151	0	4.6567	0	5.4961	0	2.00255	2.64786	5.86085	0	gb:CA993049 /DB_XREF=gi:31072770 /DB_XREF=pAR04A06 /TID=Ghi.6812.1 /CNT=1 /FEA=EST /TIER=ConsEnd /STK=0 /UG=Ghi.6812 /UG_TITLE=Transcribed locus, moderately similar to NP_683398.1 unknown protein (Arabidopsis thaliana) /REP_ORG=G. hirsutum	moderately similar to NP_683398.1 unknown protein (Arabidopsis thaliana	NP_683398.1	uncharacterized protein	Arabidopsis thaliana	219
Ghi.5099.1.A1_at	DT049104	Ghi.5099	2.02818	2.34402	3.69969	0	2.75116	0	2.07782	0.118058	3.15177	0	gb:DT049104 /DB_XREF=gi:72273338 /DB_XREF=COT_DI_H02 /TID=Ghi.5099.1 /CNT=1 /FEA=EST /TIER=ConsEnd /STK=1 /UG=Ghi.5099 /UG_TITLE=Transcribed locus /REP_ORG=G. hirsutum
Ghi.597.1.S1_at	DR457132	Ghi.597	4.00082	1.50613	7.10535	0	8.83014	0	3.68856	0.118058	5.30388	0	gb:DR457132 /DB_XREF=gi:84168484 /DB_XREF=CM052A08 /TID=Ghi.597.1 /CNT=1 /FEA=EST /TIER=ConsEnd /STK=0 /UG=Ghi.597 /UG_TITLE=Transcribed locus /REP_ORG=G. hirsutum
Ghi.6477.1.S1_at	DT050240	Ghi.6477	3.62664	2.34402	5.78076	0	6.68203	0	2.12844	0.920323	7.62252	0	gb:DT050240 /DB_XREF=gi:72275652 /DB_XREF=COT_DX_A08 /TID=Ghi.6477.1 /CNT=2 /FEA=EST /TIER=ConsEnd /STK=1 /UG=Ghi.6477 /UG_TITLE=Transcribed locus /REP_ORG=G. hirsutum
Ghi.6596.1.S1_at	CB350417	Ghi.6596	2.92078	0	7.38667	0	6.98091	0	3.34216	0	2.70191	0.0238141	gb:CB350417 /DB_XREF=gi:30841097 /DB_XREF=P1C06 /TID=Ghi.6596.1 /CNT=1 /FEA=EST /TIER=ConsEnd /STK=0 /UG=Ghi.6596 /UG_TITLE=Transcribed locus /REP_ORG=G. hirsutum
Ghi.6734.1.S1_x_at	CA993424	Ghi.6734	2.59437	1.50613	4.67071	0	6.98514	0	3.6983	0	4.41911	0	gb:CA993424 /DB_XREF=gi:31073145 /DB_XREF=pAR07E10 /TID=Ghi.6734.1 /CNT=2 /FEA=EST /TIER=ConsEnd /STK=0 /UG=Ghi.6734 /UG_TITLE=Transcribed locus /REP_ORG=G. hirsutum
Ghi.688.1.S1_at	DR456188	Ghi.688	4.80158	0.372472	8.0738	0	7.08657	0	2.79281	0	6.03255	0	gb:DR456188 /DB_XREF=gi:84167540 /DB_XREF=CM042B05 /TID=Ghi.688.1 /CNT=1 /FEA=EST /TIER=ConsEnd /STK=0 /UG=Ghi.688 /UG_TITLE=Transcribed locus /REP_ORG=G. hirsutum
Ghi.6982.1.A1_x_at	AJ513446	Ghi.6982	3.92797	4.15601	8.45454	0	7.61816	0	2.94793	0	5.33082	0	gb:AJ513446 /DB_XREF=gi:24976929 /DB_XREF=AJ513446 /CLONE=suo22c08r3 /TID=Ghi.6982.1 /CNT=3 /FEA=EST /TIER=ConsEnd /STK=0 /UG=Ghi.6982 /UG_TITLE=Transcribed locus /REP_ORG=G. hirsutum
GhiAffx.1589.7.S1_at	DW512953.1	Ghi.18525	2.54476	1.16124	5.92079	0	4.96942	0	2.77542	0.0648547	3.79378	0	gb:DW512953.1 dbest_id:35118736 /TID=GhiAffx.1589.7 /CNT=3 /FEA=EST /TIER=ConsEnd /STK=1 /NOTE=sequence(s) not in UniGene /REP_ORG=
GhiAffx.16292.1.S1_at	DW229918.1	Ghi.6956	2.79958	1.26952	4.22804	0	5.05263	0	2.53487	0.182477	4.67584	0	gb:DW229918.1 dbest_id:34834090 /TID=GhiAffx.16292.1 /CNT=2 /FEA=EST /TIER=ConsEnd /STK=1 /NOTE=sequence(s) not in UniGene /REP_ORG=
GhiAffx.19697.1.A1_s_at	DW227913.1	Ghi.10366	2.07847	1.50613	14.5394	0	6.31658	0	5.36766	0	13.7852	0.0366566	gb:DW227913.1 dbest_id:34832085 /TID=GhiAffx.19697.1 /CNT=3 /FEA=EST /TIER=ConsEnd /STK=1 /NOTE=sequence(s) not in UniGene /REP_ORG=
GhiAffx.22525.1.A1_at	DW520591.1	Ghi.11784	2.38418	1.26952	2.90304	0	3.45927	0	2.00921	0.453345	2.20105	0	gb:DW520591.1 dbest_id:35126374 /TID=GhiAffx.22525.1 /CNT=5 /FEA=EST /TIER=ConsEnd /STK=1 /NOTE=sequence(s) not in UniGene /REP_ORG=
GhiAffx.24792.1.S1_at	DW225170.1	Ghi.15235	2.65198	1.50613	5.10045	0	6.94648	0	5.5577	0	2.07536	0.0366566	gb:DW225170.1 dbest_id:34829342 /TID=GhiAffx.24792.1 /CNT=5 /FEA=EST /TIER=ConsEnd /STK=1 /NOTE=sequence(s) not in UniGene /REP_ORG=
GhiAffx.25508.1.S1_at	DW496030.1	Ghi.12856	10.9483	0	6.12683	0	2.70071	0	12.259	0	33.0891	0	gb:DW496030.1 dbest_id:35100458 /TID=GhiAffx.25508.1 /CNT=4 /FEA=EST /TIER=ConsEnd /STK=1 /NOTE=sequence(s) not in UniGene /REP_ORG=
GhiAffx.25700.1.A1_at	DW517728.1	---	2.07541	2.34402	5.93705	0	5.00396	0	2.98635	0	4.37474	0	gb:DW517728.1 dbest_id:35123511 /TID=GhiAffx.25700.1 /CNT=2 /FEA=EST /TIER=ConsEnd /STK=1 /NOTE=sequence(s) not in UniGene /REP_ORG=
GhiAffx.26539.1.A1_x_at	DW504732.1	Ghi.22252	4.90911	0	7.64433	0	6.6247	0	3.05284	0.0648547	7.39313	0	gb:DW504732.1 dbest_id:35110515 /TID=GhiAffx.26539.1 /CNT=3 /FEA=EST /TIER=ConsEnd /STK=1 /NOTE=sequence(s) not in UniGene /REP_ORG=
GhiAffx.26774.1.A1_s_at	DW243662.1	---	2.72373	1.16124	3.69908	0	3.21863	0	6.19661	0	10.0702	0	gb:DW243662.1 dbest_id:34847828 /TID=GhiAffx.26774.1 /CNT=2 /FEA=EST /TIER=ConsEnd /STK=1 /NOTE=sequence(s) not in UniGene /REP_ORG=
GhiAffx.28270.1.S1_at	DW483597.1	Ghi.12206	2.69051	0.372472	4.10067	0	2.09866	0	2.98034	0.0585655	3.48024	0	gb:DW483597.1 dbest_id:35088025 /TID=GhiAffx.28270.1 /CNT=5 /FEA=EST /TIER=ConsEnd /STK=0 /NOTE=sequence(s) not in UniGene /REP_ORG=
GhiAffx.31245.2.S1_at	DT464169	---	3.85409	0.372472	5.89274	0	16.3377	0	16.4703	0	20.7497	0	gb:DT464169 /DB_XREF=gi:73861430 /DB_XREF=GH_CHX15C13.f /CLONE=GH_CHX15C13 /TID=GhiAffx.31245.2 /CNT=3 /FEA=EST /TIER=ConsEnd /STK=0 /NOTE=sequence(s) not in UniGene /REP_ORG=G. hirsutum
GhiAffx.33971.1.S1_at	DW513106.1	Ghi.14181	4.47048	0	3.1924	0	6.34574	0	2.29579	0.317514	3.61663	0	gb:DW513106.1 dbest_id:35118889 /TID=GhiAffx.33971.1 /CNT=3 /FEA=EST /TIER=ConsEnd /STK=0 /NOTE=sequence(s) not in UniGene /REP_ORG=
GhiAffx.3890.1.A1_at	DR457150	Ghi.10377	2.78198	2.34402	3.57854	0	3.59008	0	2.8584	0	4.86693	0	gb:DR457150 /DB_XREF=gi:84168502 /DB_XREF=CM052C02 /TID=GhiAffx.3890.1 /CNT=3 /FEA=EST /TIER=ConsEnd /STK=0 /NOTE=sequence(s) not in UniGene /REP_ORG=G. hirsutum
GhiAffx.40901.1.S1_at	DW500212.1	Ghi.18488	2.31428	1.26952	2.84594	0	4.22332	0	2.89474	0.0648547	4.11898	0	gb:DW500212.1 dbest_id:35104640 /TID=GhiAffx.40901.1 /CNT=2 /FEA=EST /TIER=ConsEnd /STK=1 /NOTE=sequence(s) not in UniGene /REP_ORG=
GhiAffx.43681.1.S1_at	DW514692.1	Ghi.21954	2.59567	2.34402	5.96808	0	5.2547	0	2.94475	0.0648547	2.09774	0.257021	gb:DW514692.1 dbest_id:35120475 /TID=GhiAffx.43681.1 /CNT=2 /FEA=EST /TIER=ConsEnd /STK=0 /NOTE=sequence(s) not in UniGene /REP_ORG=
GhiAffx.46794.1.S1_at	DW511353.1	Ghi.15328	2.66126	1.50613	6.69252	0	9.54322	0	5.51808	0	6.14597	0	gb:DW511353.1 dbest_id:35117136 /TID=GhiAffx.46794.1 /CNT=10 /FEA=EST /TIER=ConsEnd /STK=0 /NOTE=sequence(s) not in UniGene /REP_ORG=
GhiAffx.47722.1.A1_at	DT459113	---	3.29829	2.34402	3.45563	0	3.85972	0	2.06974	0.453345	4.09181	0	gb:DT459113 /DB_XREF=gi:73850093 /DB_XREF=GH_ON37C20.r /CLONE=GH_ON37C20 /TID=GhiAffx.47722.1 /CNT=2 /FEA=EST /TIER=ConsEnd /STK=1 /NOTE=sequence(s) not in UniGene /REP_ORG=G. hirsutum
GhiAffx.47722.1.S1_at	DT459113	---	6.27396	4.15601	7.18935	0	5.91387	0	3.11292	0.0648547	6.90721	0	gb:DT459113 /DB_XREF=gi:73850093 /DB_XREF=GH_ON37C20.r /CLONE=GH_ON37C20 /TID=GhiAffx.47722.1 /CNT=2 /FEA=EST /TIER=ConsEnd /STK=0 /NOTE=sequence(s) not in UniGene /REP_ORG=G. hirsutum
GhiAffx.63874.1.S1_at	DW241013.1	Ghi.13355	5.1447	0.677804	9.82319	0	10.4787	0	4.38044	0	9.89917	0	gb:DW241013.1 dbest_id:34845179 /TID=GhiAffx.63874.1 /CNT=4 /FEA=EST /TIER=ConsEnd /STK=0 /NOTE=sequence(s) not in UniGene /REP_ORG=
GhiAffx.6667.1.A1_s_at	DW503015.1	---	2.45496	3.91728	4.53143	0	4.23111	0	10.0643	0	5.59205	0	gb:DW503015.1 dbest_id:35107443 /TID=GhiAffx.6667.1 /CNT=1 /FEA=EST /TIER=ConsEnd /STK=1 /NOTE=sequence(s) not in UniGene /REP_ORG=
GhiAffx.7880.1.S1_at	DW498669.1	Ghi.15995	5.91701	0	3.36487	0	2.14197	0	2.25563	0.23541	5.27975	0	gb:DW498669.1 dbest_id:35103097 /TID=GhiAffx.7880.1 /CNT=5 /FEA=EST /TIER=ConsEnd /STK=2 /NOTE=sequence(s) not in UniGene /REP_ORG=
GraAffx.24598.2.A1_s_at	CO093765	---	2.03936	3.51349	2.61882	0	5.15196	0	4.65348	0.0648547	2.04471	0.0480414	gb:CO093765 /DB_XREF=gi:48792451 /DB_XREF=GR__Ea15I10.r /CLONE=GR__Ea15I10 /TID=GraAffx.24598.2 /CNT=1 /FEA=EST /TIER=ConsEnd /STK=1 /NOTE=sequence(s) not in UniGene /REP_ORG=G. raimondii
GraAffx.28264.1.A1_s_at	CO091105	---	2.84707	3.91728	5.91551	0	6.41415	0	2.49366	0.0648547	3.80517	0	gb:CO091105 /DB_XREF=gi:48789791 /DB_XREF=GR__Ea11G21.r /CLONE=GR__Ea11G21 /TID=GraAffx.28264.1 /CNT=4 /FEA=EST /TIER=ConsEnd /STK=0 /NOTE=sequence(s) not in UniGene /REP_ORG=G. raimondii
GraAffx.9604.1.S1_s_at	CO087680	---	19.7293	0	81.3238	0	44.6933	0	29.864	0	15.2039	0	gb:CO087680 /DB_XREF=gi:48778314 /DB_XREF=GR__Ea06E05.r /CLONE=GR__Ea06E05 /TID=GraAffx.9604.1 /CNT=8 /FEA=EST /TIER=ConsEnd /STK=3 /NOTE=sequence(s) not in UniGene /REP_ORG=G. raimondii
Gra.1865.1.A1_s_at	CO111570	Gra.1865	0.415576	4.15601	0.243665	0	0.175394	0	0.486133	0.35423	0.317329	0	gb:CO111570 /DB_XREF=gi:48810257 /DB_XREF=GR__Eb0047L12.r /CLONE=GR__Eb0047L12 /TID=Gra.1865.1 /CNT=1 /FEA=EST /TIER=ConsEnd /STK=1 /UG=Gra.1865 /UG_TITLE=Transcribed locus, weakly similar to NP_192425.1 4-coumarate--CoA ligase, putative 4-coumaroyl-CoA synthase, putative (Arabidopsis thaliana) /REP_ORG=G. raimondii	weakly similar to NP_192425.1 4-coumarate--CoA ligase	NP_192425.1	4-coumarate--CoA ligase-like 7	Arabidopsis thaliana	544
Gra.2021.1.A1_at	CO130751	Gra.2021	0.420423	3.91728	0.226957	0	0.187093	0	0.379286	0.453345	0.246783	0	gb:CO130751 /DB_XREF=gi:48879729 /DB_XREF=GR__Eb33K14.r /CLONE=GR__Eb33K14 /TID=Gra.2021.1 /CNT=11 /FEA=EST /TIER=ConsEnd /STK=2 /UG=Gra.2021 /UG_TITLE=Transcribed locus, moderately similar to NP_187574.1 60S ribosomal protein L4L1 (RPL4A) (Arabidopsis thaliana) /REP_ORG=G. raimondii	moderately similar to NP_187574.1 60S ribosomal protein L4L1 (RPL4A) (Arabidopsis thaliana	NP_187574.1	60S ribosomal protein L4-1	Arabidopsis thaliana	406
Gra.2306.1.A1_s_at	CO128525	Gra.3674	0.300335	4.15601	0.144609	0	0.452508	0	0.276047	0.229225	0.447848	0.333638	gb:CO128525 /DB_XREF=gi:48830135 /DB_XREF=GR__Eb25F24.r /CLONE=GR__Eb25F24 /TID=Gra.2306.1 /CNT=8 /FEA=EST /TIER=ConsEnd /STK=1 /UG=Gra.2306 /UG_TITLE=Transcribed locus, moderately similar to NP_199747.1 glycosyl hydrolase family 3 protein (Arabidopsis thaliana) /REP_ORG=G. raimondii	moderately similar to NP_199747.1 glycosyl hydrolase family 3 protein (Arabidopsis thaliana	NP_199747.1	beta-xylosidase 1	Arabidopsis thaliana	774
Ghi.2515.2.A1_s_at	DT559528	Ghi.2515	0.357299	1.50613	0.201668	0	0.148921	0	0.386705	0.35423	0.317243	0.0238141	gb:DT559528 /DB_XREF=gi:78339254 /DB_XREF=EST1070168 /TID=Ghi.2515.2 /CNT=4 /FEA=EST /TIER=ConsEnd /STK=0 /UG=Ghi.2515 /UG_TITLE=Transcribed locus, moderately similar to NP_192898.2 NTRB (Arabidopsis thaliana) /REP_ORG=G. hirsutum	moderately similar to NP_192898.2 NTRB (Arabidopsis thaliana	NP_192898.2	C2 calcium/lipid-binding and phosphoribosyltransferase C-terminal domain-containing protein	Arabidopsis thaliana	1011
Gra.771.1.A1_at	CO112700	Gra.771	0.417217	3.91728	0.279399	0	0.267313	0	0.451639	0.453345	0.272244	0	gb:CO112700 /DB_XREF=gi:48811387 /DB_XREF=GR__Eb0049I08.r /CLONE=GR__Eb0049I08 /TID=Gra.771.1 /CNT=11 /FEA=EST /TIER=Stack /STK=6 /UG=Gra.771 /UG_TITLE=Transcribed locus, moderately similar to NP_187652.1 serine carboxypeptidase III, putative (Arabidopsis thaliana) /REP_ORG=G. raimondii	moderately similar to NP_187652.1 serine carboxypeptidase III	NP_187652.1	carboxypeptidase	Arabidopsis thaliana	516
Gra.1880.1.S1_s_at	CO106117	Gra.1880	0.344686	4.15601	0.27872	0.00334008	0.173569	0	0.442444	1.43034	0.211342	0.0292223	gb:CO106117 /DB_XREF=gi:48804803 /DB_XREF=GR__Eb0036J21.r /CLONE=GR__Eb0036J21 /TID=Gra.1880.1 /CNT=4 /FEA=EST /TIER=ConsEnd /STK=1 /UG=Gra.1880 /UG_TITLE=Transcribed locus, moderately similar to NP_196549.1 cellulose synthase, catalytic subunit, putative (Arabidopsis thaliana) /REP_ORG=G. raimondii	moderately similar to NP_196549.1 cellulose synthase	NP_196549.1	cellulose synthase	Arabidopsis thaliana
Gra.2037.1.A1_at	CO129906	Gra.2037	0.382202	2.88095	0.268702	0	0.186955	0	0.408036	0.685605	0.21023	0	gb:CO129906 /DB_XREF=gi:48878884 /DB_XREF=GR__Eb31G01.r /CLONE=GR__Eb31G01 /TID=Gra.2037.1 /CNT=7 /FEA=EST /TIER=ConsEnd /STK=1 /UG=Gra.2037 /UG_TITLE=Transcribed locus, moderately similar to NP_178266.1 gibberellin response modulator (RGA1) gibberellin-responsive modulator (Arabidopsis thaliana) /REP_ORG=G. raimondii	moderately similar to NP_178266.1 gibberellin response modulator (RGA1)gibberellin-responsive modulator (Arabidopsis thaliana	NP_178266.1	DELLA protein RGA	Arabidopsis thaliana	587
Gra.1266.1.A1_s_at	CO131241	Gra.1266	0.489621	3.91728	0.38885	0	0.321515	0	0.32591	0.104481	0.499269	0.168033	gb:CO131241 /DB_XREF=gi:48880219 /DB_XREF=GR__Eb43H01.r /CLONE=GR__Eb43H01 /TID=Gra.1266.1 /CNT=1 /FEA=EST /TIER=ConsEnd /STK=1 /UG=Gra.1266 /UG_TITLE=Transcribed locus, moderately similar to NP_198752.1 circadian clock coupling factor-related (Arabidopsis thaliana) /REP_ORG=G. raimondii	moderately similar to NP_198752.1 circadian clock coupling factor-related (Arabidopsis thaliana	NP_198752.1	EID1-like F-box protein 2	Arabidopsis thaliana	249
Ghi.4158.2.S1_s_at	DT456384	Ghi.4158	0.216974	0	0.253427	0	0.120995	0	0.456067	0.685605	0.130034	0	gb:DT456384 /DB_XREF=gi:73847364 /DB_XREF=GH_ON15B09.f /CLONE=GH_ON15B09 /TID=Ghi.4158.2 /CNT=2 /FEA=EST /TIER=ConsEnd /STK=0 /UG=Ghi.4158 /UG_TITLE=Transcribed locus, weakly similar to NP_565597.1 EBF1 (EIN3-BINDING F BOX PROTEIN 1); ubiquitin-protein ligase (Arabidopsis thaliana) /REP_ORG=G. hirsutum	weakly similar to NP_565597.1 EBF1 (EIN3-BINDING F BOX PROTEIN 1); ubiquitin-protein ligase (Arabidopsis thaliana	NP_565597.1	EIN3-binding F-box protein 1	Arabidopsis thaliana	628
Ghi.7449.1.S1_at	AI727371	Ghi.17089	0.445439	4.15601	0.293208	0	0.339531	0	0.327927	0	0.256261	0	gb:AI727371 /DB_XREF=gi:5046223 /DB_XREF=BNLGHi7889 /TID=Ghi.7449.1 /CNT=5 /FEA=EST /TIER=ConsEnd /STK=0 /UG=Ghi.7449 /UG_TITLE=Transcribed locus, weakly similar to NP_178471.1 ST; sulfotransferase (Arabidopsis thaliana) /REP_ORG=G. hirsutum	weakly similar to NP_178471.1 ST; sulfotransferase (Arabidopsis thaliana	NP_178471.1	flavonol sulfotransferase-like protein	Arabidopsis thaliana	326
Ghi.746.2.A1_at	DT573122	Ghi.16951	0.319664	1.89298	0.394194	0.020122	0.441678	0.125743	0.448749	0.685605	0.302707	0.0480414	gb:DT573122 /DB_XREF=gi:78352848 /DB_XREF=EST1083762 /TID=Ghi.746.2 /CNT=8 /FEA=EST /TIER=ConsEnd /STK=0 /UG=Ghi.746 /UG_TITLE=Transcribed locus, strongly similar to XP_470141.1 heat shock protein cognate 70 (Oryza sativa (japonica cultivar-group)) /REP_ORG=G. hirsutum	strongly similar to XP_470141.1 heat shock protein cognate 70 (Oryza sativa (japonica cultivar-group	XP_470141.1	heat shock protein cognate 70	Oryza sativa (japonica cultivar-group)
Ghi.9308.1.S1_at	DT527234	Ghi.9308	0.0806955	0.598213	0.0305533	0	0.0474575	0	0.178588	0.182477	0.0703418	0	gb:DT527234 /DB_XREF=gi:73943926 /DB_XREF=GH_OCF06C11.f /CLONE=GH_OCF06C11 /TID=Ghi.9308.1 /CNT=8 /FEA=EST /TIER=ConsEnd /STK=0 /UG=Ghi.9308 /UG_TITLE=Transcribed locus, moderately similar to NP_180511.1 unknown protein (Arabidopsis thaliana) /REP_ORG=G. hirsutum	moderately similar to NP_180511.1 unknown protein (Arabidopsis thaliana	NP_180511.1	HSP20 family protein	Arabidopsis thaliana	153
Gra.636.2.A1_s_at	CO131512	Gra.2102	0.297072	2.47278	0.212306	0	0.0844453	0	0.464954	1.43034	0.134058	0	gb:CO131512 /DB_XREF=gi:48880490 /DB_XREF=GR__Eb43N13.r /CLONE=GR__Eb43N13 /TID=Gra.636.2 /CNT=3 /FEA=EST /TIER=ConsEnd /STK=2 /UG=Gra.636 /UG_TITLE=Transcribed locus, weakly similar to NP_195741.1 transferase family protein (Arabidopsis thaliana) /REP_ORG=G. raimondii	weakly similar to NP_195741.1 transferase family protein (Arabidopsis thaliana	NP_195741.1	HXXXD-type acyl-transferase-like protein	Arabidopsis thaliana	475
Gra.971.2.A1_s_at	CO069765	---	0.285798	0.598213	0.415546	0.00619608	0.336069	0	0.340349	0.104481	0.414341	0.168033	gb:CO069765 /DB_XREF=gi:48739246 /DB_XREF=GR__Ea26I01.r /CLONE=GR__Ea26I01 /TID=Gra.971.2 /CNT=1 /FEA=EST /TIER=ConsEnd /STK=1 /UG=Gra.971 /UG_TITLE=Transcribed locus, moderately similar to NP_563980.2 leucine-rich repeat family protein (Arabidopsis thaliana) /REP_ORG=G. raimondii	moderately similar to NP_563980.2 leucine-rich repeat family protein (Arabidopsis thaliana	NP_563980.2	leucine-rich repeat-containing protein	Arabidopsis thaliana	585
Gra.1111.1.A1_at	CO074501	Gra.1111	0.350595	3.51349	0.250553	0	0.155904	0	0.317915	0.104481	0.17018	0	gb:CO074501 /DB_XREF=gi:48743982 /DB_XREF=GR__Ea34K07.r /CLONE=GR__Ea34K07 /TID=Gra.1111.1 /CNT=2 /FEA=EST /TIER=ConsEnd /STK=1 /UG=Gra.1111 /UG_TITLE=Transcribed locus, moderately similar to NP_174901.1 nitrate reductase 2 (NR2) (Arabidopsis thaliana) /REP_ORG=G. raimondii	moderately similar to NP_174901.1 nitrate reductase 2 (NR2) (Arabidopsis thaliana	NP_174901.1	Nitrate reductase (NADH)	Arabidopsis thaliana
Gra.2247.1.S1_at	CO119248	Gra.2247	0.156377	0	0.0729197	0	0.0567551	0	0.363291	0.229225	0.128497	0	gb:CO119248 /DB_XREF=gi:48817935 /DB_XREF=GR__Eb022A22.r /CLONE=GR__Eb022A22 /TID=Gra.2247.1 /CNT=3 /FEA=EST /TIER=ConsEnd /STK=1 /UG=Gra.2247 /UG_TITLE=Transcribed locus, moderately similar to NP_850084.1 nitrate transporter (NTP2) (Arabidopsis thaliana) /REP_ORG=G. raimondii	moderately similar to NP_850084.1 nitrate transporter (NTP2) (Arabidopsis thaliana	NP_850084.1	nitrate transporter 1.4	Arabidopsis thaliana	577
Gra.2247.2.A1_at	CO111215	Gra.2247	0.208879	0	0.106707	0	0.0914461	0	0.344351	0.23541	0.119696	0	gb:CO111215 /DB_XREF=gi:48809901 /DB_XREF=GR__Eb0047C01.r /CLONE=GR__Eb0047C01 /TID=Gra.2247.2 /CNT=2 /FEA=EST /TIER=ConsEnd /STK=1 /UG=Gra.2247 /UG_TITLE=Transcribed locus, moderately similar to NP_850084.1 nitrate transporter (NTP2) (Arabidopsis thaliana) /REP_ORG=G. raimondii	moderately similar to NP_850084.1 nitrate transporter (NTP2) (Arabidopsis thaliana	NP_850084.1	nitrate transporter 1.4	Arabidopsis thaliana	577
Gra.2981.1.S1_at	CO113368	Gra.2981	0.416524	3.51349	0.255376	0	0.208051	0	0.373232	0.317514	0.288452	0	gb:CO113368 /DB_XREF=gi:48812055 /DB_XREF=GR__Eb013J01.r /CLONE=GR__Eb013J01 /TID=Gra.2981.1 /CNT=6 /FEA=EST /TIER=ConsEnd /STK=0 /UG=Gra.2981 /UG_TITLE=Transcribed locus, moderately similar to XP_474407.1 OSJNBa0088H09.3 (Oryza sativa (japonica cultivar-group)) /REP_ORG=G. raimondii	moderately similar to XP_474407.1 OSJNBa0088H09.3 (Oryza sativa (japonica cultivar-group	XP_474407.1	OSJNBa0088H09.3	Oryza sativa (japonica cultivar-group)
Gra.1483.2.S1_at	CO127914	Gra.3065	0.363136	4.15601	0.155542	0	0.160743	0	0.366341	0.35423	0.153265	0	gb:CO127914 /DB_XREF=gi:48829524 /DB_XREF=GR__Eb12L18.f /CLONE=GR__Eb12L18 /TID=Gra.1483.2 /CNT=3 /FEA=EST /TIER=ConsEnd /STK=0 /UG=Gra.1483 /UG_TITLE=Transcribed locus, moderately similar to NP_188048.1 pectinesterase family protein (Arabidopsis thaliana) /REP_ORG=G. raimondii	moderately similar to NP_188048.1 pectinesterase family protein (Arabidopsis thaliana	NP_188048.1	pectinesterase 3	Arabidopsis thaliana	592
Ghi.7959.2.S1_s_at	DT527581	Ghi.7959	0.391341	3.91728	0.327386	0	0.291353	0	0.282697	0.229225	0.300302	0.0292223	gb:DT527581 /DB_XREF=gi:73944273 /DB_XREF=GH_OCF10F05.f /CLONE=GH_OCF10F05 /TID=Ghi.7959.2 /CNT=13 /FEA=EST /TIER=ConsEnd /STK=0 /UG=Ghi.7959 /UG_TITLE=Transcribed locus, strongly similar to NP_195722.2 ATP binding kinase protein kinase protein serinethreonine kinase protein-tyrosine kinase (Arabidopsis thaliana) /REP_ORG=G. hirsutum	strongly similar to NP_195722.2 ATP binding kinase protein kinase protein serinethreonine kinase protein-tyrosine kinase (Arabidopsis thaliana	NP_195722.2	protein kinase family protein	Arabidopsis thaliana	410
Gra.1312.2.S1_s_at	CO085934	Gra.1312	0.292802	0	0.281958	0	0.189543	0	0.179087	0	0.26489	0	gb:CO085934 /DB_XREF=gi:48776568 /DB_XREF=GR__Ea03I02.f /CLONE=GR__Ea03I02 /TID=Gra.1312.2 /CNT=3 /FEA=EST /TIER=ConsEnd /STK=0 /UG=Gra.1312 /UG_TITLE=Transcribed locus, moderately similar to NP_190990.1 scarecrow transcription factor, putative (Arabidopsis thaliana) /REP_ORG=G. raimondii	moderately similar to NP_190990.1 scarecrow transcription factor	NP_190990.1	protein scarecrow	Arabidopsis thaliana	653
Ghi.1032.3.S1_at	DT466769	Ghi.1032	0.414284	4.15601	0.393221	0.00619608	0.373806	0	0.230533	0.104481	0.436614	0.114153	gb:DT466769 /DB_XREF=gi:73864030 /DB_XREF=GH_CHX19G04.f /CLONE=GH_CHX19G04 /TID=Ghi.1032.3 /CNT=7 /FEA=EST /TIER=ConsEnd /STK=0 /UG=Ghi.1032 /UG_TITLE=Transcribed locus, moderately similar to XP_482784.1 putative 12-oxophytodienoate reductase (Oryza sativa (japonica cultivar-group)) /REP_ORG=G. hirsutum	moderately similar to XP_482784.1 putative 12-oxophytodienoate reductase (Oryza sativa (japonica cultivar-group	XP_482784.1	putative 12-oxophytodienoate reductase	Oryza sativa (japonica cultivar-group)
Gra.3008.1.A1_at	CO075966	Gra.3008	0.357658	4.15601	0.117484	0	0.110365	0	0.309542	0	0.204542	0	gb:CO075966 /DB_XREF=gi:48745447 /DB_XREF=GR__Ea37B07.r /CLONE=GR__Ea37B07 /TID=Gra.3008.1 /CNT=2 /FEA=EST /TIER=ConsEnd /STK=1 /UG=Gra.3008 /UG_TITLE=Transcribed locus, strongly similar to XP_463952.1 putative 3-isopropylmalate dehydratase large subunit (Oryza sativa (japonica cultivar-group)) /REP_ORG=G. raimondii	strongly similar to XP_463952.1 putative 3-isopropylmalate dehydratase large subunit (Oryza sativa (japonica cultivar-group	XP_463952.1	putative 3-isopropylmalate dehydratase large subunit	Oryza sativa (japonica cultivar-group)
Ghi.316.2.S1_s_at	DT559985	Ghi.16916	0.479331	4.15601	0.255226	0	0.224058	0	0.493572	0.920323	0.348706	0	gb:DT559985 /DB_XREF=gi:78339711 /DB_XREF=EST1070625 /TID=Ghi.316.2 /CNT=17 /FEA=EST /TIER=ConsEnd /STK=0 /UG=Ghi.316 /UG_TITLE=Transcribed locus, strongly similar to XP_465992.1 putative elongation factor 2 (Oryza sativa (japonica cultivar-group)) /REP_ORG=G. hirsutum	strongly similar to XP_465992.1 putative elongation factor 2 (Oryza sativa (japonica cultivar-group	XP_465992.1	putative elongation factor 2	Oryza sativa (japonica cultivar-group)
Gra.2453.1.S1_x_at	CO122668	Gra.2453	0.458292	4.15601	0.246368	0	0.272405	0	0.431121	0.35423	0.256253	0	gb:CO122668 /DB_XREF=gi:48821355 /DB_XREF=GR__Eb04G15.f /CLONE=GR__Eb04G15 /TID=Gra.2453.1 /CNT=3 /FEA=EST /TIER=ConsEnd /STK=0 /UG=Gra.2453 /UG_TITLE=Transcribed locus, strongly similar to XP_465992.1 putative elongation factor 2 (Oryza sativa (japonica cultivar-group)) /REP_ORG=G. raimondii	strongly similar to XP_465992.1 putative elongation factor 2 (Oryza sativa (japonica cultivar-group	XP_465992.1	putative elongation factor 2	Oryza sativa (japonica cultivar-group)
Ghi.10826.1.S1_at	DN827439	Ghi.10826	0.235177	2.88095	0.204358	0	0.202451	0	0.296197	0	0.496022	0.217711	gb:DN827439 /DB_XREF=gi:84158392 /DB_XREF=G.hir-20, 30 hrs post inoculation 749 /TID=Ghi.10826.1 /CNT=8 /FEA=EST /TIER=ConsEnd /STK=0 /UG=Ghi.10826 /UG_TITLE=Transcribed locus, weakly similar to XP_463703.1 putative glucan endo-1,3-beta-D-glucosidase (Oryza sativa (japonica cultivar-group)) /REP_ORG=G. hirsutum	putative glucan endo-1,3-beta-D-glucosidase	XP_463703.1	putative glucan endo-1,3-beta-D-glucosidase	Oryza sativa (japonica cultivar-group)	917
Ghi.9820.2.S1_s_at	DT553955	Ghi.9820	0.18312	0.598213	0.111796	0	0.131072	0	0.436321	0.685605	0.158639	0	gb:DT553955 /DB_XREF=gi:78333681 /DB_XREF=EST1064595 /TID=Ghi.9820.2 /CNT=58 /FEA=EST /TIER=ConsEnd /STK=0 /UG=Ghi.9820 /UG_TITLE=Transcribed locus, weakly similar to XP_469705.1 putative immediate-early salicylate-induced glucosyltransferase (Oryza sativa (japonica cultivar-group)) /REP_ORG=G. hirsutum	weakly similar to XP_469705.1 putative immediate-early salicylate-induced glucosyltransferase (Oryza sativa (japonica cultivar-group	XP_469705.1	putative immediate-early salicylate-induced glucosyltransferase	Oryza sativa (japonica cultivar-group)
Ghi.7351.1.S1_at	AI731381	Ghi.7351	0.467876	3.51349	0.443401	0	0.491517	0	0.365678	0.182477	0.466937	0.00931548	gb:AI731381 /DB_XREF=gi:5050233 /DB_XREF=BNLGHi8889 /TID=Ghi.7351.1 /CNT=9 /FEA=EST /TIER=ConsEnd /STK=0 /UG=Ghi.7351 /UG_TITLE=Transcribed locus, strongly similar to NP_912365.1 putative SERINETHREONINE PROTEIN PHOSPHATASE PP1 (Oryza sativa (japonica cultivar-group)) /REP_ORG=G. hirsutum	strongly similar to NP_912365.1 putative SERINETHREONINE PROTEIN PHOSPHATASE PP1 (Oryza sativa (japonica cultivar-group	NP_912365.1	putative SERINETHREONINE PROTEIN PHOSPHATASE PP1	Oryza sativa (japonica cultivar-group)
Gra.2308.1.A1_s_at	CO115739	Gra.2308	0.351666	1.16124	0.0846748	0	0.0969169	0	0.44686	0.920323	0.422072	0.0333442	gb:CO115739 /DB_XREF=gi:48814426 /DB_XREF=GR__Eb017K06.r /CLONE=GR__Eb017K06 /TID=Gra.2308.1 /CNT=10 /FEA=EST /TIER=ConsEnd /STK=0 /UG=Gra.2308 /UG_TITLE=Transcribed locus, moderately similar to NP_850147.1 signal transducer of phototropic response (RPT2) (Arabidopsis thaliana) /REP_ORG=G. raimondii	moderately similar to NP_850147.1 signal transducer of phototropic response (RPT2) (Arabidopsis thaliana	NP_850147.1	Root phototropism protein 2	Arabidopsis thaliana	593
Gra.1400.1.A1_at	CO119334	Gra.1400	0.402818	3.51349	0.250682	0	0.180101	0	0.446315	0.685605	0.250033	0	gb:CO119334 /DB_XREF=gi:48818021 /DB_XREF=GR__Eb022C24.r /CLONE=GR__Eb022C24 /TID=Gra.1400.1 /CNT=2 /FEA=EST /TIER=ConsEnd /STK=1 /UG=Gra.1400 /UG_TITLE=Transcribed locus, strongly similar to NP_186902.1 chaperonin, putative (Arabidopsis thaliana) /REP_ORG=G. raimondii	strongly similar to NP_186902.1 chaperonin	NP_186902.1	TCP-1/cpn60 chaperonin family protein	Arabidopsis thaliana	535
Ghi.2337.1.S1_s_at	DT559746	Ghi.2337	0.364794	4.15601	0.303475	0	0.220413	0	0.151729	0	0.192641	0	gb:DT559746 /DB_XREF=gi:78339472 /DB_XREF=EST1070386 /TID=Ghi.2337.1 /CNT=3 /FEA=EST /TIER=ConsEnd /STK=0 /UG=Ghi.2337 /UG_TITLE=Transcribed locus, moderately similar to NP_197266.1 unknown protein (Arabidopsis thaliana) /REP_ORG=G. hirsutum	moderately similar to NP_197266.1 unknown protein (Arabidopsis thaliana	NP_197266.1	uncharacterized protein	Arabidopsis thaliana	432
Gra.2572.1.A1_s_at	CO128624	Gra.2572	0.42212	4.15601	0.150632	0	0.143449	0	0.24501	0.0675814	0.183333	0	gb:CO128624 /DB_XREF=gi:48830234 /DB_XREF=GR__Eb25I21.r /CLONE=GR__Eb25I21 /TID=Gra.2572.1 /CNT=7 /FEA=EST /TIER=ConsEnd /STK=1 /UG=Gra.2572 /UG_TITLE=Transcribed locus, moderately similar to NP_201256.2 expressed protein (Arabidopsis thaliana) /REP_ORG=G. raimondii	moderately similar to NP_201256.2 expressed protein (Arabidopsis thaliana	NP_201256.2	uncharacterized protein	Arabidopsis thaliana	424
Ghi.10823.2.A1_s_at	DT462522	Ghi.10823	0.220649	1.89298	0.352318	0.0160349	0.273015	0	0.420947	0.453345	0.307232	0.0627412	gb:DT462522 /DB_XREF=gi:73859783 /DB_XREF=GH_CHX12D11.r /CLONE=GH_CHX12D11 /TID=Ghi.10823.2 /CNT=2 /FEA=EST /TIER=ConsEnd /STK=0 /UG=Ghi.10823 /UG_TITLE=Transcribed locus, weakly similar to XP_479703.1 unknown protein (Oryza sativa (japonica cultivar-group)) /REP_ORG=G. hirsutum	weakly similar to XP_479703.1 unknown protein (Oryza sativa (japonica cultivar-group	XP_479703.1	unknown protein	Oryza sativa (japonica cultivar-group)
Ghi.1121.1.A1_at	DN817305	Ghi.1121	0.275387	4.15601	0.0786114	0	0.276754	0	0.340177	0	0.30992	0	gb:DN817305 /DB_XREF=gi:84156079 /DB_XREF=G.hir-seedling 505 /TID=Ghi.1121.1 /CNT=1 /FEA=EST /TIER=ConsEnd /STK=0 /UG=Ghi.1121 /UG_TITLE=Transcribed locus /REP_ORG=G. hirsutum
Ghi.1121.1.S1_at	DN817305	Ghi.1121	0.194523	0.598213	0.108388	0	0.314919	0	0.314687	0	0.350434	0.00931548	gb:DN817305 /DB_XREF=gi:84156079 /DB_XREF=G.hir-seedling 505 /TID=Ghi.1121.1 /CNT=1 /FEA=EST /TIER=ConsEnd /STK=0 /UG=Ghi.1121 /UG_TITLE=Transcribed locus /REP_ORG=G. hirsutum
GhiAffx.11691.1.S1_at	DW229345.1	Ghi.16212	0.326172	1.26952	0.141443	0	0.113981	0	0.0755554	0	0.188313	0	gb:DW229345.1 dbest_id:34833517 /TID=GhiAffx.11691.1 /CNT=7 /FEA=EST /TIER=ConsEnd /STK=1 /NOTE=sequence(s) not in UniGene /REP_ORG=
GhiAffx.12507.1.S1_at	DW485677.1	Ghi.13489	0.452207	4.15601	0.230746	0	0.220192	0	0.329759	0.229225	0.176611	0	gb:DW485677.1 dbest_id:35090105 /TID=GhiAffx.12507.1 /CNT=4 /FEA=EST /TIER=ConsEnd /STK=0 /NOTE=sequence(s) not in UniGene /REP_ORG=
GhiAffx.14202.1.S1_at	DW488007.1	Ghi.13995	0.230056	1.16124	0.39549	0.051006	0.130902	0	0.408788	0.453345	0.221502	0.0292223	gb:DW488007.1 dbest_id:35092435 /TID=GhiAffx.14202.1 /CNT=5 /FEA=EST /TIER=ConsEnd /STK=0 /NOTE=sequence(s) not in UniGene /REP_ORG=
GhiAffx.19167.1.S1_s_at	DW487864.1	Ghi.2927	0.468287	4.15601	0.27358	0	0.387664	0	0.312454	0.104481	0.196908	0	gb:DW487864.1 dbest_id:35092292 /TID=GhiAffx.19167.1 /CNT=3 /FEA=EST /TIER=ConsEnd /STK=0 /NOTE=sequence(s) not in UniGene /REP_ORG=
GhiAffx.21428.1.S1_at	DW238060.1	Ghi.15616	0.464536	3.51349	0.371388	0	0.377545	0	0.402014	0.104481	0.427342	0	gb:DW238060.1 dbest_id:34842226 /TID=GhiAffx.21428.1 /CNT=7 /FEA=EST /TIER=ConsEnd /STK=1 /NOTE=sequence(s) not in UniGene /REP_ORG=
GhiAffx.24783.1.S1_at	DW512903.1	---	0.237595	0	0.116591	0	0.156029	0	0.289645	0.104481	0.215412	0	gb:DW512903.1 dbest_id:35118686 /TID=GhiAffx.24783.1 /CNT=2 /FEA=EST /TIER=ConsEnd /STK=1 /NOTE=sequence(s) not in UniGene /REP_ORG=
GhiAffx.27013.1.S1_at	DW493442.1	Ghi.15486	0.354359	2.47278	0.358138	0	0.217865	0	0.343322	0.229225	0.248795	0.00931548	gb:DW493442.1 dbest_id:35097870 /TID=GhiAffx.27013.1 /CNT=6 /FEA=EST /TIER=ConsEnd /STK=0 /NOTE=sequence(s) not in UniGene /REP_ORG=
GhiAffx.27988.1.S1_at	DT553601	---	0.355402	2.47278	0.155591	0	0.10777	0	0.331054	0.104481	0.195152	0	gb:DT553601 /DB_XREF=gi:78333327 /DB_XREF=EST1064241 /TID=GhiAffx.27988.1 /CNT=2 /FEA=EST /TIER=ConsEnd /STK=0 /NOTE=sequence(s) not in UniGene /REP_ORG=G. hirsutum
GhiAffx.28161.1.S1_s_at	DT463913	Ghi.17876	0.20919	3.51349	0.274692	0.0281106	0.21424	0	0.270097	0.23541	0.0619458	0	gb:DT463913 /DB_XREF=gi:73861174 /DB_XREF=GH_CHX14I04.r /CLONE=GH_CHX14I04 /TID=GhiAffx.28161.1 /CNT=2 /FEA=EST /TIER=ConsEnd /STK=0 /NOTE=sequence(s) not in UniGene /REP_ORG=G. hirsutum
GhiAffx.33542.1.S1_at	AI726934	Ghi.18769	0.452652	2.88095	0.435786	0.00334008	0.327289	0	0.485871	0.35423	0.357607	0.00931548	gb:AI726934 /DB_XREF=gi:5045786 /DB_XREF=BNLGHi6885 /TID=GhiAffx.33542.1 /CNT=1 /FEA=EST /TIER=ConsEnd /STK=0 /NOTE=sequence(s) not in UniGene /REP_ORG=G. hirsutum
GhiAffx.4085.1.A1_at	DW479054.1	Ghi.14821	0.404006	3.51349	0.229579	0	0.124374	0	0.328544	0.23541	0.212615	0	gb:DW479054.1 dbest_id:35083482 /TID=GhiAffx.4085.1 /CNT=5 /FEA=EST /TIER=ConsEnd /STK=0 /NOTE=sequence(s) not in UniGene /REP_ORG=
GhiAffx.4507.1.S1_s_at	DW483373.1	Ghi.12780	0.460807	3.91728	0.444748	0	0.367263	0	0.464165	0.317514	0.378674	0.00931548	gb:DW483373.1 dbest_id:35087801 /TID=GhiAffx.4507.1 /CNT=4 /FEA=EST /TIER=ConsEnd /STK=0 /NOTE=sequence(s) not in UniGene /REP_ORG=
GhiAffx.45247.1.S1_at	DW241605.1	---	0.325968	3.91728	0.284529	0.00334008	0.248877	0	0.329246	0.182477	0.239239	0.0238141	gb:DW241605.1 dbest_id:34845771 /TID=GhiAffx.45247.1 /CNT=1 /FEA=EST /TIER=ConsEnd /STK=0 /NOTE=sequence(s) not in UniGene /REP_ORG=
GhiAffx.4978.1.S1_at	DW492451.1	Ghi.10208	0.391646	3.91728	0.204277	0	0.210172	0	0.253499	0.104481	0.177116	0	gb:DW492451.1 dbest_id:35096879 /TID=GhiAffx.4978.1 /CNT=5 /FEA=EST /TIER=ConsEnd /STK=0 /NOTE=sequence(s) not in UniGene /REP_ORG=
GhiAffx.5371.1.S1_at	DW492285.1	Ghi.15355	0.310377	1.89298	0.436307	0.0281106	0.267649	0	0.301958	0.118058	0.324357	0.0366566	gb:DW492285.1 dbest_id:35096713 /TID=GhiAffx.5371.1 /CNT=7 /FEA=EST /TIER=ConsEnd /STK=0 /NOTE=sequence(s) not in UniGene /REP_ORG=
GhiAffx.8042.1.A1_at	DW518715.1	Ghi.11160	0.368564	0.598213	0.0602551	0	0.456013	0.0131618	0.302414	0	0.411979	0.00931548	gb:DW518715.1 dbest_id:35124498 /TID=GhiAffx.8042.1 /CNT=2 /FEA=EST /TIER=ConsEnd /STK=1 /NOTE=sequence(s) not in UniGene /REP_ORG=
GhiAffx.9327.1.S1_s_at	DT468911	Ghi.6575	0.289115	1.26952	0.387586	0.00334008	0.242812	0	0.407314	0.453345	0.268053	0.0238141	gb:DT468911 /DB_XREF=gi:73866173 /DB_XREF=GH_CHX22K10.r /CLONE=GH_CHX22K10 /TID=GhiAffx.9327.1 /CNT=2 /FEA=EST /TIER=ConsEnd /STK=0 /NOTE=sequence(s) not in UniGene /REP_ORG=G. hirsutum
GraAffx.12046.1.S1_s_at	CO072739	---	0.275487	2.47278	0.271037	0.00334008	0.166609	0	0.260332	0.104481	0.159808	0	gb:CO072739 /DB_XREF=gi:48742220 /DB_XREF=GR__Ea32B05.f /CLONE=GR__Ea32B05 /TID=GraAffx.12046.1 /CNT=2 /FEA=EST /TIER=ConsEnd /STK=0 /NOTE=sequence(s) not in UniGene /REP_ORG=G. raimondii
GraAffx.12153.1.A1_s_at	CO072221	---	0.319702	2.47278	0.121477	0	0.390027	0	0.381286	0.104481	0.364168	0	gb:CO072221 /DB_XREF=gi:48741702 /DB_XREF=GR__Ea31E14.r /CLONE=GR__Ea31E14 /TID=GraAffx.12153.1 /CNT=2 /FEA=EST /TIER=ConsEnd /STK=1 /NOTE=sequence(s) not in UniGene /REP_ORG=G. raimondii
GraAffx.19728.1.A1_s_at	CO131012	---	0.40547	3.51349	0.221975	0	0.243789	0	0.470027	0.453345	0.213233	0	gb:CO131012 /DB_XREF=gi:48879990 /DB_XREF=GR__Eb43B07.r /CLONE=GR__Eb43B07 /TID=GraAffx.19728.1 /CNT=6 /FEA=EST /TIER=ConsEnd /STK=2 /NOTE=sequence(s) not in UniGene /REP_ORG=G. raimondii
GraAffx.26327.1.A1_s_at	CO092538	---	0.278903	2.88095	0.25258	0	0.124477	0	0.215464	0.118058	0.190604	0	gb:CO092538 /DB_XREF=gi:48791224 /DB_XREF=GR__Ea13J18.r /CLONE=GR__Ea13J18 /TID=GraAffx.26327.1 /CNT=2 /FEA=EST /TIER=ConsEnd /STK=1 /NOTE=sequence(s) not in UniGene /REP_ORG=G. raimondii
GraAffx.28706.1.S1_s_at	CO131719	---	0.395397	2.88095	0.264384	0	0.278806	0	0.224354	0.104481	0.387957	0.0480414	gb:CO131719 /DB_XREF=gi:48880697 /DB_XREF=GR__Eb44C13.r /CLONE=GR__Eb44C13 /TID=GraAffx.28706.1 /CNT=4 /FEA=EST /TIER=ConsEnd /STK=1 /NOTE=sequence(s) not in UniGene /REP_ORG=G. raimondii
GraAffx.29914.1.S1_at	CO082198	---	0.414425	1.50613	0.410804	0	0.403395	0	0.363041	0.229225	0.351964	0	gb:CO082198 /DB_XREF=gi:48751679 /DB_XREF=GR__Ea46L01.r /CLONE=GR__Ea46L01 /TID=GraAffx.29914.1 /CNT=3 /FEA=EST /TIER=ConsEnd /STK=1 /NOTE=sequence(s) not in UniGene /REP_ORG=G. raimondii
GraAffx.30233.1.A1_at	CO081946	---	0.39199	3.51349	0.310563	0	0.320721	0	0.416331	0.23541	0.29856	0.00931548	gb:CO081946 /DB_XREF=gi:48751427 /DB_XREF=GR__Ea46F06.r /CLONE=GR__Ea46F06 /TID=GraAffx.30233.1 /CNT=4 /FEA=EST /TIER=ConsEnd /STK=1 /NOTE=sequence(s) not in UniGene /REP_ORG=G. raimondii
GraAffx.33590.1.A1_at	CO116978	---	0.401418	2.47278	0.240781	0	0.242994	0	0.467055	0.35423	0.337916	0	gb:CO116978 /DB_XREF=gi:48815665 /DB_XREF=GR__Eb019I09.r /CLONE=GR__Eb019I09 /TID=GraAffx.33590.1 /CNT=6 /FEA=EST /TIER=ConsEnd /STK=1 /NOTE=sequence(s) not in UniGene /REP_ORG=G. raimondii
GraAffx.33625.1.A1_at	CO071632	---	0.350209	1.89298	0.277164	0	0.204914	0	0.40767	0.453345	0.365613	0.0366566	gb:CO071632 /DB_XREF=gi:48741113 /DB_XREF=GR__Ea30B01.r /CLONE=GR__Ea30B01 /TID=GraAffx.33625.1 /CNT=7 /FEA=EST /TIER=ConsEnd /STK=2 /NOTE=sequence(s) not in UniGene /REP_ORG=G. raimondii
GraAffx.3709.1.S1_s_at	CO114801	Gra.3210	0.407598	3.91728	0.118154	0	0.179825	0	0.474633	0.920323	0.260263	0	gb:CO114801 /DB_XREF=gi:48813488 /DB_XREF=GR__Eb016C10.r /CLONE=GR__Eb016C10 /TID=GraAffx.3709.1 /CNT=5 /FEA=EST /TIER=ConsEnd /STK=1 /NOTE=sequence(s) not in UniGene /REP_ORG=G. raimondii
